# Supplementary material for: Light-independent regulation of algal photoprotection by CO2 availability
Source: Research Square preprint supplement (doi:10.21203/rs.3.rs-1886294/v1), 2022-08-03
Supplement: Supplementary file 1 [file a29c5c6f605b175c22d8179e.xlsx]

## Sheet: A - non overlapping
Reactions whose minimum flux in the mutant was above the maximum flux of the WT (up-regulation) or the maximum flux in the mutant was below the minimum observed in the WT (down-regulation). Marked cells for down regulation under HL + acetate represent reactions also down regulated under LL in dum11.
Condition/ regulation type	icl		dum11
	Reaction name	Pathway	Reaction name	Pathway
LL up-regulation
LL down-regulation
HL up-regulation
HL down-regulation			Sedoheptulose 1,7-bisphosphate D-glyceraldehyde-3-phosphate-lyase	Carbon fixation
			phosphoribulokinase	Carbon fixation
			ribulose-bisphosphate carboxylase	Carbon fixation
			sedoheptulose-bisphosphatase	Carbon fixation
			F0F1-ATP synthase Complex V	Oxidative phosphorylation
			ubiquinol-cytochrome c oxidoreductase Complex III	Oxidative phosphorylation
			transaldolase	Pentose phosphate pathway
			Biomass (photoautotrophic) updated	Biomass
HL + acetate up-regulation
HL + acetate down-regulation	UDP-L-arabinose 4-epimerase	Amino sugar and nucleotide sugar metabolism	UDP-L-arabinose 4-epimerase	Amino sugar and nucleotide sugar metabolism
	Isocitrate lyase	Glyoxylate metabolism	enolase	Glycolysis / Gluconeogenesis
	malate synthase, mitochondrial	Glyoxylate metabolism,Pyruvate metabolism	pyruvate kinase	Carbon fixation,Glycolysis / Gluconeogenesis
	dolichyl-phosphate beta-D-mannosyltransferase	N-Glycan biosynthesis	Isocitrate lyase	Glyoxylate metabolism
	Inorganic diphosphatase	Oxidative phosphorylation	malate synthase, mitochondrial	Glyoxylate metabolism,Pyruvate metabolism
	UDP-glucuronate decarboxylase	Starch and sucrose metabolism	dolichyl-phosphate beta-D-mannosyltransferase	N-Glycan biosynthesis
	glucose-1-phosphate adenylyltransferase (chloroplast)	Starch metabolism	F0F1-ATP synthase Complex V	Oxidative phosphorylation
	acetate transport in via proton symport	Transport, extracellular	Cytochrome c peroxidase, mitochondrial	Oxidative phosphorylation
	ammonia transport, extracellular	Transport, extracellular	ubiquinol-cytochrome c oxidoreductase Complex III	Oxidative phosphorylation
	phosphate transport, extracellular	Transport, extracellular	Inorganic diphosphatase	Oxidative phosphorylation
	Biomass (mixotrophic) updated	Biomass	6-phosphogluconate dehydrogenase	Pentose phosphate pathway
			6-phosphogluconolactonase	Pentose phosphate pathway
			UDP-glucuronate decarboxylase	Starch and sucrose metabolism
			glucose-1-phosphate adenylyltransferase (chloroplast)	Starch metabolism
			fumarate hydratase	CO2 fixation,TCA cycle
			phosphoenolpyruvate carboxykinase, mitochondria	Carbon fixation,Pyruvate metabolism,TCA cycle
			acetate transport in via proton symport	Transport, extracellular
			ammonia transport, extracellular	Transport, extracellular
			phosphate transport, extracellular	Transport, extracellular
			Biomass (mixotrophic) updated	Biomass

## Sheet: B - FVA_sampling
Flux ranges obtained from flux variability analysis as well as mean and median flux from sampling of 5000 flux distributions.
Reactions marked in green show significant difference under HL+acetate but not under LL and HL conditions.
0											LL_WT_min	LL_WT_max	mean_sampled_LL_WT	median_sampled_LL_WT	LL_icl_min	LL_icl_max	mean_sampled_LL_icl	mean compared to WT	median_sampled_LL_icl	P_value_LL_icl (KS-test)	corrected P_value_LL_icl (t-test)	LL_dum11_min	LL_dum11_max	mean_sampled_LL_dum11	mean compared to WT	median_sampled_LL_dum11	P_value_LL_dum11 (KS-test)	corrected P_value_LL_dum11 (t-test)	change in icl and dum11 (1- yes, 0 - no)	HL_WT_min	HL_WT_max	mean_sampled_HL_WT	median_sampled_HL_WT	HL_icl_min	HL_icl_max	mean_sampled_HL_icl	mean compared to WT	median_sampled_HL_icl	P_value_HL_icl (KS-test)	corrected P_value_HL_icl (t-test)	HL_dum11_min	HL_dum11_max	mean_sampled_HL_dum11	mean compared to WT	median_sampled_HL_dum11	P_value_HL_dum11 (KS-test)	corrected P_value_HL_dum11 (t-test)	change in icl and dum11 (1- yes, 0 - no)	HL_ac_WT_min
-2											Low light (LL)																			high light (HL)																			high light + acetate (HL_ac)
-1	no difference LL and HL but in HL+acetate (1- yes, 0 - no)	up/ down-regulation under HL+ac (for reactions with no difference under LL and HL)	no difference in HL but in HL+acetate and LL (1- yes, 0 - no)	no difference in LL but in HL+acetate and HL (1- yes, 0 - no)	Equation	Directionality	Pathway	Protein Classification	Reaction ID	Name	WT				icl					icl to WT		dum11					dum11 to WT			WT				icl					icl to WT		dum11					dum11 to WT			WT
1	0		0	1	[m] : ala-L + akg <==> pyr + glu-L	Reversible	Alanine and aspartate metabolism	2.6.1.2	AAT	alanine aminotransferase, mitochondrial	-1000	1000	35.4839	0	-1000	1000	34.4428	0	0	0.417968	1.02618	-1000	1000	7.08653	0	0	2.35938e-81	9.93563e-102	0	-1000	1000	38.0033	0	-1000	1000	278.469	1	276.464	0	0	-999.959	1000	220.354	1	182.236	0	0	1	-1000
2	0		0	0	[m] : atp + ala-L + trnaala --> amp + ppi + alatrna + h	Forward only	Alanine and aspartate metabolism	6.1.1.7	ALATLm	alanine---tRNA ligase	0	0	0	0	0	0	0	0	0	1	NaN	0	0	0	0	0	1	NaN	0	0	0	0	0	0	0	0	0	0	1	NaN	0	0	0	0	0	1	NaN	0	0
3	0		0	0	[m] : atp + asn-L + trnaasn --> amp + ppi + asntrna + h	Forward only	Alanine and aspartate metabolism	6.1.1.22	ASNTLm	asparagine---tRNA ligase	0	0	0	0	0	0	0	0	0	1	NaN	0	0	0	0	0	1	NaN	0	0	0	0	0	0	0	0	0	0	1	NaN	0	0	0	0	0	1	NaN	0	0
4	1		0	0	[c] : asp-L + h2o + o2 --> oaa + nh4 + h2o2	Forward only	Alanine and aspartate metabolism	1.4.3.16	ASPO	L-aspartate oxidase	0	2.671	0.0151941	0.00633787	0	2.671	0.015822	0	0.00743418	6.11361e-18	1.00501	0	0.356657	0.00120292	0	0.000498257	0	2.76358e-82	0	0	3.27825	0.0259757	0.0114207	0	3.27825	0.0224801	0	0.0118332	0.000596179	0.0697151	0	0.143482	0.000179661	0	5.45815e-05	0	9.04339e-104	0	0
5	1		0	0	[m] : asp-L + h2o + o2 --> oaa + nh4 + h2o2	Forward only	Alanine and aspartate metabolism	1.4.3.16	ASPOm	L-aspartate oxidase, mitochondria	0	2.671	0.0264418	0.0120518	0	2.671	0.0264487	0	0.0131115	7.02869e-06	1.50169	0	0.356657	0.00315078	0	0.00141324	0	2.54163e-145	0	0	3.27825	0.0326652	0.0151102	0	3.27825	0.0355504	0	0.0188882	1.34706e-27	0.242899	0	0.143482	0.000482927	0	0.000223784	0	1.34754e-159	0	0
6	0		0	0	[m] : trnaasp + asp-L + atp --> asptrna + ppi + amp	Forward only	Alanine and aspartate metabolism	6.1.1.12	ASPTLm	aspartate---tRNA ligase	0	0	0	0	0	0	0	0	0	1	NaN	0	0	0	0	0	1	NaN	0	0	0	0	0	0	0	0	0	0	1	NaN	0	0	0	0	0	1	NaN	0	0
7	1		0	0	[c] : atp + asn-L + trnaasn --> amp + ppi + asntrna + h	Forward only	Alanine and aspartate metabolism	6.1.1.22	ASNTL	asparagine---tRNA ligase	0.00409047	0.0206147	0.00409486	0.00409214	0.00409047	0.0206147	0.00409606	0	0.00409219	4.40964e-05	0.487401	0.00409047	0.0206147	0.00409454	0	0.00409217	0.105511	0.97933	0	0.00736284	0.037519	0.00737002	0.00736592	0.00736284	0.037519	0.00737022	0	0.00736616	1.07945e-06	1.32171	0.00680559	0.0546331	0.00681982	0	0.00681087	0	0	0	0.00438146
8	1		0	0	[c] : atp + asp-L + trnaasp --> amp + ppi + asptrna + h	Forward only	Alanine and aspartate metabolism	6.1.1.12	ASPTL	aspartate---tRNA ligase	0.00409047	0.0206147	0.00409477	0.00409217	0.00409047	0.0206147	0.00409636	0	0.00409244	9.97296e-27	0.0566062	0.00409047	0.0206147	0.00409499	0	0.00409212	0.0670209	1.19856	0	0.00736284	0.037519	0.00737118	0.00736578	0.00736284	0.037519	0.00737074	0	0.00736639	1.14029e-38	1.2874	0.00680559	0.0546331	0.00682118	0	0.0068109	0	0	0	0.00438146
9	1		0	0	[c] : atp + ala-L + trnaala --> amp + ppi + alatrna + h	Forward only	Alanine and aspartate metabolism	6.1.1.7	ALATL	alanine---tRNA ligase	0.016508	0.0330322	0.0165119	0.0165097	0.016508	0.0330322	0.0165131	0	0.01651	5.06026e-24	0.0378349	0.016508	0.0330322	0.0165114	0	0.0165098	4.29442e-85	0.538084	0	0.0297143	0.0598705	0.0297237	0.0297174	0.0297143	0.0598705	0.0297225	0	0.0297177	1.29711e-07	0.790474	0.0274654	0.0752929	0.0274849	0	0.0274711	0	0	0	0.0175953
10	1		0	0	[c] : alatrna + h2o --> ala-L + trnaala	Forward only	Alanine and aspartate metabolism	3.1.1.29	ALATAH	Alanine-tRNA aminoacylhydrolase	0	0.0165242	3.81839e-06	1.72011e-06	0	0.0165242	5.02534e-06	0	2.0287e-06	5.06026e-24	0.0372102	0	0.0165242	3.36161e-06	0	1.829e-06	4.29442e-85	0.642597	0	0	0.0301561	9.35518e-06	3.09052e-06	0	0.0301561	8.06766e-06	0	3.33942e-06	1.29711e-07	0.790474	0	0.0478275	1.95122e-05	0	5.69743e-06	4.45446e-249	3.09184e-05	0	0
11	1		0	0	[c] : asntrna + h2o --> asn-L + trnaasn	Forward only	Alanine and aspartate metabolism	3.1.1.29	ASNTAH	Asparagine-tRNA aminoacylhydrolase	0	0.0165242	4.27729e-06	1.67353e-06	0	0.0165242	5.46936e-06	0	1.72094e-06	4.40964e-05	0.49575	0	0.0165242	3.94952e-06	0	1.70506e-06	0.105511	0.969752	0	0	0.0301561	7.12688e-06	3.08083e-06	0	0.0301561	7.33534e-06	0	3.31913e-06	1.07945e-06	1.31942	0	0.0478275	1.42094e-05	0	5.28617e-06	4.75446e-271	6.12911e-06	0	0
12	0		0	0	[c] : asptrna + h2o --> asp-L + trnaasp	Forward only	Alanine and aspartate metabolism	3.1.1.29	ASPTAH	Aspartate-tRNA aminoacylhydrolase	0	0.0165242	4.17587e-06	1.69761e-06	0	0.0165242	5.78397e-06	0	1.97402e-06	9.97296e-27	0.0534548	0	0.0165242	4.40457e-06	0	1.6495e-06	0.0670209	1.19702	0	0	0.0301561	8.29567e-06	2.93391e-06	0	0.0301561	7.85921e-06	0	3.54799e-06	1.14029e-38	1.28892	0	0.0478275	1.55639e-05	0	5.31332e-06	2.14035e-291	0.00173015	0	0
13	0		0	0	[h] : akg + asp-L <==> glu-L + oaa	Reversible	Alanine and aspartate metabolism;Glycine, serine and threonine metabolism	2.6.1.1	ASPATh	aspartate aminotransferase, chloroplast	-23.3435	2.56956	0.000143808	0	-23.3435	2.56956	0	0	0	1	0.384958	-1.05264	0.72329	0.00336821	0	0	2.79967e-06	8.79147e-23	0	-28.7632	2.97564	0	0	-28.7632	2.97564	0	0	0	1	NaN	-0.196104	0.494188	0.0258305	0	0.0173566	0	0	0	-51.4886
14	0		0	0	[m] : ala-L + glx --> pyr + gly	Forward only	Alanine and aspartate metabolism;Glycine, serine and threonine metabolism	2.6.1.44	AGAT	alanine---glyoxylate aminotransferase	0	0.0330484	0.000105567	4.06598e-05	0	0.0132194	6.53153e-05	-1	2.58488e-05	1.83619e-129	8.21807e-09	0	0.0330484	2.94712e-06	-1	1.66658e-06	0	1.25819e-76	1	0	0.0603123	0.000210365	8.81899e-05	0	0.0241249	6.72608e-06	-1	1.65723e-06	0	2.01416e-63	0	0.031885	4.20464e-05	-1	1.3793e-05	0	2.06036e-40	1	0
15	0		0	0	[x] : ala-L + glx --> pyr + gly	Forward only	Alanine and aspartate metabolism;Glycine, serine and threonine metabolism	2.6.1.44	AGATx	alanine---glyoxylate aminotransferase, glyoxysome	0	0	0	0	0	0	0	0	0	1	NaN	0	0	0	0	0	1	NaN	0	0	0	0	0	0	0	0	0	0	1	NaN	0	0	0	0	0	1	NaN	0	0
16	1		0	0	[c] : atp + asp-L + gln-L + h2o --> amp + ppi + asn-L + glu-L + h	Forward only	Alanine and aspartate metabolism;Nitrogen metabolism	6.3.5.4	ASPS	asparagine synthase (glutamine-hydrolysing)	0.00409047	0.0151066	0.00410289	0.00409491	0.00409047	0.0151066	0.00410269	0	0.00409521	7.33298e-12	1.44588	0.00409047	0.0151066	0.00410528	0	0.00409553	4.13284e-14	0.432222	0	0.00748595	0.02759	0.00751777	0.00749619	0.00748595	0.02759	0.00751185	0	0.00749638	1.87188e-10	0.441354	0.00685764	0.0387426	0.00689708	0	0.00687144	0	0	0	0.00701395
17	0		0	0	[x] : asn-L + h2o + h --> asp-L + nh4	Forward only	Alanine and aspartate metabolism;Nitrogen metabolism	3.5.1.1	ASPSE	asparaginase	0	0.0110161	9.36318e-06	2.85301e-06	0	0.0110161	9.18596e-06	0	3.09507e-06	1.21201e-09	1.45285	0	0.0110161	1.14735e-05	0	3.21213e-06	1.63314e-10	0.51809	0	0	0.0201041	2.63667e-05	6.79216e-06	0	0.0201041	2.03792e-05	0	6.93962e-06	1.07945e-06	0.426739	0	0.031885	3.44526e-05	0	1.03334e-05	4.29236e-89	0.2556	0	0
18	1		0	0	[c] : acgam6p <==> acgam1p	Reversible	Amino sugar and nucleotide sugar metabolism	5.4.2.3	ACGAMPM	N-Acetyl-D-glucosamine 1-phosphate 1,6-phosphomutase	0	0.000759734	5.8719e-06	2.15429e-06	0	0.000759734	5.86352e-06	0	2.3591e-06	9.69036e-07	1.4933	0	0.000759734	6.46207e-06	0	2.38569e-06	5.64443e-09	0.460281	0	0.000246221	0.00163271	0.000257064	0.000250397	0.000246221	0.00163271	0.000257208	0	0.00025121	1.79323e-32	1.37968	0.000104104	0.00117287	0.000114057	0	0.000108137	0	0	0	0.00526497
19	0		0	0	[c] : gam6p + h2o <==> f6p-B + nh4	Reversible	Amino sugar and nucleotide sugar metabolism	3.5.99.6	G6PDA	D-glucosamine-6-phosphate aminohydrolase (ketol isomerizing)	-0.000759734	0.0330484	0.000480597	0.000166257	-0.000759734	0.0330484	0.000114297	0	5.45366e-05	0	1.48686e-198	-0.000759734	0.0330484	3.82302e-05	0	1.07771e-05	0	2.82947220937000e-312	0	-0.00163271	0.060066	0.000137475	0	-0.00163271	0.060066	8.09632e-05	-1	0	1.33784e-06	0.00177015	-0.00117287	0.0955508	5.02072e-05	-1	0	5.94705e-15	5.06049e-07	1	-0.00783018
20	0		0	1	[c] : udpxyl <==> udparab	Reversible	Amino sugar and nucleotide sugar metabolism	5.1.3.5	UA4E	UDP-L-arabinose 4-epimerase	0.00499547	0.00499547	0.00499547	0.00499547	0.00499547	0.00499547	0.00499547	0	0.00499547	9.69036e-07	0.782965	0.00499547	0.00499547	0.00499547	0	0.00499547	5.58551e-171	1.17153e-97	0	0.00899185	0.00899185	0.00899185	0.00899185	0.00899185	0.00899185	0.00899185	-1	0.00899185	0	0	0.0083113	0.0083113	0.0083113	-1	0.0083113	0	0	1	0.033025
21	1		0	0	[c] : utp + acgam1p + h <==> ppi + uacgam	Reversible	Amino sugar and nucleotide sugar metabolism	2.7.7.23	UDPACGLP	UTP:N-acetyl-alpha-D-glucosamine-1-phosphate uridylyltransferase	0	0.000759734	5.8719e-06	2.15429e-06	0	0.000759734	5.86352e-06	0	2.3591e-06	9.69036e-07	1.4933	0	0.000759734	6.46207e-06	0	2.38569e-06	5.64443e-09	0.460281	0	0.000246221	0.00163271	0.000257064	0.000250397	0.000246221	0.00163271	0.000257208	0	0.00025121	1.79323e-32	1.37968	0.000104104	0.00117287	0.000114057	0	0.000108137	0	0	0	0.00526497
22	0		0	0	[c] : atp + arab-L --> adp + B-ara1p + h	Forward only	Amino sugar and nucleotide sugar metabolism	2.7.1.46	AAPT	ATP:L-arabinose 1-phosphotransferase	0	0.0330484	1.09031e-05	4.99255e-06	0	0.0330484	1.46454e-05	0	5.80835e-06	1.40534e-32	0.0298	0	0.0330484	1.38708e-05	0	5.00353e-06	1.19193e-08	0.0838342	0	0	0.0603123	3.00084e-05	1.0897e-05	0	0.0603123	2.62368e-05	0	1.11575e-05	8.24844e-15	0.454733	0	0.0956549	4.41641e-05	0	1.68948e-05	2.10679e-143	0.000166917	0	0
23	1		0	0	[c] : accoa + gam6p --> coa + acgam6p + h	Forward only	Amino sugar and nucleotide sugar metabolism	2.3.1.4	ACGAM6PSi	acetyl-CoA:D-glucosamine-6-phosphate N-acetyltransferase	0	0.000759734	5.8719e-06	2.15429e-06	0	0.000759734	5.86352e-06	0	2.3591e-06	9.69036e-07	1.4933	0	0.000759734	6.46207e-06	0	2.38569e-06	5.64443e-09	0.460281	0	0.000246221	0.00163271	0.000257064	0.000250397	0.000246221	0.00163271	0.000257208	0	0.00025121	1.79323e-32	1.37968	0.000104104	0.00117287	0.000114057	0	0.000108137	0	0	0	0.00526497
24	0		0	1	[c] : gln-L + f6p-B --> glu-L + gam6p	Forward only	Amino sugar and nucleotide sugar metabolism	2.6.1.16	GF6PTA	L-glutamine:D-fructose-6-phosphate isomerase (deaminating)	0	0.0330484	0.000484843	0.000169659	0	0.0330484	0.000118639	0	5.86088e-05	0	1.67946e-198	0	0.0330484	4.17913e-05	0	1.41923e-05	0	3.85158308550000e-313	0	0	0.0603123	0.000265461	0.00011063	0	0.0603123	0.000192904	-1	9.17757e-05	1.25217e-17	4.52051e-05	0	0.0956549	8.96755e-05	-1	2.7777e-05	0	2.78673e-24	1	0
25	1		0	0	[c] : udparab + h2o --> arab-L + udp + h	Forward only	Amino sugar and nucleotide sugar metabolism	3.2.1.55	UAD	UDP-L-arabinose degradation	0.00499547	0.0380439	0.00500639	0.00500047	0.00499547	0.0380439	0.00501014	0	0.00500128	1.40534e-32	0.0295016	0.00499547	0.0380439	0.00500937	0	0.00500048	1.19193e-08	0.0823046	0	0.00899185	0.0693041	0.00902187	0.00900275	0.00899185	0.0693041	0.0090181	0	0.00900301	8.24844e-15	0.454733	0.0083113	0.103966	0.00835547	0	0.0083282	0	0	0	0.033025
26	0		0	0	[c] : udpgal + (2) nad + h2o --> udpgalur + (2) nadh + (3) h	Forward only	Amino sugar and nucleotide sugar metabolism	1.1.1.-	UDPGALOR	UDP-D-galactose:NAD+ 6-oxidoreductase	0	0.00499547	0.00155587	0.00141717	0	0.00499547	0.00160275	1	0.0014639	0.00369027	0.00609478	0	0.00499547	0.00169362	1	0.0015697	1.24321e-12	2.58265e-19	1	0	0.00899185	0.00602564	0.00627577	0	0.00899185	0.00288116	-1	0.00258626	0	0	0	0.0083113	0.00296276	-1	0.00280684	0	0	1	0
27	0		0	0	[c] : udp + B-ara1p + h --> pi + udparab	Forward only	Amino sugar and nucleotide sugar metabolism	2.7.7.64	UMPU	UTP:UTP-monosaccharide-1-phosphate uridylyltransferase	0	0.0330484	1.09031e-05	4.99255e-06	0	0.0330484	1.46454e-05	0	5.80835e-06	1.40534e-32	0.0298	0	0.0330484	1.38708e-05	0	5.00353e-06	1.19193e-08	0.0838342	0	0	0.0603123	3.00084e-05	1.0897e-05	0	0.0603123	2.62368e-05	0	1.11575e-05	8.24844e-15	0.454733	0	0.0956549	4.41641e-05	0	1.68948e-05	2.10679e-143	0.000166917	0	0
28	0		0	1	[c] : acg5sa + glu-L <==> acorn + akg	Reversible	Arginine and proline metabolism	2.6.1.11	AOTA	acetylornithine transaminase	0.00905747	0.0421059	0.00914584	0.00909664	0.00905747	0.0421059	0.00913356	0	0.00909141	7.99684e-27	0.255952	0.00905747	0.0421059	0.00911852	0	0.00908256	3.18404e-171	0.000386173	0	0.0163034	0.0766157	0.0164153	0.0163559	0.0163034	0.0766157	0.0164911	1	0.0164003	8.50942e-257	1.14586e-08	0.0150695	0.110724	0.0152548	-1	0.015151	0	0	1	0.00590109
29	0		0	0	[m] : acg5sa + glu-L <==> acorn + akg	Reversible	Arginine and proline metabolism	2.6.1.11	AOTAm	acetylornithine transaminase, mitochondria	0	0	0	0	0	0	0	0	0	1	NaN	0	0	0	0	0	1	NaN	0	0	0	0	0	0	0	0	0	0	1	NaN	0	0	0	0	0	1	NaN	0	0
30	0		0	0	[c] : acorn + glu-L <==> orn + acglu	Reversible	Arginine and proline metabolism	2.3.1.35	GACT	glutamate N-acetyltransferase	-11.5653	0.0421059	5.01217e-05	0	-11.5653	0.0421059	2.39572e-05	0	0	1	0.0276235	-0.466485	0.0421059	0.00577224	0	0.00656844	0	0	0	-14.1895	0.0766157	7.72414e-05	0	-14.1895	0.0766157	8.11323e-05	0	0	1	1.37968	-0.0805854	0.110724	0.0150309	0	0.0150604	0	0	0	-25.406
31	1		0	0	[c] : glu5sa <==> 1pyr5c + h2o + h	Reversible	Arginine and proline metabolism		GSC	Glutamate semialdehyde conversion	0.00284872	0.0358972	0.00286975	0.00285773	0.00284872	0.0358972	0.00286738	0	0.00285772	7.79995e-07	0.421492	0.00284872	0.0358972	0.00286873	0	0.0028572	3.03206e-05	1.04057	0	0.00512769	0.06544	0.00517958	0.00514706	0.00512769	0.06544	0.00517464	0	0.00514767	0.013259	0.647017	0.00473961	0.0457346	0.00477304	0	0.00475283	0	0	0	0.00327067
32	0		0	0	[m] : glu5sa + nad + h2o <==> glu-L + nadh + (2) h	Reversible	Arginine and proline metabolism	1.2.1.88	LGGSOR	L-glutamate gamma-semialdehyde:NAD+ oxidoreductase	-0.00413106	0.0330484	7.29025e-05	3.0183e-05	-0.00413106	0.0330484	5.62953e-05	0	2.26718e-05	1.7743e-66	0.0598167	-0.00413106	0.0330484	4.35568e-05	0	1.51562e-05	6.4992e-282	5.60366e-05	0	-0.00753903	0.0603123	8.30429e-05	3.41454e-05	-0.00753903	0.0603123	0.000155436	1	7.33957e-05	3.60652e-289	1.90987e-08	-0.00431526	0.0956549	0.000161385	1	6.64495e-05	3.79547e-231	1.3812e-09	1	-0.0147072
33	1		0	0	[m] : pro-L + q8 --> 1pyr5c + q8h2 + h	Reversible	Arginine and proline metabolism	1.5.5.2	PROOR	L-proline:quinone oxidoreductase	0	4.5565	0.0550845	0.0262074	0	4.5565	0.0562835	0	0.0280341	0.000335377	1.16377	0	0.356657	0.000593323	0	0.000224349	0	2.44139e-176	0	0	5.92426	0.0749096	0.0343831	0	5.92426	0.0713853	0	0.0368224	0.00239091	0.758383	0	0.0717412	9.98772e-05	0	3.98565e-05	0	1.49001e-170	0	0
34	0		0	1	[c] : accoa + glu-L --> coa + acglu + h	Forward only	Arginine and proline metabolism	2.3.1.1	AAAT	amino-acid N-acetyltransferase	0	11.5743	0.565661	0.320604	0	11.5743	0.584937	0	0.362697	3.16225e-13	0.425173	0	0.475542	0.00549089	0	0.00254211	0	0	0	0	14.2058	0.797064	0.480085	0	14.2058	0.748363	-1	0.482945	0.013259	0.0364307	0	0.0956549	0.000229681	-1	9.61408e-05	0	0	1	0
35	1		0	0	[c] : 4abut + his-L --> hcarn + h2o	Forward only	Arginine and proline metabolism	3.4.13.3	AABHH	alpha-Aminobutyryl histidine hydrolase	0	0.00122402	2.42931e-07	0	0	0.00122402	2.17337e-07	0	0	0.834667	1.30425	0	0.00122402	2.55349e-07	0	0	0.256978	1.393	0	0	0.00223379	4.83942e-07	0	0	0.00223379	3.7314e-07	0	0	0.246768	0.998481	0	0.0017287	1.87588e-07	0	0	0.0460384	0.116213	0	0
36	0		0	1	[c] : acg5p + nadph + h --> acg5sa + pi + nadp	Forward only	Arginine and proline metabolism	1.2.1.38	AGGPR	N-acetyl-gamma-glutamyl-phosphate reductase	0.00905747	0.0421059	0.00914584	0.00909664	0.00905747	0.0421059	0.00913356	0	0.00909141	7.99684e-27	0.255952	0.00905747	0.0421059	0.00911852	0	0.00908256	3.18404e-171	0.000386173	0	0.0163034	0.0766157	0.0164153	0.0163559	0.0163034	0.0766157	0.0164911	1	0.0164003	8.50942e-257	1.14586e-08	0.0150695	0.110724	0.0152548	-1	0.015151	0	0	1	0.00590109
37	0		0	1	[c] : atp + acglu --> adp + acg5p	Forward only	Arginine and proline metabolism	2.7.2.8	AGK	acetylglutamate kinase	0.00905747	0.0421059	0.00914584	0.00909664	0.00905747	0.0421059	0.00913356	0	0.00909141	7.99684e-27	0.255952	0.00905747	0.0421059	0.00911852	0	0.00908256	3.18404e-171	0.000386173	0	0.0163034	0.0766157	0.0164153	0.0163559	0.0163034	0.0766157	0.0164911	1	0.0164003	8.50942e-257	1.14586e-08	0.0150695	0.110724	0.0152548	-1	0.015151	0	0	1	0.00590109
38	0		0	1	[c] : acorn + h2o --> ac + orn	Forward only	Arginine and proline metabolism	3.5.1.16;3.5.1.14	AODAA	acetylornithine deacetylase aminoacylase	0	11.5743	0.565661	0.320604	0	11.5743	0.584937	0	0.362697	3.16225e-13	0.425173	0	0.475542	0.00549089	0	0.00254211	0	0	0	0	14.2058	0.797064	0.480085	0	14.2058	0.748363	-1	0.482945	0.013259	0.0364307	2.20756e-18	0.0956549	0.000229681	-1	9.61408e-05	0	0	1	0
39	0		0	1	[c] : arg-L + h2o + h --> citr-L + nh4	Forward only	Arginine and proline metabolism	3.5.3.6	ARGDI	arginine deiminase	0	0.0165242	8.15608e-06	3.01932e-06	0	0.0165242	6.97027e-06	0	2.78384e-06	2.63454e-09	0.526197	0	0.0165242	1.08231e-05	0	2.69104e-06	1.48755e-38	0.139486	0	0	0.0301561	1.27575e-05	4.69778e-06	0	0.0301561	4.45199e-06	-1	1.86304e-06	0	3.01338e-08	0	0.0478275	2.75829e-05	1	8.86645e-06	2.77145e-232	1.46785e-07	1	0
40	0		0	1	[c] : atp + arg-L + trnaarg --> amp + ppi + argtrna + h	Forward only	Arginine and proline metabolism	6.1.1.19	ARGT	arginine---tRNA ligase	0.00905747	0.0255817	0.00906137	0.00905913	0.00905747	0.0255817	0.00906159	0	0.00905929	7.31814e-18	1.10029	0.00905747	0.0255817	0.00906158	0	0.0090592	1.15558e-07	1.05628	0	0.0163034	0.0464596	0.0163108	0.0163067	0.0163034	0.0464596	0.0163179	1	0.0163079	3.76959e-100	9.50779e-06	0.0150695	0.062897	0.0150896	-1	0.0150749	0	0	1	0.00590109
41	1		0	0	[c] : glu5p + nadph + h --> glu5sa + pi + nadp	Forward only	Arginine and proline metabolism	1.2.1.41	G5DH	glutamate-5-semialdehyde dehydrogenase	0.00284872	0.0358972	0.00286975	0.00285773	0.00284872	0.0358972	0.00286738	0	0.00285772	7.79995e-07	0.421492	0.00284872	0.0358972	0.00286873	0	0.0028572	3.03206e-05	1.04057	0	0.00512769	0.06544	0.00517958	0.00514706	0.00512769	0.06544	0.00517464	0	0.00514767	0.013259	0.647017	0.00473961	0.0457346	0.00477304	0	0.00475283	0	0	0	0.00327067
42	0		0	0	[m] : glu5p + nadph + h --> glu5sa + pi + nadp	Forward only	Arginine and proline metabolism	1.2.1.41	G5DHm	glutamate-5-semialdehyde dehydrogenase, mitochondria	0	0	0	0	0	0	0	0	0	1	NaN	0	0	0	0	0	1	NaN	0	0	0	0	0	0	0	0	0	0	1	NaN	0	0	0	0	0	1	NaN	0	0
43	0		0	0	[x] : glu5p + nadph + h --> glu5sa + pi + nadp	Forward only	Arginine and proline metabolism	1.2.1.41	G5DHx	glutamate-5-semialdehyde dehydrogenase, glyoxysome	0	0	0	0	0	0	0	0	0	1	NaN	0	0	0	0	0	1	NaN	0	0	0	0	0	0	0	0	0	0	1	NaN	0	0	0	0	0	1	NaN	0	0
44	1		0	0	[c] : arg-L + o2 + nadph --> no + citr-L + nadp + (2) h	Forward only	Arginine and proline metabolism	1.14.13.39	NOS	nitric-oxide synthase	0	0.0165242	4.92031e-05	1.9529e-05	0	0.0165242	6.73115e-05	0	2.91871e-05	8.69445e-107	0.0044124	0	0.0165242	4.17325e-05	0	1.42927e-05	8.49156e-71	0.32195	0	0	0.0301561	0.000104269	4.23885e-05	0	0.0301561	4.97595e-05	0	2.05449e-05	3.61093e-283	5.6098e-12	0	0.031885	0.00011407	0	4.78566e-05	3.37706e-20	0.561074	0	0
45	0		0	0	[c] : arg-L + o2 + nadph + h --> nwharg + nadp + h2o	Forward only	Arginine and proline metabolism	1.14.13.39	NOS1	L-Arginine,NADPH:oxygen oxidoreductase (N-(omega)-hydroxyarginine-forming)	0	0.0165242	9.35699e-06	4.14373e-06	0	0.0165242	1.19696e-05	0	4.00504e-06	3.60352e-07	0.400136	0	0.0165242	1.30604e-05	0	3.84249e-06	3.16225e-13	0.131454	0	0	0.0301561	2.08724e-05	6.97101e-06	0	0.0301561	9.92734e-05	1	4.54689e-05	0	4.1189e-29	0	0.0286965	1.41105e-05	-1	4.38637e-06	5.56246e-128	0.0318657	1	0
46	0		0	0	[c] : nadph + (2) nwharg + (2) o2 + h --> nadp + (2) no + (2) citr-L + (2) h2o	Forward only	Arginine and proline metabolism	1.14.13.39	NOS2	N-(omega)-Hydroxyarginine,NADPH:oxygen oxidoreductase (nitric-oxide-forming)	0	0.00826211	4.61734e-06	2.07186e-06	0	0.00826211	5.90306e-06	0	2.00252e-06	3.60352e-07	0.412528	0	0.00826211	6.44702e-06	0	1.92124e-06	3.16225e-13	0.138155	0	0	0.0150781	1.03976e-05	3.48551e-06	0	0.0150781	4.96361e-05	1	2.27345e-05	0	3.64708e-29	0	0.0143482	6.97629e-06	-1	2.19319e-06	5.56246e-128	0.0295279	1	0
47	0		0	0	[m] : orn + akg --> glu5sa + glu-L	Forward only	Arginine and proline metabolism	2.6.1.13	ORNTArm	L-Ornithine:2-oxo-acid aminotransferase	0	0.0330484	7.3805e-05	3.09366e-05	0	0.0330484	5.71586e-05	0	2.33778e-05	1.52001e-67	0.0590816	0	0.0330484	4.45417e-05	0	1.60525e-05	1.0065e-279	5.91138e-05	0	0	0.0603123	8.49788e-05	3.59389e-05	0	0.0603123	0.000157348	1	7.5366e-05	8.35196e-290	1.92514e-08	0	0.0956549	0.000162487	1	6.76255e-05	1.16946e-219	2.10374e-09	1	0
48	1		0	0	[c] : 1pyr5c + nadph + (2) h --> pro-L + nadp	Forward only	Arginine and proline metabolism	1.5.1.2	P5CR	pyrroline-5-carboxylate reductase	0.00284872	0.0358972	0.00286975	0.00285773	0.00284872	0.0358972	0.00286738	0	0.00285772	7.79995e-07	0.421492	0.00284872	0.0358972	0.00286873	0	0.0028572	3.03206e-05	1.04057	0	0.00512769	0.06544	0.00517958	0.00514706	0.00512769	0.06544	0.00517464	0	0.00514767	0.013259	0.647017	0.00473961	0.0457346	0.00477304	0	0.00475283	0	0	0	0.00327067
49	1		0	0	[m] : 1pyr5c + nadph + (2) h --> pro-L + nadp	Forward only	Arginine and proline metabolism	1.5.1.2	P5CRm	pyrroline-5-carboxylate reductase, mitochondria	0	4.5565	0.0550635	0.0261965	0	4.5565	0.0562649	0	0.0280156	0.000283516	1.16377	0	0.356657	0.000573309	0	0.000206093	0	2.46896e-176	0	0	5.92426	0.0748577	0.0343629	0	5.92426	0.0713384	0	0.0367431	0.00239091	0.75885	0	0.0717412	6.64361e-05	0	1.98331e-05	0	1.79483e-170	0	0
50	0		0	1	[c] : atp + pro-L + trnapro --> amp + ppi + protrna + h	Forward only	Arginine and proline metabolism	6.1.1.15	PROTL	proline---tRNA ligase	0.00284872	0.0193729	0.00285409	0.00285031	0.00284872	0.0193729	0.00285334	0	0.00285062	1.20127e-33	0.680569	0.00284872	0.0193729	0.00285328	0	0.00285047	8.87735e-26	0.582881	0	0.00512769	0.0352838	0.00513498	0.00513089	0.00512769	0.0352838	0.00514724	1	0.00513401	3.39149e-296	6.23303e-07	0.00473961	0.0525671	0.00475725	-1	0.0047448	0	0	1	0.00327067
51	1		0	0	[m] : 1pyr5c + nad + (2) h2o --> glu-L + nadh + h	Forward only	Arginine and proline metabolism	1.2.1.88	PCOR	(S)-1-pyrroline-5-carboxylate:NAD+ oxidoreductase	0	0.0330484	2.10197e-05	9.00725e-06	0	0.0330484	1.86446e-05	0	9.00538e-06	7.79995e-07	0.421492	0	0.0330484	1.99976e-05	0	8.4812e-06	3.03206e-05	1.04057	0	0	0.0603123	5.18789e-05	1.93657e-05	0	0.0603123	4.69424e-05	0	1.998e-05	0.013259	0.647017	0	0.040995	3.34244e-05	0	1.32247e-05	6.67186e-76	2.52617e-05	0	0
52	0		0	0	[c] : p3h5c + nadph + (2) h --> 4hpro-LT + nadp	Forward only	Arginine and proline metabolism	1.5.1.2	THPOR	Trans-4-Hydroxy-L-proline:NADP+ 5-oxidoreductase	0	0	0	0	0	0	0	0	0	1	NaN	0	0	0	0	0	1	NaN	0	0	0	0	0	0	0	0	0	0	1	NaN	0	0	0	0	0	1	NaN	0	0
53	0		0	0	[c] : p3h5c + nad + (2) h2o --> e4hg + nadh + h	Forward only	Arginine and proline metabolism	1.2.1.88	P3H5COR	L-1-pyrroline-3-hydroxy-5-carboxylate:NAD+ oxidoreductase	0	0	0	0	0	0	0	0	0	1	NaN	0	0	0	0	0	1	NaN	0	0	0	0	0	0	0	0	0	0	1	NaN	0	0	0	0	0	1	NaN	0	0
54	0		0	0	[c] : argtrna + h2o --> arg-L + trnaarg	Forward only	Arginine and proline metabolism	3.1.1.29	ARGTAH	arginine-tRNA aminoacylhydrolase	0	0.0165242	3.79784e-06	1.66777e-06	0	0.0165242	4.02001e-06	0	1.82399e-06	7.31814e-18	1.09725	0	0.0165242	3.99827e-06	0	1.7329e-06	1.15558e-07	1.08606	0	0	0.0301561	7.34307e-06	3.21444e-06	0	0.0301561	1.44226e-05	1	4.46093e-06	3.76959e-100	1.00452e-05	0	0.0478275	2.00856e-05	1	5.39324e-06	8.94209e-197	0.000128016	1	0
55	0		0	1	[c] : protrna + h2o --> pro-L + trnapro	Forward only	Arginine and proline metabolism	3.1.1.29	PROTAH	proline-tRNA aminoacylhydrolase	0	0.0165242	5.20919e-06	1.59537e-06	0	0.0165242	4.51788e-06	0	1.90014e-06	1.20127e-33	0.734208	0	0.0165242	4.45056e-06	0	1.75456e-06	8.87735e-26	0.628688	0	0	0.0301561	7.25008e-06	3.19741e-06	0	0.0301561	1.9511e-05	1	6.31647e-06	3.39149e-296	6.24266e-07	0	0.0478275	1.76177e-05	1	5.19349e-06	5.16453e-230	0.000599139	1	0
56	1		0	0	[c] : argsuc <==> fum + arg-L	Reversible	Arginine and proline metabolism;Urea cycle and metabolism of amino groups	4.3.2.1	ARGSL	argininosuccinate lyase	0.00905747	0.0255817	0.00913092	0.00909315	0.00905747	0.0255817	0.00915254	0	0.00910429	5.7377e-65	0.0014393	0.00905747	0.0255817	0.00913015	0	0.0090886	2.40272e-26	1.38883	0	0.0163034	0.0464596	0.0164548	0.016375	0.0163034	0.0464596	0.0164696	0	0.0163945	1.40097e-55	0.435783	0.0150695	0.062897	0.0152356	0	0.0151497	0	0	0	0.00590109
57	0		0	1	[c] : cbp + orn <==> pi + citr-L	Reversible	Arginine and proline metabolism;Urea cycle and metabolism of amino groups	2.1.3.3	OCT	ornithine carbamoyltransferase	0	0.0109295	2.85618e-05	1.18175e-05	0	0.0109295	2.76073e-05	0	1.03544e-05	1.08197e-10	1.25963	0	0.0109295	3.16511e-05	0	1.1837e-05	0.0956594	0.625237	0	0	0.0198381	5.07551e-05	2.13422e-05	0	0.0198381	8.63731e-05	1	3.60263e-05	9.71369e-131	1.84266e-08	0	0.0353596	0.000230858	1	9.71425e-05	0	2.17103e-63	1	0
58	0		0	0	[h] : cbp + orn <==> pi + citr-L	Reversible	Arginine and proline metabolism;Urea cycle and metabolism of amino groups	2.1.3.3	OCTh	ornithine carbamoyltransferase, chloroplast	0	0	0	0	0	0	0	0	0	1	NaN	0	0	0	0	0	1	NaN	0	0	0	0	0	0	0	0	0	0	1	NaN	0	0	0	0	0	1	NaN	0	0
59	0		0	1	[m] : cbp + orn <==> pi + citr-L	Reversible	Arginine and proline metabolism;Urea cycle and metabolism of amino groups	2.1.3.3	OCTm	ornithine carbamoyltransferase, mitochondrial	-0.00187201	0.0145655	0.00903555	0.00904857	-0.00187201	0.0145655	0.00903858	0	0.00905052	1.04733e-17	0.724997	-0.00187201	0.0145655	0.00903274	0	0.00904889	0.010252	0.741034	0	-0.00353464	0.0263555	0.0162661	0.0162881	-0.00353464	0.0263555	0.0162296	-1	0.0162741	2.95109e-118	6.24008e-08	-0.0202901	0.0223344	0.0148489	-1	0.0149789	0	0	1	-0.0216731
60	1		0	0	[c] : atp + citr-L + asp-L --> amp + ppi + argsuc + (2) h	Forward only	Arginine and proline metabolism;Urea cycle and metabolism of amino groups	6.3.4.5	ARGSS	argininosuccinate synthase	0.00905747	0.0255817	0.00913092	0.00909315	0.00905747	0.0255817	0.00915254	0	0.00910429	5.7377e-65	0.0014393	0.00905747	0.0255817	0.00913015	0	0.0090886	2.40272e-26	1.38883	0	0.0163034	0.0464596	0.0164548	0.016375	0.0163034	0.0464596	0.0164696	0	0.0163945	1.40097e-55	0.435783	0.0150695	0.062897	0.0152356	0	0.0151497	0	0	0	0.00590109
61	1		0	0	[c] : atp + glu-L --> adp + glu5p	Forward only	Arginine and proline metabolism;Urea cycle and metabolism of amino groups	2.7.2.11	GLU5K	glutamate 5-kinase	0.00284872	0.0358972	0.00286975	0.00285773	0.00284872	0.0358972	0.00286738	0	0.00285772	7.79995e-07	0.421492	0.00284872	0.0358972	0.00286873	0	0.0028572	3.03206e-05	1.04057	0	0.00512769	0.06544	0.00517958	0.00514706	0.00512769	0.06544	0.00517464	0	0.00514767	0.013259	0.647017	0.00473961	0.0457346	0.00477304	0	0.00475283	0	0	0	0.00327067
62	0		0	0	[c] : gdpmann <==> gdpgal	Reversible	Ascorbate and aldarate metabolism	5.1.3.18	GDPMANNE1	GDP-mannose 3,5-epimerase	-1000	1000	18.3122	0	-1000	1000	20.8162	0	0	0.289462	0.204328	-1000	1000	28.0121	0	0	0.00206222	7.06247e-10	0	-1000	1000	18.5947	0	-1000	1000	18.5338	0	0	0.983592	1.47193	-1000	1000	36.4147	0	0	8.47958e-12	3.83531e-25	0	-1000
63	0		0	0	[c] : gdpmann <==> gdpgul	Reversible	Ascorbate and aldarate metabolism	5.1.3.18	GDPMANNE2	GDP-mannose 3,5-epimerase	-1000	1000	385.302	425.761	-1000	1000	369.795	-1	406.5	0.00488913	0.0124285	-1000	1000	354.246	-1	373.348	2.0509e-07	7.38842e-09	1	-1000	1000	379.079	422.137	-1000	1000	374.283	0	420.269	0.100485	0.807173	-1000	1000	327.637	0	326.837	7.21659e-21	5.82008e-22	0	-1000
64	0		0	0	[c] : gdpgul <==> gdpgal	Reversible	Ascorbate and aldarate metabolism	5.1.3.18	GDPMANNE3	GDP-mannose 3,5-epimerase	-1000	1000	385.302	425.761	-1000	1000	369.795	-1	406.5	0.00488913	0.0124285	-1000	1000	354.246	-1	373.348	2.0509e-07	7.38842e-09	1	-1000	1000	379.079	422.137	-1000	1000	374.283	0	420.269	0.100485	0.807173	-1000	1000	327.637	0	326.837	7.21659e-21	5.82008e-22	0	-1000
65	0		0	0	[m] : nad + (2) ascb-L + h <==> nadh + (2) mdhascb	Reversible	Ascorbate and aldarate metabolism	1.6.5.4	ASCBOR4	NADH:monodehydroascorbate oxidoreductase	-4.34037	0	0	0	-4.34037	0	0	0	0	1	NaN	-3.87478	0	0	0	0	1	NaN	0	-5.32716	0	0	0	-5.32716	0	0	0	0	1	NaN	-5.41689	-5.70355e-28	0	0	0	1	NaN	0	-9.52945
66	0		0	0	[m] : (2) mdhascb <==> dhdascb + ascb-L + (2) h	Reversible	Ascorbate and aldarate metabolism	1.11.1.11	MDHASCBL	Monodehydroascorbate lyase	-4.34037	0	0	0	-4.34037	0	0	0	0	1	NaN	-3.87478	0	0	0	0	1	NaN	0	-5.32716	0	0	0	-5.32716	0	0	0	0	1	NaN	-5.41689	-5.70355e-28	0	0	0	1	NaN	0	-9.52945
67	1		0	0	[u] : o2 + (2) ascb-L --> (2) dhdascb + (2) h2o	Forward only	Ascorbate and aldarate metabolism	1.10.3.3	ASCBOR	L-ascorbate:oxygen oxidoreductase	0	0.0165425	6.8096e-05	3.66784e-05	0	0.0165425	7.51228e-05	0	4.27347e-05	2.52845e-38	0.38958	0	0.0165425	0.000113781	0	5.97611e-05	1.2615e-252	1.95222e-16	0	0	0.030189	0.000147585	7.47513e-05	0	0.030189	0.00015613	0	8.90817e-05	1.30003e-41	0.860001	0	0.0717716	0.000760397	0	0.000349097	0	2.43874e-87	0	0
68	1		0	0	[u] : dhdascb + (2) gthrd --> gthox + ascb-L	Forward only	Ascorbate and aldarate metabolism	1.8.5.1	GTHDHu	glutathione:dehydroascorbate oxidoreductase	0	0.0330484	0.000115884	4.76818e-05	0	0.0330484	0.000133031	0	6.18715e-05	6.08765e-43	0.249431	0	0.0330484	0.000221196	0	0.000103433	8.49085e-284	5.4794e-20	0	0	0.0603123	0.000263238	0.000104409	0	0.0603123	0.000272976	0	0.000132115	9.90811e-37	1.1584	0	0.143482	0.0015316	0	0.000688677	0	9.10867e-92	0	0
69	1		0	0	[c] : udpglcur + h2o --> udp + glcur + h	Forward only	Ascorbate and aldarate metabolism	2.4.1.17	UDPGLCURH	UDP-glucuronate glucuronohydrolase	0	0.0330484	1.79313e-05	5.29264e-06	0	0.0330484	1.74662e-05	0	5.59911e-06	2.75826e-05	1.45451	0	0.0330484	1.58045e-05	0	4.87332e-06	8.47958e-12	1.06673	0	0	0.0603123	3.80764e-05	9.83938e-06	0	0.0603123	5.36213e-05	0	1.57933e-05	9.41106e-108	0.260889	0	0.0478275	3.40262e-05	0	8.54355e-06	1.1422e-14	1.0263	0	0
70	0		1	0	[c] : gdpgal + pi --> gal1p + gdp + h	Forward only	Ascorbate and aldarate metabolism	2.7.7.69	GDPGALP	GDP-L-galactose phosphorylase	0	0.00867411	0.000651652	0.000424622	0	0.00867411	0.000765977	1	0.000518722	3.61437e-46	1.50861e-17	0	0.00867411	0.000446425	-1	0.000271669	2.10328e-128	1.27306e-70	1	0	0.0156769	0.00128243	0.000863773	0	0.0156769	0.00128075	0	0.000879696	0.0181221	1.45079	0	0.0142766	0.00109099	0	0.000726587	2.69737e-37	8.42579e-18	0	0
71	0		1	0	[c] : gal1p + h2o --> gal + pi	Forward only	Ascorbate and aldarate metabolism	3.1.3.93	GAL1PP	L-galactose-1-phosphate phosphohydrolase	1.99152e-30	0.0330484	0.000660758	0.000430217	0	0.0330484	0.000773884	1	0.00052601	2.01818e-46	1.14154e-16	0	0.0330484	0.000456711	-1	0.000278782	6.28257e-127	8.52148e-65	1	0	0.0603123	0.00130385	0.000881867	0	0.0603123	0.00130172	0	0.00089243	0.0245213	1.44334	0	0.106707	0.00112517	0	0.000755586	9.8638e-35	5.36966e-14	0	0
72	1		0	0	[c] : gal + nad --> galtl + nadh + h	Forward only	Ascorbate and aldarate metabolism	1.1.1.316	GALOR	L-galactose:NAD+ 1-oxidoreductase	0	0.00275404	8.44635e-06	2.57813e-06	0	0.00275404	7.87463e-06	0	2.81355e-06	4.29873e-13	1.06974	0	0.00275404	8.30704e-06	0	2.46507e-06	0.000549805	1.38688	0	0	0.00502602	1.3905e-05	4.96581e-06	0	0.00502602	1.4219e-05	0	5.57943e-06	4.09836e-16	1.37968	0	0.00322432	1.06127e-05	0	3.79928e-06	3.60311e-36	0.0347212	0	0
73	1		0	0	[m] : galtl + (2) ficytc --> ascb-L + (2) focytc + (3) h	Forward only	Ascorbate and aldarate metabolism	1.3.2.3	GALTLOR	L-Galactono-1,4-lactone:ferricytochrome-c oxidoreductase	0	0.00275404	8.44635e-06	2.57813e-06	0	0.00275404	7.87463e-06	0	2.81355e-06	4.29873e-13	1.06974	0	0.00275404	8.30704e-06	0	2.46507e-06	0.000549805	1.38688	0	0	0.00502602	1.3905e-05	4.96581e-06	0	0.00502602	1.4219e-05	0	5.57943e-06	4.09836e-16	1.37968	0	0.00322432	1.06127e-05	0	3.79928e-06	3.60311e-36	0.0347212	0	0
74	0		0	1	[m] : ascb-L + (2) ficytc --> dhdascb + (2) focytc + (2) h	Forward only	Ascorbate and aldarate metabolism	1.3.2.3	ASCBOR2	Ascorbate:ferricytochrome-c oxidoreductase	0	4.34037	0.0251488	0.0103061	0	4.34037	0.0213475	0	0.0103794	0.256978	0.0623323	0	3.87478	1.54496	0	1.5577	0	0	0	0	5.32716	0.0269271	0.0123266	0	5.32716	0.0341545	1	0.0152485	7.67958e-24	0.00145491	0	5.41689	2.7924	1	2.73362	0	0	1	0
75	1		0	0	[m] : ascb-L + h2o2 --> dhdascb + (2) h2o	Forward only	Ascorbate and aldarate metabolism	1.11.1.11	ASCBOR3	L-ascorbate:hydrogen-peroxide oxidoreductase	0	1.51214	0.000369156	0.00011061	0	1.51214	0.00047837	0	0.000225547	0	0.163534	0	0.240654	0.000197312	0	6.631e-05	3.00794e-170	0.00612494	0	0	1.85732	0.00104715	0.000361215	0	1.85732	0.00132827	0	0.000474747	8.61946e-54	0.334512	0	0.0753379	0.000122911	0	5.15912e-05	0	2.2639e-10	0	0
76	0		0	0	[c] : atp + h2o --> adp + pi + h	Forward only	ATP maintenance		ATPM_NGAM	Non-growth associated ATP maintenance	2.85	2.85	2.85	2.85	2.85	2.85	2.85	0	2.85	1	1.50377	2.85	2.85	2.85	0	2.85	1	1.50282	0	2.85	2.85	2.85	2.85	2.85	2.85	2.85	0	2.85	1	1.50661	2.85	2.85	2.85	0	2.85	1	1.50566	0	2.85
77	0		0	0	[h] : 5mta + sprm + h <==> ametam + spmd	Reversible	beta-Alanine metabolism	2.5.1.22;2.5.1.16	ASAPT	S-adenosylmethioninamine:spermidine 3-aminopropyltransferase	0	0	0	0	0	0	0	0	0	1	NaN	0	0	0	0	0	1	NaN	0	0	0	0	0	0	0	0	0	0	1	NaN	0	0	0	0	0	1	NaN	0	0
78	0		0	0	[m] : ppcoa + fad <==> fadh2 + prpncoa	Reversible	beta-Alanine metabolism	1.3.99.3	PPCOAOm	Propanoyl-CoA:(acceptor) 2,3-oxidoreductase	0	0	0	0	0	0	0	0	0	1	NaN	0	0	0	0	0	1	NaN	0	0	0	0	0	0	0	0	0	0	1	NaN	0	0	0	0	0	1	NaN	0	0
79	1		0	0	[m] : ala-B + akg <==> msa + glu-L	Reversible	beta-Alanine metabolism	2.6.1.19	BAOAT	beta-alanine:2-oxoglutarate aminotransferase	0	0.0165242	4.73056e-05	1.56531e-05	0	0.0165242	5.77305e-05	0	1.89256e-05	4.26154e-18	0.228976	0	0.0165242	5.20809e-05	0	1.7747e-05	9.32636e-10	0.762424	0	0	0.0301561	7.9686e-05	3.18496e-05	0	0.0301561	9.76616e-05	0	3.50688e-05	2.67203e-11	0.227999	0	0.0173918	7.82564e-05	0	2.93636e-05	3.07867e-11	1.32916	0	0
80	0		0	0	[h] : bamppald + nad + h2o --> ala-B + nadh + (2) h	Forward only	beta-Alanine metabolism	1.2.1.3	APOR	3-aminopropanal:NAD+ oxidoreductase	0	0	0	0	0	0	0	0	0	1	NaN	0	0	0	0	0	1	NaN	0	0	0	0	0	0	0	0	0	0	1	NaN	0	0	0	0	0	1	NaN	0	0
81	0		0	0	[c] : ans + h2o --> ala-B + NPmehis	Forward only	beta-Alanine metabolism	3.4.13.20	BADP	beta-Alanine dipeptidase	0	0	0	0	0	0	0	0	0	1	NaN	0	0	0	0	0	1	NaN	0	0	0	0	0	0	0	0	0	0	1	NaN	0	0	0	0	0	1	NaN	0	0
82	0		0	0	[c] : carn + h2o --> ala-B + his-L	Forward only	beta-Alanine metabolism	3.4.13.3	HIDP	Histidine dipeptidase	0	0.0330484	8.06936e-06	3.33265e-06	0	0.0330484	8.07752e-06	0	3.56456e-06	2.19775e-08	1.49818	0	0.0330484	9.20532e-06	0	3.26365e-06	5.30504e-05	0.706018	0	0	0.0603123	2.85669e-05	7.04608e-06	0	0.0603123	2.08041e-05	0	7.70387e-06	4.29873e-13	0.320144	0	0.0956549	4.46813e-05	0	1.11247e-05	2.254e-72	0.0259077	0	0
83	0		0	0	[h] : 13dampp + o2 + h2o --> bamppald + nh4 + h2o2	Forward only	beta-Alanine metabolism	1.4.3.21	PAO	primary-amine oxidase	0	0	0	0	0	0	0	0	0	1	NaN	0	0	0	0	0	1	NaN	0	0	0	0	0	0	0	0	0	0	1	NaN	0	0	0	0	0	1	NaN	0	0
84	0		0	0	[c] : atp + pant-R + ala-B --> amp + ppi + pnto-R + (2) h	Forward only	beta-Alanine metabolism	6.3.2.1	PBAL	pantoate---beta-alanine ligase	0	0	0	0	0	0	0	0	0	1	NaN	0	0	0	0	0	1	NaN	0	0	0	0	0	0	0	0	0	0	1	NaN	0	0	0	0	0	1	NaN	0	0
85	0		0	0	[c] : ala-B + his-L + atp --> carn + adp + pi + h	Forward only	beta-Alanine metabolism	3.4.13.3	HAL	L-histidine:beta-alanine ligase (ADP-forming)	0	0.0330484	8.06936e-06	3.33265e-06	0	0.0330484	8.07752e-06	0	3.56456e-06	2.19775e-08	1.49818	0	0.0330484	9.20532e-06	0	3.26365e-06	5.30504e-05	0.706018	0	0	0.0603123	2.85669e-05	7.04608e-06	0	0.0603123	2.08041e-05	0	7.70387e-06	4.29873e-13	0.320144	0	0.0956549	4.46813e-05	0	1.11247e-05	2.254e-72	0.0259077	0	0
86	0		0	0	[c] : 56dura + nadp <==> ura + nadph + h	Reversible	beta-Alanine metabolism;Pyrimidine metabolism	1.3.1.2	DHDH	dihydropyrimidine dehydrogenase (NADP+)	-0.0165242	0	0	0	-0.0165242	0	0	0	0	1	NaN	-0.0165242	0	0	0	0	1	NaN	0	-0.0301561	0	0	0	-0.0301561	0	0	0	0	1	NaN	-0.0173918	0	0	0	0	1	NaN	0	-0.0441216
87	1		0	0	[c] : 56dura + h2o <==> cala	Reversible	beta-Alanine metabolism;Pyrimidine metabolism	3.5.2.2	DHPD	dihydropyrimidinase	0	0.0165242	4.73056e-05	1.56531e-05	0	0.0165242	5.77305e-05	0	1.89256e-05	4.26154e-18	0.228976	0	0.0165242	5.20809e-05	0	1.7747e-05	9.32636e-10	0.762424	0	0	0.0301561	7.9686e-05	3.18496e-05	0	0.0301561	9.76616e-05	0	3.50688e-05	2.67203e-11	0.227999	0	0.0173918	7.82564e-05	0	2.93636e-05	3.07867e-11	1.32916	0	0
88	1		0	0	[c] : cala + h2o + h --> ala-B + co2 + nh4	Forward only	beta-Alanine metabolism;Pyrimidine metabolism	3.5.1.6	BUPN	beta-ureidopropionase	0	0.0165242	4.73056e-05	1.56531e-05	0	0.0165242	5.77305e-05	0	1.89256e-05	4.26154e-18	0.228976	0	0.0165242	5.20809e-05	0	1.7747e-05	9.32636e-10	0.762424	0	0	0.0301561	7.9686e-05	3.18496e-05	0	0.0301561	9.76616e-05	0	3.50688e-05	2.67203e-11	0.227999	0	0.0173918	7.82564e-05	0	2.93636e-05	3.07867e-11	1.32916	0	0
89	0		0	0	[c] : 44mzym + (3) nadph + (2) h + (3) o2 <==> 4mzym-int1 + (3) nadp + (4) h2o	Reversible	Biosynthesis of steroids	1.14.13.72	44MZYMMO	4,4-dimethyl-5alpha-cholesta-8,24-dien-3beta-ol monooxygenase	0	0	0	0	0	0	0	0	0	1	NaN	0	0	0	0	0	1	NaN	0	0	0	0	0	0	0	0	0	0	1	NaN	0	0	0	0	0	1	NaN	0	0
90	0		0	0	[c] : 44mctr + nadph + h <==> 44mzym + nadp	Reversible	Biosynthesis of steroids	1.3.1.70	44MZYMOR	4,4-dimethyl-5alpha-cholesta-8,24-dien-3beta-ol:NADP+ D14-oxidoreductase	0	0	0	0	0	0	0	0	0	1	NaN	0	0	0	0	0	1	NaN	0	0	0	0	0	0	0	0	0	0	1	NaN	0	0	0	0	0	1	NaN	0	0
91	0		0	0	[c] : 4mzym + nadph + (2) o2 + (2) h <==> zymst + for + nadp + (2) h2o	Reversible	Biosynthesis of steroids		4MZYMDM	4alpha-methylzymosterol demethylase	0	0	0	0	0	0	0	0	0	1	NaN	0	0	0	0	0	1	NaN	0	0	0	0	0	0	0	0	0	0	1	NaN	0	0	0	0	0	1	NaN	0	0
92	0		0	0	[c] : 4mzym-int2 + nadp + (2) h2o <==> 4mzym + nadph + h + o2	Reversible	Biosynthesis of steroids	1.1.1.270	4MZYMR	4alpha-methylzymosterol reductase	0	0	0	0	0	0	0	0	0	1	NaN	0	0	0	0	0	1	NaN	0	0	0	0	0	0	0	0	0	0	1	NaN	0	0	0	0	0	1	NaN	0	0
93	0		0	0	[c] : 25hvitd3 + o2 + nadph + h <==> cat + nadp + h2o	Reversible	Biosynthesis of steroids	1.14.13.13	CADMO	calcidiol 1-monooxygenase	0	0	0	0	0	0	0	0	0	1	NaN	0	0	0	0	0	1	NaN	0	0	0	0	0	0	0	0	0	0	1	NaN	0	0	0	0	0	1	NaN	0	0
94	0		0	0	[c] : vitd3 + fdxrd + o2 <==> 25hvitd3 + fdxox + h2o	Reversible	Biosynthesis of steroids	1.14.15.-	CADS	calcidiol synthase	0	0	0	0	0	0	0	0	0	1	NaN	0	0	0	0	0	1	NaN	0	0	0	0	0	0	0	0	0	0	1	NaN	0	0	0	0	0	1	NaN	0	0
95	0		0	0	[c] : Ssq23epx <==> cyart	Reversible	Biosynthesis of steroids	5.4.99.8	CAS	cycloartenol synthase	0	0	0	0	0	0	0	0	0	1	NaN	0	0	0	0	0	1	NaN	0	0	0	0	0	0	0	0	0	0	1	NaN	0	0	0	0	0	1	NaN	0	0
96	1		0	0	[h] : ctp + 2me4p <==> ppi + 4c2me	Reversible	Biosynthesis of steroids	2.7.7.60	CMS	2-C-methyl-D-erythritol 4-phosphate cytidylyltransferase	0.00281477	0.0050018	0.00282757	0.00281988	0.00281477	0.0050018	0.00282711	0	0.00281986	0.183603	1.16152	0.00281477	0.0050018	0.00282826	0	0.00282035	2.79928e-08	0.914879	0	0.00506659	0.00905784	0.00508864	0.00507687	0.00506659	0.00905784	0.0050896	0	0.00507706	0.000142488	1.07277	0.00468312	0.00722388	0.0046994	0	0.00469024	0	0	0	0.00561152
97	0		0	0	[c] : cyart + amet <==> menecyart + ahcys + h	Reversible	Biosynthesis of steroids	2.1.1.41	CYARTMT	cycloartenol 24-C-methyltransferase	0	0	0	0	0	0	0	0	0	1	NaN	0	0	0	0	0	1	NaN	0	0	0	0	0	0	0	0	0	0	1	NaN	0	0	0	0	0	1	NaN	0	0
98	0		0	0	[c] : cyeuol <==> obfool	Reversible	Biosynthesis of steroids	5.5.1.9	CYEUOLCYCI	cycloeucalenol cycloisomerase	0	0	0	0	0	0	0	0	0	1	NaN	0	0	0	0	0	1	NaN	0	0	0	0	0	0	0	0	0	0	1	NaN	0	0	0	0	0	1	NaN	0	0
99	0		0	0	[c] : menecyart + nadph + (2) o2 + (2) h <==> cyeuol + for + nadp + (2) h2o	Reversible	Biosynthesis of steroids		CYEUOLS	cycloeucalenol synthase	0	0	0	0	0	0	0	0	0	1	NaN	0	0	0	0	0	1	NaN	0	0	0	0	0	0	0	0	0	0	1	NaN	0	0	0	0	0	1	NaN	0	0
100	0		0	0	[c] : chlstol + fad <==> ddsmsterol + fadh2	Reversible	Biosynthesis of steroids		DDSMSTOLD	7-dehydrodesmosterol desaturase	0	0	0	0	0	0	0	0	0	1	NaN	0	0	0	0	0	1	NaN	0	0	0	0	0	0	0	0	0	0	1	NaN	0	0	0	0	0	1	NaN	0	0
101	0		0	0	[c] : ddsmsterol + fadh2 <==> dsmsterol + fad	Reversible	Biosynthesis of steroids		DSMSTOLD	desmosterol desaturase	0	0	0	0	0	0	0	0	0	1	NaN	0	0	0	0	0	1	NaN	0	0	0	0	0	0	0	0	0	0	1	NaN	0	0	0	0	0	1	NaN	0	0
102	1		0	0	[h] : dxyl5p + nadph + h <==> 2me4p + nadp	Reversible	Biosynthesis of steroids	1.1.1.267	DXRI	1-deoxy-D-xylulose-5-phosphate reductoisomerase	0.00281477	0.0050018	0.00282757	0.00281988	0.00281477	0.0050018	0.00282711	0	0.00281986	0.183603	1.16152	0.00281477	0.0050018	0.00282826	0	0.00282035	2.79928e-08	0.914879	0	0.00506659	0.00905784	0.00508864	0.00507687	0.00506659	0.00905784	0.0050896	0	0.00507706	0.000142488	1.07277	0.00468312	0.00722388	0.0046994	0	0.00469024	0	0	0	0.00561152
103	0		0	0	[h] : ggdp + (3) h + (3) nadph <==> pdp + (3) nadp	Reversible	Biosynthesis of steroids	1.3.1.-	GGDR	geranylgeranyl diphosphate reductase	0	0.000507619	0.000433012	0.000449651	0	0.000507619	0.000430155	-1	0.000446278	1.20196e-06	0.027467	0	0.000507619	0.000465176	1	0.00047923	0	3.27826e-243	1	0	0.000913714	0.00078287	0.000815905	0	0.000913714	0.000776647	-1	0.000809293	5.75792e-16	0.0036504	5.93525e-36	0.00084456	0.000799121	1	0.000816699	7.53437e-207	1.02766e-25	1	0
104	1		0	0	[h] : 2mecdp + protdt <==> h2mb4p + h2o + protds + h	Reversible	Biosynthesis of steroids	1.17.4.3	HDS	4-hydroxy-3-methylbut-2-en-1-yl diphosphate synthase	0.00281477	0.0050018	0.00282757	0.00281988	0.00281477	0.0050018	0.00282711	0	0.00281986	0.183603	1.16152	0.00281477	0.0050018	0.00282826	0	0.00282035	2.79928e-08	0.914879	0	0.00506659	0.00905784	0.00508864	0.00507687	0.00506659	0.00905784	0.0050896	0	0.00507706	0.000142488	1.07277	0.00468312	0.00722388	0.0046994	0	0.00469024	0	0	0	0.00561152
105	0		0	0	[c] : lanost + (3) o2 + (3) nadph + (2) h <==> 44mctr + for + (3) nadp + (4) h2o	Reversible	Biosynthesis of steroids	1.14.13.70	LNS14DM	lanosterol,NADPH:oxygen oxidoreductase (14-methyl cleaving)	0	0	0	0	0	0	0	0	0	1	NaN	0	0	0	0	0	1	NaN	0	0	0	0	0	0	0	0	0	0	1	NaN	0	0	0	0	0	1	NaN	0	0
106	0		0	0	[c] : Ssq23epx <==> lanost	Reversible	Biosynthesis of steroids	5.4.99.7	LS	lanosterol synthase	0	0	0	0	0	0	0	0	0	1	NaN	0	0	0	0	0	1	NaN	0	0	0	0	0	0	0	0	0	0	1	NaN	0	0	0	0	0	1	NaN	0	0
107	1		0	0	[h] : pcdme <==> 2mecdp + cmp	Reversible	Biosynthesis of steroids	4.6.1.12	MCS	2-C-methyl-D-erythritol 2,4-cyclodiphosphate synthase	0.00281477	0.0050018	0.00282757	0.00281988	0.00281477	0.0050018	0.00282711	0	0.00281986	0.183603	1.16152	0.00281477	0.0050018	0.00282826	0	0.00282035	2.79928e-08	0.914879	0	0.00506659	0.00905784	0.00508864	0.00507687	0.00506659	0.00905784	0.0050896	0	0.00507706	0.000142488	1.07277	0.00468312	0.00722388	0.0046994	0	0.00469024	0	0	0	0.00561152
108	0		0	0	[c] : mergtrol + nadph + h <==> mfecostrl + nadp	Reversible	Biosynthesis of steroids	1.3.1.70	MERGTROLR	4alpha-methyl-5alpha-ergosta-8,14,24(28)-trien-3beta-ol reductase	0	0	0	0	0	0	0	0	0	1	NaN	0	0	0	0	0	1	NaN	0	0	0	0	0	0	0	0	0	0	1	NaN	0	0	0	0	0	1	NaN	0	0
109	0		0	0	[h] : mpq + amet <==> dmpq + ahcys + h	Reversible	Biosynthesis of steroids	2.1.1.-	MPQMT	2-methyl-6-phytylquinol methyltransferase	0	0	0	0	0	0	0	0	0	1	NaN	0	0	0	0	0	1	NaN	0	0	0	0	0	0	0	0	0	0	1	NaN	0	0	0	0	0	1	NaN	0	0
110	0		0	0	[c] : sql + nadph + o2 + h <==> Ssq23epx + nadp + h2o	Reversible	Biosynthesis of steroids	1.14.99.7	SMO	squalene monooxygenase	0	0	0	0	0	0	0	0	0	1	NaN	0	0	0	0	0	1	NaN	0	0	0	0	0	0	0	0	0	0	1	NaN	0	0	0	0	0	1	NaN	0	0
111	0		0	0	[c] : 4mzym-int1 + nadp --> 4mzym-int2 + nadph + co2	Forward only	Biosynthesis of steroids	1.1.1.170	4MZYMCODH	4alpha-methylzymosterol-4-carboxylate 3-dehydrogenase (decarboxylating)	0	0	0	0	0	0	0	0	0	1	NaN	0	0	0	0	0	1	NaN	0	0	0	0	0	0	0	0	0	0	1	NaN	0	0	0	0	0	1	NaN	0	0
112	0		0	0	[c] : zymstnl --> lthstrl	Forward only	Biosynthesis of steroids	5.3.3.5	CHLSTD78I	5alpha-cholest-7-en-3beta-ol delta7-delta8-isomerase	0	0	0	0	0	0	0	0	0	1	NaN	0	0	0	0	0	1	NaN	0	0	0	0	0	0	0	0	0	0	1	NaN	0	0	0	0	0	1	NaN	0	0
113	0		0	0	[c] : zymst --> chlstol	Forward only	Biosynthesis of steroids	5.3.3.5	CHLSTI	delta8,24-cholestadien-3beta-ol delta7-delta8-isomerase	0	0	0	0	0	0	0	0	0	1	NaN	0	0	0	0	0	1	NaN	0	0	0	0	0	0	0	0	0	0	1	NaN	0	0	0	0	0	1	NaN	0	0
114	0		0	0	[c] : chlstol + nadph + h --> lthstrl + nadp	Forward only	Biosynthesis of steroids	1.3.1.72	CHLSTR	5alpha-cholesta-7,24-dien-3beta-ol D24-reductase	0	0	0	0	0	0	0	0	0	1	NaN	0	0	0	0	0	1	NaN	0	0	0	0	0	0	0	0	0	0	1	NaN	0	0	0	0	0	1	NaN	0	0
115	1		0	0	[h] : atp + 4c2me --> adp + pcdme + h	Forward only	Biosynthesis of steroids	2.7.1.148	CMK	4-(cytidine 5'-diphospho)-2-C-methyl-D-erythritol kinase	0.00281477	0.0050018	0.00282757	0.00281988	0.00281477	0.0050018	0.00282711	0	0.00281986	0.183603	1.16152	0.00281477	0.0050018	0.00282826	0	0.00282035	2.79928e-08	0.914879	0	0.00506659	0.00905784	0.00508864	0.00507687	0.00506659	0.00905784	0.0050896	0	0.00507706	0.000142488	1.07277	0.00468312	0.00722388	0.0046994	0	0.00469024	0	0	0	0.00561152
116	0		0	0	[c] : ddsmsterol + nadph + h --> 7dhchsterol + nadp	Forward only	Biosynthesis of steroids	1.3.1.72	DDSMSTOLR	7-dehydroesmosterol reductase	0	0	0	0	0	0	0	0	0	1	NaN	0	0	0	0	0	1	NaN	0	0	0	0	0	0	0	0	0	0	1	NaN	0	0	0	0	0	1	NaN	0	0
117	0		0	0	[c] : dsmsterol + h + nadph --> chsterol + nadp	Forward only	Biosynthesis of steroids	1.3.1.72	DSMSTOLR	desmosterol reductase	0	0	0	0	0	0	0	0	0	1	NaN	0	0	0	0	0	1	NaN	0	0	0	0	0	0	0	0	0	0	1	NaN	0	0	0	0	0	1	NaN	0	0
118	1		0	0	[h] : pyr + g3p + h --> dxyl5p + co2	Forward only	Biosynthesis of steroids	2.2.1.7	DXS	1-deoxy-D-xylulose-5-phosphate synthase	0.00281477	0.0050018	0.00282757	0.00281988	0.00281477	0.0050018	0.00282711	0	0.00281986	0.183603	1.16152	0.00281477	0.0050018	0.00282826	0	0.00282035	2.79928e-08	0.914879	0	0.00506659	0.00905784	0.00508864	0.00507687	0.00506659	0.00905784	0.0050896	0	0.00507706	0.000142488	1.07277	0.00468312	0.00722388	0.0046994	0	0.00469024	0	0	0	0.00561152
119	1		0	0	[c] : grdp + ipdp --> ppi + frdp	Forward only	Biosynthesis of steroids	2.5.1.10	FPPS	farnesyl pyrophosphate synthase	0	0.000932976	1.71248e-05	8.03585e-06	0	0.000932976	2.20006e-05	0	1.2086e-05	2.49411e-90	5.01745e-11	0	0.000932976	1.70346e-05	0	8.18318e-06	0.00455984	1.39222	0	0	0.00168534	3.57279e-05	1.92407e-05	0	0.00168534	3.86774e-05	0	2.16173e-05	3.21772e-10	0.0736743	0	0.00145309	5.01519e-05	0	2.7831e-05	2.14224e-91	3.31661e-26	0	0
120	1		0	0	[h] : grdp + ipdp --> ppi + frdp + h	Forward only	Biosynthesis of steroids	2.5.1.10	FPPSh	farnesyl pyrophosphate synthase, chloroplast	0	0.000946696	0.000687872	0.000696512	0	0.000946696	0.000682973	0	0.000692497	4.84317e-88	3.61792e-11	0	0.000946696	0.000686985	0	0.000695655	1.24321e-12	0.431056	0	0	0.00171012	0.00123148	0.00124782	0	0.00171012	0.00123038	0	0.0012466	0.000364543	0.841086	0	0.00145309	0.00112104	0	0.00114319	0	0	0	0
121	0		0	1	[h] : frdp + ipdp --> ppi + ggdp + h	Forward only	Biosynthesis of steroids	2.5.1.29	GGPS	geranylgeranyl diphosphate synthase	0.000703693	0.000946696	0.000705026	0.00070421	0.000703693	0.000946696	0.000704986	0	0.000704224	0.051356	1.23422	0.000703693	0.000946696	0.000704041	0	0.000703793	0	8.94303e-28	0	0.00126665	0.00171012	0.00126722	0.00126683	0.00126665	0.00171012	0.00126906	1	0.00126774	0	8.79708e-36	0.00117078	0.00145309	0.00117119	-1	0.00117091	0	0	1	0.00140288
122	1		0	0	[c] : dmpp + ipdp --> ppi + grdp	Forward only	Biosynthesis of steroids	2.5.1.29	GPPS	geranyl pyrophosphate synthase	0	0.000932976	1.93177e-05	9.42035e-06	0	0.000932976	1.85176e-05	0	1.0043e-05	0.00257285	0.55869	0	0.000932976	1.88457e-05	0	9.63302e-06	0.0571956	0.897892	0	0	0.00168534	4.1213e-05	2.2346e-05	0	0.00168534	4.07313e-05	0	2.21659e-05	0.417968	1.27167	0	0.00145309	5.06251e-05	0	2.87342e-05	3.65884e-45	3.88966e-11	0	0
123	1		0	0	[h] : dmpp + ipdp --> ppi + grdp + h	Forward only	Biosynthesis of steroids	2.5.1.29	GPPSh	geranyl pyrophosphate synthase, chloroplast	0	0.000946696	0.000685776	0.000695142	0	0.000946696	0.000686526	0	0.000694507	0.00841783	0.618678	0	0.000946696	0.00068633	0	0.000695071	0.208933	0.795976	0	0	0.00171012	0.00122788	0.00124615	0	0.00171012	0.00122846	0	0.00124624	0.462298	1.19804	0	0.00145309	0.00112196	0	0.00114337	0	0	0	0
124	0		0	0	[h] : pdp + hgentis --> mpq + ppi + co2	Forward only	Biosynthesis of steroids	2.5.1.117	HPT	homogentisate phytyltransferase	0	0	0	0	0	0	0	0	0	1	NaN	0	0	0	0	0	1	NaN	0	0	0	0	0	0	0	0	0	0	1	NaN	0	0	0	0	0	1	NaN	0	0
125	0		0	1	[c] : ipdp --> dmpp	Forward only	Biosynthesis of steroids	5.3.3.2	IDI	isopentenyl-diphosphate Delta-isomerase	0	0.000946696	0.000162876	0.000137285	0	0.000946696	0.000164135	0	0.000134937	0.0116683	0.983298	0	0.000946696	0.000175327	0	0.000147241	1.48847e-06	3.85917e-10	0	0	0.00171012	0.000296597	0.000243054	0	0.00171012	0.000288179	-1	0.000227713	0.000506834	0.049573	0	0.00145309	0.000304396	1	0.000259892	8.58602e-06	0.0453142	1	0
126	0		1	0	[h] : ipdp --> dmpp	Forward only	Biosynthesis of steroids	5.3.3.2	IDIh	isopentenyl-diphosphate Delta-isomerase, chloroplast	0	0.000946696	0.000389231	0.000388278	0	0.000946696	0.000140045	-1	0.000110111	0	0	0	0.000946696	0.000140803	-1	0.000111326	0	0	1	0	0.00171012	0.000248598	0.000192178	0	0.00171012	0.000253376	0	0.00019624	0.000467033	0.369886	0	0.00145309	0.000241852	0	0.000194037	0.000155503	0.0633185	0	0
127	0		1	0	[h] : h2mb4p + nadph + h --> ipdp + nadp + h2o	Forward only	Biosynthesis of steroids	1.17.1.2	IDS1	isopentenyl-diphosphate synthase	0.00211108	0.0050018	0.00267456	0.00269443	0.00211108	0.0050018	0.00242622	-1	0.00242491	0	0	0.00211108	0.0050018	0.00243919	-1	0.00244359	0	0	1	0.00379994	0.00905784	0.00436474	0.00437111	0.00379994	0.00905784	0.00436195	0	0.00436471	0.557456	0.998481	0.00351234	0.00722388	0.00407306	0	0.00408942	0	0	0	0.00420864
128	0		1	0	[h] : h2mb4p + nadph + h --> dmpp + nadp + h2o	Forward only	Biosynthesis of steroids	1.17.1.2	IDS2	dimethylallyl-diphosphate synthase	0	0.000946696	0.000153007	0.000128959	0	0.000946696	0.000400883	1	0.000401221	0	0	0	0.000946696	0.000389061	1	0.000384029	0	0	1	0	0.00171012	0.000723902	0.000716812	0	0.00171012	0.00072765	0	0.000724415	0.524911	0.775527	0	0.00145309	0.000626341	0	0.000608934	2.17028e-76	1.64829e-132	0	0
129	0		0	0	[c] : lthstrl + nadph + h + o2 --> 7dhchsterol + nadp + (2) h2o	Forward only	Biosynthesis of steroids	1.14.21.6	LTHSTRLOR	lathosterol, NADPH:oxygen 5-oxidoreductase	0	0	0	0	0	0	0	0	0	1	NaN	0	0	0	0	0	1	NaN	0	0	0	0	0	0	0	0	0	0	1	NaN	0	0	0	0	0	1	NaN	0	0
130	0		0	0	[c] : obfool + (3) o2 + (3) nadph + (2) h --> mergtrol + for + (3) nadp + (4) h2o	Forward only	Biosynthesis of steroids	1.14.13.70	OBFOOLOR	obtusifoliol,NADPH:oxygen oxidoreductase (14-methyl cleaving)	0	0	0	0	0	0	0	0	0	1	NaN	0	0	0	0	0	1	NaN	0	0	0	0	0	0	0	0	0	0	1	NaN	0	0	0	0	0	1	NaN	0	0
131	0		0	0	[c] : (2) frdp --> ppi + psqldp	Forward only	Biosynthesis of steroids	2.5.1.21	PSPPS	presqualene-diphosphate synthase	0	0	0	0	0	0	0	0	0	1	NaN	0	0	0	0	0	1	NaN	0	0	0	0	0	0	0	0	0	0	1	NaN	0	0	0	0	0	1	NaN	0	0
132	0		0	0	[c] : psqldp + nadph + h --> ppi + sql + nadp	Forward only	Biosynthesis of steroids	2.5.1.21	SS	squalene synthase	0	0	0	0	0	0	0	0	0	1	NaN	0	0	0	0	0	1	NaN	0	0	0	0	0	0	0	0	0	0	1	NaN	0	0	0	0	0	1	NaN	0	0
133	0		0	0	[h] : mpq --> dvite	Forward only	Biosynthesis of steroids		TCYD	tocopherol cyclase (delta)	0	0	0	0	0	0	0	0	0	1	NaN	0	0	0	0	0	1	NaN	0	0	0	0	0	0	0	0	0	0	1	NaN	0	0	0	0	0	1	NaN	0	0
134	0		0	0	[h] : dmpq --> yvite	Forward only	Biosynthesis of steroids		TCYG	tocopherol cyclase (gamma)	0	0	0	0	0	0	0	0	0	1	NaN	0	0	0	0	0	1	NaN	0	0	0	0	0	0	0	0	0	0	1	NaN	0	0	0	0	0	1	NaN	0	0
135	0		0	0	[h] : bvite + amet --> avite1 + ahcys + h	Forward only	Biosynthesis of steroids		TMTB	beta-tocopherol methyltransferase	0	0	0	0	0	0	0	0	0	1	NaN	0	0	0	0	0	1	NaN	0	0	0	0	0	0	0	0	0	0	1	NaN	0	0	0	0	0	1	NaN	0	0
136	0		0	0	[h] : dvite + amet --> bvite + ahcys + h	Forward only	Biosynthesis of steroids	2.1.1.95	TMTD	delta-tocopherol methyltransferase	0	0	0	0	0	0	0	0	0	1	NaN	0	0	0	0	0	1	NaN	0	0	0	0	0	0	0	0	0	0	1	NaN	0	0	0	0	0	1	NaN	0	0
137	0		0	0	[h] : amet + yvite --> ahcys + avite1 + h	Forward only	Biosynthesis of steroids	2.1.1.95	TMTG	gamma-tocopherol methyltransferase	0	0	0	0	0	0	0	0	0	1	NaN	0	0	0	0	0	1	NaN	0	0	0	0	0	0	0	0	0	0	1	NaN	0	0	0	0	0	1	NaN	0	0
138	0		0	0	[c] : 7dhchsterol + photon298 --> vitd3	Forward only	Biosynthesis of steroids		VITD3S	vitamin D3 synthesis (non-enzymatic, UV-light requiring)	0	0	0	0	0	0	0	0	0	1	NaN	0	0	0	0	0	1	NaN	0	0	0	0	0	0	0	0	0	0	1	NaN	0	0	0	0	0	1	NaN	0	0
139	0		0	0	[c] : zymst + nadph + h --> zymstnl + nadp	Forward only	Biosynthesis of steroids	1.3.1.72	ZYMSTR	zymosterol reductase	0	0	0	0	0	0	0	0	0	1	NaN	0	0	0	0	0	1	NaN	0	0	0	0	0	0	0	0	0	0	1	NaN	0	0	0	0	0	1	NaN	0	0
140	1		0	0	[h] : spp + hgentis + h --> msbq + ppi + co2	Forward only	Biosynthesis of steroids	2.5.1.117	HST	Homogentisate solanesyltransferase	0	0.000243003	1.06038e-06	0	0	0.000243003	1.02329e-06	0	0	0.32476	1.25963	0	0.000243003	1.13906e-06	0	0	7.76999e-06	0.910849	0	0	0.000443473	2.18245e-06	1.14199e-06	0	0.000443473	2.32074e-06	0	1.16337e-06	0.0782497	0.950593	0	0.000282307	1.45912e-06	0	0	3.60877e-87	1.41537e-05	0	0
141	1		0	0	[h] : msbq + amet --> pqa + ahcys + h	Forward only	Biosynthesis of steroids	2.1.1.295	MSBQMT	S-adenosyl-L-methionine:2-methyl-6-solanyl-1,4-benzoquinol C3-methyltransferase	0	0.000243003	1.06038e-06	0	0	0.000243003	1.02329e-06	0	0	0.32476	1.25963	0	0.000243003	1.13906e-06	0	0	7.76999e-06	0.910849	0	0	0.000443473	2.18245e-06	1.14199e-06	0	0.000443473	2.32074e-06	0	1.16337e-06	0.0782497	0.950593	0	0.000282307	1.45912e-06	0	0	3.60877e-87	1.41537e-05	0	0
142	0		0	0	[c] : 3oodcoa + nadph + h --> 3hodcoa + nadp	Forward only	Biosynthesis of unsaturated fatty acids	1.1.1.-;1.1.1.100	3OACOAR	3-oxoacyl-CoA reductase (18:0)	0	0.00427226	0.00345562	0.00345456	2.10735e-26	0.00427226	0.00349367	1	0.00349034	9.93203e-122	1.49184e-79	0	0.00427226	0.00338511	-1	0.00343578	2.59156e-206	3.32377e-115	1	2.37719e-27	0.00770338	0.00606332	0.00617319	0	0.00770338	0.0064127	1	0.00643367	0	0	2.28234e-28	0.00670882	0.00576962	-1	0.00584866	0	0	1	0
143	0		0	0	[c] : malcoa + pmtcoa --> 3oodcoa + coa + co2	Forward only	Biosynthesis of unsaturated fatty acids	2.3.1.-	3OACOAS	3-oxoacyl-CoA synthase (18:0)	0	0.00427226	0.00345562	0.00345456	2.13337e-26	0.00427226	0.00349367	1	0.00349034	9.93203e-122	1.49184e-79	0	0.00427226	0.00338511	-1	0.00343578	2.59156e-206	3.32377e-115	1	2.3774e-27	0.00770338	0.00606332	0.00617319	0	0.00770338	0.0064127	1	0.00643367	0	0	2.24871e-28	0.00670882	0.00576962	-1	0.00584866	0	0	1	0
144	1		0	0	[c] : stcoa + (2) focytb5 + o2 + (2) h --> ocdce9coa + (2) ficytb5 + (2) h2o	Forward only	Biosynthesis of unsaturated fatty acids	1.14.19.1	COA1819ZD9DS	stearoyl-CoA delta9-desaturase	0	0.00390361	0.00333794	0.00335665	0	0.00390361	0.00333546	0	0.00335203	1.06598e-42	0.365721	0	0.00390361	0.00320924	0	0.00329258	0	0	0	0	0.0070398	0.00583963	0.00601306	0	0.0070398	0.00599836	0	0.00603093	8.72500000000000e-321	9.59758e-228	0	0.00609546	0.00531798	0	0.00541002	0	0	0	0
145	0		0	0	[c] : 3hodcoa --> od2coa + h2o	Forward only	Biosynthesis of unsaturated fatty acids	4.2.1.-	ECOAH8	3-hydroxyacyl-CoA dehydratase (18:1(2E))	0	0.00427226	0.00345562	0.00345456	2.09576e-26	0.00427226	0.00349367	1	0.00349034	9.93203e-122	1.49184e-79	0	0.00427226	0.00338511	-1	0.00343578	2.59156e-206	3.32377e-115	1	2.38154e-27	0.00770338	0.00606332	0.00617319	0	0.00770338	0.0064127	1	0.00643367	0	0	2.28231e-28	0.00670882	0.00576962	-1	0.00584866	0	0	1	0
146	0		0	0	[c] : od2coa + nadph + h --> stcoa + nadp	Forward only	Biosynthesis of unsaturated fatty acids	1.3.1.-;1.3.1.38	ECOAR	trans-2-enoyl-CoA reductase (18:0) (NADPH)	0	0.00427226	0.00345562	0.00345456	2.10735e-26	0.00427226	0.00349367	1	0.00349034	9.93203e-122	1.49184e-79	0	0.00427226	0.00338511	-1	0.00343578	2.59156e-206	3.32377e-115	1	2.37719e-27	0.00770338	0.00606332	0.00617319	0	0.00770338	0.0064127	1	0.00643367	0	0	2.24869e-28	0.00670882	0.00576962	-1	0.00584866	0	0	1	0
147	0		0	0	[c] : pmtcoa + h2o --> coa + hdca + h	Forward only	Biosynthesis of unsaturated fatty acids	3.1.2.2	FACOAE160	palmitoyl-CoA hydrolase (16:0)	0	0.0194851	1.66149e-05	7.15858e-06	0	0.0194851	1.75273e-05	0	7.62983e-06	4.83763e-05	0.924155	0	0.0194851	2.31835e-05	0	9.87087e-06	1.61473e-53	1.0169e-05	0	0	0.0354856	3.94551e-05	1.67494e-05	0	0.0354856	3.85774e-05	0	1.86572e-05	1.45539e-07	1.27167	0	0.0529377	3.67738e-05	0	1.64199e-05	0.020477	0.47396	0	0
148	0		0	0	[c] : stcoa + h2o --> coa + ocdca + h	Forward only	Biosynthesis of unsaturated fatty acids	3.1.2.2	FACOAE180	stearoyl-CoA hydrolase	0	0.00399353	0.000117686	0.000105298	0	0.00399353	0.000158217	1	0.000144807	1.68698e-163	8.30651e-197	0	0.00399353	0.000175871	1	0.000168046	3.29667e-269	0	1	0	0.00720057	0.000223683	0.000200904	0	0.00720057	0.000414341	1	0.000425392	0	0	0	0.00655529	0.000451649	1	0.000475632	0	0	1	0
149	0		1	0	[c] : ocdce9coa + h2o --> coa + ocdce9a + h	Forward only	Biosynthesis of unsaturated fatty acids	3.1.2.2	FACOAE1819Z	fatty-acyl-CoA hydrolase (18:1(9Z))	0	0.0178517	3.19782e-06	1.34081e-06	0	0.0178517	4.31893e-06	1	2.08352e-06	4.58029e-142	0.000839762	0	0.0178517	5.39148e-06	1	1.76204e-06	2.66129e-50	8.7545e-05	1	0	0.0325457	1.00107e-05	3.73825e-06	0	0.0325457	7.91735e-06	0	3.21085e-06	2.06636e-16	0.0866945	0	0.0500362	1.41412e-05	0	4.29194e-06	4.08471e-12	0.0890053	0	0
150	1		0	0	[c] : lnlccoa + h2o --> coa + lnlc + h	Forward only	Biosynthesis of unsaturated fatty acids	3.1.2.2	FACOAE1829Z12Z	linoleoyl-CoA hydrolase (18:2(9Z,12Z))	0	0.0165242	3.73113e-06	0	0	0.0165242	1.62599e-06	0	0	7.14699e-26	9.10119e-05	0	0.0165242	4.91479e-06	0	1.65014e-06	4.75446e-271	0.669469	0	0	0.0301561	1.15752e-05	3.42708e-06	0	0.0301561	4.45508e-06	0	1.61985e-06	3.95000000000000e-322	0.00674059	0	0.0478275	1.56168e-05	0	5.00933e-06	1.77177e-98	0.237838	0	0
151	0		0	0	[c] : lnlncgcoa + h2o --> coa + lnlncg + h	Forward only	Biosynthesis of unsaturated fatty acids	3.1.2.2	FACOAE1836Z9Z12Z	gamma-Linolenoyl-CoA hydrolase (18:3(6Z,9Z,12Z))	0	0.0165242	6.92621e-06	1.71498e-06	0	0.0165242	3.88387e-06	0	1.75794e-06	2.65209e-55	0.0928818	0	0.0165242	5.02404e-06	0	1.68063e-06	1.20196e-06	0.325373	0	0	0.0301561	1.27833e-05	3.56986e-06	0	0.0301561	1.1355e-05	0	3.7597e-06	1.27587e-19	1.16297	0	0.0478275	2.86754e-05	0	6.01204e-06	8.52251e-124	0.00486439	0	0
152	0		0	0	[c] : lnlncacoa + h2o --> coa + lnlnca + h	Forward only	Biosynthesis of unsaturated fatty acids	3.1.2.2	FACOAE1839Z12Z15Z	alpha-Linolenoyl-CoA hydrolase (18:3(9Z,12Z,15Z))	0	0.0165242	4.84146e-06	1.6136e-06	0	0.0165242	4.82418e-06	0	1.78307e-06	5.98393e-20	1.49818	0	0.0165242	4.65157e-06	0	1.62047e-06	2.81185e-10	1.40331	0	0	0.0301561	1.22445e-05	2.93108e-06	0	0.0301561	1.11499e-05	0	3.48089e-06	5.98393e-20	1.25735	0	0.0478275	1.76288e-05	0	5.49045e-06	1.70014e-259	0.345615	0	0
153	0		0	0	[c] : lnlccoa + nadh + o2 + h --> lnlncgcoa + nad + (2) h2o	Forward only	Biosynthesis of unsaturated fatty acids	1.14.19.3	LNLCCOAOR	Linoleoyl-CoA, hydrogen-donor:oxygen oxidoreductase	0	0	0	0	0	0	0	0	0	1	NaN	0	0	0	0	0	1	NaN	0	0	0	0	0	0	0	0	0	0	1	NaN	0	0	0	0	0	1	NaN	0	0
154	0		0	0	[m] : 8aonn + amet + h <==> amob + dann	Reversible	Biotin metabolism	2.6.1.62	AMAOTr	adenosylmethionine-8-amino-7-oxononanoate transaminase	3.81231e-08	3.81231e-08	0	0	3.81231e-08	3.81231e-08	0	0	0	1	NaN	3.81231e-08	3.81231e-08	0	0	0	1	NaN	0	6.86216e-08	6.86216e-08	0	0	6.86216e-08	6.86216e-08	0	0	0	1	NaN	6.34279e-08	6.34279e-08	0	0	0	1	NaN	0	1.26016e-07
155	0		0	0	[m] : amet + malcoa --> ahcys + malcoame + h	Forward only	Biotin metabolism	2.1.1.197	MALCOAMT	Malonyl-CoA methyltransferase	3.81231e-08	3.81231e-08	0	0	3.81231e-08	3.81231e-08	0	0	0	1	NaN	3.81231e-08	3.81231e-08	0	0	0	1	NaN	0	6.86216e-08	6.86216e-08	0	0	6.86216e-08	6.86216e-08	0	0	0	1	NaN	6.34279e-08	6.34279e-08	0	0	0	1	NaN	0	1.26016e-07
156	0		0	0	[m] : malACP + malcoame --> co2 + coa + ogmeACP + h	Forward only	Biotin metabolism	2.3.1.179	OGMEACPS	3-Oxo-glutaryl-[ACP] methyl ester synthase	3.81231e-08	3.81231e-08	0	0	3.81231e-08	3.81231e-08	0	0	0	1	NaN	3.81231e-08	3.81231e-08	0	0	0	1	NaN	0	6.86216e-08	6.86216e-08	0	0	6.86216e-08	6.86216e-08	0	0	0	1	NaN	6.34279e-08	6.34279e-08	0	0	0	1	NaN	0	1.26016e-07
157	0		0	0	[m] : h + nadph + ogmeACP --> hgmeACP + nadp	Forward only	Biotin metabolism	1.1.1.100	OGMEACPR	3-Oxo-glutaryl-[ACP] methyl ester reductase	3.81231e-08	3.81231e-08	0	0	3.81231e-08	3.81231e-08	0	0	0	1	NaN	3.81231e-08	3.81231e-08	0	0	0	1	NaN	0	6.86216e-08	6.86216e-08	0	0	6.86216e-08	6.86216e-08	0	0	0	1	NaN	6.34279e-08	6.34279e-08	0	0	0	1	NaN	0	1.26016e-07
158	0		0	0	[m] : hgmeACP --> egmeACP + h2o	Forward only	Biotin metabolism	4.2.1.59	OGMEACPD	3-Oxo-glutaryl-[ACP] methyl ester dehydratase	3.81231e-08	3.81231e-08	0	0	3.81231e-08	3.81231e-08	0	0	0	1	NaN	3.81231e-08	3.81231e-08	0	0	0	1	NaN	0	6.86216e-08	6.86216e-08	0	0	6.86216e-08	6.86216e-08	0	0	0	1	NaN	6.34279e-08	6.34279e-08	0	0	0	1	NaN	0	1.26016e-07
159	0		0	0	[m] : egmeACP + h + nadph --> gmeACP + nadp	Forward only	Biotin metabolism	1.3.1.10	EGMEACPR	Enoylglutaryl-[ACP] methyl ester reductase	3.81231e-08	3.81231e-08	0	0	3.81231e-08	3.81231e-08	0	0	0	1	NaN	3.81231e-08	3.81231e-08	0	0	0	1	NaN	0	6.86216e-08	6.86216e-08	0	0	6.86216e-08	6.86216e-08	0	0	0	1	NaN	6.34279e-08	6.34279e-08	0	0	0	1	NaN	0	1.26016e-07
160	0		0	0	[m] : gmeACP + malACP --> ACP + co2 + opmeACP	Forward only	Biotin metabolism	2.3.1.41	OPMEACPS	3-Oxo-pimeloyl-[ACP] methyl ester synthase	3.81231e-08	3.81231e-08	0	0	3.81231e-08	3.81231e-08	0	0	0	1	NaN	3.81231e-08	3.81231e-08	0	0	0	1	NaN	0	6.86216e-08	6.86216e-08	0	0	6.86216e-08	6.86216e-08	0	0	0	1	NaN	6.34279e-08	6.34279e-08	0	0	0	1	NaN	0	1.26016e-07
161	0		0	0	[m] : h + nadph + opmeACP --> hpmeACP + nadp	Forward only	Biotin metabolism	1.1.1.100	OPMEACPR	3-Oxo-pimeloyl-[ACP] methyl ester reductase	3.81231e-08	3.81231e-08	0	0	3.81231e-08	3.81231e-08	0	0	0	1	NaN	3.81231e-08	3.81231e-08	0	0	0	1	NaN	0	6.86216e-08	6.86216e-08	0	0	6.86216e-08	6.86216e-08	0	0	0	1	NaN	6.34279e-08	6.34279e-08	0	0	0	1	NaN	0	1.26016e-07
162	0		0	0	[m] : hpmeACP --> epmeACP + h2o	Forward only	Biotin metabolism	4.2.1.59	OPMEACPD	3-Oxo-pimeloyl-[ACP] methyl ester dehydratase	3.81231e-08	3.81231e-08	0	0	3.81231e-08	3.81231e-08	0	0	0	1	NaN	3.81231e-08	3.81231e-08	0	0	0	1	NaN	0	6.86216e-08	6.86216e-08	0	0	6.86216e-08	6.86216e-08	0	0	0	1	NaN	6.34279e-08	6.34279e-08	0	0	0	1	NaN	0	1.26016e-07
163	0		0	0	[m] : epmeACP + h + nadph --> nadp + pmeACP	Forward only	Biotin metabolism	1.3.1.10	EPMEACPR	Enoylpimeloyl-[ACP] methyl ester reductase	3.81231e-08	3.81231e-08	0	0	3.81231e-08	3.81231e-08	0	0	0	1	NaN	3.81231e-08	3.81231e-08	0	0	0	1	NaN	0	6.86216e-08	6.86216e-08	0	0	6.86216e-08	6.86216e-08	0	0	0	1	NaN	6.34279e-08	6.34279e-08	0	0	0	1	NaN	0	1.26016e-07
164	0		0	0	[m] : h2o + pmeACP --> meoh + pimACP	Forward only	Biotin metabolism	3.1.1.85	PMEACPE	Pimeloyl-[ACP] methyl ester esterase	3.81231e-08	3.81231e-08	0	0	3.81231e-08	3.81231e-08	0	0	0	1	NaN	3.81231e-08	3.81231e-08	0	0	0	1	NaN	0	6.86216e-08	6.86216e-08	0	0	6.86216e-08	6.86216e-08	0	0	0	1	NaN	6.34279e-08	6.34279e-08	0	0	0	1	NaN	0	1.26016e-07
165	0		0	0	[m] : ala-L + pimACP --> 8aonn + ACP + co2	Forward only	Biotin metabolism	2.3.1.47	AOXSr2	8-amino-7-oxononanoate synthase	3.81231e-08	3.81231e-08	0	0	3.81231e-08	3.81231e-08	0	0	0	1	NaN	3.81231e-08	3.81231e-08	0	0	0	1	NaN	0	6.86216e-08	6.86216e-08	0	0	6.86216e-08	6.86216e-08	0	0	0	1	NaN	6.34279e-08	6.34279e-08	0	0	0	1	NaN	0	1.26016e-07
166	0		0	0	[m] : atp + co2 + dann --> adp + dtbt + (3) h + pi	Forward only	Biotin metabolism	6.3.3.3	DBTS	dethiobiotin synthase	3.81231e-08	3.81231e-08	0	0	3.81231e-08	3.81231e-08	0	0	0	1	NaN	3.81231e-08	3.81231e-08	0	0	0	1	NaN	0	6.86216e-08	6.86216e-08	0	0	6.86216e-08	6.86216e-08	0	0	0	1	NaN	6.34279e-08	6.34279e-08	0	0	0	1	NaN	0	1.26016e-07
167	0		0	0	[m] : s + amet + dtbt --> btn + dad-5 + h + met-L	Forward only	Biotin metabolism	2.8.1.6	BTS5	Biotin synthase	3.81231e-08	3.81231e-08	0	0	3.81231e-08	3.81231e-08	0	0	0	1	NaN	3.81231e-08	3.81231e-08	0	0	0	1	NaN	0	6.86216e-08	6.86216e-08	0	0	6.86216e-08	6.86216e-08	0	0	0	1	NaN	6.34279e-08	6.34279e-08	0	0	0	1	NaN	0	1.26016e-07
168	0		0	0	[h] : atp + btn + h --> ppi + btnamp	Forward only	Biotin metabolism	6.2.1.11;6.3.4.9;6.3.4.10;6.3.4.11;6.3.4.15	BTNL	biotin:CoA ligase (AMP-forming)	0	0	0	0	0	0	0	0	0	1	NaN	0	0	0	0	0	1	NaN	0	0	0	0	0	0	0	0	0	0	1	NaN	0	0	0	0	0	1	NaN	0	0
169	0		0	0	[h] : btnamp + apoCCP --> btnCCP + amp + h	Forward only	Biotin metabolism	6.2.1.11;6.3.4.9;6.3.4.10;6.3.4.11;6.3.4.15	BTNL2	biotin:CoA ligase (AMP-forming)	0	0	0	0	0	0	0	0	0	1	NaN	0	0	0	0	0	1	NaN	0	0	0	0	0	0	0	0	0	0	1	NaN	0	0	0	0	0	1	NaN	0	0
170	0		0	0	[m] : atp + btn + h --> ppi + btnamp	Forward only	Biotin metabolism	6.2.1.11;6.3.4.9;6.3.4.10;6.3.4.11;6.3.4.15	BTNLm	biotin:CoA ligase (AMP-forming)	0	0	0	0	0	0	0	0	0	1	NaN	0	0	0	0	0	1	NaN	0	0	0	0	0	0	0	0	0	0	1	NaN	0	0	0	0	0	1	NaN	0	0
171	0		0	0	[m] : btnamp + apoCCP --> btnCCP + amp + h	Forward only	Biotin metabolism	6.2.1.11;6.3.4.9;6.3.4.10;6.3.4.11;6.3.4.15	BTNLm2	biotin:CoA ligase (AMP-forming)	0	0	0	0	0	0	0	0	0	1	NaN	0	0	0	0	0	1	NaN	0	0	0	0	0	0	0	0	0	0	1	NaN	0	0	0	0	0	1	NaN	0	0
172	0		0	0	[c] : btcoa + ac <==> but + accoa	Reversible	Butanoate metabolism	2.8.3.8	BCACT	butanoyl-CoA:acetate CoA transferase	0.000481561	0.000481561	0.000481561	0.000481561	0.000481561	0.000481561	0.000481561	1	0.000481561	0	0	0.000481561	0.000481561	0.000481561	1	0.000481561	0	0	1	0.00086681	0.00086681	0.00086681	0.00086681	0.00086681	0.00086681	0.00086681	1	0.00086681	5.74459e-06	0.0132346	0.000801206	0.000801206	0.000801206	-1	0.000801206	0	0	1	0.0015918
173	0		0	0	[c] : btcoa + nad <==> b2coa + nadh + h	Reversible	Butanoate metabolism	1.3.99.2	BCOR	butanoyl-CoA:(acceptor) 2,3-oxidoreductase	-0.0405114	-0.00510235	0	0	-0.0405114	-0.00510235	0	0	0	1	NaN	-0.0405114	-0.00510235	0	0	0	1	NaN	0	-0.0737456	-0.00912529	0	0	-0.0737456	-0.00912529	0	0	0	1	NaN	-0.0213843	1.0094e-05	0	0	0	1	NaN	0	-0.134973
174	0		0	1	[c] : 3hbcoa <==> b2coa + h2o	Reversible	Butanoate metabolism	4.2.1.17;5.3.3.8	HBCHL	3-Hydroxybutanoyl-CoA hydro-lyase	0.00510235	0.0405114	0.00887393	0.00818043	0.00510235	0.0405114	0.00897839	0	0.00830477	3.04051e-17	0.0732106	0.00510235	0.0405114	0.00815826	0	0.00775961	0	2.1415e-73	0	0.00912529	0.0737456	0.0158518	0.0147153	0.00912529	0.0737456	0.0192463	1	0.0153054	8.03739e-270	1.07145e-167	-1.0094e-05	0.0213843	0.0122604	-1	0.012346	0	0	1	0.0167899
175	0		0	0	[m] : 3hbcoa <==> b2coa + h2o	Reversible	Butanoate metabolism	4.2.1.17;5.3.3.8	HBCHLm	3-Hydroxybutanoyl-CoA hydro-lyase, mitochondria	0	0	0	0	0	0	0	0	0	1	NaN	0	0	0	0	0	1	NaN	0	0	0	0	0	0	0	0	0	0	1	NaN	0	0	0	0	0	1	NaN	0	0
176	0		0	0	[c] : 3hbcoa-R <==> b2coa + h2o	Reversible	Butanoate metabolism	4.2.1.55	HBCHLR	(3R)-3-Hydroxybutanoyl-CoA hydro-lyase	0	0	0	0	0	0	0	0	0	1	NaN	0	0	0	0	0	1	NaN	0	0	0	0	0	0	0	0	0	0	1	NaN	0	0	0	0	0	1	NaN	0	0
177	0		0	0	[c] : aacoa + nadph + h <==> 3hbcoa + nadp	Reversible	Butanoate metabolism	1.1.1.157	HBCO_nadp	3-Hydroxybutanoyl-CoA:NADP+ oxidoreductase	0.00510235	1000	264.596	228.977	0.00510235	1000	266.56	0	228.739	0.0347845	0.956811	0.00510235	1000	286.741	0	253.328	4.20859e-10	3.7359e-14	0	0.00912529	1000	266.823	226.034	0.00912529	1000	269.953	0	223.058	0.00561398	0.640475	-1.0094e-05	1000	300.488	0	268.161	1.92972e-26	5.65619e-30	0	0.0167899
178	0		0	0	[m] : aacoa + nadph + h <==> 3hbcoa + nadp	Reversible	Butanoate metabolism	1.1.1.157	HBCO_nadp_m	3-Hydroxybutanoyl-CoA:NADP+ oxidoreductase, mitochondria	0	999.969	684.51	714.341	0	999.969	318.338	-1	291.267	0	0	0	999.969	335.672	-1	308.408	0	0	1	0	999.944	323.275	293.266	0	999.944	323.583	0	294.036	0.267496	1.43468	0	1000	356.362	0	336.113	4.32351e-17	3.79581e-26	0	0
179	0		0	0	[m] : bhb + nad <==> acac + nadh + h	Reversible	Butanoate metabolism	1.1.1.30	HBNOm	3-Hydroxybutanoate:NAD+ oxidoreductase, mitochondria	-0.00550807	0	0	0	-0.00550807	0	0	0	0	1	NaN	-0.00550807	0	0	0	0	1	NaN	0	-0.010052	0	0	0	-0.010052	0	0	0	0	1	NaN	-0.00503447	0	0	0	0	1	NaN	0	-0.0220608
180	0		0	0	[x] : bhb + nad <==> acac + nadh + h	Reversible	Butanoate metabolism	1.1.1.30	HBNOx	3-Hydroxybutanoate:NAD+ oxidoreductase, glyoxysome	-0.00550807	0	0	0	-0.00550807	0	0	0	0	1	NaN	-0.00550807	0	0	0	0	1	NaN	0	-0.010052	0	0	0	-0.010052	0	0	0	0	1	NaN	-0.00503447	0	0	0	0	1	NaN	0	-0.0220608
181	0		0	0	[h] : 2ahethmpp + pyr --> alac-S + thmpp	Forward only	Butanoate metabolism	2.2.1.6	APLh	2-Acetolactate pyruvate-lyase (carboxylating), chloroplast	0	0.0140672	0.000361688	0.000196229	0	0.0140672	0.000422845	1	0.000246096	2.15242e-36	1.69024e-07	0	0.0140672	0.000488965	1	0.000279415	6.3787e-85	2.41177e-27	1	0	0.0254585	0.000665706	0.000366124	0	0.0254585	0.000749326	1	0.000447925	1.66261e-36	0.000275159	0	0.0250388	0.00127245	1	0.000816105	0	5.1769e-143	1	0
182	1		0	0	[m] : 2ahethmpp + pyr --> alac-S + thmpp	Forward only	Butanoate metabolism	2.2.1.6	APLm	2-Acetolactate pyruvate-lyase (carboxylating), mitochondria	0	0.0168806	0.00238357	0.00208958	0	0.0168806	0.00241782	0	0.00212399	0.000888384	0.402683	0	0.0168806	0.00248827	0	0.00217135	0.00561398	8.29569e-05	0	0	0.0305501	0.00440635	0.00379919	0	0.0305501	0.00448972	0	0.00394842	0.00643594	0.190768	0	0.0250388	0.00402154	0	0.00354784	1.45742e-13	1.36112e-18	0	0
183	0		0	0	[c] : btal + coa + nad --> btcoa + nadh + h	Forward only	Butanoate metabolism	1.2.1.10	BNOR	butanal:NAD+ oxidoreductase (CoA-acylating)	0	0	0	0	0	0	0	0	0	1	NaN	0	0	0	0	0	1	NaN	0	0	0	0	0	0	0	0	0	0	1	NaN	0	0	0	0	0	1	NaN	0	0
184	0		0	0	[h] : btal + coa + nad --> btcoa + nadh + h	Forward only	Butanoate metabolism	1.2.1.10	BNORh	butanal:NAD+ oxidoreductase (CoA-acylating), chloroplast	0	0	0	0	0	0	0	0	0	1	NaN	0	0	0	0	0	1	NaN	0	0	0	0	0	0	0	0	0	0	1	NaN	0	0	0	0	0	1	NaN	0	0
185	0		0	0	[c] : btal + nadh + h --> 1btol + nad	Forward only	Butanoate metabolism	1.1.1.-	BTS	butanol synthase	0	0	0	0	0	0	0	0	0	1	NaN	0	0	0	0	0	1	NaN	0	0	0	0	0	0	0	0	0	0	1	NaN	0	0	0	0	0	1	NaN	0	0
186	0		0	0	[c] : btal + nadph + h --> 1btol + nadp	Forward only	Butanoate metabolism	1.1.1.-	BTS_nadph	butanol synthase (NADPH)	0	0	0	0	0	0	0	0	0	1	NaN	0	0	0	0	0	1	NaN	0	0	0	0	0	0	0	0	0	0	1	NaN	0	0	0	0	0	1	NaN	0	0
187	0		0	0	[c] : 3hbcoa + nad --> aacoa + nadh + h	Forward only	Butanoate metabolism	4.2.1.17;5.3.3.8	HBCO	3-Hydroxybutanoyl-CoA:NAD+ oxidoreductase	0	999.995	264.587	228.969	0	999.995	266.551	0	228.73	0.0347845	0.956811	0	999.995	286.733	0	253.32	4.20859e-10	3.7345e-14	0	0	999.991	266.807	226.012	0	999.991	269.934	0	223.044	0.00561398	0.641087	0	1000	300.476	0	268.149	1.92972e-26	5.58451e-30	0	0
188	0		0	0	[m] : 3hbcoa + nad --> aacoa + nadh + h	Forward only	Butanoate metabolism	4.2.1.17;5.3.3.8	HBCOm	3-Hydroxybutanoyl-CoA:NAD+ oxidoreductase, mitochondria	0	999.969	684.51	714.341	0	999.969	318.338	-1	291.267	0	0	0	999.969	335.672	-1	308.408	0	0	1	0	999.944	323.275	293.266	0	999.944	323.583	0	294.036	0.267496	1.43468	0	1000	356.362	0	336.113	4.32351e-17	3.79581e-26	0	0
189	0		0	0	[h] : sucsal + nad + h2o --> succ + nadh + (2) h	Forward only	Butanoate metabolism	1.2.1.24	SSNOh	succinate-semialdehyde:NAD+ oxidoreductase, chloroplast	0	0	0	0	0	0	0	0	0	1	NaN	0	0	0	0	0	1	NaN	0	0	0	0	0	0	0	0	0	0	1	NaN	0	0	0	0	0	1	NaN	0	0
190	1		0	0	[m] : sucsal + nad + h2o --> succ + nadh + (2) h	Forward only	Butanoate metabolism	1.2.1.24	SSNOm	succinate-semialdehyde:NAD+ oxidoreductase, mitochondria	0	0.0110161	2.38166e-05	9.26354e-06	0	0.0110161	4.00985e-05	0	1.72668e-05	5.65534e-281	1.6929e-06	0	0.0110161	2.85783e-05	0	1.01143e-05	6.21384e-11	0.25124	0	0	0.0201041	4.58344e-05	1.86893e-05	0	0.0201041	5.26672e-05	0	2.53085e-05	2.16184e-67	0.413696	0	0.0147161	3.49725e-05	0	1.38718e-05	1.26635e-63	0.0200825	0	0
191	0		0	0	[c] : (2) udpg + h2o --> (2) udp + callose + (2) h	Forward only	Callose biosynthesis	2.4.1.34	CALLOSES	Callose synthase	0	0.00137702	2.51044e-07	0	0	0.00137702	3.92617e-07	0	0	0.000201639	0.539523	0	0.00137702	2.9701e-07	0	0	0.987078	1.20568	0	0	0.00251301	8.30802e-07	0	0	0.00251301	6.0206e-07	0	0	0.0160123	0.856087	0	0.00154282	4.92382e-07	0	0	0.0181221	0.2556	0	0
192	0		0	0	[f] : (2) udpg + h2o --> (2) udp + callose + (2) h	Forward only	Callose biosynthesis	2.4.1.34	CALLOSESf	Callose synthase	0	0	0	0	0	0	0	0	0	1	NaN	0	0	0	0	0	1	NaN	0	0	0	0	0	0	0	0	0	0	1	NaN	0	0	0	0	0	1	NaN	0	0
193	0		0	1	[c] : akg + ala-L <==> glu-L + pyr	Reversible	Carbon fixation	2.6.1.2	ALAAT	alanine aminotransferase	-1000	1000	138.364	94.1566	-1000	1000	143.227	0	99.869	0.0865876	0.280036	-1000	1000	437.471	0	459.875	0	0	0	-1000	1000	145.593	95.9039	-1000	1000	26.2227	-1	0	0	0	-999.959	1000	53.5284	-1	0	0	2.7058e-243	1	-1000
194	0		0	0	[c] : h + hco3 <==> co2 + h2o	Reversible	Carbon fixation	4.2.1.1	HCO3E	carbonic anhydrase	-1000	-3.81319	0	0	-1000	-3.81319	0	0	0	1	NaN	-1000	-3.81319	0	0	0	1	NaN	0	-1000	-5.90229	0	0	-1000	-5.90229	0	0	0	1	NaN	-1000	-5.59291	0	0	0	1	NaN	0	-998.676
195	0		0	0	[m] : h + hco3 <==> co2 + h2o	Reversible	Carbon fixation	4.2.1.1	HCO3Em	carbonate dehydratase (HCO3 equilibration reaction), irreversible, mitochondrial	-0.0273238	995.514	685.238	714.823	-0.0273238	995.514	320.768	-1	296.006	0	0	-0.0273238	995.481	335.181	-1	307.417	0	0	1	-0.0495954	993.864	323.548	296.945	-0.0495954	993.864	321.389	0	290.212	0.12774	0.951248	-0.0353598	994.069	354.312	0	335.615	8.23455e-19	1.12131e-23	0	-0.0606636
196	0		0	0	[h] : dhap + e4p --> s17bp	Forward only	Carbon fixation	4.1.2.13	FBA3hi	Sedoheptulose 1,7-bisphosphate D-glyceraldehyde-3-phosphate-lyase	0.49316	2.76545	0.64834	0.639804	0.49316	2.76545	0.985852	1	0.961946	0	0	0.49316	0.708541	0.525482	-1	0.520279	0	0	1	0.891259	3.6581	0.996195	0.983131	0.891259	3.6581	1.8003	1	1.75645	0	0	0.822014	0.877593	0.830983	-1	0.82977	0	0	1	0.340267
197	0		0	0	[h] : 13dpg + h + nadph --> g3p + nadp + pi	Forward only	Carbon fixation	1.2.1.13	GAPDH_nadp_hi	glyceraldehyde-3-phosphate dehydrogenase (NADP+) (phosphorylating)	0	1000	575.919	579.145	0	1000	564.916	-1	564.034	9.48394e-06	0.00223164	0	1000	218.469	-1	176.88	0	0	1	0	1000	558.974	551.734	0	1000	210.294	-1	165.306	0	0	0	1000	518.534	-1	500.762	5.47563e-28	1.46517e-34	1	0
198	0		0	1	[h] : h + hco3 --> co2 + h2o	Forward only	Carbon fixation	4.2.1.1	HCO3Ehi	carbonate dehydratase (HCO3 equilibration reaction), irreversible, chloroplast	3.81121	17.1357	5.40613	5.18591	3.81121	17.1357	6.47663	0	6.37239	0	0	3.81121	6.28427	4.93764	0	4.94838	6.15525e-265	1.12499930000000e-317	0	5.89872	21.9437	8.01972	7.78167	5.89872	21.9437	9.9663	1	9.75056	0	0	5.58562	7.82235	6.75972	-1	6.74151	0	0	1	4.49601
199	0		0	0	[h] : h + nadph + oaa --> mal-L + nadp	Forward only	Carbon fixation	1.1.1.82	MDH_nadp_hi	malate dehydrogenase (NADP+)	0	1000	573.256	578.074	0	1000	557.306	-1	555.246	2.19775e-08	1.70313e-06	0	1000	548.71	-1	539.645	5.15253e-17	5.16405e-14	1	0	1000	557.515	547.783	0	1000	203.994	-1	160.173	0	0	0	1000	521.448	-1	508.555	2.1637e-23	1.11969e-27	1	0
200	1		0	0	[m] : mal-L + nad --> co2 + nadh + pyr	Forward only	Carbon fixation	1.1.1.39	MDHCm	malate dehydrogenase (decarboxylating)	0	0.0330484	0.000195074	8.41717e-05	0	0.0330484	0.000185025	0	8.58147e-05	0.834667	0.767616	0	0.0330484	8.68932e-05	0	3.61041e-05	4.92879e-292	1.88082e-34	0	0	0.0603123	0.000324812	0.000135902	0	0.0603123	0.000300093	0	0.000143865	3.65948e-05	0.486867	0	0.477539	0.00465309	0	0.00210671	0	5.19015e-118	0	0
201	1		0	0	[c] : co2 + h2o + pep --> h + oaa + pi	Forward only	Carbon fixation	4.1.1.31	PPC	phosphoenolpyruvate carboxylase	0	11.5743	0.194872	0.0874009	0	11.5743	0.190238	0	0.0902599	0.183603	1.07333	0	0.475542	0.00192785	0	0.000755813	0	1.64885e-239	0	0	14.2058	0.239887	0.121753	0	14.2058	0.238441	0	0.127244	0.0368199	1.40762	0	0.0956549	0.000189841	0	7.30247e-05	0	3.11544e-231	0	0
202	0		0	1	[h] : atp + pi + pyr --> amp + (2) h + pep + ppi	Forward only	Carbon fixation	2.7.9.1	PPDKh	pyruvate phosphate dikinase	0	0.00989072	0.00328938	0.00344547	0	0.00989072	0.00326069	0	0.00342872	0.051356	0.0799969	0	0.00989072	0.00265469	0	0.00278679	8.68452e-279	0	0	0	0.0179408	0.00525675	0.00553586	0	0.0179408	0.00593335	1	0.00627668	6.20081e-165	7.24893e-158	0	0.0122934	0.00127845	-1	0.000998134	0	0	1	0
203	0		0	0	[h] : atp + ru5p-D --> adp + h + rb15bp	Forward only	Carbon fixation	2.7.1.19	PRUK	phosphoribulokinase	0.682635	3.01479	0.871659	0.865167	0.682635	3.00952	1.20815	1	1.18359	0	0	0.682635	0.95369	0.727173	-1	0.720462	0	0	1	1.23318	4.10819	1.37223	1.35887	1.23318	4.09855	2.17773	1	2.13433	0	0	1.13762	1.22099	1.15081	-1	1.14894	0	0	1	0
204	0		0	0	[h] : co2 + h2o + rb15bp --> (2) 3pg + (2) h	Forward only	Carbon fixation	4.1.1.39	RBPCh	ribulose-bisphosphate carboxylase	0.682635	3.01479	0.871593	0.86501	0.682635	3.00952	1.20801	1	1.18352	0	0	0.682635	0.95369	0.727104	-1	0.720395	0	0	1	1.23318	4.10819	1.37212	1.35877	1.23318	4.09855	2.1775	1	2.13416	0	0	1.13762	1.22099	1.15074	-1	1.14887	0	0	1	0
205	0		0	0	[h] : h2o + s17bp --> pi + s7p	Forward only	Carbon fixation	3.1.3.37	SBP	sedoheptulose-bisphosphatase	0.49316	2.76545	0.64834	0.639804	0.49316	2.76545	0.985852	1	0.961946	0	0	0.49316	0.708541	0.525482	-1	0.520279	0	0	1	0.891259	3.6581	0.996195	0.983131	0.891259	3.6581	1.8003	1	1.75645	0	0	0.822014	0.877593	0.830983	-1	0.82977	0	0	1	0.340267
206	0		0	1	[c] : 13dpg + h + nadph --> g3p + nadp + pi	Forward only	Carbon fixation	1.2.1.13	GAPDH_nadp	glyceraldehyde-3-phosphate dehydrogenase (NADP+) (phosphorylating)	0	3.65695	0.0332554	0.0146683	0	3.65695	0.0359457	0	0.0173513	7.00526e-15	0.354175	0	0.713314	0.0167446	0	0.00769414	5.61807e-164	1.32124e-35	0	0	4.5108	0.0552942	0.0265062	0	4.5108	0.0475251	-1	0.0246651	0.000283516	0.0102554	0	0.477539	0.0149448	-1	0.00740097	0	1.06762e-88	1	0
207	0		0	0	[m] : akg + asp-L <==> glu-L + oaa	Reversible	Carbon fixation;Glutamate metabolism;Alanine and aspartate metabolism	2.6.1.1	ASPATm	aspartate aminotransferase, mitochondrial	-1000	1000	13.5933	0	-1000	1000	16.4088	0	0	0.557456	0.0470564	-1000	1000	101.906	0	40.7902	0	0	0	-1000	1000	16.6495	0	-1000	1000	15.7615	0	0	0.995899	0.92187	-1000	1000	30.4734	0	0	2.14466e-10	5.61387e-21	0	-1000
208	0		0	0	[h] : mal-L + nadp <==> co2 + nadph + pyr	Reversible	Carbon fixation;Pyruvate metabolism	1.1.1.40	MDHC_nadp_hr	malate dehydrogenase (oxaloacetate decarboxylating) (NADP+)	-16.4621	-4.32945	0	0	-16.4621	-4.33346	0	0	0	1	NaN	-5.61071	-4.56436	0	0	0	1	NaN	0	-20.7269	-5.84265	0	0	-20.7269	-5.84998	0	0	0	1	NaN	-6.69983	-6.06598	0	0	0	1	NaN	0	-34.8314
209	0		0	0	[u] : anxan + ascb-L <==> zaxan + dhdascb + h2o	Reversible	Carotenoid biosynthesis	1.10.99.3	ANXANASCOR	antheraxanthin:ascorbate oxidoreductase	-1.9221e-05	0.0165233	5.89776e-06	0	-1.9221e-05	0.0165233	2.7464e-06	0	0	0.000758289	0.160462	-1.9221e-05	0.0165233	1.38069e-05	0	0	1.06598e-42	0.0136946	0	-3.45977e-05	0.0301544	1.48729e-05	0	-3.45977e-05	0.0301544	7.74031e-06	0	0	0.82007	0.310165	-3.19792e-05	0.0604072	8.56326e-06	0	0	0.708503	0.251558	0	-4.98293e-07
210	0		0	0	[u] : caro + o2 + nadph + h <==> bcrptxan + h2o + nadp	Reversible	Carotenoid biosynthesis	1.14.13.-	BCAROH	beta-carotene hydroxylase	2.49873e-05	2.49873e-05	2.49873e-05	2.49873e-05	2.49873e-05	2.49873e-05	2.49873e-05	-1	2.49873e-05	0	0	2.49873e-05	2.49873e-05	2.49873e-05	-1	2.49873e-05	0	0	1	4.49771e-05	4.49771e-05	4.49771e-05	4.49771e-05	4.49771e-05	4.49771e-05	4.49771e-05	-1	4.49771e-05	0	0	4.1573e-05	4.1573e-05	4.1573e-05	-1	4.1573e-05	0	0	1	6.4778e-07
211	0		0	0	[u] : caro + fdxrd + o2 <==> echn + fdxox + h2o + (2) h	Reversible	Carotenoid biosynthesis		BCAROKT	beta-carotene ketolase	0	0	0	0	0	0	0	0	0	1	NaN	0	0	0	0	0	1	NaN	0	0	0	0	0	0	0	0	0	0	1	NaN	0	0	0	0	0	1	NaN	0	0
212	0		0	0	[u] : bcrptxan + o2 + nadph + h <==> zaxan + h2o + nadp	Reversible	Carotenoid biosynthesis	1.14.13.-	BCRPTXANH	beta-Cryptoxanthin hydroxylase	2.49873e-05	2.49873e-05	2.49873e-05	2.49873e-05	2.49873e-05	2.49873e-05	2.49873e-05	-1	2.49873e-05	0	0	2.49873e-05	2.49873e-05	2.49873e-05	-1	2.49873e-05	0	0	1	4.49771e-05	4.49771e-05	4.49771e-05	4.49771e-05	4.49771e-05	4.49771e-05	4.49771e-05	-1	4.49771e-05	0	0	4.1573e-05	4.1573e-05	4.1573e-05	-1	4.1573e-05	0	0	1	6.4778e-07
213	0		0	0	[h] : dcaro <==> acaro	Reversible	Carotenoid biosynthesis	1.14.-.-	LCYA	lycopene cyclase (alpha-carotene producing)	4.61303e-05	4.61303e-05	4.61303e-05	4.61303e-05	4.61303e-05	4.61303e-05	4.61303e-05	-1	4.61303e-05	0	0	4.61303e-05	4.61303e-05	4.61303e-05	-1	4.61303e-05	0	0	1	8.30346e-05	8.30346e-05	8.30346e-05	8.30346e-05	8.30346e-05	8.30346e-05	8.30346e-05	1	8.30346e-05	0	0	7.67501e-05	7.67501e-05	7.67501e-05	-1	7.67501e-05	0	0	1	1.1959e-06
214	0		0	0	[u] : gcaro <==> caro	Reversible	Carotenoid biosynthesis	1.14.-.-	LCYB	lycopene cyclase (beta-carotene producing)	5.19065e-05	5.19065e-05	5.19065e-05	5.19065e-05	5.19065e-05	5.19065e-05	5.19065e-05	1	5.19065e-05	2.12777e-60	2.30966e-51	5.19065e-05	5.19065e-05	5.19065e-05	-1	5.19065e-05	0	0	1	9.34317e-05	9.34317e-05	9.34317e-05	9.34317e-05	9.34317e-05	9.34317e-05	9.34317e-05	1	9.34317e-05	1.08717e-81	1.25679e-83	8.63603e-05	8.63603e-05	8.63603e-05	-1	8.63603e-05	0	0	1	1.37809e-06
215	0		0	0	[h] : lyc <==> dcaro	Reversible	Carotenoid biosynthesis	1.14.-.-	LCYD	lycopene cyclase (delta-carotene producing)	4.61303e-05	4.61303e-05	4.61303e-05	4.61303e-05	4.61303e-05	4.61303e-05	4.61303e-05	-1	4.61303e-05	0	0	4.61303e-05	4.61303e-05	4.61303e-05	-1	4.61303e-05	0	0	1	8.30346e-05	8.30346e-05	8.30346e-05	8.30346e-05	8.30346e-05	8.30346e-05	8.30346e-05	1	8.30346e-05	0	0	7.67501e-05	7.67501e-05	7.67501e-05	-1	7.67501e-05	0	0	1	1.1959e-06
216	0		0	0	[h] : dcaro <==> ecaro	Reversible	Carotenoid biosynthesis	1.14.-.-	LCYE	lycopene cyclase (epsilon-carotene producing)	0	0	0	0	0	0	0	0	0	1	NaN	0	0	0	0	0	1	NaN	0	0	0	0	0	0	0	0	0	0	1	NaN	0	0	0	0	0	1	NaN	0	0
217	0		0	0	[h] : lyc <==> gcaro	Reversible	Carotenoid biosynthesis	1.14.-.-	LCYG	lycopene cyclase (gamma-carotene producing)	5.19065e-05	5.19065e-05	5.19065e-05	5.19065e-05	5.19065e-05	5.19065e-05	5.19065e-05	1	5.19065e-05	2.00714e-31	5.07938e-21	5.19065e-05	5.19065e-05	5.19065e-05	-1	5.19065e-05	0	0	1	9.34317e-05	9.34317e-05	9.34317e-05	9.34317e-05	9.34317e-05	9.34317e-05	9.34317e-05	1	9.34317e-05	0	0	8.63603e-05	8.63603e-05	8.63603e-05	-1	8.63603e-05	0	0	1	1.37809e-06
218	0		0	0	[u] : lut + o2 + nadph + h <==> loroxan + h2o + nadp	Reversible	Carotenoid biosynthesis		LUTH	lutein hydroxylase	1.24936e-05	1.24936e-05	1.24936e-05	1.24936e-05	1.24936e-05	1.24936e-05	1.24936e-05	1	1.24936e-05	0	0	1.24936e-05	1.24936e-05	1.24936e-05	1	1.24936e-05	0	3.92819e-290	1	2.24885e-05	2.24885e-05	2.24885e-05	2.24885e-05	2.24885e-05	2.24885e-05	2.24885e-05	1	2.24885e-05	1.86796e-164	4.10178e-116	2.07865e-05	2.07865e-05	2.07865e-05	-1	2.07865e-05	0	0	1	3.2389e-07
219	0		0	0	[u] : vioxan <==> neoxan	Reversible	Carotenoid biosynthesis	5.3.99.9	NEOXANS	neoxanthin synthase	1.05715e-05	1.05715e-05	1.05715e-05	1.05715e-05	1.05715e-05	1.05715e-05	1.05715e-05	0	1.05715e-05	0	0	1.05715e-05	1.05715e-05	1.05715e-05	0	1.05715e-05	0.00561398	0.537528	0	1.90288e-05	1.90288e-05	1.90288e-05	1.90288e-05	1.90288e-05	1.90288e-05	1.90288e-05	1	1.90288e-05	0	0	1.75886e-05	1.75886e-05	1.75886e-05	-1	1.75886e-05	0	0	1	2.74061e-07
220	0		0	0	[h] : norsp + pqh2 + o2 <==> lyc + pq + (2) h2o	Reversible	Carotenoid biosynthesis	1.14.99.30	NOR	Neurosporene oxidoreductase	9.80368e-05	9.80368e-05	9.80368e-05	9.80368e-05	9.80368e-05	9.80368e-05	9.80368e-05	1	9.80368e-05	0.00841783	0.000242194	9.80368e-05	9.80368e-05	9.80368e-05	-1	9.80368e-05	0	0	1	0.000176466	0.000176466	0.000176466	0.000176466	0.000176466	0.000176466	0.000176466	-1	0.000176466	0	0	0.00016311	0.00016311	0.00016311	-1	0.00016311	0	0	1	2.57399e-06
221	0		0	1	[h] : phyto + pq <==> phytfl + pqh2	Reversible	Carotenoid biosynthesis	1.14.99.-	PDS1	phytoene desaturase (1)	9.80368e-05	9.80368e-05	9.80368e-05	9.80368e-05	9.80368e-05	9.80368e-05	9.80368e-05	0	9.80368e-05	0.267496	0.00725507	9.80368e-05	9.80368e-05	9.80368e-05	0	9.80368e-05	0	0	0	0.000176466	0.000176466	0.000176466	0.000176466	0.000176466	0.000176466	0.000176466	-1	0.000176466	0	0	0.00016311	0.00016311	0.00016311	-1	0.00016311	0	0	1	2.57399e-06
222	0		0	1	[h] : phytfl + pq <==> zcaro + pqh2	Reversible	Carotenoid biosynthesis	1.14.99.-	PDS2	phytoene desaturase (2)	9.80368e-05	9.80368e-05	9.80368e-05	9.80368e-05	9.80368e-05	9.80368e-05	9.80368e-05	0	9.80368e-05	0.493147	0.0933789	9.80368e-05	9.80368e-05	9.80368e-05	0	9.80368e-05	0	0	0	0.000176466	0.000176466	0.000176466	0.000176466	0.000176466	0.000176466	0.000176466	-1	0.000176466	0	0	0.00016311	0.00016311	0.00016311	-1	0.00016311	0	0	1	2.57399e-06
223	0		0	0	[u] : vioxan + ascb-L <==> anxan + dhdascb + h2o	Reversible	Carotenoid biosynthesis	1.10.99.3	VIOXANOR	violaxanthin:ascorbate oxidoreductase	-1.72989e-05	0.0165252	1.53663e-06	0	-1.72989e-05	0.0165252	6.35035e-06	0	0	6.6498e-14	0.000127784	-1.72989e-05	0.0165252	2.71328e-06	0	0	0.624209	0.216186	0	-3.1138e-05	0.0301579	3.11752e-06	0	-3.1138e-05	0.0301579	2.68567e-06	0	0	0.999999	1.19962	-2.87813e-05	0.0604104	3.63797e-05	0	0	4.49396e-144	1.04218e-09	0	-4.48463e-07
224	0		0	1	[h] : zcaro + pqh2 + o2 <==> norsp + pq + (2) h2o	Reversible	Carotenoid biosynthesis	1.14.99.30	ZDS	zeta-carotene desaturase	9.80368e-05	9.80368e-05	9.80368e-05	9.80368e-05	9.80368e-05	9.80368e-05	9.80368e-05	0	9.80368e-05	4.731e-12	0.155072	9.80368e-05	9.80368e-05	9.80368e-05	0	9.80368e-05	0	0	0	0.000176466	0.000176466	0.000176466	0.000176466	0.000176466	0.000176466	0.000176466	-1	0.000176466	0	0	0.00016311	0.00016311	0.00016311	-1	0.00016311	0	0	1	2.57399e-06
225	0		0	0	[h] : tczcar <==> dczcar	Reversible	Carotenoid biosynthesis	5.2.1.12	TCZCARI	9,15,9'-tricis-zeta-carotene cis-trans-isomerase	3.48638e-35	-5.13074e-22	0	0	-4.40009e-37	8.18233e-21	0	0	0	1	NaN	-2.46071e-30	2.76002e-21	0	0	0	1	NaN	0	-8.71595e-36	-6.84099e-22	0	0	0	-1.8221e-20	0	0	0	1	NaN	2.34671e-36	-1.07447e-21	0	0	0	1	NaN	0	0
226	0		0	0	[h] : tclyc <==> lyc	Reversible	Carotenoid biosynthesis	5.2.1.13	TCLYCI	7,9,7',9'-tetracis-lycopene cis-trans-isomerase	0	-5.13074e-22	0	0	0	8.18233e-21	0	0	0	1	NaN	0	2.76002e-21	0	0	0	1	NaN	0	0	-6.84099e-22	0	0	0	-1.8221e-20	0	0	0	1	NaN	0	-1.07447e-21	0	0	0	1	NaN	0	0
227	0		0	0	[u] : anxan + nadph + h + o2 --> vioxan + nadp + h2o	Forward only	Carotenoid biosynthesis	1.14.13.90	ANXANOR	antheraxanthin,NADH:oxygen oxidoreductase	0	0.0165425	4.06564e-06	1.52636e-06	0	0.0165425	1.27119e-05	1	4.47648e-06	0	4.70838e-13	0	0.0165425	6.3773e-06	1	2.34143e-06	8.61678e-155	0.00338238	1	0	0.030189	8.18949e-06	3.07266e-06	0	0.030189	8.00885e-06	0	3.50469e-06	1.2331e-21	1.38747	0	0.0604392	5.37588e-05	0	1.67328e-05	0	4.19523e-17	0	0
228	0		0	0	[u] : acaro + o2 + nadph + h --> zxan + h2o + nadp	Forward only	Carotenoid biosynthesis	1.14.13.-	CHYA1	alpha-carotene hydroxylase (zeinoxanthin forming)	0	3.65198e-05	1.14792e-05	1.0445e-05	0	3.65198e-05	1.18528e-05	1	1.08617e-05	0.0141253	0.00243383	0	3.65198e-05	1.24984e-05	1	1.15628e-05	3.04126e-12	8.73731e-20	1	0	6.57357e-05	2.11749e-05	1.91538e-05	0	6.57357e-05	2.11579e-05	0	1.90676e-05	0.140211	1.44334	0	6.07605e-05	2.1682e-05	0	2.04824e-05	3.65948e-05	0.0200825	0	0
229	0		0	0	[u] : acaro + o2 + nadph + h --> crpxan + h2o + nadp	Forward only	Carotenoid biosynthesis		CHYA2	alpha-carotene hydroxylase (alpha-cryptoxanthin forming)	0	3.65198e-05	2.50407e-05	2.60749e-05	0	3.65198e-05	2.46671e-05	-1	2.56581e-05	0.0141253	0.00243383	0	3.65198e-05	2.40215e-05	-1	2.4957e-05	3.04126e-12	8.73731e-20	1	0	6.57357e-05	4.45608e-05	4.65819e-05	0	6.57357e-05	4.45778e-05	0	4.66681e-05	0.140211	1.44334	0	6.07605e-05	3.90785e-05	0	4.02781e-05	4.58029e-142	1.8434e-166	0	0
230	0		0	0	[u] : crpxan + o2 + nadph + h --> lut + h2o + nadp	Forward only	Carotenoid biosynthesis		CXHY	cryptoxanthin hydroxylase	0	3.65198e-05	2.50407e-05	2.60749e-05	0	3.65198e-05	2.46671e-05	-1	2.56581e-05	0.0141253	0.00243383	0	3.65198e-05	2.40215e-05	-1	2.4957e-05	3.04126e-12	8.73731e-20	1	0	6.57357e-05	4.45608e-05	4.65819e-05	0	6.57357e-05	4.45778e-05	0	4.66681e-05	0.140211	1.44334	0	6.07605e-05	3.90785e-05	0	4.02781e-05	4.58029e-142	1.8434e-166	0	0
231	0		0	1	[h] : (2) ggdp --> (2) ppi + phyto + (2) h	Forward only	Carotenoid biosynthesis	2.5.1.32	PSY	phytoene synthase	9.80368e-05	9.80368e-05	9.80368e-05	9.80368e-05	9.80368e-05	9.80368e-05	9.80368e-05	0	9.80368e-05	0.524911	1.45159	9.80368e-05	9.80368e-05	9.80368e-05	0	9.80368e-05	0	0	0	0.000176466	0.000176466	0.000176466	0.000176466	0.000176466	0.000176466	0.000176466	1	0.000176466	0	0	0.00016311	0.00016311	0.00016311	-1	0.00016311	0	0	1	2.57399e-06
232	0		0	0	[u] : zaxan + nadph + h + o2 --> anxan + nadp + h2o	Forward only	Carotenoid biosynthesis	1.14.13.90	ZAXANOR	zeaxanthin,NADH:oxygen oxidoreductase	0	0.0165425	1.19553e-05	4.03709e-06	0	0.0165425	6.46914e-06	-1	2.2211e-06	2.86408e-223	0.00340736	0	0.0165425	2.36613e-05	1	8.93303e-06	4.53893e-213	0.000105759	1	0	0.030189	2.55432e-05	7.32413e-06	0	0.030189	1.83986e-05	0	7.62978e-06	1.24675e-13	0.314527	0	0.0604392	1.77826e-05	0	6.50683e-06	2.17968e-14	0.132345	0	0
233	0		0	0	[u] : zxan + o2 + nadph + h --> lut + h2o + nadp	Forward only	Carotenoid biosynthesis		ZHY	zeinoxanthin hydroxylase	0	3.65198e-05	1.14792e-05	1.0445e-05	0	3.65198e-05	1.18528e-05	1	1.08617e-05	0.0141253	0.00243383	0	3.65198e-05	1.24984e-05	1	1.15628e-05	3.04126e-12	8.73731e-20	1	0	6.57357e-05	2.11749e-05	1.91538e-05	0	6.57357e-05	2.11579e-05	0	1.90676e-05	0.140211	1.44334	0	6.07605e-05	2.1682e-05	0	2.04824e-05	3.65948e-05	0.0200825	0	0
234	0		0	0	[h] : phyto + pq --> dcphytfl + pqh2	Forward only	Carotenoid biosynthesis	1.3.5.5	PHYTOOR	15-cis-phytoene:plastoquinone oxidoreductase	3.92218e-35	0	0	0	0	8.18233e-21	0	0	0	1	NaN	0	2.76002e-21	0	0	0	1	NaN	0	0	0	0	0	0	0	0	0	0	1	NaN	2.17899e-36	0	0	0	0	1	NaN	0	0
235	0		0	0	[h] : dcphytfl + pq --> tczcar + pqh2	Forward only	Carotenoid biosynthesis	1.3.5.5	DCPHYTFLOR	15,9'-dicis-phytofluene:plastoquinone oxidoreductase	3.48638e-35	0	0	0	0	8.18233e-21	0	0	0	1	NaN	0	2.76002e-21	0	0	0	1	NaN	0	0	0	0	0	0	0	0	0	0	1	NaN	2.34671e-36	0	0	0	0	1	NaN	0	0
236	0		0	0	[h] : dczcar + (2) pq --> tclyc + (2) pqh2	Forward only	Carotenoid biosynthesis	1.3.5.6	DCZCAROR	9,9'-dicis-zeta-carotene:quinone oxidoreductase	0	0	0	0	0	8.18233e-21	0	0	0	1	NaN	0	2.76002e-21	0	0	0	1	NaN	0	0	0	0	0	0	0	0	0	0	1	NaN	0	0	0	0	0	1	NaN	0	0
237	1		0	0	[h] : ficytc <==> focytc	Reversible	Cofactor recycling		CY_focytc_h	ferrocytochrome c recycle, chloroplast	0	0.0165242	1.53014e-05	5.3979e-06	0	0.0165242	2.30775e-05	0	6.99975e-06	2.29419e-39	0.0586394	0	0.0165242	1.98592e-05	0	5.83732e-06	8.07648e-16	0.346541	0	0	0.0301561	3.11101e-05	1.07028e-05	0	0.0301561	3.86214e-05	0	1.33051e-05	2.22897e-29	0.424622	0	0.0260877	2.77271e-05	0	7.67919e-06	1.1984e-86	0.794673	0	0
238	1		0	0	[c] : ficytb5 <==> focytb5	Reversible	Cofactor recycling		CY_focytb5_c	ferrocytochrome b5 recycle, cytosol	0	0.00780722	0.00667588	0.0067133	0	0.00780722	0.00667091	0	0.00670407	1.06598e-42	0.365721	0	0.00780722	0.00641849	0	0.00658516	0	0	0	0	0.0140796	0.0116793	0.0120261	0	0.0140796	0.0119967	0	0.0120619	8.72500000000000e-321	9.59758e-228	0	0.0121909	0.010636	0	0.01082	0	0	0	0
239	0		1	0	[m] : etfox + fadh2 --> etfrd + fad	Forward only	Cofactor recycling		ETF	electron transfer flavoprotein	0	1000	417.452	408.818	0	1000	427.817	1	426.236	0.00276753	0.00474284	0	999.443	453.829	1	463.884	6.79326e-22	1.88691e-28	1	0	1000	431.438	435.165	0	1000	432.094	0	433.727	0.447251	1.37968	0	999.36	475.812	0	490.529	2.28726e-32	1.76765e-41	0	0
240	0		1	0	[m] : etfrd + q8 --> etfox + q8h2	Forward only	Cofactor recycling	1.5.5.1	ETFQO	Electron transfer flavoprotein-ubiquinone oxidoreductase	0	1000	417.452	408.818	0	1000	427.817	1	426.236	0.00276753	0.00474284	0	999.443	453.829	1	463.884	6.79326e-22	1.88691e-28	1	0	1000	431.438	435.165	0	1000	432.094	0	433.727	0.447251	1.37968	0	999.36	475.812	0	490.529	2.28726e-32	1.76765e-41	0	0
241	1		0	0	[m] : cys-L + akg <==> mercppyr + glu-L	Reversible	Cysteine and methionine metabolism	2.6.1.1	CYSTAm	L-Cysteine:2-oxoglutarate aminotransferase	3.81231e-08	1000	315.539	286.33	3.81231e-08	1000	319.361	0	289.374	0.100485	0.467156	3.81231e-08	1000	338.976	0	314.125	2.31708e-09	4.10403e-14	0	6.86216e-08	1000	324.827	298.735	6.86216e-08	1000	320.061	0	285.815	0.0150422	0.303307	6.34279e-08	1000	355.985	0	338.048	1.23118e-16	1.17425e-23	0	1.26016e-07
242	0		0	0	[m] : mercppyr + hso3 <==> tsul + pyr	Reversible	Cysteine and methionine metabolism	2.8.1.2	MERCPPYRST	3-Mercaptopyruvate:sulfite sulfurtransferase	3.81231e-08	0.0165243	3.43745e-05	1.14509e-05	3.81231e-08	0.0165243	4.69346e-05	0	1.62267e-05	1.61528e-64	0.0333571	3.81231e-08	0.0165243	3.85957e-05	0	1.12395e-05	0.000184985	0.698831	0	6.86216e-08	0.0301562	6.69276e-05	2.25709e-05	6.86216e-08	0.0301562	6.18876e-05	0	2.4288e-05	0.000549805	0.992721	6.34279e-08	0.0478275	0.000114066	0	3.69847e-05	3.42113e-128	3.7766e-05	0	1.26016e-07
243	0		0	0	[h] : 3snpyr + h2o --> hso3 + pyr	Forward only	Cysteine and methionine metabolism		3SPYRSPh	3-sulfinopyruvate hydrolase (spontaneous), chloroplast	0	0.0165242	4.69475e-05	1.75403e-05	0	0.0165242	4.95764e-05	0	2.2455e-05	2.15928e-35	1.07247	0	0.0165242	0.000163799	0	0.000113203	0	1.85501e-114	0	0	0.0301561	8.70679e-05	3.77189e-05	0	0.0301561	0.000105573	0	4.7421e-05	4.36628e-30	0.123138	0	0.0152315	0.000673482	0	0.000672749	0	0	0	0
244	0		0	0	[m] : 3snpyr + h2o --> hso3 + pyr	Forward only	Cysteine and methionine metabolism		3SPYRSPm	3-sulfinopyruvate hydrolase (spontaneous), mitochondria	0	0	0	0	0	0	0	0	0	1	NaN	0	0	0	0	0	1	NaN	0	0	0	0	0	0	0	0	0	0	1	NaN	0	0	0	0	0	1	NaN	0	0
245	0		0	0	[c] : acser + tsul --> scys-L + ac + h	Forward only	Cysteine and methionine metabolism	2.5.1.47;2.5.1.48	ACSERSULL	O3-Acetyl-L-serine acetate-lyase (adding hydrogen sulfide), cytosol	0	0	0	0	0	0	0	0	0	1	NaN	0	0	0	0	0	1	NaN	0	0	0	0	0	0	0	0	0	0	1	NaN	0	0	0	0	0	1	NaN	0	0
246	0		0	0	[h] : acser + tsul --> scys-L + ac + h	Forward only	Cysteine and methionine metabolism	2.5.1.47;2.5.1.48	ACSERSULLh	O3-Acetyl-L-serine acetate-lyase (adding hydrogen sulfide), chloroplast	0	0	0	0	0	0	0	0	0	1	NaN	0	0	0	0	0	1	NaN	0	0	0	0	0	0	0	0	0	0	1	NaN	0	0	0	0	0	1	NaN	0	0
247	0		0	0	[m] : acser + tsul --> scys-L + ac + h	Forward only	Cysteine and methionine metabolism	2.5.1.47;2.5.1.48	ACSERSULLm	O3-Acetyl-L-serine acetate-lyase (adding hydrogen sulfide), mitochondria	0	0	0	0	0	0	0	0	0	1	NaN	0	0	0	0	0	1	NaN	0	0	0	0	0	0	0	0	0	0	1	NaN	0	0	0	0	0	1	NaN	0	0
248	0		0	0	[h] : suchms + cys-L --> cyst-L + succ + h	Forward only	Cysteine and methionine metabolism	2.5.1.48	SHSL1h	O-Succinyl-L-homoserine succinate-lyase (adding cysteine)	0	0	0	0	0	0	0	0	0	1	NaN	0	0	0	0	0	1	NaN	0	0	0	0	0	0	0	0	0	0	1	NaN	0	0	0	0	0	1	NaN	0	0
249	0		0	0	[h] : suchms + h2s --> hcys-L + succ	Forward only	Cysteine and methionine metabolism	2.5.1.48;2.5.1.-	SHSL2h	O-succinyl-L-homoserine succinate-lyase (adding hydrogen sulfide)	0	0	0	0	0	0	0	0	0	1	NaN	0	0	0	0	0	1	NaN	0	0	0	0	0	0	0	0	0	0	1	NaN	0	0	0	0	0	1	NaN	0	0
250	0		0	0	[h] : suchms + h2o --> 2obut + succ + nh4 + h	Forward only	Cysteine and methionine metabolism	2.5.1.48	SHSL4h	O-Succinyl-L-homoserine succinate-lyase (deaminating;2-oxobutanoate-forming)	0	0	0	0	0	0	0	0	0	1	NaN	0	0	0	0	0	1	NaN	0	0	0	0	0	0	0	0	0	0	1	NaN	0	0	0	0	0	1	NaN	0	0
251	0		0	0	[m] : h2o + cys-D --> h + nh4 + pyr + h2s	Forward only	Cysteine and methionine metabolism	4.4.1.15	CSLm	D-cysteine sulfide-lyase (deaminating; pyruvate-forming), mitochondria	0	0	0	0	0	0	0	0	0	1	NaN	0	0	0	0	0	1	NaN	0	0	0	0	0	0	0	0	0	0	1	NaN	0	0	0	0	0	1	NaN	0	0
252	0		0	0	[h] : h2o + cys-D --> h + nh4 + pyr + h2s	Forward only	Cysteine and methionine metabolism	4.4.1.15	CSLh	D-cysteine sulfide-lyase (deaminating; pyruvate-forming), chloroplast	0	0	0	0	0	0	0	0	0	1	NaN	0	0	0	0	0	1	NaN	0	0	0	0	0	0	0	0	0	0	1	NaN	0	0	0	0	0	1	NaN	0	0
253	0		0	0	[h] : Lcyst + akg <==> 3spyr + glu-L	Reversible	Cysteine metabolism	2.6.1.1	AATC	aspartate aminotransferase, cysteate forming	0	0	0	0	0	0	0	0	0	1	NaN	0	0	0	0	0	1	NaN	0	0	0	0	0	0	0	0	0	0	1	NaN	0	0	0	0	0	1	NaN	0	0
254	0		0	0	[m] : Lcyst + akg <==> 3spyr + glu-L	Reversible	Cysteine metabolism	2.6.1.1	AATCm	aspartate aminotransferase, cysteate forming, mitochondria	0	0	0	0	0	0	0	0	0	1	NaN	0	0	0	0	0	1	NaN	0	0	0	0	0	0	0	0	0	0	1	NaN	0	0	0	0	0	1	NaN	0	0
255	0		0	0	[h] : 3sala + akg --> 3snpyr + glu-L	Forward only	Cysteine metabolism	2.6.1.1	AATG	aspartate aminotransferase, glutamate forming	0	0.0165242	4.69475e-05	1.75403e-05	0	0.0165242	4.95764e-05	0	2.2455e-05	2.15928e-35	1.07247	0	0.0165242	0.000163799	0	0.000113203	0	1.85501e-114	0	0	0.0301561	8.70679e-05	3.77189e-05	0	0.0301561	0.000105573	0	4.7421e-05	4.36628e-30	0.123138	0	0.0152315	0.000673482	0	0.000672749	0	0	0	0
256	0		0	0	[m] : 3sala + akg --> 3snpyr + glu-L	Forward only	Cysteine metabolism	2.6.1.1	AATGm	aspartate aminotransferase, glutamate forming, mitochondria	0	0	0	0	0	0	0	0	0	1	NaN	0	0	0	0	0	1	NaN	0	0	0	0	0	0	0	0	0	0	1	NaN	0	0	0	0	0	1	NaN	0	0
257	0		0	0	[h] : Lcystin + h2o --> pyr + nh4 + thcys	Forward only	Cysteine metabolism	4.4.1.8	CTINBL	cystathionine beta-lyase, cystine	0	0	0	0	0	0	0	0	0	1	NaN	0	0	0	0	0	1	NaN	0	0	0	0	0	0	0	0	0	0	1	NaN	0	0	0	0	0	1	NaN	0	0
258	1		0	0	[m] : mercppyr + glu-L --> cys-L + akg	Forward only	Cysteine metabolism	2.6.1.1	CYSATm	aspartate aminotransferase, cysteine forming	0	1000	315.539	286.33	0	1000	319.361	0	289.374	0.100485	0.467156	0	1000	338.976	0	314.125	2.31708e-09	4.10403e-14	0	0	1000	324.827	298.734	0	1000	320.061	0	285.815	0.0150422	0.303307	0	1000	355.984	0	338.048	1.23118e-16	1.17425e-23	0	0
259	0		0	0	[h] : mercppyr + glu-L --> cys-L + akg	Forward only	Cysteine metabolism	2.6.1.1	CYSAT	aspartate aminotransferase, cysteine forming, mitochondria	0	0	0	0	0	0	0	0	0	1	NaN	0	0	0	0	0	1	NaN	0	0	0	0	0	0	0	0	0	0	1	NaN	0	0	0	0	0	1	NaN	0	0
260	0		0	0	[h] : cys-L + o2 --> 3sala + h	Forward only	Cysteine metabolism	1.13.11.20	CYSDO	cysteine dioxygenase	0	0.0165242	4.69475e-05	1.75403e-05	0	0.0165242	4.95764e-05	0	2.2455e-05	2.15928e-35	1.07247	0	0.0165242	0.000163799	0	0.000113203	0	1.85501e-114	0	0	0.0301561	8.70679e-05	3.77189e-05	0	0.0301561	0.000105573	0	4.7421e-05	4.36628e-30	0.123138	0	0.0152315	0.000673482	0	0.000672749	0	0	0	0
261	0		0	0	[h] : acser + h2s --> cys-L + ac	Forward only	Cysteine metabolism	2.5.1.47	CYSS	cysteine synthase	0	0.0168218	9.15246e-06	4.86908e-06	0	0.0168218	1.27465e-05	1	6.28897e-06	1.96362e-50	4.17016e-06	0	0.0168218	5.30988e-06	-1	2.42483e-06	2.27542e-275	6.86969e-17	1	0	0.0306919	1.68036e-05	9.04327e-06	0	0.0306919	0.000218578	1	0.000195379	0	0	0	0.013719	2.08351e-06	-1	1.19567e-06	0	2.05884e-178	1	0
262	0		0	0	[h] : acser + tsul + trdrd --> cys-L + hso3 + trdox + ac + h	Forward only	Cysteine metabolism	2.5.1.47	CYSS_trdrd	cysteine synthase, thioredoxin	0	0.0165242	2.86459e-05	8.6515e-06	0	0.0165242	4.1508e-05	0	1.32094e-05	4.58409e-84	0.0225375	0	0.0165242	3.31711e-05	0	8.37022e-06	0.00011949	0.628321	0	0	0.0301561	5.30535e-05	1.61666e-05	0	0.0301561	5.06983e-05	0	1.80227e-05	2.27986e-05	1.28417	0	0.0478275	0.000101022	0	2.99587e-05	2.92152e-163	1.75097e-05	0	0
263	0		0	0	[h] : h2s + pyr + nh4 + h --> cys-L + h2o	Forward only	Cysteine metabolism	4.4.1.8	CYSTBL	cystathionine beta-lyase	0	0.0168218	0.000341075	0.000312059	0	0.0168218	0.000339823	0	0.000314474	1.74271e-11	1.32362	0	0.0168218	0.000461424	0	0.000410239	0	1.84405e-116	0	0	0.0306919	0.000619778	0.000568329	0	0.0306919	0.00043384	-1	0.000401451	0	2.45527e-99	0	0.0157267	0.00117933	1	0.00117588	0	0	1	0
264	0		0	1	[c] : atp + cys-L + trnacys --> amp + ppi + cystrna + h	Forward only	Cysteine metabolism	6.1.1.16	CYSTL	cysteine---tRNA ligase	0.000146088	0.0166703	0.00014988	0.000147722	0.000146088	0.0166703	0.000153217	0	0.000147973	1.9709e-33	0.17006	0.000146088	0.0166703	0.000150855	0	0.000147831	1.33767e-15	0.141224	0	0.000262959	0.0304191	0.00027041	0.000266166	0.000262959	0.0304191	0.000273483	1	0.000266764	4.03224e-49	0.000252382	0.000243057	0.0480705	0.000260688	-1	0.000248779	0	1.42287e-06	1	0.000771384
265	0		0	1	[c] : cystrna + h2o --> cys-L + trnacys	Forward only	Cysteine metabolism	3.1.1.29	CYSTAH	Cysteine-tRNA aminoacylhydrolase	0	0.0165242	3.68163e-06	1.6334e-06	0	0.0165242	7.04003e-06	0	1.88516e-06	1.9709e-33	0.165621	0	0.0165242	4.64407e-06	0	1.74331e-06	1.33767e-15	0.149209	0	0	0.0301561	7.409e-06	3.20737e-06	0	0.0301561	1.0469e-05	1	3.80573e-06	4.03224e-49	0.000272397	0	0.0478275	1.76004e-05	1	5.72237e-06	1.33756e-228	4.04002e-07	1	0
266	0		0	1	[h] : ser-L + accoa --> acser + coa	Forward only	Cysteine metabolism;Sulfur metabolism	2.3.1.30	SAT	serine O-acetyltransferase	0	0.0333461	7.54944e-05	2.92604e-05	0	0.0333461	9.52735e-05	0	4.14499e-05	4.84317e-88	0.0732106	0	0.0333461	5.83556e-05	0	2.19304e-05	5.62556e-57	0.063767	0	0	0.060848	9.83491e-05	4.34902e-05	0	0.060848	0.000341442	1	0.000265447	0	4.30338e-87	0	0.0486917	0.000136395	1	4.77709e-05	1.02907e-07	0.00565493	1	0
267	1		0	0	[m] : ser-L + accoa --> acser + coa	Forward only	Cysteine metabolism;Sulfur metabolism	2.3.1.30	SATm	serine O-acetyltransferase, mitochondria	0	0.0330484	1.83587e-05	4.09789e-06	0	0.0330484	2.19917e-05	0	7.14934e-06	9.04497e-190	0.878472	0	0.0330484	2.74138e-05	0	7.35478e-06	1.90519e-172	0.201602	0	0	0.0603123	7.66246e-05	2.42877e-05	0	0.0603123	5.71344e-05	0	1.94372e-05	2.10465e-25	0.212065	0	0.0478275	5.48713e-05	0	1.47871e-05	3.57704e-107	0.0904821	0	0
268	0		0	0	[h] : apotfen -->	Forward only	Demand		DM_apotfen_h	R_DM_apotfen_h	0	0	0	0	0	0	0	0	0	1	NaN	0	0	0	0	0	1	NaN	0	0	0	0	0	0	0	0	0	0	1	NaN	0	0	0	0	0	1	NaN	0	0
269	1		0	0	[c] : asnglcnacglcnacman-LPAREN-man-RPAREN-man -->	Forward only	Demand		DM_asnglcnacglcnacman(man)man_c	R_DM_asnglcnacglcnacman_LPAREN_man_RPAREN_man_c	0	0.000379867	2.73462e-06	1.07715e-06	0	0.000379867	2.74605e-06	0	1.17955e-06	9.69036e-07	1.48095	0	0.000379867	3.04145e-06	0	1.19284e-06	5.64443e-09	0.432222	0	0.00012311	0.000816355	0.000128532	0.000125198	0.00012311	0.000816355	0.000128604	0	0.000125605	1.79323e-32	1.37968	5.20522e-05	0.000586437	5.70283e-05	0	5.40687e-05	0	0	0	0.00263248
270	0		0	1	[m] : bhb -->	Forward only	Demand		DM_bhb_m	R_DM_bhb_m	0	0.00550807	3.59265e-05	1.37908e-05	0	0.00550807	4.00127e-05	0	1.6055e-05	1.71667e-18	0.35554	0	0.00550807	4.20019e-05	0	1.55833e-05	2.67203e-11	0.0697197	0	0	0.010052	2.94992e-05	1.09705e-05	0	0.010052	3.89249e-06	-1	1.48117e-06	0	2.08412e-35	0	0.00503447	3.89054e-05	1	1.52464e-05	2.35938e-81	0.000955102	1	0
271	0		0	1	[x] : bhb -->	Forward only	Demand		DM_bhb_x	R_DM_bhb_x	0	0.00550807	7.48785e-06	1.98769e-06	0	0.00550807	8.32679e-06	0	2.43623e-06	5.98393e-20	1.0091	0	0.00550807	6.57331e-06	0	1.924e-06	0.0034362	0.812124	0	0	0.010052	5.19404e-05	1.88036e-05	0	0.010052	7.53676e-05	1	3.54808e-05	4.25301e-260	1.16902e-06	0	0.00503447	6.38843e-06	-1	1.95083e-06	0	4.51859e-45	1	0
272	0		0	0	[c] : cat -->	Forward only	Demand		DM_cat_c	R_DM_cat_c	0	0	0	0	0	0	0	0	0	1	NaN	0	0	0	0	0	1	NaN	0	0	0	0	0	0	0	0	0	0	1	NaN	0	0	0	0	0	1	NaN	0	0
273	0		0	0	[c] : ficytb5 -->	Forward only	Demand		DM_ficytb5_c	R_DM_ficytb5_c	0	0	0	0	0	0	0	0	0	1	NaN	0	0	0	0	0	1	NaN	0	0	0	0	0	0	0	0	0	0	1	NaN	0	0	0	0	0	1	NaN	0	0
274	0		0	0	[m] : glu5sa -->	Forward only	Demand		DM_glu5sa_m	R_DM_glu5sa_m	0	0.00413106	9.32694e-07	0	0	0.00413106	9.52203e-07	0	0	0.974752	1.48095	0	0.00413106	1.12067e-06	0	0	0.000184985	1.00605	0	0	0.00753903	2.27353e-06	0	0	0.00753903	1.83667e-06	0	0	0.0141253	0.270862	0	0.00431526	8.37e-07	0	0	9.24665e-123	2.13316e-09	0	0
275	1		0	0	[c] : hcarn -->	Forward only	Demand		DM_hcarn_c	R_DM_hcarn_c	0	0.00122402	2.42931e-07	0	0	0.00122402	2.17337e-07	0	0	0.834667	1.30425	0	0.00122402	2.55349e-07	0	0	0.256978	1.393	0	0	0.00223379	4.83942e-07	0	0	0.00223379	3.7314e-07	0	0	0.246768	0.998481	0	0.0017287	1.87588e-07	0	0	0.0460384	0.116213	0	0
276	1		0	0	[h] : icit -->	Forward only	Demand		DM_icit_h	R_DM_icit_h	0	0.00367205	1.31228e-06	0	0	0.00367205	2.55286e-06	0	0	5.9636e-40	0.0933789	0	0.00367205	1.057e-06	0	0	1.84032e-06	0.961083	0	0	0.00670136	2.0135e-06	0	0	0.00670136	2.4682e-06	0	0	4.85876e-16	0.996628	0	0.00431526	1.78078e-06	0	0	3.32896e-24	1.11102	0	0
277	0		0	1	[c] : na1 -->	Forward only	Demand		DM_na1_c	R_DM_na1_c	0	4.88458	0.0526953	0.0359576	0	4.87632	0.0497112	0	0.0343019	0.0141253	0.117694	0	0.842268	0.159043	0	0.150228	0	0	0	0	6.29308	0.301133	0.281208	0	6.29308	0.0895085	-1	0.0641758	0	0	0	0.767486	0.0897177	-1	0.0676614	0	0	1	0
278	0		0	1	[h] : na1 -->	Forward only	Demand		DM_na1_h	R_DM_na1_h	0	4.88458	0.0948352	0.0716563	0	4.87632	0.091423	0	0.0691052	0.020477	0.273246	0	0.842268	0.061931	0	0.0487307	2.12409e-141	7.0125e-95	0	0	6.29308	0.145858	0.109127	0	6.29308	0.134523	-1	0.10469	0.0150422	0.000225458	0	0.767486	0.110591	-1	0.0891938	1.86359e-42	3.0923e-46	1	0
279	0		0	0	[m] : na1 -->	Forward only	Demand		DM_na1_m	R_DM_na1_m	0	4.88458	0.166242	0.154822	0	4.87632	0.171449	1	0.159967	5.02924e-07	0.0372102	0	0.842268	0.108304	-1	0.099653	0	8.92476e-274	1	0	6.29308	0.177462	0.145795	0	6.29308	0.394986	1	0.383294	0	0	0	0.767486	0.366313	1	0.373045	0	0	1	0
280	0		0	0	[x] : na1 -->	Forward only	Demand		DM_na1_x	R_DM_na1_x	0	7.00144	0.61987	0.429092	0	7.00144	0.663231	1	0.463492	8.24844e-15	0.000606177	0	1.57464	0.5631	-1	0.537916	1.39932e-167	1.90275e-11	1	0	8.62608	1.92464	1.75388	0	8.62608	0.837838	-1	0.58138	0	0	0	0.286965	0.0481352	-1	0.0369921	0	0	1	0
281	1		0	0	[h] : no -->	Forward only	Demand		DM_no_h	R_DM_no_h	0	0.0165242	1.53014e-05	5.3979e-06	0	0.0165242	2.30775e-05	0	6.99975e-06	2.29419e-39	0.0586394	0	0.0165242	1.98592e-05	0	5.83732e-06	8.07648e-16	0.346541	0	0	0.0301561	3.11101e-05	1.07028e-05	0	0.0301561	3.86214e-05	0	1.33051e-05	2.22897e-29	0.424622	0	0.0260877	2.77271e-05	0	7.67919e-06	1.1984e-86	0.794673	0	0
282	1		0	0	[u] : o2D -->	Forward only	Demand		DM_o2D_u	demand removing dummy o2 from system	3.0609	3.07742	3.07737	3.0774	3.0609	3.07742	3.07736	0	3.07739	3.21401e-64	0.0695959	3.0609	3.07742	3.07737	0	3.0774	0.091029	0.917106	0	4.37497	4.40513	4.40503	4.40509	4.37497	4.40513	4.40501	0	4.40508	2.94319e-57	0.171182	4.33339	4.40513	4.40459	0	4.4049	0	3.30227e-67	0	4.34998
283	0		0	0	[c] : photon298 -->	Forward only	Demand		DM_photon298_c	R_DM_photon298_c	0	0	0	0	0	0	0	0	0	1	NaN	0	0	0	0	0	1	NaN	0	0	0	0	0	0	0	0	0	0	1	NaN	0	0	0	0	0	1	NaN	0	0
284	0		0	0	[u] : photon437 -->	Forward only	Demand		DM_photon437_u	R_DM_photon437_u	0	0	0	0	0	0	0	0	0	1	NaN	0	0	0	0	0	1	NaN	0	0	0	0	0	0	0	0	0	0	1	NaN	0	0	0	0	0	1	NaN	0	0
285	0		0	0	[u] : photon438 -->	Forward only	Demand		DM_photon438_u	R_DM_photon438_u	0	0	0	0	0	0	0	0	0	1	NaN	0	0	0	0	0	1	NaN	0	0	0	0	0	0	0	0	0	0	1	NaN	0	0	0	0	0	1	NaN	0	0
286	0		0	0	[h] : photon450 -->	Forward only	Demand		DM_photon450_h	R_DM_photon450_h	0	0	0	0	0	0	0	0	0	1	NaN	0	0	0	0	0	1	NaN	0	0	0	0	0	0	0	0	0	0	1	NaN	0	0	0	0	0	1	NaN	0	0
287	0		0	0	[s] : photon490 -->	Forward only	Demand		DM_photon490_s	R_DM_photon490_s	0	0	0	0	0	0	0	0	0	1	NaN	0	0	0	0	0	1	NaN	0	0	0	0	0	0	0	0	0	0	1	NaN	0	0	0	0	0	1	NaN	0	0
288	0		0	0	[h] : photon646 -->	Forward only	Demand		DM_photon646_h	R_DM_photon646_h	4.25724	4.25724	4.25724	4.25724	4.25724	4.25724	4.25724	1	4.25724	0	3.86004e-51	4.25724	4.25724	4.25724	1	4.25724	0	4.01023e-288	1	6.09377	6.09377	6.09377	6.09377	6.09377	6.09377	6.09377	-1	6.09377	0	0	6.09384	6.09384	6.09384	1	6.09384	0	0	1	6.09329
289	1		0	0	[u] : photon673 -->	Forward only	Demand		DM_photon673_u	R_DM_photon673_u	0	0.0660969	0.000213777	7.70154e-05	0	0.0660969	0.000268419	0	0.000110335	3.21401e-64	0.0695959	0	0.0660969	0.000199847	0	7.66691e-05	0.091029	0.917106	0	0	0.120625	0.000397782	0.000142737	0	0.120625	0.000478254	0	0.000200688	2.94319e-57	0.171182	0	0.286965	0.00214165	0	0.000908421	0	3.30227e-67	0	0
290	0		0	1	[u] : photon680 -->	Forward only	Demand		DM_photon680_u	R_DM_photon680_u	0	1.90344	0.212892	0.147789	0	1.90344	0.212764	0	0.149587	0.0231008	1.48911	0	1.85502	0.0773239	0	0.0401128	0	0	0	0	2.75066	1.12798	1.0448	0	2.75066	0.288652	-1	0.201502	0	0	0	0.38262	0.00784993	-1	0.00368008	0	0	1	0
291	1		0	0	[m] : udg -->	Forward only	Demand		DM_udg_m	R_DM_udg_m	0	0.00660969	5.26868e-06	1.4298e-06	0	0.00660969	5.43221e-06	0	1.56272e-06	1.0695e-12	1.42992	0	0.00660969	5.14099e-06	0	1.40792e-06	4.6977e-11	1.42099	0	0	0.0120625	1.25911e-05	2.82124e-06	0	0.0120625	1.68632e-05	0	5.03666e-06	6.40518e-174	0.365437	0	0.00717412	2.34784e-06	0	0	0	7.70839e-07	0	0
292	0		0	0	[m] : urdglyc -->	Forward only	Demand		DM_urdglyc_m	R_DM_urdglyc_m	0	0.00660969	3.12298e-06	1.06602e-06	0	0.00660969	3.90927e-06	0	1.15085e-06	7.76999e-06	0.773844	0	0.00660969	4.84322e-06	0	1.16418e-06	1.46372e-16	0.152973	0	0	0.0120625	5.6118e-06	1.9222e-06	0	0.0120625	1.86953e-06	0	0	0	0.0304255	0	0.00717412	6.40036e-06	0	1.50368e-06	8.894e-100	0.965372	0	0
293	1		0	0	[h] : pqa -->	Forward only	Demand		DM_pqa_h	Plastoquinol A sink	0	0.000243003	1.06038e-06	0	0	0.000243003	1.02329e-06	0	0	0.32476	1.25963	0	0.000243003	1.13906e-06	0	0	7.76999e-06	0.910849	0	0	0.000443473	2.18245e-06	1.14199e-06	0	0.000443473	2.32074e-06	0	1.16337e-06	0.0782497	0.950593	0	0.000282307	1.45912e-06	0	0	3.60877e-87	1.41537e-05	0	0
294	0		0	0	[m] : amob -->	Forward only	Demand		DM_amob_m	S-Adenosyl-4-methylthio-2-oxobutanoate sink	3.81231e-08	3.81231e-08	0	0	3.81231e-08	3.81231e-08	0	0	0	1	NaN	3.81231e-08	3.81231e-08	0	0	0	1	NaN	0	6.86216e-08	6.86216e-08	0	0	6.86216e-08	6.86216e-08	0	0	0	1	NaN	6.34279e-08	6.34279e-08	0	0	0	1	NaN	0	1.26016e-07
295	0		0	0	[c] : 12dgr18111Z160 -->	Forward only	Demand		DM_12dgr18111Z160_c	R_DM_12dgr18111Z160_c	0	0.000489607	7.80294e-07	0	0	0.000489607	9.65859e-07	0	0	0.000260519	0.600431	0	0.000489607	8.0104e-07	0	0	0.00297575	1.38688	0	0	0.000893515	1.68631e-06	0	0	0.000893515	1.83902e-06	0	0	0.00152681	1.11073	0	0.000474191	8.16666e-07	0	0	2.20459e-83	0.000233296	0	0
296	1		0	0	[c] : 12dgr1819Z160 -->	Forward only	Demand		DM_12dgr1819Z160_c	R_DM_12dgr1819Z160_c	0	0.000533039	1.36885e-06	0	0	0.000533039	1.34436e-06	0	0	0.417968	1.42244	0	0.000533039	1.34105e-06	0	0	0.99914	1.37507	0	0	0.000972778	2.65781e-06	1.15701e-06	0	0.000972778	3.06245e-06	0	1.32143e-06	1.51009e-11	0.537531	0	0.000487621	1.52838e-06	0	0	2.89292e-111	1.87533e-05	0	0
297	1		0	0	[c] : dad-5 -->	Forward only	Demand		DM_dad_5_c	5'-Deoxyadenosine sink	4.28885e-06	0.00111735	6.43474e-06	4.81101e-06	4.28885e-06	0.00111735	6.08196e-06	0	4.83576e-06	2.24176e-19	0.618678	4.28885e-06	0.00111735	5.86854e-06	0	4.76058e-06	8.7001e-17	0.163606	0	7.71993e-06	0.00202337	1.11027e-05	8.69437e-06	7.71993e-06	0.00202337	1.15161e-05	0	8.89334e-06	5.15253e-17	0.948453	7.13564e-06	0.00175114	1.06968e-05	0	8.13453e-06	6.26838e-243	0.702125	0	1.41768e-05
298	0		0	0	[c] : callose -->	Forward only	Demand		DM_callose_c	callose demand	0	0.00137702	2.51044e-07	0	0	0.00137702	3.92617e-07	0	0	0.000201639	0.539523	0	0.00137702	2.9701e-07	0	0	0.987078	1.20568	0	0	0.00251301	8.30801e-07	0	0	0.00251301	6.0206e-07	0	0	0.0160123	0.856087	0	0.00154282	4.92382e-07	0	0	0.0181221	0.2556	0	0
299	0		0	0	[f] : callose -->	Forward only	Demand		DM_callose_f	callose demand	0	0	0	0	0	0	0	0	0	1	NaN	0	0	0	0	0	1	NaN	0	0	0	0	0	0	0	0	0	0	1	NaN	0	0	0	0	0	1	NaN	0	0
300	1		0	0	[c] : pcb -->	Forward only	Demand		DM_pcb_c	(2R,3Z)-phycocyanobilin demand	0	0.000393434	1.21906e-06	0	0	0.000393434	1.06155e-06	0	0	0.848796	0.734208	0	0.000393434	1.04113e-06	0	0	0.00736639	0.577257	0	0	0.000718003	1.96353e-06	0	0	0.000718003	2.23216e-06	0	0	9.42461e-11	0.747464	0	0.000499359	1.4404e-06	0	0	1.24218e-31	0.049959	0	0
301	0		0	0	[h] : fe2 -->	Forward only	Demand		DM_fe2_h	fe2 demand	0	0.0330484	4.01553e-05	1.13084e-05	0	0.0330484	4.70067e-05	0	1.63591e-05	1.55595e-82	0.726673	0	0.0330484	2.84328e-05	0	7.09784e-06	5.72827e-103	0.186672	0	0	0.0603123	8.42952e-05	2.66676e-05	0	0.0603123	9.72575e-05	0	3.22119e-05	9.55958e-16	0.712974	0	0.0956549	7.76922e-05	0	2.40174e-05	1.70807e-05	0.987062	0	0
302	0		0	0	[h] : starch300 -->	Forward only	Demand		DM_starch_h	Starch demand	0	9.18012e-06	1.62842e-09	0	0	9.18012e-06	2.07563e-09	0	0	1	1.28068	0	9.18012e-06	2.13853e-09	0	0	1	1.22337	0	0	1.67534e-05	5.36457e-09	0	0	1.67534e-05	3.29127e-09	0	0	1	0.958948	0	1.02855e-05	2.05046e-09	0	0	1	0.335586	0	0
303	0		0	0	[c] : tag16018111Z180 -->	Forward only	Demand		DM_tag_c	TAG demand	0	0.000349719	1.05098e-07	0	0	0.000349719	1.21452e-07	0	0	0.834667	1.24557	0	0.000349719	1.12886e-07	0	0	0.999996	1.38268	0	0	0.000638225	2.90395e-07	0	0	0.000638225	3.36535e-07	0	0	0.725142	1.1584	0	0.000324376	1.72624e-07	0	0	0.289462	0.244667	0	0
304	0		0	0	[c] : citalald + h2o + o2 --> citalppa + h2o2 + h	Forward only	Drug metabolism - cytochrome P450	1.2.3.1	CITALALDOR	citalopram aldehyde:oxygen oxidoreductase	0	0	0	0	0	0	0	0	0	1	NaN	0	0	0	0	0	1	NaN	0	0	0	0	0	0	0	0	0	0	1	NaN	0	0	0	0	0	1	NaN	0	0
305	0		0	0	[c] : cital + o2 --> dmcital + for + h	Forward only	Drug metabolism - cytochrome P450	1.14.14.1	CITALDM	citalopram demethylase	0	0	0	0	0	0	0	0	0	1	NaN	0	0	0	0	0	1	NaN	0	0	0	0	0	0	0	0	0	0	1	NaN	0	0	0	0	0	1	NaN	0	0
306	0		0	0	[c] : cital + o2 + nadh --> citalo + h2o + nad	Forward only	Drug metabolism - cytochrome P450	1.14.14.1	CITALMO	citalopram monooxygenase	0	0	0	0	0	0	0	0	0	1	NaN	0	0	0	0	0	1	NaN	0	0	0	0	0	0	0	0	0	0	1	NaN	0	0	0	0	0	1	NaN	0	0
307	0		0	0	[c] : cital + o2 + h2o --> citalald + dma + h2o2	Forward only	Drug metabolism - cytochrome P450	1.4.3.4	CITALOR	citalopram:oxygen oxidoreductase (deaminating)	0	0	0	0	0	0	0	0	0	1	NaN	0	0	0	0	0	1	NaN	0	0	0	0	0	0	0	0	0	0	1	NaN	0	0	0	0	0	1	NaN	0	0
308	0		0	0	[c] : ddmcital + h2o + o2 --> citalald + nh4 + h2o2	Forward only	Drug metabolism - cytochrome P450	1.4.3.4	DDMCITALOR	didemethylcitalopram:oxygen oxidoreductase (deaminating)	0	0	0	0	0	0	0	0	0	1	NaN	0	0	0	0	0	1	NaN	0	0	0	0	0	0	0	0	0	0	1	NaN	0	0	0	0	0	1	NaN	0	0
309	0		0	0	[c] : dmcital + o2 --> ddmcital + for + h	Forward only	Drug metabolism - cytochrome P450	1.14.14.1	DMCITALDM	demethylcitalopram demethylase	0	0	0	0	0	0	0	0	0	1	NaN	0	0	0	0	0	1	NaN	0	0	0	0	0	0	0	0	0	0	1	NaN	0	0	0	0	0	1	NaN	0	0
310	0		0	0	[c] : dmcital + o2 + h2o --> citalald + mma + h2o2	Forward only	Drug metabolism - cytochrome P450	1.4.3.4	DMCITALOR	demethylcitalopram:oxygen oxidoreductase (deaminating)	0	0	0	0	0	0	0	0	0	1	NaN	0	0	0	0	0	1	NaN	0	0	0	0	0	0	0	0	0	0	1	NaN	0	0	0	0	0	1	NaN	0	0
311	0		0	0	[e] : lido + h2o --> 26dmani + degly + h	Forward only	Drug metabolism - cytochrome P450	3.1.1.1	LIDOAMH	lidocaine amidohydrolase	0	0	0	0	0	0	0	0	0	1	NaN	0	0	0	0	0	1	NaN	0	0	0	0	0	0	0	0	0	0	1	NaN	0	0	0	0	0	1	NaN	0	0
312	0		0	0	[c] : lido + (2) o2 --> meglyxyl + (2) for + (2) h	Forward only	Drug metabolism - cytochrome P450	1.14.14.1	LIDODM	lidocaine demethylase	0	0	0	0	0	0	0	0	0	1	NaN	0	0	0	0	0	1	NaN	0	0	0	0	0	0	0	0	0	0	1	NaN	0	0	0	0	0	1	NaN	0	0
313	0		0	0	[c] : lido + nadph + o2 + h --> 3hlido + nadp + h2o	Forward only	Drug metabolism - cytochrome P450	1.14.14.1	LIDOMO	lidocaine monooxygenase	0	0	0	0	0	0	0	0	0	1	NaN	0	0	0	0	0	1	NaN	0	0	0	0	0	0	0	0	0	0	1	NaN	0	0	0	0	0	1	NaN	0	0
314	0		0	0	[e] : meglyxyl + h2o --> 26dmani + egly + h	Forward only	Drug metabolism - cytochrome P450	3.1.1.1	MEGLYXYLAMH	monoethylglycinexylidide amidohydrolase	0	0	0	0	0	0	0	0	0	1	NaN	0	0	0	0	0	1	NaN	0	0	0	0	0	0	0	0	0	0	1	NaN	0	0	0	0	0	1	NaN	0	0
315	0		0	0	[c] : cytP450o + nadph + h <==> cytP450r + nadp	Reversible	Drug metabolism - other enzymes	1.6.2.4	CYTP450R	cytochrome P-450 reductase, cytosol	0	0	0	0	0	0	0	0	0	1	NaN	0	0	0	0	0	1	NaN	0	0	0	0	0	0	0	0	0	0	1	NaN	0	0	0	0	0	1	NaN	0	0
316	0		0	0	[c] : 56dh5flura + h2o + h --> aflburppa	Forward only	Drug metabolism - other enzymes	3.5.2.2	56DH5FLURAAMH	5,6-dihydro-5-fluorouracil amidohydrolase	0	0	0	0	0	0	0	0	0	1	NaN	0	0	0	0	0	1	NaN	0	0	0	0	0	0	0	0	0	0	1	NaN	0	0	0	0	0	1	NaN	0	0
317	0		0	0	[c] : 5flura + nadph --> 56dh5flura + nadp	Forward only	Drug metabolism - other enzymes	1.3.1.2	5FLURAOR	5-fluorouracil:NADP oxidoreductase	0	0	0	0	0	0	0	0	0	1	NaN	0	0	0	0	0	1	NaN	0	0	0	0	0	0	0	0	0	0	1	NaN	0	0	0	0	0	1	NaN	0	0
318	0		0	0	[c] : 5flura + prpp --> 5flurimp + ppi + h	Forward only	Drug metabolism - other enzymes	2.4.2.10	5FLURAPRT	5-fluorouracil phosphoribosyltransferase	0	0	0	0	0	0	0	0	0	1	NaN	0	0	0	0	0	1	NaN	0	0	0	0	0	0	0	0	0	0	1	NaN	0	0	0	0	0	1	NaN	0	0
319	0		0	0	[c] : 6mpur + prpp --> 6tins5mp + ppi	Forward only	Drug metabolism - other enzymes	2.4.2.8	6MPURPRT	6-mercaptopurine phosphoribosyltransferase	0	0	0	0	0	0	0	0	0	1	NaN	0	0	0	0	0	1	NaN	0	0	0	0	0	0	0	0	0	0	1	NaN	0	0	0	0	0	1	NaN	0	0
320	0		0	0	[c] : 6tins5mp + nad + h2o --> 6txan5mp + nadh + h	Forward only	Drug metabolism - other enzymes	1.1.1.205	6TINS5MPOR	6-thioinosine 5'-monophosphate:NAD oxidoreductase	0	0	0	0	0	0	0	0	0	1	NaN	0	0	0	0	0	1	NaN	0	0	0	0	0	0	0	0	0	0	1	NaN	0	0	0	0	0	1	NaN	0	0
321	0		0	0	[c] : 6txan5mp + atp + gln-L + h2o --> 6tgsnmp + amp + ppi + glu-L + (2) h	Forward only	Drug metabolism - other enzymes	6.3.5.2	6TXAN5MPAML	6-thioxanthine 5'-monophosphate:L-glutamine amido-ligase	0	0	0	0	0	0	0	0	0	1	NaN	0	0	0	0	0	1	NaN	0	0	0	0	0	0	0	0	0	0	1	NaN	0	0	0	0	0	1	NaN	0	0
322	0		0	0	[c] : aflburppa + h2o + h --> aflbala + co2 + nh4	Forward only	Drug metabolism - other enzymes	3.5.1.6	AFLBURPPAAMH	alpha-fluoro-beta-ureidopropionic acid amidohydrolase	0	0	0	0	0	0	0	0	0	1	NaN	0	0	0	0	0	1	NaN	0	0	0	0	0	0	0	0	0	0	1	NaN	0	0	0	0	0	1	NaN	0	0
323	0		0	0	[c] : tega + cytP450r + o2 + h --> 5flura + sucald + cytP450o + h2o	Forward only	Drug metabolism - other enzymes	1.14.14.1	TEGAMO	tegafur monooxygenase	0	0	0	0	0	0	0	0	0	1	NaN	0	0	0	0	0	1	NaN	0	0	0	0	0	0	0	0	0	0	1	NaN	0	0	0	0	0	1	NaN	0	0
324	0		0	0	[c] : tgua + prpp --> 6tgsnmp + ppi	Forward only	Drug metabolism - other enzymes	2.4.2.8	TGUAPRT	thioguanine phosphoribosyltransferase	0	0	0	0	0	0	0	0	0	1	NaN	0	0	0	0	0	1	NaN	0	0	0	0	0	0	0	0	0	0	1	NaN	0	0	0	0	0	1	NaN	0	0
325	0		0	0	[e] : h <==>	Forward only	Exchange		EX_h_e	H+ exchange	0.00540407	7.16496	0.795489	0.599628	0.00540407	7.16496	0.837684	1	0.628274	6.27639e-10	0.00191044	0.00540407	1.79561	0.754243	-1	0.732605	1.63362e-196	6.45763e-06	1	0.00754805	8.9187	2.29992	2.13518	0.00754805	8.9187	1.20771	-1	0.945829	0	0	0.0328105	0.654241	0.3847	-1	0.37814	0	0	1	-0.328885
326	1	0	0	0	[e] : h2o <==>	Forward only	Exchange		EX_h2o_e	H2O exchange	-3.99532	-0.397285	0	0	-3.99532	-0.397285	0	0	0	1	NaN	-1.31516	-0.397285	0	0	0	1	NaN	0	-5.20621	-0.717366	0	0	-5.20621	-0.717366	0	0	0	1	NaN	-1.02309	-0.701208	0	0	0	1	NaN	0	-5.63837
327	0		0	0	[e] : pi <==>	Forward only	Exchange		EX_pi_e	Phosphate exchange	-0.0121506	-0.0108795	0	0	-0.0121506	-0.0108795	0	0	0	1	NaN	-0.0121506	-0.0108795	0	0	0	1	NaN	0	-0.0219028	-0.019583	0	0	-0.0219028	-0.019583	0	0	0	1	NaN	-0.0197791	-0.0181009	0	0	0	1	NaN	0	-0.0644006
328	0		0	0	[e] : nh4 <==>	Forward only	Exchange		EX_nh4_e	ammonia exchange	-0.146378	-0.126549	0	0	-0.146378	-0.126549	0	0	0	1	NaN	-0.146378	-0.126549	0	0	0	1	NaN	0	-0.264468	-0.228281	0	0	-0.264468	-0.228281	0	0	0	1	NaN	-0.242642	-0.210757	0	0	0	1	NaN	0	-0.266227
329	1		0	0	[e] : no3 <==>	Forward only	Exchange		EX_no3_e	nitrate exchange	0	0.0165242	3.2955e-05	1.30694e-05	0	0.0165242	4.20054e-05	0	1.80212e-05	5.77034e-60	0.0566062	0	0.0165242	2.3093e-05	0	7.10748e-06	1.3405e-221	0.0115813	0	0	0.0301561	7.53914e-05	2.75508e-05	0	0.0301561	5.96756e-05	0	2.34015e-05	1.0661e-13	0.0879801	0	0.031885	7.67701e-05	0	3.04594e-05	3.45958e-34	1.32881	0	0
330	0		0	0	[e] : so4 <==>	Forward only	Exchange		EX_so4_e	sulfate exchange	-0.0100145	-0.000572111	0	0	-0.0100145	-0.000572111	0	0	0	1	NaN	-0.0100145	-0.000572111	0	0	0	1	NaN	0	-0.0182619	-0.0010298	0	0	-0.0182619	-0.0010298	0	0	0	1	NaN	-0.0180612	-0.000951859	0	0	0	1	NaN	0	-0.0291031
331	0		0	0	[e] : fe2 <==>	Forward only	Exchange		EX_fe2_e	Fe2+ exchange	-0.0330484	0	0	0	-0.0330484	0	0	0	0	1	NaN	-0.0330484	0	0	0	0	1	NaN	0	-0.0603123	0	0	0	-0.0603123	0	0	0	0	1	NaN	-0.0956549	0	0	0	0	1	NaN	0	-0.110304
332	0		0	0	[e] : fe3 <==>	Forward only	Exchange		EX_fe3_e	Fe3+ exchange	0	0	0	0	0	0	0	0	0	1	NaN	0	0	0	0	0	1	NaN	0	0	0	0	0	0	0	0	0	0	1	NaN	0	0	0	0	0	1	NaN	0	0
333	0		0	0	[e] : mg2 <==>	Forward only	Exchange		EX_mg2_e	magnesium exchange	-0.000507619	-0.000507619	0	0	-0.000507619	-0.000507619	0	0	0	1	NaN	-0.000507619	-0.000507619	0	0	0	1	NaN	0	-0.000913714	-0.000913714	0	0	-0.000913714	-0.000913714	0	0	0	1	NaN	-0.00084456	-0.00084456	0	0	0	1	NaN	0	-0.00139773
334	0		0	0	[e] : na1 <==>	Forward only	Exchange		EX_na1_e	sodium exchange	-7.30924	-0.142855	0	0	-7.30924	-0.142855	0	0	0	1	NaN	-1.93361	-0.142855	0	0	0	1	NaN	0	-9.17922	-0.255453	0	0	-9.17922	-0.255453	0	0	0	1	NaN	-0.884051	-0.251514	0	0	0	1	NaN	0	-10
335	0		0	0	[e] : photonVis <==>	Forward only	Exchange		EX_photonVis_e	photon emission	-19.2838	-19.2838	0	0	-19.2838	-19.2838	0	0	0	1	NaN	-19.2838	-19.2838	0	0	0	1	NaN	0	-27.6035	-27.6035	0	0	-27.6035	-27.6035	0	0	0	1	NaN	-27.6035	-27.6035	0	0	0	1	NaN	0	-27.6035
336	0		0	0	[e] : o2 <==>	Forward only	Exchange		EX_o2_e	O2 exchange	-4.96599	-0.256802	0	0	-4.96599	-0.256802	0	0	0	1	NaN	-1.95825	-1.21785	0	0	0	1	NaN	0	-6.27044	-0.638611	0	0	-6.27044	-0.638611	0	0	0	1	NaN	-2.77894	-2.55723	0	0	0	1	NaN	0	-10
337	1	0	0	0	[e] : co2 <==>	Forward only	Exchange		EX_co2_e	CO2 exchange	-2	-0.730812	0	0	-2	-0.730812	0	0	0	1	NaN	-2	-1.28669	0	0	0	1	NaN	0	-2	-1.32014	0	0	-2	-1.32014	0	0	0	1	NaN	-2	-1.85652	0	0	0	1	NaN	0	-2
338	0		0	0	[e] : hco3 <==>	Forward only	Exchange		EX_hco3_e	HCO3 exchange	0	0	0	0	0	0	0	0	0	1	NaN	0	0	0	0	0	1	NaN	0	0	0	0	0	0	0	0	0	0	1	NaN	0	0	0	0	0	1	NaN	0	0
339	0		0	0	[e] : ac <==>	Forward only	Exchange		EX_ac_e	Acetate exchange	0	0.0110161	3.12155e-06	1.22113e-06	0	0.0110161	4.96495e-06	0	1.30181e-06	0.000506834	0.286624	0	0.0110161	4.25023e-06	0	1.14821e-06	4.0179e-05	0.432222	0	0	0.0201041	7.09735e-06	2.12669e-06	0	0.0201041	8.95082e-06	0	2.39671e-06	6.79275e-13	0.922026	0	0.0117128	4.65541e-06	0	1.4029e-06	9.71369e-131	0.259874	0	-2
340	0		0	0	[e] : rib-D <==>	Forward only	Exchange		EX_rib_D_e	D-ribose exchange	0	0.00254219	8.05764e-07	0	0	0.00254219	9.25138e-07	0	0	1.08197e-10	1.1839	0	0.00254219	9.99719e-07	0	0	0.32476	1.03329	0	0	0.0046394	1.84102e-06	0	0	0.0046394	1.91148e-06	0	0	5.74459e-06	1.43191	0	0.00350004	9.19114e-07	0	0	5.69893e-34	0.205751	0	0
341	1		0	0	[e] : no2 <==>	Forward only	Exchange		EX_no2_e	nitrite exchange	0	0.0165242	9.35086e-06	2.5963e-06	0	0.0165242	1.25993e-05	0	3.01379e-06	4.10514e-24	0.624846	0	0.0165242	1.01459e-05	0	2.68993e-06	1.07945e-06	1.23533	0	0	0.0301561	1.62298e-05	4.98209e-06	0	0.0301561	4.89035e-05	0	2.06723e-05	0	3.16803e-09	0	0.0260877	2.01482e-05	0	5.10077e-06	1.24321e-12	0.627021	0	0
342	1		0	0	[e] : his-L <==>	Forward only	Exchange		EX_his_L_e	histidine exchange	0	0.00173939	6.07675e-07	0	0	0.00173939	6.50505e-07	0	0	0.121852	1.40317	0	0.00173939	5.26461e-07	0	0	0.940392	1.2179	0	0	0.00317433	1.03847e-06	0	0	0.00317433	2.31723e-06	0	0	2.12757e-57	0.0290847	0	0.00277261	1.38672e-06	0	0	2.29747e-07	0.552662	0	0
343	0		1	0	[e] : urea <==>	Forward only	Exchange		EX_urea_e	urea exchange	0	0.00347878	1.98269e-05	5.70103e-06	0	0.00347878	1.66004e-06	-1	0	0	1.37125e-37	0	0.00347878	3.09743e-06	-1	0	0	5.41488e-30	1	0	0.00634866	4.62349e-06	1.2285e-06	0	0.00634866	6.52532e-06	0	1.67188e-06	9.1858e-52	0.392077	0	0.00705651	6.42266e-06	0	1.68833e-06	5.77034e-60	0.282087	0	0
344	0		0	0	[e] : ad <==>	Forward only	Exchange		EX_ad_e	acetamide exchange	0	0	0	0	0	0	0	0	0	1	NaN	0	0	0	0	0	1	NaN	0	0	0	0	0	0	0	0	0	0	1	NaN	0	0	0	0	0	1	NaN	0	0
345	1		0	0	[e] : gua <==>	Forward only	Exchange		EX_gua_e	guanine exchange	0	0.0023606	1.47225e-06	0	0	0.0023606	8.68257e-07	0	0	0.0260188	0.244832	0	0.0023606	8.9345e-07	0	0	1.42428e-10	0.308751	0	0	0.00430802	1.79429e-06	0	0	0.00430802	1.41997e-06	0	0	6.35557e-06	0.992186	0	0.00412899	1.37082e-06	0	0	0.278323	0.718734	0	0
346	0		0	0	[e] : ade <==>	Forward only	Exchange		EX_ade_e	adenine exchange	0	0.00254219	1.59302e-06	0	0	0.00254219	1.4094e-06	0	0	0.573971	1.1759	0	0.00254219	1.69001e-06	0	0	0.208933	1.33125	0	0	0.0046394	3.22655e-06	0	0	0.0046394	3.17019e-06	0	0	0.0116683	1.44884	0	0.00418927	3.20313e-06	0	0	3.65948e-05	1.46894	0	0
347	1		0	0	[e] : alltt <==>	Forward only	Exchange		EX_alltt_e	allantoate exchange	0	0.00275404	1.73062e-06	0	0	0.00275404	1.87684e-06	0	0	0.00177586	1.29704	0	0.00275404	1.49813e-06	0	0	0.00688685	1.07841	0	0	0.00502602	3.57336e-06	0	0	0.00502602	3.01163e-06	0	1.02686e-06	2.27986e-05	0.931503	0	0.00482294	4.35944e-06	0	1.0797e-06	9.19694e-13	0.627331	0	0
348	1		0	0	[e] : alltn <==>	Forward only	Exchange		EX_alltn_e	allantoin exchange	0	0.00275404	1.72331e-06	0	0	0.00275404	1.45231e-06	0	0	0.246768	1.09352	0	0.00275404	2.41948e-06	0	0	2.79928e-08	0.513543	0	0	0.00502602	3.80481e-06	0	0	0.00502602	3.42525e-06	0	0	0.000130509	1.19962	0	0.00482294	2.69328e-06	0	0	3.3317e-05	0.323044	0	0
349	0		0	0	[e] : hxan <==>	Forward only	Exchange		EX_hxan_e	hypoxanthine exchange	0	0.00275404	9.82535e-07	0	0	0.00275404	8.29356e-07	0	0	0.524911	1.16152	0	0.00275404	1.08628e-06	0	0	0.417968	1.23981	0	0	0.00502602	2.02007e-06	0	0	0.00502602	1.80375e-06	0	0	1.52428e-08	1.30056	0	0.00438114	1.31976e-06	0	0	1.27587e-19	0.390582	0	0
350	1		0	0	[e] : orn <==>	Forward only	Exchange		EX_orn_e	ornithine exchange	0	0.00367205	1.22726e-06	0	0	0.00367205	1.20261e-06	0	0	0.462298	1.48095	0	0.00367205	1.38776e-06	0	0	2.75826e-05	1.20649	0	0	0.00670136	2.68694e-06	0	0	0.00670136	3.45571e-06	0	0	1.38084e-09	0.826608	0	0.00401349	1.65014e-06	0	0	9.47078e-85	0.233647	0	0
351	0		0	0	[e] : gln-L <==>	Forward only	Exchange		EX_gln_L_e	L-glutamine exchange	0	0.00367205	1.39724e-06	0	0	0.00367205	2.14537e-06	0	0	7.31814e-18	0.334882	0	0.00367205	2.07409e-06	0	0	0.0160123	0.460954	0	0	0.00670136	3.91728e-06	0	0	0.00670136	3.88398e-06	0	0	2.26073e-12	1.47511	0	0.00425133	1.90693e-06	0	0	9.47078e-85	0.0415662	0	0
352	1		0	0	[e] : urate <==>	Forward only	Exchange		EX_urate_e	urate exchange	0	0.00275404	8.36243e-07	0	0	0.00275404	8.63127e-07	0	0	0.999952	1.48095	0	0.00275404	9.8915e-07	0	0	0.875483	1.16313	0	0	0.00502602	1.94285e-06	0	0	0.00502602	2.32759e-06	0	0	0.217948	0.996628	0	0.00466609	2.78652e-06	0	0	0.658001	0.268487	0	0
353	1		0	0	[e] : leu-L <==>	Forward only	Exchange		EX_leu_L_e	L-leucine exchange	0	0.00330484	2.70362e-06	0	0	0.00330484	1.88046e-06	0	0	1.308e-11	0.431663	0	0.00330484	1.75724e-06	0	0	1.07945e-06	0.189757	0	0	0.00603123	4.12861e-06	1.08734e-06	0	0.00603123	3.62679e-06	0	1.08087e-06	0.000184985	1.16471	0	0.00288407	1.41214e-06	0	0	1.38585e-238	0.00371847	0	0
354	1		0	0	[e] : arg-L <==>	Forward only	Exchange		EX_arg_L_e	arginine exchange	0	0.0030044	9.7862e-07	0	0	0.0030044	1.295e-06	0	0	3.81886e-06	0.909177	0	0.0030044	8.7465e-07	0	0	0.300914	1.2569	0	0	0.00548293	2.25257e-06	0	0	0.00548293	2.14819e-06	0	0	1.74271e-11	1.39897	0	0.00324254	1.42932e-06	0	0	1.40182e-29	0.375726	0	0
355	1		0	0	[e] : hso3 <==>	Forward only	Exchange		EX_so3_e	sulfite exchange	0	0.00472121	5.51876e-06	1.55978e-06	0	0.00472121	5.23634e-06	0	1.58889e-06	0.00257285	1.33593	0	0.00472121	5.21413e-06	0	1.50313e-06	3.4018e-09	1.26572	0	0	0.00861604	1.37182e-05	3.35783e-06	0	0.00861604	1.10497e-05	0	3.44355e-06	1.84032e-06	0.518686	0	0.00855467	1.29326e-05	0	3.48933e-06	4.01907e-21	1.13707	0	0
356	1		0	0	[e] : s <==>	Forward only	Exchange		EX_s_e	sulfur exchange	0	0.00472121	5.51876e-06	1.55978e-06	0	0.00472121	5.23634e-06	0	1.58889e-06	0.00257285	1.33593	0	0.00472121	5.21413e-06	0	1.50313e-06	3.4018e-09	1.26572	0	0	0.00861604	1.37182e-05	3.35783e-06	0	0.00861604	1.10497e-05	0	3.44355e-06	1.84032e-06	0.518686	0	0.00855467	1.29326e-05	0	3.48933e-06	4.01907e-21	1.13707	0	0
357	0		0	0	[e] : selt <==>	Forward only	Exchange		EX_selt_e	Selenite exchange	0	0	0	0	0	0	0	0	0	1	NaN	0	0	0	0	0	1	NaN	0	0	0	0	0	0	0	0	0	0	1	NaN	0	0	0	0	0	1	NaN	0	0
358	1		0	0	[e] : etoh <==>	Forward only	Exchange		EX_etoh_e	Ethanol exchange	0	0.0110161	6.07675e-06	1.08526e-06	0	0.0110161	6.18602e-06	0	1.38711e-06	2.30162e-20	1.48095	0	0.0110161	4.79963e-06	0	1.1313e-06	5.30504e-05	0.815284	0	0	0.0201041	7.7853e-06	2.19469e-06	0	0.0201041	0.000191232	0	7.97522e-05	0	4.52509e-77	0	0.00910999	3.99293e-06	0	1.06992e-06	8.41203688800000e-314	0.111417	0	0
359	0		0	1	[e] : for <==>	Forward only	Exchange		EX_for_e	Formate exchange	0	0.0330484	3.24426e-05	9.90014e-06	0	0.0330484	4.87542e-05	0	1.75666e-05	4.83086e-149	0.0256816	0	0.0330484	2.9957e-05	0	1.08979e-05	1.02907e-07	1.09687	0	0	0.0603123	5.24371e-05	1.74773e-05	0	0.0603123	0.000134238	1	5.54816e-05	0	5.797e-11	0	0.0302068	1.48275e-05	-1	3.58323e-06	0	5.04554e-07	1	0
360	0		0	0	[e] : h2 <==>	Forward only	Exchange		EX_h2_e	H2 exchange	0	0.0330484	4.79154e-05	1.39998e-05	0	0.0330484	3.44017e-05	0	1.11983e-05	3.00007e-39	0.163322	0	0.0330484	4.93316e-05	0	1.64383e-05	7.00526e-15	1.34896	0	0	0.0603123	7.142e-05	2.10898e-05	0	0.0603123	8.28833e-05	0	2.22023e-05	0.000888384	0.852082	0	0.0416327	7.81056e-05	0	2.65377e-05	9.45493e-24	0.852668	0	0
361	0		0	0	[e] : glyclt <==>	Forward only	Exchange		EX_glyclt_e	glycolate exchange	0	0.00660969	3.16626e-06	0	0	0.00660969	2.63287e-06	0	0	0.000184985	1.01576	0	0.00660969	2.49341e-06	0	0	5.67714e-14	0.881052	0	0	0.0120625	3.82308e-06	1.28376e-06	0	0.0120625	4.4794e-06	0	1.51677e-06	1.68535e-27	1.09203	0	0.00755171	2.80988e-06	0	0	6.33759e-208	0.614701	0	0
362	0		0	0	[e] : succ <==>	Forward only	Exchange		EX_succ_e	succinate exchange	0	0.00660969	5.07085e-06	1.4095e-06	0	0.00660969	7.37355e-06	0	1.66777e-06	2.15242e-36	0.274441	0	0.00660969	6.83751e-06	0	1.47705e-06	7.25318e-09	0.451422	0	0	0.0120625	1.12448e-05	2.78762e-06	0	0.0120625	1.57266e-05	0	4.51138e-06	1.24459e-94	0.214102	0	0.00735807	5.85696e-06	0	1.68798e-06	2.0238e-156	0.00719607	0	0
363	1		0	0	[e] : lac-D <==>	Forward only	Exchange		EX_lac_D_e	D-lactate exchange	0	0.00826211	4.95205e-06	1.26891e-06	0	0.00826211	6.44797e-06	0	1.5268e-06	2.23022e-21	0.686716	0	0.00826211	5.06827e-06	0	1.41542e-06	3.21772e-10	1.43365	0	0	0.0150781	9.46023e-06	2.42896e-06	0	0.0150781	1.04341e-05	0	3.22389e-06	1.1251e-46	1.19962	0	0.00735807	6.9362e-06	0	1.57176e-06	3.76959e-100	0.381571	0	0
364	0		0	0	[e] : 6mpur <==>	Forward only	Exchange		EX_6mpur_e	6-mercaptopurine exchange	0	0	0	0	0	0	0	0	0	1	NaN	0	0	0	0	0	1	NaN	0	0	0	0	0	0	0	0	0	0	1	NaN	0	0	0	0	0	1	NaN	0	0
365	0		0	0	[e] : tgua <==>	Forward only	Exchange		EX_tgua_e	thioguanine exchange	0	0	0	0	0	0	0	0	0	1	NaN	0	0	0	0	0	1	NaN	0	0	0	0	0	0	0	0	0	0	1	NaN	0	0	0	0	0	1	NaN	0	0
366	0		0	0	[e] : tega <==>	Forward only	Exchange		EX_tega_e	tegafur exchange	0	0	0	0	0	0	0	0	0	1	NaN	0	0	0	0	0	1	NaN	0	0	0	0	0	0	0	0	0	0	1	NaN	0	0	0	0	0	1	NaN	0	0
367	0		0	0	[e] : 5flura <==>	Forward only	Exchange		EX_5flura_e	fluorouracil exchange	0	0	0	0	0	0	0	0	0	1	NaN	0	0	0	0	0	1	NaN	0	0	0	0	0	0	0	0	0	0	1	NaN	0	0	0	0	0	1	NaN	0	0
368	0		0	0	[e] : cital <==>	Forward only	Exchange		EX_cital_e	citalopram exchange	0	0	0	0	0	0	0	0	0	1	NaN	0	0	0	0	0	1	NaN	0	0	0	0	0	0	0	0	0	0	1	NaN	0	0	0	0	0	1	NaN	0	0
369	0		0	0	[e] : lido <==>	Forward only	Exchange		EX_lido_e	lidocaine exchange	0	0	0	0	0	0	0	0	0	1	NaN	0	0	0	0	0	1	NaN	0	0	0	0	0	0	0	0	0	0	1	NaN	0	0	0	0	0	1	NaN	0	0
370	1		0	0	[e] : ascb-L <==>	Forward only	Exchange		EX_ascb_e	Ascorbate exchange	0	0.00275404	8.44635e-06	2.57813e-06	0	0.00275404	7.87463e-06	0	2.81355e-06	4.29873e-13	1.06974	0	0.00275404	8.30704e-06	0	2.46507e-06	0.000549805	1.38688	0	0	0.00502602	1.3905e-05	4.96581e-06	0	0.00502602	1.4219e-05	0	5.57943e-06	4.09836e-16	1.37968	0	0.00322432	1.06127e-05	0	3.79928e-06	3.60311e-36	0.0347212	0	0
371	0		0	0	[e] : xan <==>	Forward only	Exchange		EX_xan_e	Xanthine exchange	0	0.00275404	1.41416e-06	0	0	0.00275404	8.19279e-07	0	0	0.0034362	0.26875	0	0.00275404	1.2705e-06	0	0	0.000758289	1.20537	0	0	0.00502602	1.53709e-06	0	0	0.00502602	1.43715e-06	0	0	0.0245213	1.36003	0	0.00451913	2.44145e-06	0	0	9.48394e-06	0.166332	0	0
372	1		0	0	[e] : ura <==>	Forward only	Exchange		EX_ura_e	Uracil exchange	0	0.00660969	3.87756e-06	0	0	0.00660969	2.43416e-06	0	0	2.31708e-09	0.357974	0	0.00660969	2.80419e-06	0	0	1.56614e-20	0.635436	0	0	0.0120625	6.34209e-06	1.30168e-06	0	0.0120625	5.14363e-06	0	1.53114e-06	1.24321e-12	0.93525	0	0.0057393	3.13385e-06	0	0	3.81662e-183	0.0556434	0	0
373	0		0	0	[e] : meoh <==>	Forward only	Exchange		EX_meoh_e	Methanol exchange	3.81231e-08	3.81231e-08	0	0	3.81231e-08	3.81231e-08	0	0	0	1	NaN	3.81231e-08	3.81231e-08	0	0	0	1	NaN	0	6.86216e-08	6.86216e-08	0	0	6.86216e-08	6.86216e-08	0	0	0	1	NaN	6.34279e-08	6.34279e-08	0	0	0	1	NaN	0	1.26016e-07
374	1		0	0	[e] : ncam <==>	Forward only	Exchange		EX_ncam_e	Nicotinamide exchange	0	0.00254219	6.36299e-06	1.866e-06	0	0.00254219	5.70428e-06	0	1.9268e-06	5.47734e-12	0.872254	0	0.00254219	6.6513e-06	0	1.97246e-06	0.000596179	1.21217	0	0	0.0046394	1.13312e-05	3.48897e-06	0	0.0046394	1.14188e-05	0	4.29777e-06	5.93979e-21	1.45889	0	0.0031885	8.2498e-06	0	2.60499e-06	2.59243e-47	0.0372897	0	0
375	0		0	1	[e] : nmn <==>	Forward only	Exchange		EX_nmn_e	Nicotinamide mononucleotide exchange	0	0.00127109	6.80207e-07	0	0	0.00127109	1.19314e-06	0	0	6.11361e-18	0.110382	0	0.00127109	1.10536e-06	0	0	0.00369027	0.205363	0	0	0.0023197	2.64955e-06	0	0	0.0023197	1.45621e-06	-1	0	4.85876e-16	0.0488466	0	0.00167816	1.49088e-06	-1	0	9.4571e-38	0.0335269	1	0
376	0		0	0	[e] : thm <==>	Forward only	Exchange		EX_thm_e	Thiamine exchange	0	0	0	0	0	0	0	0	0	1	NaN	0	0	0	0	0	1	NaN	0	0	0	0	0	0	0	0	0	0	1	NaN	0	0	0	0	0	1	NaN	0	0
377	0		0	0	[e] : pheme <==>	Forward only	Exchange		EX_pheme_e	Heme exchange	0	0	0	0	0	0	0	0	0	1	NaN	0	0	0	0	0	1	NaN	0	0	0	0	0	0	0	0	0	0	1	NaN	0	0	0	0	0	1	NaN	0	0
378	0		0	0	[e] : biliverd <==>	Forward only	Exchange		EX_biliverd_e	Biliverdin exchange	0	0	0	0	0	0	0	0	0	1	NaN	0	0	0	0	0	1	NaN	0	0	0	0	0	0	0	0	0	0	1	NaN	0	0	0	0	0	1	NaN	0	0
379	0		0	1	[e] : co <==>	Forward only	Exchange		EX_co_e	Carbon monoxide exchange	0	1.26919	0.0511082	0.0284663	0	1.26919	0.0495355	0	0.0296181	0.000201639	0.641894	0.555874	1.26919	1.194	0	1.21879	0	0	0	0	0.679859	0.241164	0.227854	0	0.679859	0.0269741	-1	0.0170125	0	0	0.638638	0.78212	0.77074	1	0.774696	0	0	1	0
380	1		0	0	[h] : 3hdecACP <==> tdec2eACP + h2o	Reversible	Fatty acid biosynthesis	4.2.1.60;2.3.1.-	3HAD100	3-hydroxyacyl-[acyl-carrier-protein] dehydratase (n-C10:0)	-6.22301e-19	0.0023606	3.68984e-05	1.70204e-05	5.60688e-19	0.0023606	3.9741e-05	0	1.92284e-05	4.28089e-15	0.35554	-1.40916e-18	0.0023606	3.36849e-05	0	1.52964e-05	1.86879e-15	0.205574	0	-1.65111e-18	0.00430802	6.43855e-05	3.17482e-05	0	0.00430802	7.2286e-05	0	3.73584e-05	4.95775e-25	0.0698852	-2.55882e-19	0.0124361	0.000219956	0	0.000105761	0	8.1498e-92	0	-2.54749e-18
381	1		0	0	[h] : 3hddecACP <==> tddec2eACP + h2o	Reversible	Fatty acid biosynthesis	4.2.1.60;2.3.1.-	3HAD120	3-hydroxyacyl-[acyl-carrier-protein] dehydratase (n-C12:0)	-6.22301e-19	0.0023606	3.68984e-05	1.70204e-05	5.60688e-19	0.0023606	3.9741e-05	0	1.92284e-05	4.28089e-15	0.35554	-1.40916e-18	0.0023606	3.36849e-05	0	1.52964e-05	1.86879e-15	0.205574	0	-1.65111e-18	0.00430802	6.43855e-05	3.17482e-05	0	0.00430802	7.2286e-05	0	3.73584e-05	4.95775e-25	0.0698852	-2.55882e-19	0.0124361	0.000219956	0	0.000105761	0	8.1498e-92	0	-2.54749e-18
382	1		0	0	[h] : 3hmrsACP <==> tmrs2eACP + h2o	Reversible	Fatty acid biosynthesis	2.3.1.-	3HAD140	3-hydroxyacyl-[acyl-carrier-protein] dehydratase (n-C14:0)	-6.22301e-19	0.0023606	3.68984e-05	1.70204e-05	5.60688e-19	0.0023606	3.9741e-05	0	1.92284e-05	4.28089e-15	0.35554	-1.40916e-18	0.0023606	3.36849e-05	0	1.52964e-05	1.86879e-15	0.205574	0	-1.65111e-18	0.00430802	6.43855e-05	3.17482e-05	0	0.00430802	7.2286e-05	0	3.73584e-05	4.95775e-25	0.0698852	-2.55882e-19	0.0124361	0.000219956	0	0.000105761	0	8.1498e-92	0	-2.54749e-18
383	1		0	0	[h] : 3hpalmACP <==> tpalm2eACP + h2o	Reversible	Fatty acid biosynthesis	2.3.1.-	3HAD160	3-hydroxyacyl-[acyl-carrier-protein] dehydratase (n-C16:0)	-6.22301e-19	0.0023606	3.68984e-05	1.70204e-05	5.60688e-19	0.0023606	3.9741e-05	0	1.92284e-05	4.28089e-15	0.35554	-1.40916e-18	0.0023606	3.36849e-05	0	1.52964e-05	1.86879e-15	0.205574	0	-1.65111e-18	0.00430802	6.43855e-05	3.17482e-05	0	0.00430802	7.2286e-05	0	3.73584e-05	4.95775e-25	0.0698852	-2.55882e-19	0.0124361	0.000219956	0	0.000105761	0	8.1498e-92	0	-2.54749e-18
384	1		0	0	[h] : 3hbutACP <==> but2eACP + h2o	Reversible	Fatty acid biosynthesis	2.3.1.-	3HAD40	3-hydroxyacyl-[acyl-carrier-protein] dehydratase (n-C4:0)	0	0.0023606	3.68984e-05	1.70204e-05	0	0.0023606	3.9741e-05	0	1.92284e-05	4.28089e-15	0.35554	0	0.0023606	3.36849e-05	0	1.52964e-05	1.86879e-15	0.205574	0	0	0.00430802	6.43855e-05	3.17482e-05	-6.27684e-19	0.00430802	7.2286e-05	0	3.73584e-05	4.95775e-25	0.0698852	0	0.0124361	0.000219956	0	0.000105761	0	8.1498e-92	0	0
385	1		0	0	[h] : 3hhexACP <==> thex2eACP + h2o	Reversible	Fatty acid biosynthesis	2.3.1.-	3HAD60	3-hydroxyacyl-[acyl-carrier-protein] dehydratase (n-C6:0)	0	0.0023606	3.68984e-05	1.70204e-05	0	0.0023606	3.9741e-05	0	1.92284e-05	4.28089e-15	0.35554	0	0.0023606	3.36849e-05	0	1.52964e-05	1.86879e-15	0.205574	0	0	0.00430802	6.43855e-05	3.17482e-05	-6.27684e-19	0.00430802	7.2286e-05	0	3.73584e-05	4.95775e-25	0.0698852	0	0.0124361	0.000219956	0	0.000105761	0	8.1498e-92	0	0
386	1		0	0	[h] : 3hoctACP <==> toct2eACP + h2o	Reversible	Fatty acid biosynthesis	2.3.1.-;4.2.1.59	3HAD80	3-hydroxyacyl-[acyl-carrier-protein] dehydratase (n-C8:0)	-6.22301e-19	0.0023606	3.68984e-05	1.70204e-05	5.60688e-19	0.0023606	3.9741e-05	0	1.92284e-05	4.28089e-15	0.35554	-1.40916e-18	0.0023606	3.36849e-05	0	1.52964e-05	1.86879e-15	0.205574	0	-1.65111e-18	0.00430802	6.43855e-05	3.17482e-05	0	0.00430802	7.2286e-05	0	3.73584e-05	4.95775e-25	0.0698852	-2.55882e-19	0.0124361	0.000219956	0	0.000105761	0	8.1498e-92	0	-2.54749e-18
387	1		0	0	[h] : 3odecACP + nadph + h <==> 3hdecACP + nadp	Reversible	Fatty acid biosynthesis	1.1.1.100;2.3.1.-	3OAR100	3-oxoacyl-[acyl-carrier-protein] reductase (n-C10:0)	-6.22301e-19	0.0023606	3.68984e-05	1.70204e-05	5.60688e-19	0.0023606	3.9741e-05	0	1.92284e-05	4.28089e-15	0.35554	-1.40916e-18	0.0023606	3.36849e-05	0	1.52964e-05	1.86879e-15	0.205574	0	-1.65111e-18	0.00430802	6.43855e-05	3.17482e-05	0	0.00430802	7.2286e-05	0	3.73584e-05	4.95775e-25	0.0698852	-2.55882e-19	0.0124361	0.000219956	0	0.000105761	0	8.1498e-92	0	-2.54749e-18
388	1		0	0	[h] : 3oddecACP + nadph + h <==> 3hddecACP + nadp	Reversible	Fatty acid biosynthesis	1.1.1.100;2.3.1.-	3OAR120	3-oxoacyl-[acyl-carrier-protein] reductase (n-C12:0)	-6.22301e-19	0.0023606	3.68984e-05	1.70204e-05	5.60688e-19	0.0023606	3.9741e-05	0	1.92284e-05	4.28089e-15	0.35554	-1.40916e-18	0.0023606	3.36849e-05	0	1.52964e-05	1.86879e-15	0.205574	0	-1.65111e-18	0.00430802	6.43855e-05	3.17482e-05	0	0.00430802	7.2286e-05	0	3.73584e-05	4.95775e-25	0.0698852	-2.55882e-19	0.0124361	0.000219956	0	0.000105761	0	8.1498e-92	0	-2.54749e-18
389	1		0	0	[h] : 3omrsACP + nadph + h <==> 3hmrsACP + nadp	Reversible	Fatty acid biosynthesis	1.1.1.100;2.3.1.-	3OAR140	3-oxoacyl-[acyl-carrier-protein] reductase (n-C14:0)	-6.22301e-19	0.0023606	3.68984e-05	1.70204e-05	5.60688e-19	0.0023606	3.9741e-05	0	1.92284e-05	4.28089e-15	0.35554	-1.40916e-18	0.0023606	3.36849e-05	0	1.52964e-05	1.86879e-15	0.205574	0	-1.65111e-18	0.00430802	6.43855e-05	3.17482e-05	0	0.00430802	7.2286e-05	0	3.73584e-05	4.95775e-25	0.0698852	-2.55882e-19	0.0124361	0.000219956	0	0.000105761	0	8.1498e-92	0	-2.54749e-18
390	1		0	0	[h] : 3opalmACP + nadph + h <==> 3hpalmACP + nadp	Reversible	Fatty acid biosynthesis	1.1.1.100;2.3.1.-	3OAR160	3-oxoacyl-[acyl-carrier-protein] reductase (n-C16:0)	-6.22301e-19	0.0023606	3.68984e-05	1.70204e-05	5.60688e-19	0.0023606	3.9741e-05	0	1.92284e-05	4.28089e-15	0.35554	-1.40916e-18	0.0023606	3.36849e-05	0	1.52964e-05	1.86879e-15	0.205574	0	-1.65111e-18	0.00430802	6.43855e-05	3.17482e-05	0	0.00430802	7.2286e-05	0	3.73584e-05	4.95775e-25	0.0698852	-2.55882e-19	0.0124361	0.000219956	0	0.000105761	0	8.1498e-92	0	-2.54749e-18
391	1		0	0	[h] : actACP + nadph + h <==> 3hbutACP + nadp	Reversible	Fatty acid biosynthesis	1.1.1.100;2.3.1.-	3OAR40	3-oxoacyl-[acyl-carrier-protein] reductase (n-C4:0)	0	0.0023606	3.68984e-05	1.70204e-05	0	0.0023606	3.9741e-05	0	1.92284e-05	4.28089e-15	0.35554	0	0.0023606	3.36849e-05	0	1.52964e-05	1.86879e-15	0.205574	0	0	0.00430802	6.43855e-05	3.17482e-05	-6.27684e-19	0.00430802	7.2286e-05	0	3.73584e-05	4.95775e-25	0.0698852	0	0.0124361	0.000219956	0	0.000105761	0	8.1498e-92	0	0
392	1		0	0	[h] : 3ohexACP + nadph + h <==> 3hhexACP + nadp	Reversible	Fatty acid biosynthesis	1.1.1.100;2.3.1.-	3OAR60	3-oxoacyl-[acyl-carrier-protein] reductase (n-C6:0)	0	0.0023606	3.68984e-05	1.70204e-05	0	0.0023606	3.9741e-05	0	1.92284e-05	4.28089e-15	0.35554	0	0.0023606	3.36849e-05	0	1.52964e-05	1.86879e-15	0.205574	0	0	0.00430802	6.43855e-05	3.17482e-05	-6.27684e-19	0.00430802	7.2286e-05	0	3.73584e-05	4.95775e-25	0.0698852	0	0.0124361	0.000219956	0	0.000105761	0	8.1498e-92	0	0
393	1		0	0	[h] : 3ooctACP + nadph + h <==> 3hoctACP + nadp	Reversible	Fatty acid biosynthesis	1.1.1.100;2.3.1.-	3OAR80	3-oxoacyl-[acyl-carrier-protein] reductase (n-C8:0)	-6.22301e-19	0.0023606	3.68984e-05	1.70204e-05	5.60688e-19	0.0023606	3.9741e-05	0	1.92284e-05	4.28089e-15	0.35554	-1.40916e-18	0.0023606	3.36849e-05	0	1.52964e-05	1.86879e-15	0.205574	0	-1.65111e-18	0.00430802	6.43855e-05	3.17482e-05	0	0.00430802	7.2286e-05	0	3.73584e-05	4.95775e-25	0.0698852	-2.55882e-19	0.0124361	0.000219956	0	0.000105761	0	8.1498e-92	0	-2.54749e-18
394	0		0	1	[h] : accoa + cbtnCCP + h <==> malcoa + btnCCP	Reversible	Fatty acid biosynthesis	6.4.1.2	ACCOAC	acetyl-CoA carboxylase (biotin-dependent)	2.71496e-27	0.0179898	0.00120529	0.00113092	1.3103e-26	0.0179898	0.0011527	0	0.00108098	9.45493e-24	0.000850049	-1.65568e-26	0.0179898	0.00119147	0	0.00107774	5.75792e-16	0.637807	0	3.5606e-27	0.0327941	0.00225612	0.00203501	0	0.0327941	0.00195797	-1	0.0018108	4.82708e-117	7.63315e-33	-9.79166e-29	0.0931557	0.00279832	1	0.00210169	8.15111e-08	4.8815e-23	1	-8.69288e-33
395	0		0	1	[h] : malcoa + ACP <==> coa + malACP	Reversible	Fatty acid biosynthesis	2.3.1.39;2.3.1.-	MCOATA	malonyl-CoA:[acyl-carrier-protein] S-malonyltransferase	0.00109687	0.0179898	0.0016419	0.00150933	0.00109687	0.0179898	0.00162403	0	0.00148758	2.49491e-22	0.453911	0.00109687	0.0179898	0.00168995	0	0.00155755	1.89679e-74	0.000883966	0	0.00197437	0.0327941	0.00309813	0.00287344	0.00197437	0.0327941	0.00280475	-1	0.00256588	7.71634e-297	1.34021e-33	0.00182494	0.0931557	0.00381976	1	0.00300102	1.74622e-70	7.79206e-39	1	0.00362571
396	0		0	0	[m] : accoa + cbtnCCP + h <==> malcoa + btnCCP	Reversible	Fatty acid biosynthesis	6.4.1.2	ACCOACm	acetyl-CoA carboxylase (biotin-dependent)	1.14369e-07	1.14369e-07	0	0	1.14369e-07	1.14369e-07	0	0	0	1	NaN	1.14369e-07	1.14369e-07	0	0	0	1	NaN	0	2.05865e-07	2.05865e-07	0	0	2.05865e-07	2.05865e-07	0	0	0	1	NaN	1.90284e-07	1.90284e-07	0	0	0	1	NaN	0	3.78047e-07
397	0		0	0	[m] : malcoa + ACP <==> coa + malACP	Reversible	Fatty acid biosynthesis	2.3.1.39;2.3.1.-	MCOATAm	malonyl-CoA:[acyl-carrier-protein] S-malonyltransferase	7.62462e-08	7.62462e-08	0	0	7.62462e-08	7.62462e-08	0	0	0	1	NaN	7.62462e-08	7.62462e-08	0	0	0	1	NaN	0	1.37243e-07	1.37243e-07	0	0	1.37243e-07	1.37243e-07	0	0	0	1	NaN	1.26856e-07	1.26856e-07	0	0	0	1	NaN	0	2.52031e-07
398	0		0	0	[h] : 3hoctaACP --> toctd2eACP + h2o	Forward only	Fatty acid biosynthesis	2.3.1.-	3HAD180	3-hydroxyacyl-[acyl-carrier-protein] dehydratase (n-C18:0)	0	0.00399353	0.000285493	0.000286539	0	0.00399353	0.00024746	-1	0.000250605	6.18268e-122	9.40331e-78	0	0.00399353	0.000355984	1	0.000305728	8.89974e-206	2.52597e-114	1	0	0.00720057	0.000670623	0.000560756	0	0.00720057	0.000321695	-1	0.000299635	0	0	0	0.0065817	0.000453713	-1	0.00037352	0	4.05904e-235	1	0
399	1		0	0	[h] : 3hcvac11eACP --> h2o + t3c11vaceACP	Forward only	Fatty acid biosynthesis	2.3.1.-	3HAD181	3-hydroxyacyl-[acyl-carrier-protein] dehydratase ((11Z)-n-C18:1)	0.00109687	0.00158648	0.00109812	0.00109727	0.00109687	0.00158648	0.00109838	0	0.00109739	6.50018e-45	0.342311	0.00109687	0.00158648	0.00109817	0	0.00109733	1.24321e-12	1.23533	0	0.00197437	0.00286789	0.00197681	0.00197525	0.00197437	0.00286789	0.00197706	0	0.00197541	1.05649e-19	0.892685	0.00182494	0.00229913	0.00182635	0	0.00182544	0	0	0	0.00362571
400	0		0	0	[h] : 3ooctdACP + nadph + h --> 3hoctaACP + nadp	Forward only	Fatty acid biosynthesis	1.1.1.100;2.3.1.-	3OAR180	3-oxoacyl-[acyl-carrier-protein] reductase (n-C18:0)	0	0.00399353	0.000285493	0.000286539	0	0.00399353	0.00024746	-1	0.000250605	6.18268e-122	9.40331e-78	0	0.00399353	0.000355984	1	0.000305728	8.89974e-206	2.52597e-114	1	0	0.00720057	0.000670623	0.000560756	0	0.00720057	0.000321695	-1	0.000299635	0	0	0	0.0065817	0.000453713	-1	0.00037352	0	4.05904e-235	1	0
401	1		0	0	[h] : 3ocvac11eACP + nadph --> 3hcvac11eACP + nadp	Forward only	Fatty acid biosynthesis	1.1.1.100;2.3.1.-	3OAR181	3-oxoacyl-[acyl-carrier-protein] reductase ((11Z)-n-C18:1)	0.00109687	0.00158648	0.00109812	0.00109727	0.00109687	0.00158648	0.00109838	0	0.00109739	6.50018e-45	0.342311	0.00109687	0.00158648	0.00109817	0	0.00109733	1.24321e-12	1.23533	0	0.00197437	0.00286789	0.00197681	0.00197525	0.00197437	0.00286789	0.00197706	0	0.00197541	1.05649e-19	0.892685	0.00182494	0.00229913	0.00182635	0	0.00182544	0	0	0	0.00362571
402	1		0	0	[h] : ocACP + malACP --> 3odecACP + co2 + ACP	Forward only	Fatty acid biosynthesis	2.3.1.180;2.3.1.41;2.3.1.-	3OAS100	3-oxoacyl-[acyl-carrier-protein] synthase (n-C10:0)	0	0.0023606	3.68984e-05	1.70204e-05	5.60688e-19	0.0023606	3.9741e-05	0	1.92284e-05	4.28089e-15	0.35554	0	0.0023606	3.36849e-05	0	1.52964e-05	1.86879e-15	0.205574	0	0	0.00430802	6.43855e-05	3.17482e-05	0	0.00430802	7.2286e-05	0	3.73584e-05	4.95775e-25	0.0698852	0	0.0124361	0.000219956	0	0.000105761	0	8.1498e-92	0	0
403	1		0	0	[h] : dcaACP + malACP --> 3oddecACP + co2 + ACP	Forward only	Fatty acid biosynthesis	2.3.1.180;2.3.1.41;2.3.1.-	3OAS120	3-oxoacyl-[acyl-carrier-protein] synthase (n-C12:0)	0	0.0023606	3.68984e-05	1.70204e-05	5.60688e-19	0.0023606	3.9741e-05	0	1.92284e-05	4.28089e-15	0.35554	0	0.0023606	3.36849e-05	0	1.52964e-05	1.86879e-15	0.205574	0	0	0.00430802	6.43855e-05	3.17482e-05	0	0.00430802	7.2286e-05	0	3.73584e-05	4.95775e-25	0.0698852	0	0.0124361	0.000219956	0	0.000105761	0	8.1498e-92	0	0
404	1		0	0	[h] : ddcaACP + malACP --> 3omrsACP + co2 + ACP	Forward only	Fatty acid biosynthesis	2.3.1.180;2.3.1.41;2.3.1.-	3OAS140	3-oxoacyl-[acyl-carrier-protein] synthase (n-C14:0)	0	0.0023606	3.68984e-05	1.70204e-05	5.60688e-19	0.0023606	3.9741e-05	0	1.92284e-05	4.28089e-15	0.35554	0	0.0023606	3.36849e-05	0	1.52964e-05	1.86879e-15	0.205574	0	0	0.00430802	6.43855e-05	3.17482e-05	0	0.00430802	7.2286e-05	0	3.73584e-05	4.95775e-25	0.0698852	0	0.0124361	0.000219956	0	0.000105761	0	8.1498e-92	0	0
405	1		0	0	[h] : myrsACP + malACP --> 3opalmACP + co2 + ACP	Forward only	Fatty acid biosynthesis	2.3.1.180;2.3.1.41;2.3.1.-	3OAS160	3-oxoacyl-[acyl-carrier-protein] synthase (n-C16:0)	0	0.0023606	3.68984e-05	1.70204e-05	5.60688e-19	0.0023606	3.9741e-05	0	1.92284e-05	4.28089e-15	0.35554	0	0.0023606	3.36849e-05	0	1.52964e-05	1.86879e-15	0.205574	0	0	0.00430802	6.43855e-05	3.17482e-05	0	0.00430802	7.2286e-05	0	3.73584e-05	4.95775e-25	0.0698852	0	0.0124361	0.000219956	0	0.000105761	0	8.1498e-92	0	0
406	0		0	0	[h] : palmACP + malACP --> 3ooctdACP + ACP + co2	Forward only	Fatty acid biosynthesis	2.3.1.-;2.3.1.41	3OAS180	3-oxoacyl-[acyl-carrier-protein] synthase (n-C18:0)	0	0.00399353	0.000285493	0.000286539	0	0.00399353	0.00024746	-1	0.000250605	6.18268e-122	9.40331e-78	0	0.00399353	0.000355984	1	0.000305728	8.89974e-206	2.52597e-114	1	0	0.00720057	0.000670623	0.000560756	0	0.00720057	0.000321695	-1	0.000299635	0	0	0	0.0065817	0.000453713	-1	0.00037352	0	4.05904e-235	1	0
407	1		0	0	[h] : hdeACP + malACP + h --> 3ocvac11eACP + ACP + co2	Forward only	Fatty acid biosynthesis	2.3.1.-;2.3.1.41	3OAS181	3-oxoacyl-[acyl-carrier-protein] synthase ((11Z)-n-C18:1)	0.00109687	0.00158648	0.00109812	0.00109727	0.00109687	0.00158648	0.00109838	0	0.00109739	6.50018e-45	0.342311	0.00109687	0.00158648	0.00109817	0	0.00109733	1.24321e-12	1.23533	0	0.00197437	0.00286789	0.00197681	0.00197525	0.00197437	0.00286789	0.00197706	0	0.00197541	1.05649e-19	0.892685	0.00182494	0.00229913	0.00182635	0	0.00182544	0	0	0	0.00362571
408	1		0	0	[h] : butACP + malACP --> 3ohexACP + co2 + ACP	Forward only	Fatty acid biosynthesis	2.3.1.180;2.3.1.41;2.3.1.-	3OAS60	3-oxoacyl-[acyl-carrier-protein] synthase (n-C6:0)	0	0.0023606	3.68984e-05	1.70204e-05	0	0.0023606	3.9741e-05	0	1.92284e-05	4.28089e-15	0.35554	0	0.0023606	3.36849e-05	0	1.52964e-05	1.86879e-15	0.205574	0	0	0.00430802	6.43855e-05	3.17482e-05	0	0.00430802	7.2286e-05	0	3.73584e-05	4.95775e-25	0.0698852	0	0.0124361	0.000219956	0	0.000105761	0	8.1498e-92	0	0
409	1		0	0	[h] : hexACP + malACP --> 3ooctACP + co2 + ACP	Forward only	Fatty acid biosynthesis	2.3.1.180;2.3.1.41;2.3.1.-	3OAS80	3-oxoacyl-[acyl-carrier-protein] synthase (n-C8:0)	0	0.0023606	3.68984e-05	1.70204e-05	5.60688e-19	0.0023606	3.9741e-05	0	1.92284e-05	4.28089e-15	0.35554	0	0.0023606	3.36849e-05	0	1.52964e-05	1.86879e-15	0.205574	0	0	0.00430802	6.43855e-05	3.17482e-05	0	0.00430802	7.2286e-05	0	3.73584e-05	4.95775e-25	0.0698852	0	0.0124361	0.000219956	0	0.000105761	0	8.1498e-92	0	0
410	1		0	0	[h] : accoa + ACP --> coa + acACP	Forward only	Fatty acid biosynthesis	2.3.1.180;2.3.1.-	ACOATA	beta-ketoacyl-acyl-carrier-protein synthase III	0	0.0023606	3.68984e-05	1.70204e-05	0	0.0023606	3.9741e-05	0	1.92284e-05	4.28089e-15	0.35554	0	0.0023606	3.36849e-05	0	1.52964e-05	1.86879e-15	0.205574	0	0	0.00430802	6.43855e-05	3.17482e-05	0	0.00430802	7.2286e-05	0	3.73584e-05	4.95775e-25	0.0698852	0	0.0124361	0.000219956	0	0.000105761	0	8.1498e-92	0	0
411	1		0	0	[h] : palmACP + fdxox + o2 + (4) nadph --> hdeACP + fdxrd + (2) h2o + (4) nadp	Forward only	Fatty acid biosynthesis	1.14.19.2	ACP1619ZD9DS	acyl-[acyl-carrier-protein] delta9-desaturase ((9Z)-n-C16:1)	0.00111214	0.00160175	0.00111339	0.00111254	0.00111214	0.00160175	0.00111365	0	0.00111266	6.50018e-45	0.342311	0.00111214	0.00160175	0.00111344	0	0.0011126	1.24321e-12	1.23533	0	0.00200186	0.00289537	0.0020043	0.00200274	0.00200186	0.00289537	0.00200455	0	0.0020029	1.05649e-19	0.892685	0.00185035	0.00232454	0.00185176	0	0.00185085	0	0	0	0.00367619
412	1		0	0	[h] : ocdcaACP + fdxox + o2 + (4) nadph --> octe9ACP + fdxrd + (2) h2o + (4) nadp	Forward only	Fatty acid biosynthesis	1.14.19.2	ACP1819ZD9DS	stearoyl-[acyl-carrier-protein] delta9-desaturase ((9Z)-n-C18:1)	0	0.00362487	3.43259e-05	1.49375e-05	0	0.00362487	3.67843e-05	0	1.94867e-05	6.37195e-44	0.38978	0	0.00362487	0.000162949	0	7.89968e-05	0	0	0	0	0.00653699	0.000230244	5.5699e-05	0	0.00653699	7.19248e-05	0	3.79887e-05	8.72500000000000e-321	1.44706e-225	0	0.00597138	0.000291723	0	0.000199046	0	2.24133e-26	0	0
413	0		0	1	[h] : atp + btnCCP + hco3 --> adp + pi + cbtnCCP + h	Forward only	Fatty acid biosynthesis	6.3.4.14	BTNC	biotin carboxylase	0	0.0179898	0.00120529	0.00113092	0	0.0179898	0.0011527	0	0.00108098	9.45493e-24	0.000850049	0	0.0179898	0.00119147	0	0.00107774	5.75792e-16	0.637807	0	0	0.0327941	0.00225612	0.00203501	0	0.0327941	0.00195797	-1	0.0018108	4.82708e-117	7.63315e-33	0	0.0931557	0.00279832	1	0.00210169	8.15111e-08	4.8815e-23	1	0
414	0		0	0	[h] : tdec2eACP + nadh + h --> dcaACP + nad	Forward only	Fatty acid biosynthesis	1.3.1.9;2.3.1.-	EAR100x	enoyl-[acyl-carrier-protein] reductase (NADH) (n-C10:0)	0	0.0023606	4.73508e-06	2.07253e-06	0	0.0023606	7.19417e-06	0	3.31056e-06	9.71369e-131	5.21362e-07	0	0.0023606	3.79955e-06	0	1.3287e-06	3.2136e-99	0.0869741	0	0	0.00430802	1.20078e-05	5.65183e-06	0	0.00430802	6.05039e-05	1	2.9163e-05	0	8.19106e-89	0	0.0124361	3.44945e-05	1	1.43927e-05	0	1.47799e-27	1	0
415	0		0	1	[h] : tdec2eACP + nadph + h --> dcaACP + nadp	Forward only	Fatty acid biosynthesis	1.3.1.10;2.3.1.-	EAR100y	enoyl-[acyl-carrier-protein] reductase (NADPH) (n-C10:0)	0	0.0023606	3.20508e-05	1.38751e-05	0	0.0023606	3.24901e-05	0	1.41074e-05	0.00257285	1.35468	0	0.0023606	2.96666e-05	0	1.291e-05	3.81886e-06	0.429694	0	0	0.00430802	5.23549e-05	2.33137e-05	0	0.00430802	1.17561e-05	-1	5.35649e-06	0	1.12216e-63	0	0.0124361	0.000185455	1	8.24888e-05	0	1.71667e-72	1	0
416	0		0	0	[h] : tddec2eACP + nadh + h --> ddcaACP + nad	Forward only	Fatty acid biosynthesis	1.3.1.9;2.3.1.-	EAR120x	enoyl-[acyl-carrier-protein] reductase (NADH) (n-C12:0)	0	0.0023606	5.57118e-06	2.4388e-06	0	0.0023606	6.74075e-06	1	3.21693e-06	6.37195e-44	0.0489871	0	0.0023606	3.43803e-06	-1	1.11927e-06	8.1784e-254	9.95381e-06	1	0	0.00430802	1.55376e-05	7.09521e-06	0	0.00430802	6.39337e-05	1	3.11274e-05	0	1.51478e-80	0	0.0124361	3.71539e-05	1	1.52285e-05	1.7359e-289	2.02087e-21	1	0
417	0		0	1	[h] : tddec2eACP + nadph + h --> ddcaACP + nadp	Forward only	Fatty acid biosynthesis	1.3.1.10;2.3.1.-	EAR120y	enoyl-[acyl-carrier-protein] reductase (NADPH) (n-C12:0)	0	0.0023606	3.12345e-05	1.33675e-05	0	0.0023606	3.29406e-05	0	1.45479e-05	2.31708e-09	0.758116	0	0.0023606	2.99882e-05	0	1.31835e-05	0.278323	0.89222	0	0	0.00430802	4.88324e-05	2.17094e-05	0	0.00430802	8.30475e-06	-1	3.94338e-06	0	1.94574e-70	0	0.0124361	0.000182798	1	8.15448e-05	0	2.03692e-74	1	0
418	0		0	1	[h] : tmrs2eACP + nadh + h --> myrsACP + nad	Forward only	Fatty acid biosynthesis	1.3.1.9;2.3.1.-	EAR140x	enoyl-[acyl-carrier-protein] reductase (NADH) (n-C14:0)	0	0.0023606	5.11212e-06	2.07469e-06	0	0.0023606	6.16102e-06	0	2.84912e-06	4.03224e-49	0.0738292	0	0.0023606	3.09544e-06	0	0	8.01419e-274	8.4437e-05	0	0	0.00430802	8.87759e-06	3.82866e-06	0	0.00430802	6.11531e-05	1	2.94358e-05	0	5.87082e-104	0	0.0124361	3.35578e-05	1	1.33936e-05	0	7.0849e-30	1	0
419	0		0	1	[h] : tmrs2eACP + nadph + h --> myrsACP + nadp	Forward only	Fatty acid biosynthesis	1.3.1.10;2.3.1.-	EAR140y	enoyl-[acyl-carrier-protein] reductase (NADPH) (n-C14:0)	0	0.0023606	3.16641e-05	1.37473e-05	0	0.0023606	3.35047e-05	0	1.46953e-05	1.83006e-07	0.700564	0	0.0023606	3.03402e-05	0	1.34558e-05	0.493147	0.845826	0	0	0.00430802	5.54569e-05	2.56873e-05	0	0.00430802	1.11034e-05	-1	5.17824e-06	0	7.9591e-75	0	0.0124361	0.000186393	1	8.37978e-05	0	1.27519e-70	1	0
420	0		0	1	[h] : tpalm2eACP + nadh + h --> palmACP + nad	Forward only	Fatty acid biosynthesis	1.3.1.9;2.3.1.-	EAR160x	enoyl-[acyl-carrier-protein] reductase (NADH) (n-C16:0)	0	0.0023606	5.01334e-06	2.25571e-06	0	0.0023606	7.15351e-06	0	3.29477e-06	9.47078e-85	5.86449e-05	0	0.0023606	5.6699e-06	0	2.13356e-06	1.29711e-07	0.44	0	0	0.00430802	1.08674e-05	4.93155e-06	0	0.00430802	6.2974e-05	1	3.08372e-05	0	1.075e-100	0	0.0124361	3.6613e-05	1	1.44233e-05	0	1.81767e-32	1	0
421	0		0	1	[h] : tpalm2eACP + nadph + h --> palmACP + nadp	Forward only	Fatty acid biosynthesis	1.3.1.10;2.3.1.-	EAR160y	enoyl-[acyl-carrier-protein] reductase (NADPH) (n-C16:0)	0	0.0023606	3.17862e-05	1.36597e-05	0	0.0023606	3.25338e-05	0	1.41778e-05	0.000646205	1.20291	0	0.0023606	2.78768e-05	0	1.19071e-05	3.62985e-15	0.077431	0	0	0.00430802	5.34865e-05	2.4381e-05	0	0.00430802	9.26538e-06	-1	4.02972e-06	0	1.11622e-76	0	0.0124361	0.000183338	1	8.35049e-05	0	4.19563e-70	1	0
422	0		0	0	[h] : toctd2eACP + nadh + h --> ocdcaACP + nad	Forward only	Fatty acid biosynthesis	1.3.1.9;2.3.1.-;1.3.1.-	EAR180x	enoyl-[acyl-carrier-protein] reductase (NADH) (n-C18:0)	0	0.00399353	0.000285493	0.000286539	0	0.00399353	0.00024746	-1	0.000250605	6.18268e-122	9.40331e-78	0	0.00399353	0.000355984	1	0.000305728	8.89974e-206	2.52597e-114	1	0	0.00720057	0.000670623	0.000560756	0	0.00720057	0.000321695	-1	0.000299635	0	0	0	0.0065817	0.000453713	-1	0.00037352	0	4.05904e-235	1	0
423	0		1	0	[h] : t3c11vaceACP + nadh + h --> octeACP + nad	Forward only	Fatty acid biosynthesis	1.3.1.9;2.3.1.-;1.3.1.-	EAR181x	enoyl-[acyl-carrier-protein] reductase (NADH) ((11Z)-n-C18:1)	0	0.00158648	0.000409495	0.000388063	0	0.00158648	0.000427798	1	0.000415573	5.72881e-08	3.65866e-07	0	0.00158648	0.000433009	1	0.000420455	3.21772e-10	2.67324e-11	1	0	0.00286789	0.000754439	0.00073159	0	0.00286789	0.0014528	0	0.00153713	0	0	0	0.00229913	0.000758663	0	0.000752849	0.020477	0.800749	0	0
424	0		0	0	[h] : t3c11vaceACP + nadph + h --> octeACP + nadp	Forward only	Fatty acid biosynthesis	1.3.1.10;2.3.1.-	EAR181y	enoyl-[acyl-carrier-protein] reductase (NADPH) ((11Z)-n-C18:1)	0	0.00158648	0.000688627	0.000710183	0	0.00158648	0.000670582	-1	0.00068335	7.25004e-08	5.96028e-07	0	0.00158648	0.000665161	-1	0.000677775	2.81185e-10	3.20267e-11	1	0	0.00286789	0.00122237	0.00124489	0	0.00286789	0.000524256	-1	0.000439128	0	0	0	0.00229913	0.00106769	-1	0.00107381	2.49411e-90	2.14651e-136	1	0
425	0		1	0	[h] : but2eACP + nadh + h --> butACP + nad	Forward only	Fatty acid biosynthesis	1.3.1.9;2.3.1.-	EAR40x	enoyl-[acyl-carrier-protein] reductase (NADH) (n-C4:0)	0	0.0023606	5.29356e-06	2.25777e-06	0	0.0023606	7.65201e-06	1	3.66616e-06	2.71736e-140	3.09282e-05	0	0.0023606	3.5668e-06	-1	1.35075e-06	7.14718e-138	0.000641101	1	0	0.00430802	5.61624e-05	2.64436e-05	0	0.00430802	6.29659e-05	0	3.03773e-05	1.04733e-17	0.129367	0	0.0124361	3.2188e-05	0	1.24845e-05	0	4.21917e-15	0	0
426	1		0	0	[h] : but2eACP + nadph + h --> butACP + nadp	Forward only	Fatty acid biosynthesis	1.3.1.10	EAR40y	enoyl-[acyl-carrier-protein] reductase (NADPH) (n-C4:0)	0	0.0023606	3.15121e-05	1.34738e-05	0	0.0023606	3.20371e-05	0	1.39641e-05	0.000888384	1.30202	0	0.0023606	2.98944e-05	0	1.29354e-05	0.000155503	0.715074	0	0	0.00430802	8.13974e-06	2.91152e-06	0	0.00430802	9.27233e-06	0	4.31542e-06	1.504e-69	0.49919	0	0.0124361	0.000187762	0	8.5045e-05	0	4.87493e-141	0	0
427	0		0	1	[h] : thex2eACP + nadh + h --> hexACP + nad	Forward only	Fatty acid biosynthesis	1.3.1.9;2.3.1.-	EAR60x	enoyl-[acyl-carrier-protein] reductase (NADH) (n-C6:0)	0	0.0023606	5.84562e-06	2.55214e-06	0	0.0023606	6.1151e-06	0	2.88602e-06	3.52529e-12	1.06974	0	0.0023606	4.17781e-06	0	1.4698e-06	1.691e-149	0.00213889	0	0	0.00430802	1.16371e-05	5.11148e-06	0	0.00430802	6.33325e-05	1	3.0824e-05	0	6.13522e-99	0	0.0124361	3.17652e-05	1	1.20583e-05	0	2.57473e-21	1	0
428	0		0	1	[h] : thex2eACP + nadph + h --> hexACP + nadp	Forward only	Fatty acid biosynthesis	1.3.1.10;2.3.1.-	EAR60y	enoyl-[acyl-carrier-protein] reductase (NADPH) (n-C6:0)	0	0.0023606	3.09677e-05	1.30853e-05	0	0.0023606	3.35604e-05	0	1.48067e-05	2.60659e-15	0.407653	0	0.0023606	2.93005e-05	0	1.27545e-05	0.00369027	0.688033	0	0	0.00430802	5.2727e-05	2.40275e-05	0	0.00430802	8.90952e-06	-1	3.85971e-06	0	7.43289e-76	0	0.0124361	0.000188181	1	8.60124e-05	0	1.61328e-76	1	0
429	0		0	1	[h] : toct2eACP + nadh + h --> ocACP + nad	Forward only	Fatty acid biosynthesis	1.3.1.9;2.3.1.-	EAR80x	enoyl-[acyl-carrier-protein] reductase (NADH) (n-C8:0)	0	0.0023606	6.57742e-06	2.94066e-06	0	0.0023606	7.43685e-06	0	3.40216e-06	4.84481e-14	0.300152	0	0.0023606	4.40247e-06	0	1.53693e-06	4.80349e-206	0.000104175	0	0	0.00430802	1.00572e-05	4.64754e-06	0	0.00430802	6.35744e-05	1	3.08928e-05	0	1.00639e-105	0	0.0124361	3.14706e-05	1	1.19352e-05	0	3.99222e-24	1	0
430	0		0	1	[h] : toct2eACP + nadph + h --> ocACP + nadp	Forward only	Fatty acid biosynthesis	1.3.1.10;2.3.1.-	EAR80y	enoyl-[acyl-carrier-protein] reductase (NADPH) (n-C8:0)	0	0.0023606	3.02549e-05	1.28048e-05	0	0.0023606	3.22495e-05	0	1.40161e-05	3.54578e-11	0.639053	0	0.0023606	2.90865e-05	0	1.25058e-05	0.32476	0.917106	0	0	0.00430802	5.4294e-05	2.47862e-05	0	0.00430802	8.67382e-06	-1	4.09258e-06	0	4.38873e-82	0	0.0124361	0.000188474	1	8.61255e-05	0	1.12254e-73	1	0
431	0		0	0	[h] : dcaACP + h2o --> ACP + dca + h	Forward only	Fatty acid biosynthesis	3.1.2.14	FA100ACPHi	fatty-acyl-ACP hydrolase (n-C10:0)	0	0	0	0	0	0	0	0	0	1	NaN	0	0	0	0	0	1	NaN	0	0	0	0	0	0	0	0	0	0	1	NaN	0	0	0	0	0	1	NaN	0	0
432	0		0	0	[h] : ddcaACP + h2o --> ACP + ddca + h	Forward only	Fatty acid biosynthesis	3.1.2.14	FA120ACPHi	fatty-acyl-ACP hydrolase (n-C12:0)	0	0	0	0	0	0	0	0	0	1	NaN	0	0	0	0	0	1	NaN	0	0	0	0	0	0	0	0	0	0	1	NaN	0	0	0	0	0	1	NaN	0	0
433	0	0	0	0	[h] : myrsACP + h2o --> ACP + ttdca + h	Forward only	Fatty acid biosynthesis	3.1.2.14	FA140ACPHi	fatty-acyl-ACP hydrolase (n-C14:0)	0	3.32341	0.00170089	0.000577726	0	3.32341	0.00924884	1	0.00322583	0	2.21985e-20	0	0.237771	0.000268527	-1	6.85049e-05	0	2.44586e-05	1	0	3.99696	0.00503529	0.00141396	0	3.99696	0.0133912	1	0.005565	0	4.11625e-13	0	0.0478275	3.97945e-05	-1	1.06581e-05	0	6.79472e-15	1	0
434	1		0	0	[h] : palmACP + h2o --> ACP + hdca + h	Forward only	Fatty acid biosynthesis	3.1.2.14;2.3.1.-	FA160ACPHi	fatty-acyl-ACP hydrolase (n-C16:0)	0	3.32341	0.00250028	0.000647736	0	3.32341	0.00374401	0	0.00118543	1.05234e-159	0.067394	0	0.237771	0.00012538	0	3.13135e-05	0	7.80556e-11	0	0	3.99696	0.00171633	0.00053349	0	3.99696	0.00210525	0	0.000494751	1.15558e-07	0.950593	0	0.0478275	7.68731e-05	0	3.14996e-05	0	1.08888e-07	0	0
435	0		0	0	[h] : hdeACP + h2o --> ACP + hdcea + h	Forward only	Fatty acid biosynthesis	3.1.2.14	FA161ACPHi	fatty-acyl-ACP hydrolase ((9Z)-n-C16:1)	0	3.32341	0.00217575	0.000697287	0	3.32341	0.00246059	0	0.000835835	1.20127e-33	1.00537	0	0.237771	0.000167542	0	3.17968e-05	0	5.3745e-12	0	0	3.99696	0.00263796	0.000637548	0	3.99696	0.00237921	0	0.000790854	1.43712e-47	1.15213	0	0.0478275	2.39959e-05	0	5.3379e-06	0	4.37001e-12	0	0
436	0		0	0	[h] : ocdcaACP + h2o --> ACP + ocdca + h	Forward only	Fatty acid biosynthesis	3.1.2.14;2.3.1.-	FA180ACPHi	fatty-acyl-ACP hydrolase (n-C18:0)	0	3.32344	0.00266931	0.00109152	0	3.32344	0.00260542	0	0.000943961	6.23508e-24	1.42992	0	0.238078	0.000316015	0	0.00023844	0	3.95892e-12	0	0	3.99702	0.00301456	0.00137023	0	3.99702	0.00291726	0	0.000995979	1.19703e-101	1.37968	0	0.0481341	0.000183396	0	0.000149149	0	2.14984e-19	0	0
437	1		0	0	[h] : octe9ACP + h2o --> ACP + ocdce9a + h	Forward only	Fatty acid biosynthesis	3.1.2.14	FA1819ZACPH	oleoyl-[acyl-carrier-protein] hydrolase ((9Z)-n-C18:1)	0	3.32341	0.00370798	0.000680013	0	3.32341	0.00310451	0	0.00075493	1.7227e-08	0.75562	0	0.237771	0.000127619	0	3.80098e-05	0	6.79786e-12	0	0	3.99696	0.0022678	0.000654189	0	3.99696	0.00218088	0	0.000767517	3.45558e-16	1.38747	0	0.0478275	4.5327e-05	0	1.40087e-05	0	1.49306e-07	0	0
438	0		0	0	[h] : octeACP + h2o --> ACP + ocdcea + h	Forward only	Fatty acid biosynthesis	3.1.2.14	FA181ACPHi	oleoyl-[acyl-carrier-protein] hydrolase ((11Z)-n-C18:1)	0.00102231	3.32443	0.00537995	0.00224339	0.00102231	3.32443	0.00366674	-1	0.0018029	9.69339e-76	0.0202499	0.00102231	0.238794	0.00120259	-1	0.00105996	0	1.04663e-16	1	0.00184016	3.9988	0.00434061	0.0027551	0.00184016	3.9988	0.00474662	0	0.00265443	8.04042e-60	0.955222	0.00170089	0.0495284	0.00172541	0	0.00170693	0	1.51927e-12	0	0.00337925
439	0		0	0	[h] : ocACP + h2o --> ACP + octa + h	Forward only	Fatty acid biosynthesis	3.1.2.14	FA80ACPHi	fatty-acyl-ACP hydrolase (n-C8:0)	0	0	0	0	0	0	0	0	0	1	NaN	0	0	0	0	0	1	NaN	0	0	0	0	0	0	0	0	0	0	1	NaN	0	0	0	0	0	1	NaN	0	0
440	1		0	0	[h] : acACP + malACP --> actACP + co2 + ACP	Forward only	Fatty acid biosynthesis	2.3.1.180;2.3.1.41;2.3.1.-	KAS14	beta-ketoacyl-ACP synthase	0	0.0023606	3.68984e-05	1.70204e-05	0	0.0023606	3.9741e-05	0	1.92284e-05	4.28089e-15	0.35554	0	0.0023606	3.36849e-05	0	1.52964e-05	1.86879e-15	0.205574	0	0	0.00430802	6.43855e-05	3.17482e-05	0	0.00430802	7.2286e-05	0	3.73584e-05	4.95775e-25	0.0698852	0	0.0124361	0.000219956	0	0.000105761	0	8.1498e-92	0	0
441	0		0	0	[m] : atp + btnCCP + hco3 --> adp + pi + cbtnCCP + h	Forward only	Fatty acid biosynthesis	6.3.4.14	BTNCm	biotin carboxylase	1.14369e-07	1.14369e-07	0	0	1.14369e-07	1.14369e-07	0	0	0	1	NaN	1.14369e-07	1.14369e-07	0	0	0	1	NaN	0	2.05865e-07	2.05865e-07	0	0	2.05865e-07	2.05865e-07	0	0	0	1	NaN	1.90284e-07	1.90284e-07	0	0	0	1	NaN	0	3.78047e-07
442	0		0	0	[m] : 3hhcoa <==> hx2coa + h2o	Reversible	Fatty acid elongation in mitochondria	4.2.1.17	ECOAH2m	enoyl-CoA hydratase (C6:0)	0.00462078	0.0400298	0.00850693	0.00779215	0.00462078	0.0400298	0.00862444	1	0.00793371	3.04051e-17	0.0372102	0.00462078	0.0400298	0.00770958	-1	0.00730291	0	1.85291e-89	1	0.00825848	0.0728788	0.0152191	0.0140411	0.00825848	0.0728788	0.01863	1	0.0150314	4.54921e-267	8.63587e-169	-1.80991e-26	0.0211809	0.0115566	-1	0.0115886	0	0	1	0.0151981
443	0		0	0	[m] : 3hocoa <==> oc2coa + h2o	Reversible	Fatty acid elongation in mitochondria	4.2.1.17	ECOAH3m	enoyl-CoA hydratase (C8:0)	0.00462078	0.0400298	0.00850693	0.00779215	0.00462078	0.0400298	0.00862444	1	0.00793371	3.04051e-17	0.0372102	0.00462078	0.0400298	0.00770958	-1	0.00730291	0	1.85291e-89	1	0.00825848	0.0728788	0.0152191	0.0140411	0.00825848	0.0728788	0.01863	1	0.0150314	4.54921e-267	8.63587e-169	-1.80991e-26	0.0211809	0.0115566	-1	0.0115886	0	0	1	0.0151981
444	0		0	0	[m] : 3hdcoa <==> dc2coa + h2o	Reversible	Fatty acid elongation in mitochondria	4.2.1.17	ECOAH4m	enoyl-CoA hydratase (C10:0)	0.00462078	0.0400298	0.00850693	0.00779215	0.00462078	0.0400298	0.00862444	1	0.00793371	3.04051e-17	0.0372102	0.00462078	0.0400298	0.00770958	-1	0.00730291	0	1.85291e-89	1	0.00825848	0.0728788	0.0152191	0.0140411	0.00825848	0.0728788	0.01863	1	0.0150314	4.54921e-267	8.63587e-169	-1.80991e-26	0.0211809	0.0115566	-1	0.0115886	0	0	1	0.0151981
445	0		0	0	[m] : 3hddcoa <==> dd2coa + h2o	Reversible	Fatty acid elongation in mitochondria	4.2.1.17	ECOAH5m	enoyl-CoA hydratase (C12:0)	0.00462078	0.0400298	0.00850693	0.00779215	0.00462078	0.0400298	0.00862444	1	0.00793371	3.04051e-17	0.0372102	0.00462078	0.0400298	0.00770958	-1	0.00730291	0	1.85291e-89	1	0.00825848	0.0728788	0.0152191	0.0140411	0.00825848	0.0728788	0.01863	1	0.0150314	4.54921e-267	8.63587e-169	-1.80991e-26	0.0211809	0.0115566	-1	0.0115886	0	0	1	0.0151981
446	0		0	0	[m] : 3htdcoa <==> td2coa + h2o	Reversible	Fatty acid elongation in mitochondria	4.2.1.17	ECOAH6m	enoyl-CoA hydratase (C14:0)	0.00462078	0.0400298	0.00850693	0.00779215	0.00462078	0.0400298	0.00862444	1	0.00793371	3.04051e-17	0.0372102	0.00462078	0.0400298	0.00770958	-1	0.00730291	0	1.85291e-89	1	0.00825848	0.0728788	0.0152191	0.0140411	0.00825848	0.0728788	0.01863	1	0.0150314	4.54921e-267	8.63587e-169	-1.80874e-26	0.0211809	0.0115566	-1	0.0115886	0	0	1	0.0151981
447	0		0	0	[m] : 3hhdcoa <==> hdd2coa + h2o	Reversible	Fatty acid elongation in mitochondria	4.2.1.17	ECOAH7m	enoyl-CoA hydratase (C16:0)	0.00462078	0.0400298	0.00850693	0.00779215	0.00462078	0.0400298	0.00862444	1	0.00793371	3.04051e-17	0.0372102	0.00462078	0.0400298	0.00770958	-1	0.00730291	0	1.85291e-89	1	0.00825848	0.0728788	0.0152191	0.0140411	0.00825848	0.0728788	0.01863	1	0.0150314	4.54921e-267	8.63587e-169	-1.8071e-26	0.0211809	0.0115566	-1	0.0115886	0	0	1	0.0151981
448	0		0	0	[m] : 3ohcoa + nadh + h <==> 3hhcoa + nad	Reversible	Fatty acid elongation in mitochondria	1.1.1.35	HACD2m	3-hydroxyacyl-CoA dehydrogenase (C6:0)	0.00462078	0.0400298	0.00850693	0.00779215	0.00462078	0.0400298	0.00862444	1	0.00793371	3.04051e-17	0.0372102	0.00462078	0.0400298	0.00770958	-1	0.00730291	0	1.85291e-89	1	0.00825848	0.0728788	0.0152191	0.0140411	0.00825848	0.0728788	0.01863	1	0.0150314	4.54921e-267	8.63587e-169	-1.80936e-26	0.0211809	0.0115566	-1	0.0115886	0	0	1	0.0151981
449	0		0	0	[m] : 3oocoa + nadh + h <==> 3hocoa + nad	Reversible	Fatty acid elongation in mitochondria	1.1.1.35	HACD3m	3-hydroxyacyl-CoA dehydrogenase (C8:0)	0.00462078	0.0400298	0.00850693	0.00779215	0.00462078	0.0400298	0.00862444	1	0.00793371	3.04051e-17	0.0372102	0.00462078	0.0400298	0.00770958	-1	0.00730291	0	1.85291e-89	1	0.00825848	0.0728788	0.0152191	0.0140411	0.00825848	0.0728788	0.01863	1	0.0150314	4.54921e-267	8.63587e-169	-1.80858e-26	0.0211809	0.0115566	-1	0.0115886	0	0	1	0.0151981
450	0		0	0	[m] : 3odcoa + nadh + h <==> 3hdcoa + nad	Reversible	Fatty acid elongation in mitochondria	1.1.1.35	HACD4m	3-hydroxyacyl-CoA dehydrogenase (C10:0)	0.00462078	0.0400298	0.00850693	0.00779215	0.00462078	0.0400298	0.00862444	1	0.00793371	3.04051e-17	0.0372102	0.00462078	0.0400298	0.00770958	-1	0.00730291	0	1.85291e-89	1	0.00825848	0.0728788	0.0152191	0.0140411	0.00825848	0.0728788	0.01863	1	0.0150314	4.54921e-267	8.63587e-169	-1.80936e-26	0.0211809	0.0115566	-1	0.0115886	0	0	1	0.0151981
451	0		0	0	[m] : 3oddcoa + nadh + h <==> 3hddcoa + nad	Reversible	Fatty acid elongation in mitochondria	1.1.1.35	HACD5m	3-hydroxyacyl-CoA dehydrogenase (C12:0)	0.00462078	0.0400298	0.00850693	0.00779215	0.00462078	0.0400298	0.00862444	1	0.00793371	3.04051e-17	0.0372102	0.00462078	0.0400298	0.00770958	-1	0.00730291	0	1.85291e-89	1	0.00825848	0.0728788	0.0152191	0.0140411	0.00825848	0.0728788	0.01863	1	0.0150314	4.54921e-267	8.63587e-169	-1.80858e-26	0.0211809	0.0115566	-1	0.0115886	0	0	1	0.0151981
452	0		0	0	[m] : 3otdcoa + nadh + h <==> 3htdcoa + nad	Reversible	Fatty acid elongation in mitochondria	1.1.1.35	HACD6m	3-hydroxyacyl-CoA dehydrogenase (C14:0)	0.00462078	0.0400298	0.00850693	0.00779215	0.00462078	0.0400298	0.00862444	1	0.00793371	3.04051e-17	0.0372102	0.00462078	0.0400298	0.00770958	-1	0.00730291	0	1.85291e-89	1	0.00825848	0.0728788	0.0152191	0.0140411	0.00825848	0.0728788	0.01863	1	0.0150314	4.54921e-267	8.63587e-169	-1.80858e-26	0.0211809	0.0115566	-1	0.0115886	0	0	1	0.0151981
453	0		0	0	[m] : 3ohdcoa + nadh + h <==> 3hhdcoa + nad	Reversible	Fatty acid elongation in mitochondria	1.1.1.35	HACD7m	3-hydroxyacyl-CoA dehydrogenase (C16:0)	0.00462078	0.0400298	0.00850693	0.00779215	0.00462078	0.0400298	0.00862444	1	0.00793371	3.04051e-17	0.0372102	0.00462078	0.0400298	0.00770958	-1	0.00730291	0	1.85291e-89	1	0.00825848	0.0728788	0.0152191	0.0140411	0.00825848	0.0728788	0.01863	1	0.0150314	4.54921e-267	8.63587e-169	-1.8078e-26	0.0211809	0.0115566	-1	0.0115886	0	0	1	0.0151981
454	0		0	0	[m] : accoa + btcoa --> coa + 3ohcoa	Forward only	Fatty acid elongation in mitochondria	2.3.1.16	ACACT2m	acetyl-CoA C-acyltransferase (C6:0)	0.00462078	0.0400298	0.00850693	0.00779215	0.00462078	0.0400298	0.00862444	1	0.00793371	3.04051e-17	0.0372102	0.00462078	0.0400298	0.00770958	-1	0.00730291	0	1.85291e-89	1	0.00825848	0.0728788	0.0152191	0.0140411	0.00825848	0.0728788	0.01863	1	0.0150314	4.54921e-267	8.63587e-169	0	0.0211809	0.0115566	-1	0.0115886	0	0	1	0.0151981
455	0		0	0	[m] : hxcoa + accoa --> coa + 3oocoa	Forward only	Fatty acid elongation in mitochondria	2.3.1.16	ACACT3m	acetyl-CoA C-acyltransferase (C8:0)	0.00462078	0.0400298	0.00850693	0.00779215	0.00462078	0.0400298	0.00862444	1	0.00793371	3.04051e-17	0.0372102	0.00462078	0.0400298	0.00770958	-1	0.00730291	0	1.85291e-89	1	0.00825848	0.0728788	0.0152191	0.0140411	0.00825848	0.0728788	0.01863	1	0.0150314	4.54921e-267	8.63587e-169	0	0.0211809	0.0115566	-1	0.0115886	0	0	1	0.0151981
456	0		0	0	[m] : occoa + accoa --> coa + 3odcoa	Forward only	Fatty acid elongation in mitochondria	2.3.1.16	ACACT4m	acetyl-CoA C-acyltransferase (C10:0)	0.00462078	0.0400298	0.00850693	0.00779215	0.00462078	0.0400298	0.00862444	1	0.00793371	3.04051e-17	0.0372102	0.00462078	0.0400298	0.00770958	-1	0.00730291	0	1.85291e-89	1	0.00825848	0.0728788	0.0152191	0.0140411	0.00825848	0.0728788	0.01863	1	0.0150314	4.54921e-267	8.63587e-169	0	0.0211809	0.0115566	-1	0.0115886	0	0	1	0.0151981
457	0		0	0	[m] : dcacoa + accoa --> coa + 3oddcoa	Forward only	Fatty acid elongation in mitochondria	2.3.1.16	ACACT5m	acetyl-CoA C-acyltransferase (C12:0)	0.00462078	0.0400298	0.00850693	0.00779215	0.00462078	0.0400298	0.00862444	1	0.00793371	3.04051e-17	0.0372102	0.00462078	0.0400298	0.00770958	-1	0.00730291	0	1.85291e-89	1	0.00825848	0.0728788	0.0152191	0.0140411	0.00825848	0.0728788	0.01863	1	0.0150314	4.54921e-267	8.63587e-169	0	0.0211809	0.0115566	-1	0.0115886	0	0	1	0.0151981
458	0		0	0	[m] : ddcacoa + accoa --> coa + 3otdcoa	Forward only	Fatty acid elongation in mitochondria	2.3.1.16	ACACT6m	acetyl-CoA C-acyltransferase (C14:0)	0.00462078	0.0400298	0.00850693	0.00779215	0.00462078	0.0400298	0.00862444	1	0.00793371	3.04051e-17	0.0372102	0.00462078	0.0400298	0.00770958	-1	0.00730291	0	1.85291e-89	1	0.00825848	0.0728788	0.0152191	0.0140411	0.00825848	0.0728788	0.01863	1	0.0150314	4.54921e-267	8.63587e-169	0	0.0211809	0.0115566	-1	0.0115886	0	0	1	0.0151981
459	0		0	0	[m] : tdcoa + accoa --> coa + 3ohdcoa	Forward only	Fatty acid elongation in mitochondria	2.3.1.16	ACACT7m	acetyl-CoA C-acyltransferase (C16:0)	0.00462078	0.0400298	0.00850693	0.00779215	0.00462078	0.0400298	0.00862444	1	0.00793371	3.04051e-17	0.0372102	0.00462078	0.0400298	0.00770958	-1	0.00730291	0	1.85291e-89	1	0.00825848	0.0728788	0.0152191	0.0140411	0.00825848	0.0728788	0.01863	1	0.0150314	4.54921e-267	8.63587e-169	0	0.0211809	0.0115566	-1	0.0115886	0	0	1	0.0151981
460	0		0	0	[m] : hx2coa + nadph + h --> hxcoa + nadp	Forward only	Fatty acid elongation in mitochondria	1.3.1.38	ACOAR2m	trans-2-enoyl-CoA reductase (NADPH) (C6:0)	0.00462078	0.0400298	0.00850693	0.00779215	0.00462078	0.0400298	0.00862444	1	0.00793371	3.04051e-17	0.0372102	0.00462078	0.0400298	0.00770958	-1	0.00730291	0	1.85291e-89	1	0.00825848	0.0728788	0.0152191	0.0140411	0.00825848	0.0728788	0.01863	1	0.0150314	4.54921e-267	8.63587e-169	0	0.0211809	0.0115566	-1	0.0115886	0	0	1	0.0151981
461	0		0	0	[m] : oc2coa + nadph + h --> occoa + nadp	Forward only	Fatty acid elongation in mitochondria	1.3.1.38	ACOAR3m	trans-2-enoyl-CoA reductase (NADPH) (C8:0)	0.00462078	0.0400298	0.00850693	0.00779215	0.00462078	0.0400298	0.00862444	1	0.00793371	3.04051e-17	0.0372102	0.00462078	0.0400298	0.00770958	-1	0.00730291	0	1.85291e-89	1	0.00825848	0.0728788	0.0152191	0.0140411	0.00825848	0.0728788	0.01863	1	0.0150314	4.54921e-267	8.63587e-169	0	0.0211809	0.0115566	-1	0.0115886	0	0	1	0.0151981
462	0		0	0	[m] : dc2coa + nadph + h --> dcacoa + nadp	Forward only	Fatty acid elongation in mitochondria	1.3.1.38	ACOAR4m	trans-2-enoyl-CoA reductase (NADPH) (C10:0)	0.00462078	0.0400298	0.00850693	0.00779215	0.00462078	0.0400298	0.00862444	1	0.00793371	3.04051e-17	0.0372102	0.00462078	0.0400298	0.00770958	-1	0.00730291	0	1.85291e-89	1	0.00825848	0.0728788	0.0152191	0.0140411	0.00825848	0.0728788	0.01863	1	0.0150314	4.54921e-267	8.63587e-169	0	0.0211809	0.0115566	-1	0.0115886	0	0	1	0.0151981
463	0		0	0	[m] : dd2coa + nadph + h --> ddcacoa + nadp	Forward only	Fatty acid elongation in mitochondria	1.3.1.38	ACOAR5m	trans-2-enoyl-CoA reductase (NADPH) (C12:0)	0.00462078	0.0400298	0.00850693	0.00779215	0.00462078	0.0400298	0.00862444	1	0.00793371	3.04051e-17	0.0372102	0.00462078	0.0400298	0.00770958	-1	0.00730291	0	1.85291e-89	1	0.00825848	0.0728788	0.0152191	0.0140411	0.00825848	0.0728788	0.01863	1	0.0150314	4.54921e-267	8.63587e-169	0	0.0211809	0.0115566	-1	0.0115886	0	0	1	0.0151981
464	0		0	0	[m] : td2coa + nadph + h --> tdcoa + nadp	Forward only	Fatty acid elongation in mitochondria	1.3.1.38	ACOAR6m	trans-2-enoyl-CoA reductase (NADPH) (C14:0)	0.00462078	0.0400298	0.00850693	0.00779215	0.00462078	0.0400298	0.00862444	1	0.00793371	3.04051e-17	0.0372102	0.00462078	0.0400298	0.00770958	-1	0.00730291	0	1.85291e-89	1	0.00825848	0.0728788	0.0152191	0.0140411	0.00825848	0.0728788	0.01863	1	0.0150314	4.54921e-267	8.63587e-169	0	0.0211809	0.0115566	-1	0.0115886	0	0	1	0.0151981
465	0		0	0	[m] : hdd2coa + nadph + h --> pmtcoa + nadp	Forward only	Fatty acid elongation in mitochondria	1.3.1.38	ACOAR7m	trans-2-enoyl-CoA reductase (NADPH) (C16:0)	0.00462078	0.0400298	0.00850693	0.00779215	0.00462078	0.0400298	0.00862444	1	0.00793371	3.04051e-17	0.0372102	0.00462078	0.0400298	0.00770958	-1	0.00730291	0	1.85291e-89	1	0.00825848	0.0728788	0.0152191	0.0140411	0.00825848	0.0728788	0.01863	1	0.0150314	4.54921e-267	8.63587e-169	0	0.0211809	0.0115566	-1	0.0115886	0	0	1	0.0151981
466	0		0	1	[x] : coa + aacoa <==> (2) accoa	Reversible	Fatty acid metabolism	2.3.1.9	ACACT1	Acetyl-CoA:acetyl-CoA C-acetyltransferase	0	0.0330484	0.00144178	0.000744726	0	0.0330484	0.00154858	0	0.000864989	3.04051e-17	0.0640536	0	0.0330484	0.000722858	0	0.000316902	0	1.98174e-74	0	4.02151e-27	0.0603123	0.00247174	0.00132299	1.07131e-23	0.0603123	0.00587289	1	0.00197904	3.29667e-269	7.68055e-169	0	0.00896765	5.68942e-05	-1	2.35411e-05	0	0	1	0
467	0		0	0	[x] : coa + 3ohcoa <==> accoa + btcoa	Reversible	Fatty acid metabolism	2.3.1.9;2.3.1.16	ACACT2	butanoyl-CoA:acetyl-CoA C-butanoyltransferase	0	0.0330484	0.00155634	0.000838265	0	0.0330484	0.00167619	1	0.000980749	7.3091e-17	0.0335365	0	0.0330484	0.000755734	-1	0.00034112	0	1.28863e-90	1	2.17739e-27	0.0603123	0.00270582	0.00151447	-2.51405e-24	0.0603123	0.00612332	1	0.00249839	2.25302e-267	6.01176e-170	0	0.00956549	0.000154353	-1	7.14225e-05	0	0	1	0
468	0		0	0	[x] : coa + 3oocoa <==> hxcoa + accoa	Reversible	Fatty acid metabolism	2.3.1.16	ACACT3	Hexanoyl-CoA:acetyl-CoA C-acyltransferase	0	0.0330484	0.00155634	0.000838265	0	0.0330484	0.00167619	1	0.000980749	7.3091e-17	0.0335365	0	0.0330484	0.000755734	-1	0.00034112	0	1.28863e-90	1	2.24381e-27	0.0603123	0.00270582	0.00151447	-2.51101e-24	0.0603123	0.00612332	1	0.00249839	2.25302e-267	6.01176e-170	0	0.00956549	0.000154353	-1	7.14225e-05	0	0	1	0
469	0		0	0	[x] : coa + 3odcoa <==> occoa + accoa	Reversible	Fatty acid metabolism	2.3.1.16	ACACT4	Octanoyl-CoA:acetyl-CoA C-acyltransferase	0	0.0330484	0.00155634	0.000838265	0	0.0330484	0.00167619	1	0.000980749	7.3091e-17	0.0335365	0	0.0330484	0.000755734	-1	0.00034112	0	1.28863e-90	1	2.30791e-27	0.0603123	0.00270582	0.00151447	-2.5028e-24	0.0603123	0.00612332	1	0.00249839	2.25302e-267	6.01176e-170	0	0.00956549	0.000154353	-1	7.14225e-05	0	0	1	0
470	0		0	0	[x] : coa + 3oddcoa <==> dcacoa + accoa	Reversible	Fatty acid metabolism	2.3.1.16	ACACT5	Decanoyl-CoA:acetyl-CoA C-acyltransferase	0	0.0330484	0.00155634	0.000838265	0	0.0330484	0.00167619	1	0.000980749	7.3091e-17	0.0335365	0	0.0330484	0.000755734	-1	0.00034112	0	1.28863e-90	1	2.33997e-27	0.0603123	0.00270582	0.00151447	-2.4946e-24	0.0603123	0.00612332	1	0.00249839	2.25302e-267	6.01176e-170	0	0.00956549	0.000154353	-1	7.14225e-05	0	0	1	0
471	0		0	0	[x] : coa + 3otdcoa <==> ddcacoa + accoa	Reversible	Fatty acid metabolism	2.3.1.16	ACACT6	Lauroyl-CoA:acetyl-CoA C-acyltransferase	0	0.0330484	0.00155634	0.000838265	0	0.0330484	0.00167619	1	0.000980749	7.3091e-17	0.0335365	0	0.0330484	0.000755734	-1	0.00034112	0	1.28863e-90	1	2.43613e-27	0.0603123	0.00270582	0.00151447	-2.47819e-24	0.0603123	0.00612332	1	0.00249839	2.25302e-267	6.01176e-170	0	0.00956549	0.000154353	-1	7.14225e-05	0	0	1	0
472	0		0	0	[x] : coa + 3ohdcoa <==> tdcoa + accoa	Reversible	Fatty acid metabolism	2.3.1.16	ACACT7	myristoyl-CoA:acetylCoA C-myristoyltransferase	0	0.0330484	0.00155634	0.000838265	0	0.0330484	0.00167619	1	0.000980749	7.3091e-17	0.0335365	0	0.0330484	0.000755734	-1	0.00034112	0	1.28863e-90	1	2.43613e-27	0.0603123	0.00270582	0.00151447	-2.47819e-24	0.0603123	0.00612332	1	0.00249839	2.25302e-267	6.01176e-170	0	0.00956549	0.000154353	-1	7.14225e-05	0	0	1	0
473	0		0	0	[h] : cytP450o + nadph + h <==> cytP450r + nadp	Reversible	Fatty acid metabolism	1.6.2.4	CYTP450Rh	cytochrome P-450 reductase, chloroplast	0	0	0	0	0	0	0	0	0	1	NaN	0	0	0	0	0	1	NaN	0	0	0	0	0	0	0	0	0	0	1	NaN	0	0	0	0	0	1	NaN	0	0
474	0		0	1	[x] : b2coa + h2o <==> 3hbcoa	Reversible	Fatty acid metabolism	4.2.1.17	ECOAH1	(S)-3-Hydroxybutanoyl-CoA hydro-lyase	0	0.0330484	0.00144178	0.000744726	0	0.0330484	0.00154858	0	0.000864989	3.04051e-17	0.0640536	0	0.0330484	0.000722858	0	0.000316902	0	1.98174e-74	0	4.03315e-27	0.0603123	0.00247174	0.00132299	1.07098e-23	0.0603123	0.00587289	1	0.00197904	3.29667e-269	7.68055e-169	0	0.00896765	5.68942e-05	-1	2.35411e-05	0	0	1	0
475	0		0	0	[x] : hx2coa + h2o <==> 3hhcoa	Reversible	Fatty acid metabolism	4.2.1.17	ECOAH2	(S)-Hydroxyhexanoyl-CoA hydro-lyase	0	0.0330484	0.00155634	0.000838265	0	0.0330484	0.00167619	1	0.000980749	7.3091e-17	0.0335365	0	0.0330484	0.000755734	-1	0.00034112	0	1.28863e-90	1	2.19532e-27	0.0603123	0.00270582	0.00151447	-2.50922e-24	0.0603123	0.00612332	1	0.00249839	2.25302e-267	6.01176e-170	0	0.00956549	0.000154353	-1	7.14225e-05	0	0	1	0
476	0		0	0	[x] : oc2coa + h2o <==> 3hocoa	Reversible	Fatty acid metabolism	4.2.1.17	ECOAH3	(S)-Hydroxyoctanoyl-CoA hydro-lyase	0	0.0330484	0.00155634	0.000838265	0	0.0330484	0.00167619	1	0.000980749	7.3091e-17	0.0335365	0	0.0330484	0.000755734	-1	0.00034112	0	1.28863e-90	1	2.28808e-27	0.0603123	0.00270582	0.00151447	-2.50131e-24	0.0603123	0.00612332	1	0.00249839	2.25302e-267	6.01176e-170	0	0.00956549	0.000154353	-1	7.14225e-05	0	0	1	0
477	0		0	0	[x] : dc2coa + h2o <==> 3hdcoa	Reversible	Fatty acid metabolism	4.2.1.17	ECOAH4	(S)-Hydroxydecanoyl-CoA hydro-lyase	0	0.0330484	0.00155634	0.000838265	0	0.0330484	0.00167619	1	0.000980749	7.3091e-17	0.0335365	0	0.0330484	0.000755734	-1	0.00034112	0	1.28863e-90	1	2.34992e-27	0.0603123	0.00270582	0.00151447	-2.49339e-24	0.0603123	0.00612332	1	0.00249839	2.25302e-267	6.01176e-170	0	0.00956549	0.000154353	-1	7.14225e-05	0	0	1	0
478	0		0	0	[x] : dd2coa + h2o <==> 3hddcoa	Reversible	Fatty acid metabolism	4.2.1.17	ECOAH5	(S)-3-Hydroxydodecanoyl-CoA hydro-lyase	0	0.0330484	0.00155634	0.000838265	0	0.0330484	0.00167619	1	0.000980749	7.3091e-17	0.0335365	0	0.0330484	0.000755734	-1	0.00034112	0	1.28863e-90	1	2.38084e-27	0.0603123	0.00270582	0.00151447	-2.48548e-24	0.0603123	0.00612332	1	0.00249839	2.25302e-267	6.01176e-170	0	0.00956549	0.000154353	-1	7.14225e-05	0	0	1	0
479	0		0	0	[x] : td2coa + h2o <==> 3htdcoa	Reversible	Fatty acid metabolism	4.2.1.17	ECOAH6	(S)-3-Hydroxytetradecanoyl-CoA hydro-lyase	0	0.0330484	0.00155634	0.000838265	0	0.0330484	0.00167619	1	0.000980749	7.3091e-17	0.0335365	0	0.0330484	0.000755734	-1	0.00034112	0	1.28863e-90	1	2.44268e-27	0.0603123	0.00270582	0.00151447	-2.47756e-24	0.0603123	0.00612332	1	0.00249839	2.25302e-267	6.01176e-170	0	0.00956549	0.000154353	-1	7.14225e-05	0	0	1	0
480	0		0	0	[x] : hdd2coa + h2o <==> 3hhdcoa	Reversible	Fatty acid metabolism	4.2.1.17	ECOAH7	(S)-3-Hydroxyhexadecanoyl-CoA hydro-lyase	0	0.0330484	0.00155634	0.000838265	0	0.0330484	0.00167619	1	0.000980749	7.3091e-17	0.0335365	0	0.0330484	0.000755734	-1	0.00034112	0	1.28863e-90	1	2.44112e-27	0.0603123	0.00270582	0.00151447	-2.47253e-24	0.0603123	0.00612332	1	0.00249839	2.25302e-267	6.01176e-170	0	0.00956549	0.000154353	-1	7.14225e-05	0	0	1	0
481	0		0	1	[x] : 3hbcoa + nad <==> aacoa + nadh + h	Reversible	Fatty acid metabolism	1.1.1.35	HACD1	(S)-3-Hydroxybutanoyl-CoA:NAD oxidoreductase	0	0.0330484	0.00144178	0.000744726	0	0.0330484	0.00154858	0	0.000864989	3.04051e-17	0.0640536	0	0.0330484	0.000722858	0	0.000316902	0	1.98174e-74	0	4.02963e-27	0.0603123	0.00247174	0.00132299	1.0713e-23	0.0603123	0.00587289	1	0.00197904	3.29667e-269	7.68055e-169	0	0.00896765	5.68942e-05	-1	2.35411e-05	0	0	1	0
482	0		0	0	[x] : 3hhcoa + nad <==> 3ohcoa + nadh + h	Reversible	Fatty acid metabolism	1.1.1.35	HACD2	(S)-hydroxyhexanoyl-CoA:NAD oxidoreductase	0	0.0330484	0.00155634	0.000838265	0	0.0330484	0.00167619	1	0.000980749	7.3091e-17	0.0335365	0	0.0330484	0.000755734	-1	0.00034112	0	1.28863e-90	1	2.20478e-27	0.0603123	0.00270582	0.00151447	-2.51974e-24	0.0603123	0.00612332	1	0.00249839	2.25302e-267	6.01176e-170	0	0.00956549	0.000154353	-1	7.14225e-05	0	0	1	0
483	0		0	0	[x] : 3hocoa + nad <==> 3oocoa + nadh + h	Reversible	Fatty acid metabolism	1.1.1.35	HACD3	(S)-hydroxyoctanoyl-CoA:NAD oxidoreductase	0	0.0330484	0.00155634	0.000838265	0	0.0330484	0.00167619	1	0.000980749	7.3091e-17	0.0335365	0	0.0330484	0.000755734	-1	0.00034112	0	1.28863e-90	1	2.28352e-27	0.0603123	0.00270582	0.00151447	-2.50966e-24	0.0603123	0.00612332	1	0.00249839	2.25302e-267	6.01176e-170	0	0.00956549	0.000154353	-1	7.14225e-05	0	0	1	0
484	0		0	0	[x] : 3hdcoa + nad <==> 3odcoa + nadh + h	Reversible	Fatty acid metabolism	1.1.1.35	HACD4	(S)-hydroxydecanoyl-CoA:NAD oxidoreductase	0	0.0330484	0.00155634	0.000838265	0	0.0330484	0.00167619	1	0.000980749	7.3091e-17	0.0335365	0	0.0330484	0.000755734	-1	0.00034112	0	1.28863e-90	1	2.36226e-27	0.0603123	0.00270582	0.00151447	-2.49959e-24	0.0603123	0.00612332	1	0.00249839	2.25302e-267	6.01176e-170	0	0.00956549	0.000154353	-1	7.14225e-05	0	0	1	0
485	0		0	0	[x] : 3hddcoa + nad <==> 3oddcoa + nadh + h	Reversible	Fatty acid metabolism	1.1.1.35	HACD5	(S)-3-hydroxydodecanoyl-CoA:NAD oxidoreductase	0	0.0330484	0.00155634	0.000838265	0	0.0330484	0.00167619	1	0.000980749	7.3091e-17	0.0335365	0	0.0330484	0.000755734	-1	0.00034112	0	1.28863e-90	1	2.40163e-27	0.0603123	0.00270582	0.00151447	-2.48951e-24	0.0603123	0.00612332	1	0.00249839	2.25302e-267	6.01176e-170	0	0.00956549	0.000154353	-1	7.14225e-05	0	0	1	0
486	0		0	0	[x] : 3htdcoa + nad <==> 3otdcoa + nadh + h	Reversible	Fatty acid metabolism	1.1.1.35	HACD6	(S)-3-Hydroxytetradecanoyl-CoA:NAD oxidoreductase	0	0.0330484	0.00155634	0.000838265	0	0.0330484	0.00167619	1	0.000980749	7.3091e-17	0.0335365	0	0.0330484	0.000755734	-1	0.00034112	0	1.28863e-90	1	2.441e-27	0.0603123	0.00270582	0.00151447	-2.47943e-24	0.0603123	0.00612332	1	0.00249839	2.25302e-267	6.01176e-170	0	0.00956549	0.000154353	-1	7.14225e-05	0	0	1	0
487	0		0	0	[x] : 3hhdcoa + nad <==> 3ohdcoa + nadh + h	Reversible	Fatty acid metabolism	1.1.1.35	HACD7	(S)-3-Hydroxyhexadecanoyl-CoA:NAD oxidoreductase	0	0.0330484	0.00155634	0.000838265	0	0.0330484	0.00167619	1	0.000980749	7.3091e-17	0.0335365	0	0.0330484	0.000755734	-1	0.00034112	0	1.28863e-90	1	2.44834e-27	0.0603123	0.00270582	0.00151447	-2.47628e-24	0.0603123	0.00612332	1	0.00249839	2.25302e-267	6.01176e-170	0	0.00956549	0.000154353	-1	7.14225e-05	0	0	1	0
488	1		0	0	[h] : atp + ocdce9a + ACP --> amp + ppi + octe9ACP + h	Forward only	Fatty acid metabolism	6.2.1.20	AACP1819ZS	long-chain-fatty-acid-[acyl-carrier-protein] ligase (18:1(9Z))	0	3.32473	0.00500116	0.00196683	0	3.32473	0.00439524	0	0.00204861	8.15111e-08	0.75273	0	0.239099	0.00129214	0	0.00131687	0	1.09978e-12	0	0	3.99935	0.00442705	0.00288733	0	3.99935	0.00449848	0	0.0030917	1.40097e-55	1.40907	0	0.0500362	0.0019623	0	0.00203384	0	4.73974e-09	0	0
489	0	0	0	0	[h] : atp + ttdca + ACP --> amp + ppi + myrsACP + h	Forward only	Fatty acid metabolism	6.2.1.20	AACPS1	long-chain-fatty-acid-[acyl-carrier-protein] ligase (14:0)	0	3.32341	0.00170089	0.000577726	6.3542e-25	3.32341	0.00924884	1	0.00322583	0	2.21985e-20	0	0.237771	0.000268527	-1	6.85049e-05	0	2.44586e-05	1	0	3.99696	0.00503529	0.00141396	0	3.99696	0.0133912	1	0.005565	0	4.11625e-13	5.45866e-27	0.0478275	3.97945e-05	-1	1.06581e-05	0	6.79472e-15	1	0
490	1		0	0	[h] : atp + hdca + ACP --> amp + ppi + palmACP + h	Forward only	Fatty acid metabolism	6.2.1.20	AACPS3	long-chain-fatty-acid-[acyl-carrier-protein] ligase (16:0)	0.000231573	3.32603	0.0053423	0.00350188	0.000231573	3.32603	0.00654541	0	0.00400621	2.22209e-131	0.0800435	0.000231573	0.240671	0.00304115	0	0.00292611	0	3.11176e-10	0	0.000357899	4.00168	0.00699093	0.00585326	0.000357899	4.00168	0.00702326	0	0.00543499	1.20356e-193	1.45889	0	0.0529377	0.00462482	0	0.0045732	0	7.46499e-15	0	0.000689561
491	0		0	0	[h] : atp + hdcea + ACP --> amp + ppi + hdeACP + h	Forward only	Fatty acid metabolism	6.2.1.20	AACPS4	long-chain-fatty-acid-[acyl-carrier-protein] ligase (16:1(9Z))	0	3.32341	0.00217575	0.000697287	0	3.32341	0.00246059	0	0.000835835	1.20127e-33	1.00537	0	0.237771	0.000167542	0	3.17968e-05	0	5.3745e-12	0	0	3.99696	0.00263796	0.000637548	0	3.99696	0.00237921	0	0.000790854	1.43712e-47	1.15213	0	0.0478275	2.39959e-05	0	5.3379e-06	0	4.37001e-12	0	0
492	0		0	0	[h] : atp + ocdcea + ACP --> amp + ppi + octeACP + h	Forward only	Fatty acid metabolism	6.2.1.20	AACPS5	long-chain-fatty-acid-[acyl-carrier-protein] ligase (18:1(11Z))	0	3.32341	0.00435639	0.00122009	0	3.32341	0.00264292	-1	0.000778935	2.04366e-75	0.0202499	0	0.237771	0.000178977	-1	3.64378e-05	0	1.04663e-16	1	0	3.99696	0.002498	0.000911656	0	3.99696	0.00290377	0	0.000808355	8.04042e-60	0.955222	0	0.0478275	2.30872e-05	0	5.23222e-06	0	2.37739e-11	0	0
493	0		0	0	[h] : atp + ocdca + ACP --> amp + ppi + ocdcaACP + h	Forward only	Fatty acid metabolism	6.2.1.20	AACPS6	long-chain-fatty-acid-[acyl-carrier-protein] ligase (18:0)	0	3.32341	0.00241816	0.000838142	0	3.32341	0.00239475	0	0.000730012	1.94798e-12	1.48095	0	0.237771	0.000123027	0	2.57675e-05	0	1.3777e-11	0	0	3.99696	0.00257423	0.000918186	0	3.99696	0.00266749	0	0.000738364	6.13585e-25	1.38117	0	0.0478275	2.13792e-05	0	5.87342e-06	0	5.3257e-16	0	0
494	0		0	0	[x] : dcacoa + fad --> dc2coa + fadh2	Forward only	Fatty acid metabolism	1.3.99.-;1.3.3.6	ACOA100OR	Decanoyl-CoA:(acceptor) 2,3-oxidoreductase	0	0.0330484	0.00155634	0.000838265	0	0.0330484	0.00167619	1	0.000980749	7.3091e-17	0.0335365	0	0.0330484	0.000755734	-1	0.00034112	0	1.28863e-90	1	0	0.0603123	0.00270582	0.00151447	0	0.0603123	0.00612332	1	0.00249839	2.25302e-267	6.01176e-170	0	0.00956549	0.000154353	-1	7.14225e-05	0	0	1	0
495	0		0	0	[x] : ddcacoa + fad --> dd2coa + fadh2	Forward only	Fatty acid metabolism	1.3.99.-;1.3.3.6	ACOA120OR	Lauroyl-CoA:(acceptor) 2,3-oxidoreductase	0	0.0330484	0.00155634	0.000838265	0	0.0330484	0.00167619	1	0.000980749	7.3091e-17	0.0335365	0	0.0330484	0.000755734	-1	0.00034112	0	1.28863e-90	1	0	0.0603123	0.00270582	0.00151447	0	0.0603123	0.00612332	1	0.00249839	2.25302e-267	6.01176e-170	0	0.00956549	0.000154353	-1	7.14225e-05	0	0	1	0
496	0		0	0	[x] : tdcoa + fad --> td2coa + fadh2	Forward only	Fatty acid metabolism	1.3.99.-;1.3.3.6	ACOA140OR	Tetradecanoyl-CoA:(acceptor) 2,3-oxidoreductase	0	0.0330484	0.00155634	0.000838265	0	0.0330484	0.00167619	1	0.000980749	7.3091e-17	0.0335365	0	0.0330484	0.000755734	-1	0.00034112	0	1.28863e-90	1	0	0.0603123	0.00270582	0.00151447	0	0.0603123	0.00612332	1	0.00249839	2.25302e-267	6.01176e-170	0	0.00956549	0.000154353	-1	7.14225e-05	0	0	1	0
497	0		0	0	[x] : pmtcoa + fad --> hdd2coa + fadh2	Forward only	Fatty acid metabolism	1.3.99.-;1.3.3.6	ACOA160OR	Palmitoyl-CoA:oxygen 2-oxidoreductase	0	0.0330484	0.00155634	0.000838265	0	0.0330484	0.00167619	1	0.000980749	7.3091e-17	0.0335365	0	0.0330484	0.000755734	-1	0.00034112	0	1.28863e-90	1	0	0.0603123	0.00270582	0.00151447	0	0.0603123	0.00612332	1	0.00249839	2.25302e-267	6.01176e-170	0	0.00956549	0.000154353	-1	7.14225e-05	0	0	1	0
498	0		0	1	[x] : btcoa + fad --> fadh2 + b2coa	Forward only	Fatty acid metabolism	1.3.99.-;1.3.99.2;1.3.3.6	ACOA40OR	Butanoyl-CoA:oxygen 2-oxidoreductase	0	0.0330484	0.00144178	0.000744726	0	0.0330484	0.00154858	0	0.000864989	3.04051e-17	0.0640536	0	0.0330484	0.000722858	0	0.000316902	0	1.98174e-74	0	0	0.0603123	0.00247174	0.00132299	0	0.0603123	0.00587289	1	0.00197904	3.29667e-269	7.68055e-169	0	0.00896765	5.68942e-05	-1	2.35411e-05	0	0	1	0
499	0		0	0	[x] : hxcoa + fad --> hx2coa + fadh2	Forward only	Fatty acid metabolism	1.3.99.-;1.3.99.2;1.3.3.6	ACOA60OR	Hexanoyl-CoA:(acceptor) 2,3-oxidoreductase	0	0.0330484	0.00155634	0.000838265	0	0.0330484	0.00167619	1	0.000980749	7.3091e-17	0.0335365	0	0.0330484	0.000755734	-1	0.00034112	0	1.28863e-90	1	0	0.0603123	0.00270582	0.00151447	0	0.0603123	0.00612332	1	0.00249839	2.25302e-267	6.01176e-170	0	0.00956549	0.000154353	-1	7.14225e-05	0	0	1	0
500	0		0	0	[x] : occoa + fad --> oc2coa + fadh2	Forward only	Fatty acid metabolism	1.3.99.-;1.3.3.6	ACOA80OR	Octanoyl-CoA:oxygen 2-oxidoreductase	0	0.0330484	0.00155634	0.000838265	0	0.0330484	0.00167619	1	0.000980749	7.3091e-17	0.0335365	0	0.0330484	0.000755734	-1	0.00034112	0	1.28863e-90	1	0	0.0603123	0.00270582	0.00151447	0	0.0603123	0.00612332	1	0.00249839	2.25302e-267	6.01176e-170	0	0.00956549	0.000154353	-1	7.14225e-05	0	0	1	0
501	1		0	0	[c] : atp + ca + coa --> amp + cacoa + ppi + h	Forward only	Fatty acid metabolism	6.2.1.3	CACOAL	Coniferonic acid:CoA ligase (AMP-forming)	0.00025989	0.0167841	0.000338007	0.000292075	0.00025989	0.0167841	0.000337875	0	0.000293104	1.27507e-05	1.4933	0.00025989	0.0167841	0.000336733	0	0.000290803	0.00177586	1.36944	0	0.000467802	0.0306239	0.00060645	0.0005279	0.000467802	0.0306239	0.000619039	0	0.000538217	2.10465e-25	0.769667	0.000432396	0.0482599	0.00066392	0	0.000530471	1.92795e-55	0.00250008	0	0.000859065
502	1		0	0	[c] : atp + hdca + coa --> amp + pmtcoa + ppi	Forward only	Fatty acid metabolism	6.2.1.3	FACOAL160	Palmitate:CoA ligase (AMP-forming)	0	0.0165242	0.000106456	3.7633e-05	0	0.0165242	0.000114797	0	4.31196e-05	1.67782e-12	0.782965	0	0.0165242	0.00012087	0	4.00903e-05	0.0034362	0.314624	0	0	0.0301561	0.000223485	7.56159e-05	0	0.0301561	0.000206862	0	8.59034e-05	3.07658e-15	0.77532	0	0.0478275	0.00043932	0	0.000189855	0	7.7939e-20	0	0
503	0		0	0	[h] : ddca + cytP450r + o2 --> cytP450o + whddca + h2o	Forward only	Fatty acid metabolism	1.14.19.1	FAH120	fatty acid omega-hydroxylase (12:0)	0	0	0	0	0	0	0	0	0	1	NaN	0	0	0	0	0	1	NaN	0	0	0	0	0	0	0	0	0	0	1	NaN	0	0	0	0	0	1	NaN	0	0
504	0		0	0	[h] : ttdca + cytP450r + o2 --> cytP450o + whttdca + h2o	Forward only	Fatty acid metabolism	1.14.19.1	FAH140	fatty acid omega-hydroxylase (14:0)	0	0	0	0	0	0	0	0	0	1	NaN	0	0	0	0	0	1	NaN	0	0	0	0	0	0	0	0	0	0	1	NaN	0	0	0	0	0	1	NaN	0	0
505	0		0	0	[h] : hdca + cytP450r + o2 --> cytP450o + whhdca + h2o	Forward only	Fatty acid metabolism	1.14.19.1	FAH160	fatty acid omega-hydroxylase (16:0)	0	0	0	0	0	0	0	0	0	1	NaN	0	0	0	0	0	1	NaN	0	0	0	0	0	0	0	0	0	0	1	NaN	0	0	0	0	0	1	NaN	0	0
506	0		0	0	[h] : ocdce9a + cytP450r + o2 --> cytP450o + whodce9a + h2o	Forward only	Fatty acid metabolism	1.14.19.1	FAH1819Z	fatty acid omega-hydroxylase (18:1(9Z))	0	0	0	0	0	0	0	0	0	1	NaN	0	0	0	0	0	1	NaN	0	0	0	0	0	0	0	0	0	0	1	NaN	0	0	0	0	0	1	NaN	0	0
507	0		0	0	[h] : lnlc + cytP450r + o2 --> cytP450o + whlnlc + h2o	Forward only	Fatty acid metabolism	1.14.19.1	FAH1829Z12Z	fatty acid omega-hydroxylase (18:2(9Z,12Z))	0	0	0	0	0	0	0	0	0	1	NaN	0	0	0	0	0	1	NaN	0	0	0	0	0	0	0	0	0	0	1	NaN	0	0	0	0	0	1	NaN	0	0
508	1		0	0	[c] : atp + lnlc + coa --> amp + lnlccoa + ppi	Forward only	Fatty acid metabolism	6.2.1.3	LNLCCOAL	Linoleic acid:CoA ligase (AMP-forming)	0	0.0165242	3.25243e-05	1.08599e-05	0	0.0165242	3.08497e-05	0	1.13085e-05	1.33784e-06	1.21192	0	0.0165242	3.32801e-05	0	1.03242e-05	0.00297575	1.37213	0	0	0.0301561	6.21431e-05	2.12639e-05	0	0.0301561	5.66224e-05	0	2.08377e-05	0.00643594	0.989526	0	0.0478275	8.36623e-05	0	3.04752e-05	2.95109e-118	0.0713045	0	0
509	0		0	0	[c] : atp + lnlnca + coa --> amp + lnlncacoa + ppi	Forward only	Fatty acid metabolism	6.2.1.3	LNLNCACOAL	alpha-Linolenic acid:CoA ligase (AMP-forming)	0	0.0165242	4.84146e-06	1.6136e-06	0	0.0165242	4.82418e-06	0	1.78307e-06	5.98393e-20	1.49818	0	0.0165242	4.65157e-06	0	1.62047e-06	2.81185e-10	1.40331	0	0	0.0301561	1.22445e-05	2.93108e-06	0	0.0301561	1.11499e-05	0	3.48089e-06	5.98393e-20	1.25735	0	0.0478275	1.76288e-05	0	5.49045e-06	1.70014e-259	0.345615	0	0
510	0		0	0	[c] : atp + lnlncg + coa --> amp + lnlncgcoa + ppi	Forward only	Fatty acid metabolism	6.2.1.3	LNLNCGCOAL	gamma-Linolenic acid:CoA ligase (AMP-forming)	0	0.0165242	6.92621e-06	1.71498e-06	0	0.0165242	3.88387e-06	0	1.75794e-06	2.65209e-55	0.0928818	0	0.0165242	5.02404e-06	0	1.68063e-06	1.20196e-06	0.325373	0	0	0.0301561	1.27833e-05	3.56987e-06	0	0.0301561	1.1355e-05	0	3.7597e-06	1.27587e-19	1.16297	0	0.0478275	2.86754e-05	0	6.01204e-06	8.52251e-124	0.00486439	0	0
511	1		0	0	[c] : atp + pa + coa --> amp + pacoa + ppi	Forward only	Fatty acid metabolism	6.2.1.3	PACOAL	Pinolenic acid:CoA ligase (AMP-forming)	0.000259332	0.0167836	0.000345112	0.000294364	0.000259332	0.0167836	0.000335071	0	0.000295611	0.0192675	0.402683	0.000259332	0.0167836	0.000349474	0	0.000296265	0.00164696	1.00603	0	0.000466797	0.0306229	0.000612579	0.000532275	0.000466797	0.0306229	0.000639868	0	0.000550065	8.10831e-59	0.136597	0.000431467	0.0482589	0.000690434	0	0.000543965	2.09679e-34	2.98451e-05	0	0.000857219
512	0		0	0	[c] : dhnpt <==> gcald + 2ahhmp	Reversible	Folate biosynthesis	4.1.2.25	DHNPAr	2-Amino-4-hydroxy-6-(D-erythro-1,2,3-trihydroxypropyl)-7,8-dihydropteridine glycolaldehyde-lyase	0	0	0	0	0	0	0	0	0	1	NaN	0	0	0	0	0	1	NaN	0	0	0	0	0	0	0	0	0	0	1	NaN	0	0	0	0	0	1	NaN	0	0
513	0		0	0	[c] : atp + 10fthf + glu-L --> adp + pi + 10fthfglu-L	Forward only	Folate biosynthesis	6.3.2.12;6.3.2.17	10FTHFGLULL	10-Formyltetrahydrofolate:L-glutamate ligase (ADP-forming)	0	0	0	0	0	0	0	0	0	1	NaN	0	0	0	0	0	1	NaN	0	0	0	0	0	0	0	0	0	0	1	NaN	0	0	0	0	0	1	NaN	0	0
514	0		0	0	[m] : atp + 10fthf + glu-L --> adp + pi + 10fthfglu-L	Forward only	Folate biosynthesis	6.3.2.17	10FTHFGLULLm	10-Formyltetrahydrofolate:L-glutamate ligase (ADP-forming)	0	0	0	0	0	0	0	0	0	1	NaN	0	0	0	0	0	1	NaN	0	0	0	0	0	0	0	0	0	0	1	NaN	0	0	0	0	0	1	NaN	0	0
515	0		0	0	[c] : 4adcho --> 4abz + pyr + h	Forward only	Folate biosynthesis	4.1.3.38	ADCL	4-amino-4-deoxychorismate pyruvate-lyase	0	0	0	0	0	0	0	0	0	1	NaN	0	0	0	0	0	1	NaN	0	0	0	0	0	0	0	0	0	0	1	NaN	0	0	0	0	0	1	NaN	0	0
516	0		0	0	[c] : chor + gln-L --> 4adcho + glu-L	Forward only	Folate biosynthesis	2.6.1.85	ADCS	chorismate:L-glutamine aminotransferase	0	0	0	0	0	0	0	0	0	1	NaN	0	0	0	0	0	1	NaN	0	0	0	0	0	0	0	0	0	0	1	NaN	0	0	0	0	0	1	NaN	0	0
517	0		0	0	[c] : ahdt + (3) h2o --> dhnpt + (3) pi + h	Forward only	Folate biosynthesis	3.1.3.1	AKP1	2-Amino-4-hydroxy-6-(erythro-1,2,3-trihydroxypropyl) dihydropteridine triphosphate phosphohydrolase (alkaline optimum)	0	0	0	0	0	0	0	0	0	1	NaN	0	0	0	0	0	1	NaN	0	0	0	0	0	0	0	0	0	0	1	NaN	0	0	0	0	0	1	NaN	0	0
518	0		0	0	[c] : fol + nadh + h --> dhf + nad	Forward only	Folate biosynthesis	1.5.1.3	DHFOR	Dihydrofolate:NAD+ oxidoreductase	0	0	0	0	0	0	0	0	0	1	NaN	0	0	0	0	0	1	NaN	0	0	0	0	0	0	0	0	0	0	1	NaN	0	0	0	0	0	1	NaN	0	0
519	0		0	0	[c] : atp + dhpt + glu-L --> adp + pi + dhf + h	Forward only	Folate biosynthesis	6.3.2.12;6.3.2.17	DHFS	7,8-dihydropteroate:L-glutamate ligase (ADP-forming)	0	0	0	0	0	0	0	0	0	1	NaN	0	0	0	0	0	1	NaN	0	0	0	0	0	0	0	0	0	0	1	NaN	0	0	0	0	0	1	NaN	0	0
520	0		0	0	[c] : 2ahhmp + 4abz --> dhpt + h2o	Forward only	Folate biosynthesis	2.5.1.15	DHPS	2-Amino-4-hydroxy-6-hydroxymethyl-7,8-dihydropteridine:4-aminobenzoate 2-amino-4-hydroxydihydropteridine-6-methenyltransferase	0	0	0	0	0	0	0	0	0	1	NaN	0	0	0	0	0	1	NaN	0	0	0	0	0	0	0	0	0	0	1	NaN	0	0	0	0	0	1	NaN	0	0
521	0		0	0	[c] : dhpmp + h2o --> dhnpt + pi	Forward only	Folate biosynthesis	3.6.1.-	DNMPPA	Dihydroneopterin monophosphate dephosphorylase	0	0	0	0	0	0	0	0	0	1	NaN	0	0	0	0	0	1	NaN	0	0	0	0	0	0	0	0	0	0	1	NaN	0	0	0	0	0	1	NaN	0	0
522	0		0	0	[c] : ahdt + h2o --> dhpmp + ppi	Forward only	Folate biosynthesis	3.6.1.-	DNTPPA	Dihydroneopterin triphosphate pyrophosphatase	0	0	0	0	0	0	0	0	0	1	NaN	0	0	0	0	0	1	NaN	0	0	0	0	0	0	0	0	0	0	1	NaN	0	0	0	0	0	1	NaN	0	0
523	0		0	0	[c] : 2ahhmd + 4abz --> ppi + dhpt + h	Forward only	Folate biosynthesis	2.5.1.15	FOLD3	2-Amino-4-hydroxy-6-hydroxymethyl-7,8-dihydropteridine-diphosphate:4-aminobenzoate 2-amino-4-hydroxydihydropteridine-6-methenyltransferase	0	0	0	0	0	0	0	0	0	1	NaN	0	0	0	0	0	1	NaN	0	0	0	0	0	0	0	0	0	0	1	NaN	0	0	0	0	0	1	NaN	0	0
524	0		0	0	[c] : gtp + h2o --> ahdt + for + (2) h	Forward only	Folate biosynthesis	3.5.4.16	GTPCI	GTP 7,8-8,9-dihydrolase	0	0	0	0	0	0	0	0	0	1	NaN	0	0	0	0	0	1	NaN	0	0	0	0	0	0	0	0	0	0	1	NaN	0	0	0	0	0	1	NaN	0	0
525	0		0	0	[c] : atp + 2ahhmp --> amp + 2ahhmd	Forward only	Folate biosynthesis	2.7.6.3	HPPK	ATP:2-amino-4-hydroxy-6-hydroxymethyl-7,8-dihydropteridine 6'-pyrophosphotransferase	0	0	0	0	0	0	0	0	0	1	NaN	0	0	0	0	0	1	NaN	0	0	0	0	0	0	0	0	0	0	1	NaN	0	0	0	0	0	1	NaN	0	0
526	0		0	0	[c] : thfglu + h2o --> glu-L + thf + h	Forward only	Folate biosynthesis	3.4.19.9	THFGLUH	gamma-glutamyl hydrolase	0	0.0330484	1.75983e-05	3.54427e-06	0	0.0330484	2.0973e-05	0	4.5399e-06	1.48987e-43	1.00163	0	0.0330484	1.25546e-05	0	3.49652e-06	1.51009e-11	0.628688	0	0	0.0603123	2.55786e-05	6.66753e-06	0	0.0603123	2.91651e-05	0	8.12106e-06	8.74472e-20	1.12129	0	0.0956549	5.72784e-05	0	1.13422e-05	4.90288e-114	0.0162668	0	0
527	0		0	0	[c] : atp + thf + glu-L --> adp + pi + thfglu	Forward only	Folate biosynthesis	6.3.2.12;6.3.2.17	THFGLUS	Tetrahydrofolate:L-glutamate gamma-ligase (ADP-forming)	0	0.0330484	1.75983e-05	3.54427e-06	0	0.0330484	2.0973e-05	0	4.5399e-06	1.48987e-43	1.00163	0	0.0330484	1.25546e-05	0	3.49652e-06	1.51009e-11	0.628688	0	0	0.0603123	2.55786e-05	6.66753e-06	0	0.0603123	2.91651e-05	0	8.12106e-06	8.74472e-20	1.12129	0	0.0956549	5.72784e-05	0	1.13422e-05	4.90288e-114	0.0162668	0	0
528	0		0	0	[c] : fol + (2) nadh + (2) h --> thf + (2) nad	Forward only	Folate biosynthesis	1.5.1.3	THFOR1	5,6,7,8-Tetrahydrofolate:NAD+ oxidoreductase	0	0	0	0	0	0	0	0	0	1	NaN	0	0	0	0	0	1	NaN	0	0	0	0	0	0	0	0	0	0	1	NaN	0	0	0	0	0	1	NaN	0	0
529	0		0	0	[c] : fol + (2) nadph + (2) h --> thf + (2) nadp	Forward only	Folate biosynthesis	1.5.1.3	THFOR2	5,6,7,8-Tetrahydrofolate:NADP+ oxidoreductase	0	0	0	0	0	0	0	0	0	1	NaN	0	0	0	0	0	1	NaN	0	0	0	0	0	0	0	0	0	0	1	NaN	0	0	0	0	0	1	NaN	0	0
530	0		0	0	[m] : atp + thf + glu-L --> adp + pi + thfglu	Forward only	Folate biosynthesis	6.3.2.12;6.3.2.17	THFGLUSm	Tetrahydrofolate:L-glutamate gamma-ligase (ADP-forming)	0	0	0	0	0	0	0	0	0	1	NaN	0	0	0	0	0	1	NaN	0	0	0	0	0	0	0	0	0	0	1	NaN	0	0	0	0	0	1	NaN	0	0
531	1		0	0	[h] : glc-A <==> fru-B	Reversible	Fructose and mannose metabolism	5.3.1.5	AGAKI	alpha-D-Glucose aldose-ketose-isomerase	0.000850348	0.00489453	0.00311777	0.00312587	0.000850348	0.00489453	0.00311841	0	0.00312577	0.00787616	1.18529	0.000850348	0.00489453	0.00311379	0	0.00312429	1.93977e-38	0.0211573	0	0.000735064	0.00489453	0.00486335	0.00488299	0.000735064	0.00489453	0.00486344	0	0.00488067	7.6753e-32	1.47267	0.00168822	0.00489453	0.00486586	0	0.00488318	0.289462	0.444104	0	-0.00280111
532	0		0	0	[h] : f1p <==> dhap + glyald	Reversible	Fructose and mannose metabolism	4.1.2.13	FPGPL	D-Fructose 1-phosphate D-glyceraldehyde-3-phosphate-lyase	0	0	0	0	0	0	0	0	0	1	NaN	0	0	0	0	0	1	NaN	0	0	0	0	0	0	0	0	0	0	1	NaN	0	0	0	0	0	1	NaN	0	0
533	0		0	0	[h] : man <==> fru-B	Reversible	Fructose and mannose metabolism	5.3.1.7	MAKI	D-mannose aldose-ketose-isomerase	-0.00489453	-0.000850348	0	0	-0.00489453	-0.000850348	0	0	0	1	NaN	-0.00489453	-0.000850348	0	0	0	1	NaN	0	-0.00489453	-0.000735064	0	0	-0.00489453	-0.000735064	0	0	0	1	NaN	-0.00489453	-0.00168822	0	0	0	1	NaN	0	-0.00489453
534	0		0	0	[c] : man6p <==> f6p-B	Reversible	Fructose and mannose metabolism	5.3.1.8	MPAKI	D-mannose-6-phosphate aldose-ketose-isomerase	-0.00937452	0.00176498	1.31391e-07	0	-0.00937452	0.00176498	6.33336e-08	0	0	1	0.983298	-0.00937452	0.00176498	9.17438e-08	0	0	1	1.2179	0	-0.0180675	-0.00110799	0	0	-0.0180675	-0.00110799	0	0	0	1	NaN	-0.0163302	-0.00046847	0	0	0	1	NaN	0	-0.0745562
535	0		1	0	[c] : man6p <==> man1p	Reversible	Fructose and mannose metabolism	5.4.2.8	MPPM	D-Mannose 6-phosphate 1,6-phosphomutase	0	0.00937452	0.000678573	0.000445366	1.33045e-13	0.00937452	0.000792835	1	0.000544712	6.37195e-44	3.77888e-17	1.33035e-13	0.00937452	0.000475924	-1	0.000293865	4.82708e-117	1.52355e-66	1	0.00110799	0.0180675	0.00243922	0.00200865	0.00110799	0.0180675	0.00243819	0	0.00202695	0.010252	1.47193	0.00046847	0.0163302	0.00160424	0	0.00123631	0	6.21886e-288	0	0.0236923
536	0		0	0	[h] : sbt-D + nadp <==> glc-A + nadph + h	Reversible	Fructose and mannose metabolism	1.1.1.21	SBTRh	D-Glucitol:NADP+ 1-oxidoreductase	0	0	0	0	0	0	0	0	0	1	NaN	0	0	0	0	0	1	NaN	0	0	0	0	0	0	0	0	0	0	1	NaN	0	0	0	0	0	1	NaN	0	0
537	0		0	0	[h] : atp + fru-B --> adp + f1p + h	Forward only	Fructose and mannose metabolism	2.7.1.3	AF1PT	ATP:D-fructose 1-phosphotransferase	0	0	0	0	0	0	0	0	0	1	NaN	0	0	0	0	0	1	NaN	0	0	0	0	0	0	0	0	0	0	1	NaN	0	0	0	0	0	1	NaN	0	0
538	0		0	0	[c] : atp + man --> adp + man6p + h	Forward only	Fructose and mannose metabolism	2.7.1.1;2.7.1.2	AM6PT	ATP:D-mannose 6-phosphotransferase	0	0.00378327	1.64966e-06	0	0	0.00378327	2.19198e-06	0	0	1.67782e-12	0.640312	0	0.00378327	2.41314e-06	0	0	1.1251e-46	0.315944	0	0	0.00389111	6.04781e-07	0	0	0.00389111	7.70895e-07	0	0	2.52241e-06	1.18732	0	0.00274607	5.3221e-07	0	0	0.99914	1.28661	0	0
539	0		0	0	[h] : atp + man --> adp + man6p + h	Forward only	Fructose and mannose metabolism	2.7.1.1;2.7.1.2	AM6PTh	ATP:D-mannose 6-phosphotransferase, chloroplast	0	0	0	0	0	0	0	0	0	1	NaN	0	0	0	0	0	1	NaN	0	0	0	0	0	0	0	0	0	0	1	NaN	0	0	0	0	0	1	NaN	0	0
540	0		0	0	[c] : fdp-B + h2o --> f6p-B + pi	Forward only	Fructose and mannose metabolism	3.1.3.11;3.1.3.37	BFBP	beta-D-Fructose 1,6-bisphosphate 1-phosphohydrolase	0	0	0	0	0	0	0	0	0	1	NaN	0	0	0	0	0	1	NaN	0	0	0	0	0	0	0	0	0	0	1	NaN	0	0	0	0	0	1	NaN	0	0
541	0		0	0	[h] : fdp-B + h2o --> f6p-B + pi	Forward only	Fructose and mannose metabolism	3.1.3.11;3.1.3.37	BFBPh	beta-D-Fructose 1,6-bisphosphate 1-phosphohydrolase, chloroplast	0	0	0	0	0	0	0	0	0	1	NaN	0	0	0	0	0	1	NaN	0	0	0	0	0	0	0	0	0	0	1	NaN	0	0	0	0	0	1	NaN	0	0
542	0		0	0	[h] : f2p + h2o --> fru-B + pi	Forward only	Fructose and mannose metabolism	3.1.3.-	F2PP	D-Fructose 2-phosphate phosphatase	0	0	0	0	0	0	0	0	0	1	NaN	0	0	0	0	0	1	NaN	0	0	0	0	0	0	0	0	0	0	1	NaN	0	0	0	0	0	1	NaN	0	0
543	0		0	0	[c] : f26bp + h2o --> f6p-B + pi	Forward only	Fructose and mannose metabolism	3.1.3.46	FBPPH	D-Fructose-2,6-bisphosphate 2-phosphohydrolase	0	0.0330484	1.21269e-05	3.36868e-06	0	0.0330484	1.42614e-05	0	3.94755e-06	8.24844e-15	1.01576	0	0.0330484	1.06506e-05	0	3.36578e-06	5.94705e-15	1.11465	0	0	0.0603123	1.89478e-05	6.2472e-06	0	0.0603123	2.53923e-05	0	7.64499e-06	2.17001e-59	0.743961	0	0.0956549	4.55486e-05	0	1.09273e-05	4.28522e-244	0.0212602	0	0
544	0		1	0	[c] : gtp + man1p + h --> ppi + gdpmann	Forward only	Fructose and mannose metabolism	2.7.7.13	GAMPG	GTP:alpha-D-mannose-1-phosphate guanylyltransferase	0	0.00937452	0.000678573	0.000445366	1.33045e-13	0.00937452	0.000792835	1	0.000544712	6.37195e-44	3.77888e-17	1.33035e-13	0.00937452	0.000475924	-1	0.000293865	4.82708e-117	1.52355e-66	1	0.00110799	0.0180675	0.00243922	0.00200865	0.00110799	0.0180675	0.00243819	0	0.00202695	0.010252	1.47193	0.00046847	0.0163302	0.00160424	0	0.00123631	0	6.21886e-288	0	0.0236923
545	0		0	0	[c] : atp + f6p-B --> adp + f26bp + h	Forward only	Fructose and mannose metabolism	2.7.1.105	PFK26	ATP:D-fructose-6-phosphate 2-phosphotransferase	0	0.0330484	1.21269e-05	3.36868e-06	0	0.0330484	1.42614e-05	0	3.94755e-06	8.24844e-15	1.01576	0	0.0330484	1.06506e-05	0	3.36578e-06	5.94705e-15	1.11465	0	0	0.0603123	1.89478e-05	6.2472e-06	0	0.0603123	2.53923e-05	0	7.64499e-06	2.17001e-59	0.743961	0	0.0956549	4.55486e-05	0	1.09273e-05	4.28522e-244	0.0212602	0	0
546	0		0	0	[c] : udpg <==> udpgal	Reversible	Galactose metabolism	5.1.3.2	UG4E	UDP-glucose 4-epimerase	0.00126257	0.015655	0.00881824	0.00875046	0.00126257	0.015655	0.0087502	-1	0.00867684	0.000169639	0.00207686	0.00126257	0.015655	0.00916108	1	0.00904441	2.66129e-50	7.5287e-75	1	0.00227263	0.0282477	0.018987	0.0192473	0.00227263	0.0282477	0.0158445	-1	0.0156368	0	0	0.00210062	0.0246885	0.0150353	-1	0.0148939	0	0	1	0.00417342
547	0		0	0	[c] : 1Dgali + sucr --> inost + raffin	Forward only	Galactose metabolism	2.4.1.82	AGMIS	1-alpha-D-Galactosyl-myo-inositol:sucrose	0	0	0	0	0	0	0	0	0	1	NaN	0	0	0	0	0	1	NaN	0	0	0	0	0	0	0	0	0	0	1	NaN	0	0	0	0	0	1	NaN	0	0
548	0		0	0	[h] : epm + h2o --> man + gal	Forward only	Galactose metabolism	3.2.1.22	EMGH	epimelibiose galactohydrolase	0	0	0	0	0	0	0	0	0	1	NaN	0	0	0	0	0	1	NaN	0	0	0	0	0	0	0	0	0	0	1	NaN	0	0	0	0	0	1	NaN	0	0
549	0		0	0	[c] : atp + gal --> adp + gal1p + h	Forward only	Galactose metabolism	2.7.1.6	GALK	galactokinase	0	0.0330484	9.07049e-06	3.22108e-06	0	0.0330484	7.8522e-06	0	3.1012e-06	1.54019e-19	1.11249	0	0.0330484	1.02484e-05	0	3.03763e-06	1.57913e-14	1.19333	0	0	0.0603123	2.13921e-05	6.39755e-06	0	0.0603123	2.09559e-05	0	7.47697e-06	6.0296e-32	1.45056	0	0.0956549	3.41802e-05	0	1.11437e-05	1.85248e-266	0.20043	0	0
550	0		0	0	[h] : atp + gal --> adp + gal1p + h	Forward only	Galactose metabolism	2.7.1.6	GALKh	galactokinase, chloroplast	0	0	0	0	0	0	0	0	0	1	NaN	0	0	0	0	0	1	NaN	0	0	0	0	0	0	0	0	0	0	1	NaN	0	0	0	0	0	1	NaN	0	0
551	0		0	0	[n] : gal + o2 + h2o --> galctn-D + h2o2 + h	Forward only	Galactose metabolism	1.1.3.9	GALO	galactose oxidase	0	0	0	0	0	0	0	0	0	1	NaN	0	0	0	0	0	1	NaN	0	0	0	0	0	0	0	0	0	0	1	NaN	0	0	0	0	0	1	NaN	0	0
552	0		0	0	[h] : ggl + h2o --> gal + glyc	Forward only	Galactose metabolism	3.2.1.22	GGGH	galactosylglycerol galactohydrolase	0	0	0	0	0	0	0	0	0	1	NaN	0	0	0	0	0	1	NaN	0	0	0	0	0	0	0	0	0	0	1	NaN	0	0	0	0	0	1	NaN	0	0
553	0		0	0	[h] : 1Dgali + raffin --> inost + stc	Forward only	Galactose metabolism	2.4.1.67	GRGT	galactinol---raffinose galactosyltransferase	0	0	0	0	0	0	0	0	0	1	NaN	0	0	0	0	0	1	NaN	0	0	0	0	0	0	0	0	0	0	1	NaN	0	0	0	0	0	1	NaN	0	0
554	0		0	0	[c] : udpgal + inost --> udp + 1Dgali + h	Forward only	Galactose metabolism	2.4.1.123	IAGT	inositol 3-alpha-galactosyltransferase	0	0	0	0	0	0	0	0	0	1	NaN	0	0	0	0	0	1	NaN	0	0	0	0	0	0	0	0	0	0	1	NaN	0	0	0	0	0	1	NaN	0	0
555	0		0	0	[h] : lcts + h2o --> glc-A + gal	Forward only	Galactose metabolism	3.2.1.23	LCGH	Lactose galactohydrolase	0	0	0	0	0	0	0	0	0	1	NaN	0	0	0	0	0	1	NaN	0	0	0	0	0	0	0	0	0	0	1	NaN	0	0	0	0	0	1	NaN	0	0
556	0		0	0	[h] : melib + h2o --> gal + glc-A	Forward only	Galactose metabolism	3.2.1.22	MGHA	melibiose galactohydrolase (glc-A)	0	0	0	0	0	0	0	0	0	1	NaN	0	0	0	0	0	1	NaN	0	0	0	0	0	0	0	0	0	0	1	NaN	0	0	0	0	0	1	NaN	0	0
557	0		0	0	[h] : melib + h2o --> gal + glc-B	Forward only	Galactose metabolism	3.2.1.22	MGHB	melibiose galactohydrolase (glc-B)	0	0	0	0	0	0	0	0	0	1	NaN	0	0	0	0	0	1	NaN	0	0	0	0	0	0	0	0	0	0	1	NaN	0	0	0	0	0	1	NaN	0	0
558	0		0	0	[h] : melt + h2o --> sbt-D + gal	Forward only	Galactose metabolism	3.2.1.22	MLGH	Melibiitol galactohydrolase	0	0	0	0	0	0	0	0	0	1	NaN	0	0	0	0	0	1	NaN	0	0	0	0	0	0	0	0	0	0	1	NaN	0	0	0	0	0	1	NaN	0	0
559	0		0	0	[h] : mnt + h2o --> gal + melib	Forward only	Galactose metabolism	3.2.1.22	MTGH	manninotriose galactohydrolase	0	0	0	0	0	0	0	0	0	1	NaN	0	0	0	0	0	1	NaN	0	0	0	0	0	0	0	0	0	0	1	NaN	0	0	0	0	0	1	NaN	0	0
560	0		0	0	[h] : 1Dgali + h2o --> inost + gal	Forward only	Galactose metabolism	3.2.1.22	OAGMIG	3-O-alpha-D-Galactosyl-1D-myo-inositol galactohydrolase	0	0	0	0	0	0	0	0	0	1	NaN	0	0	0	0	0	1	NaN	0	0	0	0	0	0	0	0	0	0	1	NaN	0	0	0	0	0	1	NaN	0	0
561	0		0	0	[h] : raffin + h2o --> melib + fru-B	Forward only	Galactose metabolism	3.2.1.26	RFH	raffinose fructohydrolase	0	0	0	0	0	0	0	0	0	1	NaN	0	0	0	0	0	1	NaN	0	0	0	0	0	0	0	0	0	0	1	NaN	0	0	0	0	0	1	NaN	0	0
562	0		0	0	[h] : raffin + h2o --> gal + sucr	Forward only	Galactose metabolism	3.2.1.22	RGH	Raffinose galactohydrolase	0	0	0	0	0	0	0	0	0	1	NaN	0	0	0	0	0	1	NaN	0	0	0	0	0	0	0	0	0	0	1	NaN	0	0	0	0	0	1	NaN	0	0
563	0		0	0	[h] : stc + h2o --> mnt + fru-B	Forward only	Galactose metabolism	3.2.1.26	SFH	stachyose fructohydrolase	0	0	0	0	0	0	0	0	0	1	NaN	0	0	0	0	0	1	NaN	0	0	0	0	0	0	0	0	0	0	1	NaN	0	0	0	0	0	1	NaN	0	0
564	0		0	0	[h] : sucr + h2o --> fru-B + glc-A	Forward only	Galactose metabolism	3.2.1.20;3.2.1.3	SGHA	sucrose glucohydrolase (glc-A)	0	0	0	0	0	0	0	0	0	1	NaN	0	0	0	0	0	1	NaN	0	0	0	0	0	0	0	0	0	0	1	NaN	0	0	0	0	0	1	NaN	0	0
565	0		0	0	[h] : sucr + h2o --> fru-B + glc-B	Forward only	Galactose metabolism	3.2.1.20;3.2.1.3	SGHB	sucrose glucohydrolase (glc-B)	0	0	0	0	0	0	0	0	0	1	NaN	0	0	0	0	0	1	NaN	0	0	0	0	0	0	0	0	0	0	1	NaN	0	0	0	0	0	1	NaN	0	0
566	0		0	0	[h] : stc + h2o --> raffin + gal	Forward only	Galactose metabolism	3.2.1.22	SYGH	stachyose galactohydrolase	0	0	0	0	0	0	0	0	0	1	NaN	0	0	0	0	0	1	NaN	0	0	0	0	0	0	0	0	0	0	1	NaN	0	0	0	0	0	1	NaN	0	0
567	1		0	0	[c] : atp + glcur --> adp + glcur1p	Forward only	Galactose metabolism	2.7.1.43	GLCURK	Glucuronokinase	0	0.0330484	2.75092e-05	9.2008e-06	0	0.0330484	2.58108e-05	0	9.35304e-06	0.267496	1.23566	0	0.0330484	2.85119e-05	0	9.42671e-06	0.0231008	1.33629	0	0	0.0603123	5.64767e-05	1.76217e-05	0	0.0603123	8.47682e-05	0	3.04428e-05	1.76973e-152	0.0183505	0	0.0478275	5.47329e-05	0	1.74881e-05	0.0292584	1.30891	0	0
568	1		0	0	[m] : 4abut + akg <==> sucsal + glu-L	Reversible	Glutamate metabolism	2.6.1.19	ABAT	4-aminobutanoate:2-oxoglutarate aminotransferase	0	0.0110161	2.38166e-05	9.26354e-06	0	0.0110161	4.00985e-05	0	1.72668e-05	5.65534e-281	1.6929e-06	-9.49207e-27	0.0110161	2.85783e-05	0	1.01143e-05	6.21384e-11	0.25124	0	0	0.0201041	4.58344e-05	1.86893e-05	0	0.0201041	5.26672e-05	0	2.53085e-05	2.16184e-67	0.413696	0	0.0147161	3.49725e-05	0	1.38718e-05	1.26635e-63	0.0200825	0	0
569	1		0	0	[c] : glu-L + h --> 4abut + co2	Forward only	Glutamate metabolism	4.1.1.19	ARGD	arginine decarboxylase	0	0.0110161	9.84699e-06	3.41177e-06	0	0.0110161	2.3257e-05	0	9.32807e-06	0	3.98488e-08	0	0.0110161	1.33442e-05	0	3.4828e-06	2.54984e-31	0.21307	0	0	0.0201041	2.04169e-05	6.74485e-06	0	0.0201041	2.53871e-05	0	1.07047e-05	3.099e-114	0.385128	0	0.0147161	1.23484e-05	0	4.0122e-06	1.27425e-141	0.00668312	0	0
570	0		0	0	[h] : glu-L + h --> 4abut + co2	Forward only	Glutamate metabolism	4.1.1.19	ARGDh	arginine decarboxylase, chloroplast	0	0.00826211	2.29388e-06	0	0	0.00826211	1.03919e-06	0	0	3.6369e-52	0.33606	0	0.00826211	1.56668e-06	0	0	4.62341e-35	0.751252	0	0	0.0150781	4.5949e-06	0	0	0.0150781	3.50136e-06	0	0	0.00152681	0.976835	0	0.0147161	3.55395e-06	0	0	5.94705e-15	0.821199	0	0
571	0		0	0	[c] : atp + glu-L + nh4 --> adp + pi + gln-L + h	Forward only	Glutamate metabolism	6.3.1.2	GAL	glutamate---ammonia ligase, cytosol	0	11.6839	0.812098	0.509903	0	11.6839	1.98968	1	1.82145	0	0	0	0.549328	0.0243235	-1	0.0171472	0	0	1	0	14.4037	1.0587	0.700996	0	14.4037	3.03104	1	2.75158	0	0	0	0.136384	0.0184395	-1	0.0156203	0	0	1	0
572	1		0	0	[h] : gln-L + h2o --> glu-L + nh4	Forward only	Glutamate metabolism	3.5.1.2	GAM	glutaminase	0	11.5743	0.0530881	0.0200367	0	11.5743	0.0512373	0	0.0206967	0.00425103	1.14726	0	0.475542	0.000703329	0	0.000203475	0	1.19563e-68	0	0	14.2058	0.0741663	0.0302822	0	14.2058	0.0593477	0	0.0299236	0.524911	0.0106935	0	0.0956549	7.98978e-05	0	2.89212e-05	0	9.92695e-71	0	0
573	0		0	1	[c] : gthox + nadh + h --> (2) gthrd + nad	Forward only	Glutamate metabolism	1.8.1.7	GDR	glutathione-disulfide reductase	0	1.09096	0.000448838	0.000304762	0	1.09096	0.00107995	0	0.000599989	0	1.21734e-05	0	0.181062	0.000321377	0	0.000276932	1.67395e-35	0.208251	0	0	1.34697	0.00092599	0.000604364	0	1.34697	0.00298881	1	0.00167351	0	2.06167e-26	0	0.0762897	0.000454281	-1	0.0004457	1.69419e-256	6.63303e-15	1	0
574	0		0	0	[c] : gthox + nadph + h --> (2) gthrd + nadp	Forward only	Glutamate metabolism	1.8.1.7	GDR_nadp	glutathione-disulfide reductase (NADP)	0	1.09096	0.000747591	0.000510739	0	1.09096	0.000423561	-1	0.000209004	0	0.0110219	0	0.181062	0.000537427	-1	0.000415874	3.98222e-179	0.0223829	1	0	1.34697	0.00137959	0.00088015	0	1.34697	0.000703304	-1	0.000358691	0	0.000391752	0	0.0762897	0.000652792	-1	0.000599631	0	3.3696e-07	1	0
575	0		0	1	[h] : gthox + nadph + h --> (2) gthrd + nadp	Forward only	Glutamate metabolism	1.8.1.7	GDR_nadp_h	glutathione-disulfide reductase (NADP), chloroplast	0	0.0358632	0.0018469	0.00187899	0	0.0358632	0.000750775	0	0.000637148	0	0	0	0.0358632	0.00185971	0	0.00186377	0.0275967	0.632415	0	0	0.0653788	0.00329309	0.00332462	0	0.0653788	0.00134385	-1	0.00112363	0	0	0	0.148166	0.00357559	1	0.00330352	7.16504e-10	1.36543e-09	1	0
576	0		0	0	[m] : gthox + nadph + h --> (2) gthrd + nadp	Forward only	Glutamate metabolism	1.8.1.7	GDR_nadp_m	glutathione-disulfide reductase (NADP), mitochondria	0	0	0	0	0	0	0	0	0	1	NaN	0	0	0	0	0	1	NaN	0	0	0	0	0	0	0	0	0	0	1	NaN	0	0	0	0	0	1	NaN	0	0
577	0		0	0	[h] : gthox + nadh + h --> (2) gthrd + nad	Forward only	Glutamate metabolism	1.8.1.7	GDRh	glutathione-disulfide reductase, chloroplast	0	0.0358632	0.00109655	0.00103084	0	0.0358632	0.00220936	1	0.00227741	0	0	0	0.0358632	0.00118974	1	0.00112052	1.44455e-12	5.51974e-15	1	0	0.0653788	0.00205879	0.00194939	0	0.0653788	0.00401873	1	0.00414707	0	0	0	0.148166	0.00265541	1	0.00226869	3.60311e-36	4.07383e-33	1	0
578	0		0	0	[m] : gthox + nadh + h --> (2) gthrd + nad	Forward only	Glutamate metabolism	1.8.1.7	GDRm	glutathione-disulfide reductase, mitochondria	0	0	0	0	0	0	0	0	0	1	NaN	0	0	0	0	0	1	NaN	0	0	0	0	0	0	0	0	0	0	1	NaN	0	0	0	0	0	1	NaN	0	0
579	1		0	0	[c] : atp + gln-L + trnagln --> amp + ppi + glntrna + h	Forward only	Glutamate metabolism	6.1.1.18	GLNTL	glutamine---tRNA ligase	0.00489395	0.0214182	0.00490064	0.00489559	0.00489395	0.0214182	0.00490143	0	0.00489577	1.13105e-15	1.25323	0.00489395	0.0214182	0.00490191	0	0.00489581	2.26073e-12	1.00371	0	0.00880912	0.0389652	0.00882176	0.00881227	0.00880912	0.0389652	0.00882259	0	0.00881276	2.1348e-17	1.37968	0.0081424	0.0559699	0.00816654	0	0.0081481	0	0	0	0.00578538
580	1		0	0	[h] : gln-L + akg + (2) fdxrd --> (2) glu-L + (2) fdxox + (2) h	Forward only	Glutamate metabolism	1.4.7.1	GLUS_ferr	glutamate synthase (ferrodoxin dependent)	0	0.15803	0.00890034	0.00649402	0	0.111762	0.00876081	0	0.00645561	0.300914	0.688687	0	0.142255	0.00515467	0	0.00372537	0	3.49165e-204	0	0	0.28635	0.0161295	0.0118572	0	0.201913	0.0162069	0	0.0121334	0.00141485	1.30514	0	0.0367348	0.00204323	0	0.0019628	0	0	0	0
581	1		0	0	[c] : atp + glu-L + trnaglu --> amp + ppi + glutrna + h	Forward only	Glutamate metabolism	6.1.1.17	GLUTL	glutamate---tRNA ligase	0.00489395	0.0214182	0.00490255	0.00489549	0.00489395	0.0214182	0.00490246	0	0.004896	3.22842e-33	1.48911	0.00489395	0.0214182	0.00490125	0	0.0048955	0.227256	1.04057	0	0.00880912	0.0389652	0.00882227	0.00881247	0.00880912	0.0389652	0.00882243	0	0.00881263	0.000960997	1.47267	0.0081424	0.0559699	0.00816645	0	0.00814817	0	0	0	0.00578538
582	0		0	0	[h] : gln-L + prpp + h2o --> pram + ppi + glu-L + (2) h	Forward only	Glutamate metabolism	2.4.2.14	PRDPARh	5-phosphoribosylamine:diphosphate phospho-alpha-D-ribosyltransferase, chloroplast	0	0	0	0	0	0	0	0	0	1	NaN	0	0	0	0	0	1	NaN	0	0	0	0	0	0	0	0	0	0	1	NaN	0	0	0	0	0	1	NaN	0	0
583	0		0	0	[c] : glntrna + h2o --> gln-L + trnagln	Forward only	Glutamate metabolism	3.1.1.29	GLNTAH	glutamine-tRNA aminoacylhydrolase	0	0.0165242	6.52435e-06	1.63587e-06	0	0.0165242	7.34916e-06	0	1.81955e-06	1.13105e-15	1.236	0	0.0165242	7.81149e-06	0	1.85704e-06	2.26073e-12	0.998092	0	0	0.0301561	1.25856e-05	3.15547e-06	0	0.0301561	1.34295e-05	0	3.64591e-06	2.1348e-17	1.37968	0	0.0478275	2.4122e-05	0	5.70229e-06	1.21804e-203	0.0819514	0	0
584	0		0	0	[c] : glutrna + h2o --> glu-L + trnaglu	Forward only	Glutamate metabolism	3.1.1.29	GLUTAH	glutamate-tRNA aminoacylhydrolase	0	0.0165242	8.42409e-06	1.53822e-06	0	0.0165242	8.37477e-06	0	2.04122e-06	3.22842e-33	1.4933	0	0.0165242	7.11753e-06	0	1.54578e-06	0.227256	1.03942	0	0	0.0301561	1.31094e-05	3.34892e-06	0	0.0301561	1.32557e-05	0	3.51575e-06	0.000960997	1.47267	0	0.0478275	2.40287e-05	0	5.77167e-06	2.96347e-215	0.117564	0	0
585	0		0	0	[m] : glu-L + nad + h2o --> akg + nh4 + nadh + h	Forward only	Glutamate metabolism;Arginine and proline metabolism	1.4.1.2;1.4.1.3	GDHm	glutamate dehydrogenase, mitochondria	0	11.5743	1.41864	1.09531	0	11.5743	2.5743	1	2.43759	0	0	0	0.713314	0.0479882	-1	0.0307939	0	0	1	0	14.2058	1.80311	1.38972	0	14.2058	3.74077	1	3.56341	0	0	0	0.477539	0.0301406	-1	0.0191029	0	0	1	0
586	1		0	0	[h] : atp + glu-L + cys-L --> adp + pi + glucys + h	Forward only	Glutamate metabolism;Glutathione metabolism	6.3.2.2	GCL	glutamate---cysteine ligase	1.12463e-06	0.0330496	0.000280162	0.000111058	1.12463e-06	0.0330496	0.000295238	0	0.000142233	4.11015e-31	0.773844	1.12463e-06	0.0330496	6.98225e-05	0	2.45082e-05	0	1.99346e-49	0	2.02434e-06	0.0603143	0.000549377	0.00026082	2.02434e-06	0.0603143	0.000585712	0	0.000295374	5.40393e-11	0.562329	1.87112e-06	0.0478293	6.67592e-05	0	2.18545e-05	0	2.60641e-101	0	3.71746e-06
587	1		0	0	[h] : atp + glucys + gly --> adp + pi + gthrd + (2) h	Forward only	Glutamate metabolism;Glutathione metabolism	6.3.2.3	GTHS	glutathione synthase	1.12463e-06	0.0330496	0.000280162	0.000111058	1.12463e-06	0.0330496	0.000295238	0	0.000142233	4.11015e-31	0.773844	1.12463e-06	0.0330496	6.98225e-05	0	2.45082e-05	0	1.99346e-49	0	2.02434e-06	0.0603143	0.000549377	0.00026082	2.02434e-06	0.0603143	0.000585712	0	0.000295374	5.40393e-11	0.562329	1.87112e-06	0.0478293	6.67592e-05	0	2.18545e-05	0	2.60641e-101	0	3.71746e-06
588	1		0	0	[h] : atp + glu-L + nh4 --> adp + pi + gln-L + h	Forward only	Glutamate metabolism;Nitrogen metabolism	6.3.1.2	GALh	glutamate---ammonia ligase, chloroplast	0	11.6839	0.957099	0.68856	0	11.6839	0.993082	0	0.721574	3.3317e-05	0.109274	0	0.549328	0.0555622	0	0.0450472	0	0	0	0	14.4037	1.28923	0.937053	0	14.4037	1.27934	0	0.906997	0.0435635	1.16297	0	0.136384	0.0254129	0	0.0231674	0	0	0	0
589	0		1	0	[m] : atp + glu-L + nh4 --> adp + pi + gln-L + h	Forward only	Glutamate metabolism;Nitrogen metabolism	6.3.1.2	GALm	glutamate---ammonia ligase, mitochondria	0	0.0273237	0.00871116	0.00903247	0	0.0273237	0.00967175	1	0.0100059	1.32181e-261	5.60731e-242	0	0.0273237	0.0092179	1	0.00963158	1.4896e-83	2.50248e-63	1	0	0.0495952	0.0174665	0.0181092	0	0.0495952	0.0174536	0	0.0180684	0.00841783	1.28417	0	0.0353596	0.0144019	0	0.015108	0	0	0	0
590	0		0	0	[h] : gln-L + akg + nadh + h --> (2) glu-L + nad	Forward only	Glutamate metabolism;Nitrogen metabolism	1.4.1.14	GLUS	glutamate synthase (NADH)	0	11.6691	1.11665	0.804442	0	11.6691	2.30015	1	2.14317	0	0	0	0.524879	0.0339014	-1	0.0239869	0	0	1	0	14.3768	1.48525	1.0762	0	14.3768	1.35237	-1	0.957354	3.52409e-14	1.27924e-07	0	0.0956549	0.00931043	-1	0.00493797	0	0	1	0
591	0		1	0	[h] : glu-L + nad + h2o --> akg + nh4 + nadh + h	Forward only	Glutamate metabolism;Nitrogen metabolism;Arginine and proline metabolism	1.4.1.2;1.4.1.3	GDH	glutamate dehydrogenase	0	11.5743	0.0901265	0.0401288	0	11.5743	0.110124	1	0.0532653	8.89216e-41	0.00058303	0	0.713314	0.00735652	-1	0.00328926	0	6.5843e-121	1	0	14.2058	0.103991	0.0457599	0	14.2058	0.117694	0	0.0642911	1.53735e-57	0.076746	0	0.477539	0.00340302	0	0.00163183	0	9.35168e-110	0	0
592	0		0	1	[h] : glu-L + nadp + h2o --> akg + nh4 + nadph + h	Forward only	Glutamate metabolism;Nitrogen metabolism;Arginine and proline metabolism	1.4.1.3;1.4.1.4	GDH_nadp	glutamate dehydrogenase [NAD(P)+]	0	11.5743	0.190788	0.0931032	0	11.5743	0.191679	0	0.100749	0.00191407	1.44559	0	0.713314	0.0116081	0	0.00530582	0	5.71591e-217	0	0	14.2058	0.229626	0.118619	0	14.2058	0.270447	1	0.144703	1.83121e-21	0.000286803	0	0.477539	0.00735544	-1	0.00353487	0	1.01326e-226	1	0
593	0		0	0	[c] : amp + hso3 + gthox + h <==> aps + (2) gthrd	Reversible	Glutathione metabolism	1.8.4.9	GTHAMPOR	AMP,sulfite:glutathione-disulfide oxidoreductase (adenosine-5'-phosphosulfate-forming), cytosol	-0.0170963	-0.000572111	0	0	-0.0170963	-0.000572111	0	0	0	1	NaN	-0.0170963	-0.000572111	0	0	0	1	NaN	0	-0.0311859	-0.0010298	0	0	-0.0311859	-0.0010298	0	0	0	1	NaN	-0.0368225	-0.000951859	0	0	0	1	NaN	0	-0.057651
594	0		0	0	[h] : amp + hso3 + gthox + h <==> aps + (2) gthrd	Reversible	Glutathione metabolism	1.8.4.9	GTHAMPORh	AMP,sulfite:glutathione-disulfide oxidoreductase (adenosine-5'-phosphosulfate-forming), chloroplast	0	0	0	0	0	0	0	0	0	1	NaN	0	0	0	0	0	1	NaN	0	0	0	0	0	0	0	0	0	0	1	NaN	0	0	0	0	0	1	NaN	0	0
595	0		0	0	[m] : amp + hso3 + gthox + h <==> aps + (2) gthrd	Reversible	Glutathione metabolism	1.8.4.9	GTHAMPORm	AMP,sulfite:glutathione-disulfide oxidoreductase (adenosine-5'-phosphosulfate-forming), mitochondria	0	0	0	0	0	0	0	0	0	1	NaN	0	0	0	0	0	1	NaN	0	0	0	0	0	0	0	0	0	0	1	NaN	0	0	0	0	0	1	NaN	0	0
596	0		0	0	[h] : protdt + gthox <==> protds + (2) gthrd	Reversible	Glutathione metabolism	1.8.4.2	GTHPDSOR	glutathione:protein-disulfide oxidoreductase	-0.0050018	-0.00281477	0	0	-0.0050018	-0.00281477	0	0	0	1	NaN	-0.0050018	-0.00281477	0	0	0	1	NaN	0	-0.00905784	-0.00506659	0	0	-0.00905784	-0.00506659	0	0	0	1	NaN	-0.00722388	-0.00468312	0	0	0	1	NaN	0	-0.0129111
597	0		0	1	[c] : h2o2 + (2) gthrd --> gthox + (2) h2o	Forward only	Glutathione metabolism	1.11.1.9	GTHP	glutathione:hydrogen-peroxide oxidoreductase	0	1.09039	0.000588091	0.000211247	0	1.09039	0.000898272	0	0.000228751	1.03516e-16	0.209953	0	0.18049	0.000254398	0	7.06525e-05	0	0.00583761	0	0	1.34594	0.00121637	0.000388422	0	1.34594	0.00258817	1	0.00101906	0	4.61001e-07	0	0.0753379	7.96246e-05	-1	2.58808e-05	0	9.53814e-14	1	0
598	0		0	0	[c] : 5op + (2) h2o + atp --> h + glu-L + pi + adp	Forward only	Glutathione metabolism	3.5.2.9	OPAH	5-oxo-L-proline amidohydrolase (ATP-hydrolysing)	0	0	0	0	0	0	0	0	0	1	NaN	0	0	0	0	0	1	NaN	0	0	0	0	0	0	0	0	0	0	1	NaN	0	0	0	0	0	1	NaN	0	0
599	1		0	0	[c] : gthrd + h2o --> cys-gly + glu-L	Forward only	Glutathione metabolism	3.4.19.13	GGGAP	glutathione gamma-glutamylaminopeptidase	0	0.0330484	0.000279036	0.000109933	0	0.0330484	0.000294112	0	0.000141108	4.11015e-31	0.773844	0	0.0330484	6.86933e-05	0	2.33835e-05	0	1.99346e-49	0	0	0.0603123	0.00054735	0.000258795	0	0.0603123	0.000583687	0	0.00029335	5.40393e-11	0.562329	0	0.0478275	6.48813e-05	0	1.99834e-05	0	2.98363e-101	0	0
600	1		0	0	[c] : cys-gly + h2o + h --> cys-L + gly	Forward only	Glutathione metabolism	3.4.11.1; 3.4.11.2	CGDP	L-cysteinylglycine dipeptidase	0	0.0330484	0.000279036	0.000109933	0	0.0330484	0.000294112	0	0.000141108	4.11015e-31	0.773844	0	0.0330484	6.86933e-05	0	2.33835e-05	0	1.99346e-49	0	0	0.0603123	0.00054735	0.000258795	0	0.0603123	0.000583687	0	0.00029335	5.40393e-11	0.562329	0	0.0478275	6.48813e-05	0	1.99834e-05	0	2.98363e-101	0	0
601	0		1	0	[c] : glyald + nadh + h <==> glyc + nad	Reversible	Glycerolipid metabolism	1.1.1.2	ALCD19	alcohol dehydrogenase (glycerol, NAD)	-1000	1000	536.056	578.42	-1000	1000	190.482	-1	147.493	0	0	-1000	1000	207.363	-1	174.574	0	0	1	-1000	1000	521.537	572.555	-1000	1000	524.335	0	575.158	0.236861	1.06062	-1000	1000	469.598	0	499.355	2.10465e-25	1.0523e-27	0	-1000
602	0		0	0	[c] : glyald + nadph + h <==> glyc + nadp	Reversible	Glycerolipid metabolism	1.1.1.2	ALCD19y	alcohol dehydrogenase (glycerol, NADP)	-1000	1000	3.02059	0	-1000	1000	28.412	1	0	1.43474e-52	2.34682e-105	-1000	1000	27.1777	1	0	2.98595e-49	3.15409e-99	1	-1000	1000	3.77671	0	-1000	1000	1.93981	0	0	0.911008	0.00207702	-1000	1000	6.96602	0	0	0.200207	6.47297e-05	0	-1000
603	0		0	0	[c] : glyc-R + nadh + (2) h <==> glyald + nad + h2o	Reversible	Glycerolipid metabolism	1.2.1.3	GLYALDOR	glyceraldehyde oxidoreductase (NAD)	-0.00646661	0.00220689	0.000668505	0.000700604	-0.00646661	0.00220689	0.000722934	1	0.000757868	1.74271e-11	1.83903e-14	-0.00646661	0.00220689	0.000718167	1	0.00065574	3.26138e-102	5.28117e-16	1	-0.0117774	0.00398571	0.00140565	0.00135092	-0.0117774	0.00398571	0.00159122	1	0.00152938	3.27476e-124	3.8605e-83	-0.0230406	0.00326762	0.00050361	-1	0.000447719	0	0	1	-0.0215524
604	0		0	0	[c] : 12dgr16018111Z + pmtcoa --> tag16018111Z160 + coa	Forward only	Glycerolipid metabolism	2.3.1.20	ACOADAGAT16018111Z160	acyl-CoA: diacylglycerol acyltransferase (16:0)	0	0.0195104	6.09164e-05	2.84439e-05	0	0.0195104	6.65998e-05	0	3.49245e-05	7.59084e-25	0.22605	0	0.0195104	7.94658e-05	0	3.9109e-05	5.31861e-62	4.64221e-08	0	0	0.0355312	0.000164422	9.16719e-05	0	0.0355312	0.000125845	-1	6.8356e-05	1.61528e-64	1.62578e-08	0	0.0529799	0.000141333	-1	7.04135e-05	6.60918e-50	0.00242693	1	0
605	1		0	0	[c] : 12dgr16018111Z + ocdccoa --> tag16018111Z180 + coa	Forward only	Glycerolipid metabolism	2.3.1.20	ACOADAGAT16018111Z180	acyl-CoA: diacylglycerol acyltransferase (18:0)	2.4501e-05	0.0165487	3.14371e-05	2.62955e-05	2.4501e-05	0.0165487	3.24236e-05	0	2.64789e-05	1.83006e-07	1.1505	2.4501e-05	0.0165487	3.13402e-05	0	2.62515e-05	2.48084e-08	1.4701	0	4.41018e-05	0.0302002	5.32462e-05	4.74621e-05	4.41018e-05	0.0302002	5.78456e-05	0	4.80612e-05	1.76802e-29	0.499145	4.07639e-05	0.0478682	6.62856e-05	0	4.65859e-05	6.44998e-185	0.0307398	0	8.09879e-05
606	0		0	0	[c] : 12dgr16018111Z + ocdcecoa --> tag16018111Z18111Z + coa	Forward only	Glycerolipid metabolism	2.3.1.20	ACOADAGAT16018111Z18111Z	acyl-CoA: diacylglycerol acyltransferase (18:1(11Z))	0	0.0165488	7.7912e-06	3.58197e-06	0	0.0165488	6.50966e-06	0	3.58027e-06	5.67714e-14	0.906895	0	0.0165488	1.8676e-05	0	1.33163e-05	0	6.82495e-07	0	0	0.0302003	3.37139e-05	2.4754e-05	0	0.0302003	3.55513e-05	0	2.49673e-05	0.0192675	1.18732	0	0.0478683	1.66365e-05	0	8.02217e-06	0	0.000205789	0	0
607	0		1	0	[c] : 12dgr16018111Z + ocdce9coa --> tag16018111Z1819Z + coa	Forward only	Glycerolipid metabolism	2.3.1.20	ACOADAGAT16018111Z1819Z	acyl-CoA: diacylglycerol acyltransferase (18:1(9Z))	0	0.0178763	1.99324e-05	8.06824e-06	0	0.0178763	2.85608e-05	1	1.86423e-05	0	0.00128588	0	0.0178763	2.80475e-05	1	1.7103e-05	0	0.00216015	1	0	0.0325899	5.21357e-05	3.23747e-05	0	0.0325899	5.41078e-05	0	3.33622e-05	0.0217537	1.19962	0	0.050077	5.28884e-05	0	2.96478e-05	2.31816e-11	1.37673	0	0
608	1		0	0	[c] : 12dgr16018111Z + pacoa --> tag16018111Z1835Z9Z12Z + coa	Forward only	Glycerolipid metabolism	2.3.1.20	ACOADAGAT16018111Z1835Z9Z12Z	acyl-CoA: diacylglycerol acyltransferase (18:3(5Z,9Z,12Z))	2.46743e-05	0.0165489	3.16327e-05	2.63395e-05	2.46743e-05	0.0165489	3.13247e-05	0	2.65189e-05	1.57255e-09	1.42244	2.46743e-05	0.0165489	3.01363e-05	0	2.64533e-05	4.36628e-30	0.8344	0	4.44137e-05	0.0302005	5.85479e-05	4.7585e-05	4.44137e-05	0.0302005	6.64755e-05	0	4.99491e-05	4.83086e-149	0.266843	4.10523e-05	0.0478685	6.29102e-05	0	4.64053e-05	1.94307e-211	0.61681	0	8.15607e-05
609	1		0	0	[c] : 12dgr16018111Z + cacoa --> tag16018111Z1845Z9Z12Z15Z + coa	Forward only	Glycerolipid metabolism	2.3.1.20	ACOADAGAT16018111Z1845Z9Z12Z15Z	acyl-CoA: diacylglycerol acyltransferase (18:4(5Z,9Z,12Z,15Z))	2.47324e-05	0.016549	3.08509e-05	2.63266e-05	2.47324e-05	0.016549	3.12949e-05	0	2.65062e-05	4.88692e-21	1.38526	2.47324e-05	0.016549	3.26421e-05	0	2.64522e-05	1.89898e-20	0.811673	0	4.45183e-05	0.0302006	5.80372e-05	4.79521e-05	4.45183e-05	0.0302006	5.89733e-05	0	4.85902e-05	2.47265e-18	1.35719	4.1149e-05	0.0478686	5.97922e-05	0	4.62266e-05	6.27017e-200	1.16987	0	8.17528e-05
610	0		0	0	[c] : 12dgr1601819Z + pmtcoa --> tag1601819Z160 + coa	Forward only	Glycerolipid metabolism	2.3.1.20	ACOADAGAT1601819Z160	acyl-CoA: diacylglycerol acyltransferase (16:0)	0	0.0195104	7.42815e-05	3.58157e-05	0	0.0195104	6.99486e-05	0	3.69083e-05	0.0389586	0.405382	0	0.0195104	7.75264e-05	0	3.93583e-05	1.65541e-06	0.542494	0	0	0.0355312	0.000144714	8.05807e-05	0	0.0355312	0.000133803	0	7.65572e-05	9.14861e-05	0.206542	0	0.0529799	0.000131867	0	6.67092e-05	4.62677e-26	0.0927485	0	0
611	1		0	0	[c] : 12dgr1601819Z + ocdccoa --> tag1601819Z180 + coa	Forward only	Glycerolipid metabolism	2.3.1.20	ACOADAGAT1601819Z180	acyl-CoA: diacylglycerol acyltransferase (18:0)	2.4501e-05	0.0165487	3.26324e-05	2.61847e-05	2.4501e-05	0.0165487	3.13926e-05	0	2.6402e-05	6.13804e-17	1.10643	2.4501e-05	0.0165487	3.36369e-05	0	2.61946e-05	0.40375	1.17094	0	4.41018e-05	0.0302002	5.45859e-05	4.75672e-05	4.41018e-05	0.0302002	5.50539e-05	0	4.76522e-05	1.87188e-10	1.39556	4.07639e-05	0.0478682	5.8848e-05	0	4.60595e-05	4.83086e-149	0.495358	0	8.09879e-05
612	0		0	0	[c] : 12dgr1601819Z + ocdcecoa --> tag1601819Z18111Z + coa	Forward only	Glycerolipid metabolism	2.3.1.20	ACOADAGAT1601819Z18111Z	acyl-CoA: diacylglycerol acyltransferase (18:1(11Z))	0	0.0165488	6.41593e-06	3.53737e-06	0	0.0165488	7.25859e-06	0	3.64406e-06	0.0670209	1.11249	0	0.0165488	1.82474e-05	0	1.34943e-05	0	4.20648e-09	0	0	0.0302003	3.67187e-05	2.62184e-05	0	0.0302003	3.43179e-05	0	2.60637e-05	0.041205	1.08485	0	0.0478683	1.5115e-05	0	7.75686e-06	0	1.24605e-05	0	0
613	0		1	0	[c] : 12dgr1601819Z + ocdce9coa --> tag1601819Z1819Z + coa	Forward only	Glycerolipid metabolism	2.3.1.20	ACOADAGAT1601819Z1819Z	acyl-CoA: diacylglycerol acyltransferase (18:1(9Z))	0	0.0178763	1.65602e-05	7.00677e-06	0	0.0178763	2.92485e-05	1	1.83078e-05	0	6.33014e-09	0	0.0178763	2.74346e-05	1	1.64718e-05	0	4.60086e-06	1	0	0.0325899	4.87822e-05	3.10796e-05	0	0.0325899	5.1232e-05	0	3.16628e-05	0.0141253	1.13283	0	0.050077	6.35313e-05	0	3.23345e-05	8.2061e-11	0.0567374	0	0
614	1		0	0	[c] : 12dgr1601819Z + pacoa --> tag1601819Z1835Z9Z12Z + coa	Forward only	Glycerolipid metabolism	2.3.1.20	ACOADAGAT1601819Z1835Z9Z12Z	acyl-CoA: diacylglycerol acyltransferase (18:3(5Z,9Z,12Z))	2.46743e-05	0.0165489	3.05455e-05	2.63764e-05	2.46743e-05	0.0165489	3.29945e-05	0	2.64998e-05	1.77095e-24	0.574608	2.46743e-05	0.0165489	3.44343e-05	0	2.72489e-05	2.13325e-183	0.237907	0	4.44137e-05	0.0302005	6.01092e-05	4.77447e-05	4.44137e-05	0.0302005	5.54732e-05	0	4.81178e-05	1.57932e-31	0.545177	4.10523e-05	0.0478685	5.89465e-05	0	4.62642e-05	5.72827e-103	1.2898	0	8.15607e-05
615	1		0	0	[c] : 12dgr1601819Z + cacoa --> tag1601819Z1845Z9Z12Z15Z + coa	Forward only	Glycerolipid metabolism	2.3.1.20	ACOADAGAT1601819Z1845Z9Z12Z15Z	acyl-CoA: diacylglycerol acyltransferase (18:4(5Z,9Z,12Z,15Z))	2.47324e-05	0.016549	3.10212e-05	2.62741e-05	2.47324e-05	0.016549	3.08203e-05	0	2.66513e-05	6.72353e-72	1.44452	2.47324e-05	0.016549	3.10512e-05	0	2.63019e-05	0.432471	1.49708	0	4.45183e-05	0.0302006	5.42616e-05	4.77573e-05	4.45183e-05	0.0302006	5.64469e-05	0	4.79875e-05	1.33784e-06	0.989526	4.1149e-05	0.0478686	7.61919e-05	0	5.01465e-05	2.23157e-178	0.000848086	0	8.17528e-05
616	0		0	1	[c] : 12dgr1801819Z + pmtcoa --> tag1801819Z160 + coa	Forward only	Glycerolipid metabolism	2.3.1.20	ACOADAGAT1801819Z160	acyl-CoA: diacylglycerol acyltransferase (16:0)	0	0.0195096	7.48321e-05	3.64212e-05	0	0.0195096	6.57879e-05	0	3.57332e-05	0.0542081	0.0191983	0	0.0195096	7.36438e-05	0	3.7096e-05	0.133857	1.19702	0	0	0.0355297	0.000152415	8.87496e-05	0	0.0355297	0.000119807	-1	6.43608e-05	7.52907e-73	8.69809e-07	0	0.0529785	0.000135111	-1	7.02111e-05	2.01497e-40	0.0211906	1	0
617	1		0	0	[c] : 12dgr1801819Z + ocdccoa --> tag1801819Z180 + coa	Forward only	Glycerolipid metabolism	2.3.1.20	ACOADAGAT1801819Z180	acyl-CoA: diacylglycerol acyltransferase (18:0)	2.37283e-05	0.0165479	3.31663e-05	2.63865e-05	2.37283e-05	0.0165479	3.35857e-05	0	2.64973e-05	4.68755e-06	1.40835	2.37283e-05	0.0165479	3.58139e-05	0	2.65641e-05	1.94617e-08	0.705375	0	4.2711e-05	0.0301988	6.58298e-05	4.78855e-05	4.2711e-05	0.0301988	5.43006e-05	0	4.68659e-05	1.11103e-29	0.0140881	3.94784e-05	0.0478669	6.2125e-05	0	4.52808e-05	6.15887e-173	0.816632	0	7.84339e-05
618	0		0	0	[c] : 12dgr1801819Z + ocdcecoa --> tag1801819Z18111Z + coa	Forward only	Glycerolipid metabolism	2.3.1.20	ACOADAGAT1801819Z18111Z	acyl-CoA: diacylglycerol acyltransferase (18:1(11Z))	0	0.016548	8.50068e-06	3.2351e-06	0	0.016548	5.08381e-06	0	3.44216e-06	1.23118e-16	0.0679828	0	0.016548	1.73034e-05	0	1.28577e-05	0	0.000120716	0	0	0.0301989	3.49823e-05	2.49156e-05	0	0.0301989	3.4363e-05	0	2.4954e-05	0.82007	1.40385	0	0.047867	1.68867e-05	0	7.3211e-06	0	0.000235771	0	0
619	0		1	0	[c] : 12dgr1801819Z + ocdce9coa --> tag1801819Z1819Z + coa	Forward only	Glycerolipid metabolism	2.3.1.20	ACOADAGAT1801819Z1819Z	acyl-CoA: diacylglycerol acyltransferase (18:1(9Z))	0	0.0178755	1.34044e-05	6.75285e-06	0	0.0178755	2.73216e-05	1	1.74345e-05	0	2.56284e-11	0	0.0178755	3.00989e-05	1	1.73982e-05	0	2.60308e-13	1	0	0.0325885	4.59423e-05	2.92456e-05	0	0.0325885	5.37646e-05	0	3.48427e-05	1.30003e-41	0.194977	0	0.0500757	4.8619e-05	0	2.85342e-05	0.000820928	1.00018	0	0
620	1		0	0	[c] : 12dgr1801819Z + pacoa --> tag1801819Z1835Z9Z12Z + coa	Forward only	Glycerolipid metabolism	2.3.1.20	ACOADAGAT1801819Z1835Z9Z12Z	acyl-CoA: diacylglycerol acyltransferase (18:3(5Z,9Z,12Z))	2.38908e-05	0.0165481	3.12424e-05	2.5636e-05	2.38908e-05	0.0165481	2.90057e-05	0	2.57561e-05	4.23182e-06	0.616851	2.38908e-05	0.0165481	3.46929e-05	0	2.59145e-05	2.64448e-40	0.376454	0	4.30035e-05	0.0301991	5.88867e-05	4.7889e-05	4.30035e-05	0.0301991	6.10865e-05	0	4.71564e-05	1.43712e-47	1.12842	3.97488e-05	0.0478672	6.05797e-05	0	4.52094e-05	1.93103e-290	1.18537	0	7.8971e-05
621	1		0	0	[c] : 12dgr1801819Z + cacoa --> tag1801819Z1845Z9Z12Z15Z + coa	Forward only	Glycerolipid metabolism	2.3.1.20	ACOADAGAT1801819Z1845Z9Z12Z15Z	acyl-CoA: diacylglycerol acyltransferase (18:4(5Z,9Z,12Z,15Z))	2.39453e-05	0.0165482	3.53023e-05	2.66252e-05	2.39453e-05	0.0165482	3.14315e-05	0	2.58951e-05	1.27677e-68	0.35979	2.39453e-05	0.0165482	3.37999e-05	0	2.65135e-05	3.55973e-08	1.04108	0	4.31016e-05	0.0301992	6.02272e-05	4.66039e-05	4.31016e-05	0.0301992	5.52705e-05	0	4.65843e-05	0.000758289	0.526807	3.98394e-05	0.0478673	6.21051e-05	0	4.51398e-05	1.37404e-123	1.17819	0	7.91511e-05
622	1		0	0	[c] : 12dgr18111Z18111Z + pmtcoa --> tag18111Z18111Z160 + coa	Forward only	Glycerolipid metabolism	2.3.1.20	ACOADAGAT18111Z18111Z160	acyl-CoA: diacylglycerol acyltransferase (16:0)	0	0.0195096	6.67789e-05	3.13538e-05	0	0.0195096	6.54918e-05	0	3.34982e-05	6.35557e-06	1.20132	0	0.0195096	7.67512e-05	0	3.64005e-05	3.16225e-13	0.00836724	0	0	0.0355298	0.000147547	8.47383e-05	0	0.0355298	0.000135846	0	7.73405e-05	3.60352e-07	0.211008	0	0.0529786	0.00013806	0	6.84949e-05	5.27981e-33	0.297894	0	0
623	1		0	0	[c] : 12dgr18111Z18111Z + ocdccoa --> tag18111Z18111Z180 + coa	Forward only	Glycerolipid metabolism	2.3.1.20	ACOADAGAT18111Z18111Z180	acyl-CoA: diacylglycerol acyltransferase (18:0)	2.37823e-05	0.016548	3.18876e-05	2.54755e-05	2.37823e-05	0.016548	3.0358e-05	0	2.56718e-05	3.45558e-16	0.992778	2.37823e-05	0.016548	2.97191e-05	0	2.55585e-05	1.55009e-05	0.596095	0	4.28082e-05	0.0301989	6.24272e-05	4.71381e-05	4.28082e-05	0.0301989	6.2829e-05	0	4.87838e-05	6.59158e-94	1.44334	3.95683e-05	0.047867	6.05788e-05	0	4.48006e-05	2.12409e-141	1.15258	0	7.86124e-05
624	0		0	0	[c] : 12dgr18111Z18111Z + ocdcecoa --> tag18111Z18111Z18111Z + coa	Forward only	Glycerolipid metabolism	2.3.1.20	ACOADAGAT18111Z18111Z18111Z	acyl-CoA: diacylglycerol acyltransferase (18:1(11Z))	0	0.0165481	6.1306e-06	3.14141e-06	0	0.0165481	5.411e-06	0	3.47973e-06	1.34328e-14	1.03902	0	0.0165481	1.74985e-05	0	1.28726e-05	0	4.81227e-08	0	0	0.030199	3.0356e-05	2.39904e-05	0	0.030199	3.42573e-05	0	2.52784e-05	1.05337e-08	0.560203	0	0.0478671	1.42731e-05	0	7.46561e-06	0	6.35554e-09	0	0
625	1		0	0	[c] : 12dgr18111Z18111Z + ocdce9coa --> tag18111Z18111Z1819Z + coa	Forward only	Glycerolipid metabolism	2.3.1.20	ACOADAGAT18111Z18111Z1819Z	acyl-CoA: diacylglycerol acyltransferase (18:1(9Z))	0	0.0178756	2.02171e-05	7.63415e-06	0	0.0178756	2.65352e-05	0	1.66457e-05	0	0.0561919	0	0.0178756	2.82834e-05	0	1.66526e-05	0	0.0118929	0	0	0.0325886	5.3317e-05	3.11548e-05	0	0.0325886	5.30837e-05	0	3.44478e-05	5.67714e-14	1.46841	0	0.0500758	5.48918e-05	0	2.94375e-05	5.02924e-07	1.22487	0	0
626	1		0	0	[c] : 12dgr18111Z18111Z + pacoa --> tag18111Z18111Z1835Z9Z12Z + coa	Forward only	Glycerolipid metabolism	2.3.1.20	ACOADAGAT18111Z18111Z1835Z9Z12Z	acyl-CoA: diacylglycerol acyltransferase (18:3(5Z,9Z,12Z))	2.39456e-05	0.0165482	3.08336e-05	2.55957e-05	2.39456e-05	0.0165482	3.17487e-05	0	2.66655e-05	2.39048e-226	1.20119	2.39456e-05	0.0165482	3.00975e-05	0	2.56401e-05	6.23508e-24	1.2186	0	4.31021e-05	0.0301992	6.08066e-05	4.68069e-05	4.31021e-05	0.0301992	5.92171e-05	0	4.70638e-05	0.000700148	1.2439	3.98399e-05	0.0478673	6.05333e-05	0	4.51797e-05	7.77656e-125	1.45421	0	7.9152e-05
627	1		0	0	[c] : 12dgr18111Z18111Z + cacoa --> tag18111Z18111Z1845Z9Z12Z15Z + coa	Forward only	Glycerolipid metabolism	2.3.1.20	ACOADAGAT18111Z18111Z1845Z9Z12Z15Z	acyl-CoA: diacylglycerol acyltransferase (18:4(5Z,9Z,12Z,15Z))	2.40003e-05	0.0165482	3.1565e-05	2.56766e-05	2.40003e-05	0.0165482	3.03862e-05	0	2.58427e-05	6.82073e-16	1.11741	2.40003e-05	0.0165482	3.03069e-05	0	2.56279e-05	4.731e-12	0.994731	0	4.32006e-05	0.0301993	5.53285e-05	4.63215e-05	4.32006e-05	0.0301993	6.53538e-05	0	4.93069e-05	5.30521e-261	0.111834	3.99309e-05	0.0478674	6.00842e-05	0	4.53128e-05	4.51876e-140	0.632796	0	7.93329e-05
628	0		1	0	[c] : 12dgr18111Z1819Z + pmtcoa --> tag18111Z1819Z160 + coa	Forward only	Glycerolipid metabolism	2.3.1.20	ACOADAGAT18111Z1819Z160	acyl-CoA: diacylglycerol acyltransferase (16:0)	0	0.0195096	6.42546e-05	3.32615e-05	0	0.0195096	7.32775e-05	1	3.74261e-05	1.08197e-10	0.0202169	0	0.0195096	7.59657e-05	1	4.00601e-05	4.91974e-23	0.000600835	1	0	0.0355298	0.000152364	8.10566e-05	0	0.0355298	0.000134791	0	7.36269e-05	1.02907e-07	0.0270228	0	0.0529786	0.000141465	0	7.07386e-05	5.04667e-15	0.230018	0	0
629	1		0	0	[c] : 12dgr18111Z1819Z + ocdccoa --> tag18111Z1819Z180 + coa	Forward only	Glycerolipid metabolism	2.3.1.20	ACOADAGAT18111Z1819Z180	acyl-CoA: diacylglycerol acyltransferase (18:0)	2.37823e-05	0.016548	3.30217e-05	2.56154e-05	2.37823e-05	0.016548	3.07825e-05	0	2.56373e-05	1.5814e-15	0.748739	2.37823e-05	0.016548	3.17271e-05	0	2.5607e-05	1.0634e-09	1.03836	0	4.28082e-05	0.0301989	5.52835e-05	4.61193e-05	4.28082e-05	0.0301989	5.75208e-05	0	4.65821e-05	3.00379e-14	1.08315	3.95683e-05	0.047867	6.31318e-05	0	4.51433e-05	6.9343e-161	0.285728	0	7.86124e-05
630	0		0	0	[c] : 12dgr18111Z1819Z + ocdcecoa --> tag18111Z1819Z18111Z + coa	Forward only	Glycerolipid metabolism	2.3.1.20	ACOADAGAT18111Z1819Z18111Z	acyl-CoA: diacylglycerol acyltransferase (18:1(11Z))	0	0.0165481	7.00029e-06	3.36302e-06	0	0.0165481	6.73988e-06	0	3.54127e-06	1.70807e-05	1.40886	0	0.0165481	1.70934e-05	0	1.27177e-05	0	1.23036e-06	0	0	0.030199	4.06308e-05	2.46963e-05	0	0.030199	3.7921e-05	0	2.77877e-05	7.26986e-38	1.11658	0	0.0478671	2.25313e-05	0	8.11475e-06	0	0.00475551	0	0
631	0		1	0	[c] : 12dgr18111Z1819Z + ocdce9coa --> tag18111Z1819Z1819Z + coa	Forward only	Glycerolipid metabolism	2.3.1.20	ACOADAGAT18111Z1819Z1819Z	acyl-CoA: diacylglycerol acyltransferase (18:1(9Z))	0	0.0178756	1.91888e-05	9.01613e-06	0	0.0178756	2.61937e-05	1	1.84165e-05	0	0.00110766	0	0.0178756	2.95101e-05	1	1.67728e-05	2.87607e-287	2.08331e-05	1	0	0.0325886	4.6276e-05	2.92537e-05	0	0.0325886	4.89956e-05	0	3.34003e-05	1.24324e-26	1.07277	0	0.0500758	6.31989e-05	0	3.22419e-05	4.55609e-22	0.0145797	0	0
632	1		0	0	[c] : 12dgr18111Z1819Z + pacoa --> tag18111Z1819Z1835Z9Z12Z + coa	Forward only	Glycerolipid metabolism	2.3.1.20	ACOADAGAT18111Z1819Z1835Z9Z12Z	acyl-CoA: diacylglycerol acyltransferase (18:3(5Z,9Z,12Z))	2.39456e-05	0.0165482	3.10954e-05	2.56192e-05	2.39456e-05	0.0165482	2.98212e-05	0	2.57875e-05	5.40393e-11	1.02269	2.39456e-05	0.0165482	3.13886e-05	0	2.56552e-05	0.0435635	1.39362	0	4.31021e-05	0.0301992	5.5328e-05	4.63701e-05	4.31021e-05	0.0301992	5.46039e-05	0	4.65209e-05	0.00601213	1.38189	3.98399e-05	0.0478673	6.44903e-05	0	4.56669e-05	2.81175e-218	0.104806	0	7.9152e-05
633	1		0	0	[c] : 12dgr18111Z1819Z + cacoa --> tag18111Z1819Z1845Z9Z12Z15Z + coa	Forward only	Glycerolipid metabolism	2.3.1.20	ACOADAGAT18111Z1819Z1845Z9Z12Z15Z	acyl-CoA: diacylglycerol acyltransferase (18:4(5Z,9Z,12Z,15Z))	2.40003e-05	0.0165482	3.13811e-05	2.5702e-05	2.40003e-05	0.0165482	3.44769e-05	0	2.67101e-05	2.53889e-146	0.556998	2.40003e-05	0.0165482	3.2352e-05	0	2.57064e-05	0.862415	1.14434	0	4.32006e-05	0.0301993	5.60019e-05	4.65744e-05	4.32006e-05	0.0301993	5.66634e-05	0	4.70731e-05	2.60896e-25	1.37968	3.99309e-05	0.0478674	6.05983e-05	0	4.54946e-05	7.17196e-146	0.664909	0	7.93329e-05
634	0		0	1	[c] : 12dgr1819Z18111Z + pmtcoa --> tag1819Z18111Z160 + coa	Forward only	Glycerolipid metabolism	2.3.1.20	ACOADAGAT1819Z18111Z160	acyl-CoA: diacylglycerol acyltransferase (16:0)	0	0.0195096	6.97483e-05	3.55356e-05	0	0.0195096	6.37856e-05	0	3.50885e-05	0.160743	0.104084	0	0.0195096	7.22842e-05	0	3.48234e-05	0.168097	0.814585	0	0	0.0355298	0.000164191	9.11283e-05	0	0.0355298	0.000115145	-1	6.32916e-05	2.45263e-100	1.13252e-13	0	0.0529786	0.000145376	-1	7.12022e-05	1.05141e-52	0.0195088	1	0
635	1		0	0	[c] : 12dgr1819Z18111Z + ocdccoa --> tag1819Z18111Z180 + coa	Forward only	Glycerolipid metabolism	2.3.1.20	ACOADAGAT1819Z18111Z180	acyl-CoA: diacylglycerol acyltransferase (18:0)	2.37823e-05	0.016548	3.35609e-05	2.54304e-05	2.37823e-05	0.016548	3.46861e-05	0	2.58807e-05	2.49491e-22	1.22119	2.37823e-05	0.016548	3.10553e-05	0	2.54309e-05	5.60832e-29	0.673081	0	4.28082e-05	0.0301989	5.72191e-05	4.61727e-05	4.28082e-05	0.0301989	5.67586e-05	0	4.66521e-05	1.0695e-12	1.42859	3.95683e-05	0.047867	7.31695e-05	0	4.79788e-05	2.0853e-84	0.0416976	0	7.86124e-05
636	0		0	0	[c] : 12dgr1819Z18111Z + ocdcecoa --> tag1819Z18111Z18111Z + coa	Forward only	Glycerolipid metabolism	2.3.1.20	ACOADAGAT1819Z18111Z18111Z	acyl-CoA: diacylglycerol acyltransferase (18:1(11Z))	0	0.0165481	5.67905e-06	3.15105e-06	0	0.0165481	6.8772e-06	0	3.56753e-06	7.00526e-15	0.909177	0	0.0165481	1.75494e-05	0	1.27728e-05	0	1.62872e-11	0	0	0.030199	3.1686e-05	2.39973e-05	0	0.030199	3.38373e-05	0	2.48597e-05	0.000467033	1.11597	0	0.0478671	1.70471e-05	0	7.66143e-06	0	0.00159915	0	0
637	0		1	0	[c] : 12dgr1819Z18111Z + ocdce9coa --> tag1819Z18111Z1819Z + coa	Forward only	Glycerolipid metabolism	2.3.1.20	ACOADAGAT1819Z18111Z1819Z	acyl-CoA: diacylglycerol acyltransferase (18:1(9Z))	0	0.0178756	1.65897e-05	6.3215e-06	0	0.0178756	3.00498e-05	1	1.95413e-05	0	1.03574e-11	0	0.0178756	2.54119e-05	1	1.58559e-05	0	0.000720792	1	0	0.0325886	4.43989e-05	2.9577e-05	0	0.0325886	5.25298e-05	0	3.27694e-05	1.27587e-19	0.166674	0	0.0500758	5.13166e-05	0	2.95087e-05	0.493147	0.36288	0	0
638	1		0	0	[c] : 12dgr1819Z18111Z + pacoa --> tag1819Z18111Z1835Z9Z12Z + coa	Forward only	Glycerolipid metabolism	2.3.1.20	ACOADAGAT1819Z18111Z1835Z9Z12Z	acyl-CoA: diacylglycerol acyltransferase (18:3(5Z,9Z,12Z))	2.39456e-05	0.0165482	3.4277e-05	2.56795e-05	2.39456e-05	0.0165482	3.09414e-05	0	2.59446e-05	9.55958e-16	0.36098	2.39456e-05	0.0165482	3.10072e-05	0	2.56738e-05	7.59084e-25	0.460954	0	4.31021e-05	0.0301992	5.31876e-05	4.63211e-05	4.31021e-05	0.0301992	5.70061e-05	0	4.74533e-05	7.16153e-66	0.526807	3.98399e-05	0.0478673	5.94576e-05	0	4.50594e-05	1.86796e-164	0.395674	0	7.9152e-05
639	1		0	0	[c] : 12dgr1819Z18111Z + cacoa --> tag1819Z18111Z1845Z9Z12Z15Z + coa	Forward only	Glycerolipid metabolism	2.3.1.20	ACOADAGAT1819Z18111Z1845Z9Z12Z15Z	acyl-CoA: diacylglycerol acyltransferase (18:4(5Z,9Z,12Z,15Z))	2.40003e-05	0.0165482	3.27861e-05	2.58079e-05	2.40003e-05	0.0165482	3.38475e-05	0	2.60926e-05	9.1126e-14	1.18529	2.40003e-05	0.0165482	3.02168e-05	0	2.57258e-05	8.63641e-46	0.572236	0	4.32006e-05	0.0301993	5.54555e-05	4.63327e-05	4.32006e-05	0.0301993	5.81697e-05	0	4.72135e-05	2.74341e-45	1.02023	3.99309e-05	0.0478674	6.73532e-05	0	4.57354e-05	3.41427e-200	0.0847029	0	7.93329e-05
640	1		0	0	[c] : 12dgr1819Z1819Z + pmtcoa --> tag1819Z1819Z160 + coa	Forward only	Glycerolipid metabolism	2.3.1.20	ACOADAGAT1819Z1819Z160	acyl-CoA: diacylglycerol acyltransferase (16:0)	0	0.0195096	8.12159e-05	4.61623e-05	0	0.0195096	8.57539e-05	0	4.96258e-05	9.48394e-06	0.518505	0	0.0195096	9.50969e-05	0	5.04512e-05	1.38084e-09	0.0011835	0	0	0.0355298	0.000142634	8.09856e-05	0	0.0355298	0.000157058	0	9.42119e-05	4.55609e-22	0.0971275	0	0.0529786	0.000157074	0	8.66313e-05	3.3317e-05	0.0737533	0	0
641	1		0	0	[c] : 12dgr1819Z1819Z + ocdccoa --> tag1819Z1819Z180 + coa	Forward only	Glycerolipid metabolism	2.3.1.20	ACOADAGAT1819Z1819Z180	acyl-CoA: diacylglycerol acyltransferase (18:0)	2.37823e-05	0.016548	2.80315e-05	2.54543e-05	2.37823e-05	0.016548	2.99052e-05	0	2.5705e-05	2.61934e-43	0.573052	2.37823e-05	0.016548	3.29606e-05	0	2.56345e-05	4.669e-47	0.0529247	0	4.28082e-05	0.0301989	5.49036e-05	4.60317e-05	4.28082e-05	0.0301989	6.04364e-05	0	4.7414e-05	2.14224e-91	0.388528	3.95683e-05	0.047867	6.67408e-05	0	4.60994e-05	1.71675e-170	0.0253298	0	7.86124e-05
642	1		0	0	[c] : 12dgr1819Z1819Z + ocdcecoa --> tag1819Z1819Z18111Z + coa	Forward only	Glycerolipid metabolism	2.3.1.20	ACOADAGAT1819Z1819Z18111Z	acyl-CoA: diacylglycerol acyltransferase (18:1(11Z))	0	0.0165481	2.03238e-05	1.40168e-05	0	0.0165481	2.15519e-05	0	1.43997e-05	6.35557e-06	1.16152	0	0.0165481	2.11753e-05	0	1.38521e-05	0.0109394	1.22457	0	0	0.030199	3.45984e-05	2.42422e-05	0	0.030199	3.14777e-05	0	2.4814e-05	0.0782497	0.867234	0	0.0478671	4.61778e-05	0	2.63948e-05	1.54019e-19	0.103642	0	0
643	1		0	0	[c] : 12dgr1819Z1819Z + ocdce9coa --> tag1819Z1819Z1819Z + coa	Forward only	Glycerolipid metabolism	2.3.1.20	ACOADAGAT1819Z1819Z1819Z	acyl-CoA: diacylglycerol acyltransferase (18:1(9Z))	0	0.0178756	2.57694e-05	1.73803e-05	0	0.0178756	2.70137e-05	0	1.66276e-05	3.3317e-05	1.13072	0	0.0178756	2.72928e-05	0	1.6867e-05	0.0034362	0.914512	0	0	0.0325886	4.94773e-05	2.968e-05	0	0.0325886	5.15134e-05	0	3.35567e-05	2.40272e-26	1.20144	0	0.0500758	5.09807e-05	0	2.83524e-05	0.00103913	1.25957	0	0
644	1		0	0	[c] : 12dgr1819Z1819Z + pacoa --> tag1819Z1819Z1835Z9Z12Z + coa	Forward only	Glycerolipid metabolism	2.3.1.20	ACOADAGAT1819Z1819Z1835Z9Z12Z	acyl-CoA: diacylglycerol acyltransferase (18:3(5Z,9Z,12Z))	2.39456e-05	0.0165482	3.45377e-05	2.66197e-05	2.39456e-05	0.0165482	3.23356e-05	0	2.58536e-05	3.69988e-68	0.773844	2.39456e-05	0.0165482	3.05281e-05	0	2.56284e-05	6.28257e-127	0.160467	0	4.31021e-05	0.0301992	5.38763e-05	4.59337e-05	4.31021e-05	0.0301992	5.52559e-05	0	4.65457e-05	1.5405e-45	1.23188	3.98399e-05	0.0478673	6.13663e-05	0	4.52374e-05	7.80704e-115	0.263372	0	7.9152e-05
645	1		0	0	[c] : 12dgr1819Z1819Z + cacoa --> tag1819Z1819Z1845Z9Z12Z15Z + coa	Forward only	Glycerolipid metabolism	2.3.1.20	ACOADAGAT1819Z1819Z1845Z9Z12Z15Z	acyl-CoA: diacylglycerol acyltransferase (18:4(5Z,9Z,12Z,15Z))	2.40003e-05	0.0165482	3.5338e-05	2.56863e-05	2.40003e-05	0.0165482	3.23744e-05	0	2.60876e-05	3.00007e-39	0.687485	2.40003e-05	0.0165482	3.09948e-05	0	2.58249e-05	1.56357e-58	0.315944	0	4.32006e-05	0.0301993	6.50451e-05	4.83182e-05	4.32006e-05	0.0301993	5.61287e-05	0	4.68175e-05	2.27163e-77	0.208451	3.99309e-05	0.0478674	6.39406e-05	0	4.50461e-05	1.00024e-246	1.32716	0	7.93329e-05
646	0		0	0	[c] : 12dgr16018111Z + amet --> dghs16018111Z + 5mta + h	Forward only	Glycerolipid metabolism		ACPT16018111Z	betaine lipid synthase (3-amino-3-carboxypropyltransferase) (16:0/18:1(11Z))	1.4669e-06	1.4669e-06	1.4669e-06	1.4669e-06	1.4669e-06	1.4669e-06	1.4669e-06	1	1.4669e-06	1.05154e-69	4.64804e-59	1.4669e-06	1.4669e-06	1.4669e-06	-1	1.4669e-06	7.99684e-27	3.4632e-31	1	2.64042e-06	2.64042e-06	2.64042e-06	2.64042e-06	2.64042e-06	2.64042e-06	2.64042e-06	-1	2.64042e-06	0	0	2.44058e-06	2.44058e-06	2.44058e-06	-1	2.44058e-06	0	0	1	4.84883e-06
647	0		0	0	[c] : 12dgr1601819Z + amet --> dghs1601819Z + 5mta + h	Forward only	Glycerolipid metabolism		ACPT1601819Z	betaine lipid synthase (3-amino-3-carboxypropyltransferase) (16:0/18:1(9Z))	0.000136919	0.000136919	0.000136919	0.000136919	0.000136919	0.000136919	0.000136919	-1	0.000136919	3.50791e-80	1.04828e-67	0.000136919	0.000136919	0.000136919	1	0.000136919	3.81222e-237	1.26448e-228	1	0.000246454	0.000246454	0.000246454	0.000246454	0.000246454	0.000246454	0.000246454	-1	0.000246454	2.00714e-31	6.66162e-47	0.000227801	0.000227801	0.000227801	-1	0.000227801	0	0	1	0.000452584
648	0		0	0	[c] : 12dgr18111Z18111Z + amet --> dghs18111Z18111Z + 5mta + h	Forward only	Glycerolipid metabolism		ACPT18111Z18111Z	betaine lipid synthase (3-amino-3-carboxypropyltransferase) (18:1(11Z)/18:1(11Z))	1.41693e-06	1.41693e-06	1.41693e-06	1.41693e-06	1.41693e-06	1.41693e-06	1.41693e-06	1	1.41693e-06	1.0065e-279	1.18379e-262	1.41693e-06	1.41693e-06	1.41693e-06	-1	1.41693e-06	0	0	1	2.55048e-06	2.55048e-06	2.55048e-06	2.55048e-06	2.55048e-06	2.55048e-06	2.55048e-06	-1	2.55048e-06	2.80898e-29	1.59362e-40	2.35745e-06	2.35745e-06	2.35745e-06	-1	2.35745e-06	0	0	1	4.68366e-06
649	0		0	0	[c] : 12dgr18111Z1819Z + amet --> dghs18111Z1819Z + 5mta + h	Forward only	Glycerolipid metabolism		ACPT18111Z1819Z	betaine lipid synthase (3-amino-3-carboxypropyltransferase) (18:1(11Z)/18:1(9Z))	1.80863e-05	1.80863e-05	1.80863e-05	1.80863e-05	1.80863e-05	1.80863e-05	1.80863e-05	1	1.80863e-05	0	0	1.80863e-05	1.80863e-05	1.80863e-05	1	1.80863e-05	0	0	1	3.25554e-05	3.25554e-05	3.25554e-05	3.25554e-05	3.25554e-05	3.25554e-05	3.25554e-05	1	3.25554e-05	1.87457e-96	3.28057e-123	3.00914e-05	3.00914e-05	3.00914e-05	-1	3.00914e-05	0	0	1	5.97843e-05
650	0		0	0	[c] : 12dgr1819Z18111Z + amet --> dghs1819Z18111Z + 5mta + h	Forward only	Glycerolipid metabolism		ACPT1819Z18111Z	betaine lipid synthase (3-amino-3-carboxypropyltransferase) (18:1(9Z)/18:1(11Z))	9.2476e-06	9.2476e-06	9.2476e-06	9.2476e-06	9.2476e-06	9.2476e-06	9.2476e-06	1	9.2476e-06	0	0	9.2476e-06	9.2476e-06	9.2476e-06	1	9.2476e-06	0	0	1	1.66457e-05	1.66457e-05	1.66457e-05	1.66457e-05	1.66457e-05	1.66457e-05	1.66457e-05	-1	1.66457e-05	0	0	1.53859e-05	1.53859e-05	1.53859e-05	-1	1.53859e-05	0	0	1	3.05679e-05
651	0		0	0	[c] : 12dgr1819Z1819Z + amet --> dghs1819Z1819Z + 5mta + h	Forward only	Glycerolipid metabolism		ACPT1819Z1819Z	betaine lipid synthase (3-amino-3-carboxypropyltransferase) (18:1(9Z)/18:1(9Z))	9.42654e-05	9.42654e-05	9.42654e-05	9.42654e-05	9.42654e-05	9.42654e-05	9.42654e-05	-1	9.42654e-05	0	0	9.42654e-05	9.42654e-05	9.42654e-05	-1	9.42654e-05	0	0	1	0.000169678	0.000169678	0.000169678	0.000169678	0.000169678	0.000169678	0.000169678	-1	0.000169678	0	0	0.000156836	0.000156836	0.000156836	-1	0.000156836	0	0	1	0.000311594
652	0		0	0	[h] : 1hdecg3p + octe9ACP --> ACP + pa1601819Z	Forward only	Glycerolipid metabolism	2.3.1.51	AGPAT1601819Zh	1-hexadecanoyl-sn-glycerol 3-phosphate O-acyltransferase ((9Z)-C18:1) (ACP substrate)	0	0	0	0	0	0	0	0	0	1	NaN	0	0	0	0	0	1	NaN	0	0	0	0	0	0	0	0	0	0	1	NaN	0	0	0	0	0	1	NaN	0	0
653	0		0	0	[h] : 1hdecg3p + palmACP --> ACP + pa160	Forward only	Glycerolipid metabolism	2.3.1.51	AGPAT160h	1-hexadecanoyl-sn-glycerol 3-phosphate O-acyltransferase (n-C16:0) (ACP substrate)	4.66124e-05	4.66124e-05	4.66124e-05	4.66124e-05	4.66124e-05	4.66124e-05	4.66124e-05	1	4.66124e-05	1.39763e-206	9.73193e-153	4.66124e-05	4.66124e-05	4.66124e-05	1	4.66124e-05	0	1.53175e-304	1	8.39024e-05	8.39024e-05	8.39024e-05	8.39024e-05	8.39024e-05	8.39024e-05	8.39024e-05	1	8.39024e-05	2.10679e-143	1.15061e-97	7.75522e-05	7.75522e-05	7.75522e-05	-1	7.75522e-05	0	0	1	0.000154077
654	0		0	0	[h] : 1odecg3p + octe9ACP --> ACP + pa1801819Z	Forward only	Glycerolipid metabolism	2.3.1.51	AGPAT1801819Zh	1-octadecanoyl-sn-glycerol 3-phosphate O-acyltransferase ((9Z)-C18:1) (ACP substrate)	0	0	0	0	0	0	0	0	0	1	NaN	0	0	0	0	0	1	NaN	0	0	0	0	0	0	0	0	0	0	1	NaN	0	0	0	0	0	1	NaN	0	0
655	0		0	0	[h] : 1odec11eg3p + palmACP --> ACP + pa18111Z160	Forward only	Glycerolipid metabolism	2.3.1.51	AGPAT18111Z160h	1-octadec-11-enoyl-sn-glycerol 3-phosphate O-acyltransferase (n-C16:0) (ACP substrate)	7.45589e-05	7.45589e-05	7.45589e-05	7.45589e-05	7.45589e-05	7.45589e-05	7.45589e-05	1	7.45589e-05	6.88679e-55	2.63549e-27	7.45589e-05	7.45589e-05	7.45589e-05	-1	7.45589e-05	0	0	1	0.000134206	0.000134206	0.000134206	0.000134206	0.000134206	0.000134206	0.000134206	-1	0.000134206	6.67257e-269	2.61063e-229	0.000124049	0.000124049	0.000124049	-1	0.000124049	0	0	1	0.000246454
656	0		0	0	[h] : 1odec11eg3p + octe9ACP --> ACP + pa18111Z1819Z	Forward only	Glycerolipid metabolism	2.3.1.51	AGPAT18111Z1819Zh	1-octadec-11-enoyl-sn-glycerol 3-phosphate O-acyltransferase ((9Z)-C18:1) (ACP substrate)	0	0	0	0	0	0	0	0	0	1	NaN	0	0	0	0	0	1	NaN	0	0	0	0	0	0	0	0	0	0	1	NaN	0	0	0	0	0	1	NaN	0	0
657	0		0	0	[h] : 1odec9eg3p + palmACP --> ACP + pa1819Z160	Forward only	Glycerolipid metabolism	2.3.1.51	AGPAT1819Z160h	1-octadec-9-enoyl-sn-glycerol 3-phosphateO-acyltransferase (n-C16:0) (ACP substrate)	0.00131225	0.00131225	0.00131225	0.00131225	0.00131225	0.00131225	0.00131225	-1	0.00131225	3.70461e-103	1.15732e-74	0.00131225	0.00131225	0.00131225	1	0.00131225	9.30548e-09	4.41325e-06	1	0.00236205	0.00236205	0.00236205	0.00236205	0.00236205	0.00236205	0.00236205	1	0.00236205	0	0	0.00218328	0.00218328	0.00218328	-1	0.00218328	0	0	1	0.00433763
658	0		1	0	[h] : 1odec9eg3p + hdeACP --> ACP + pa1819Z1619Z	Forward only	Glycerolipid metabolism	2.3.1.51	AGPAT1819Z1619Zh	1-octadec-9-enoyl-sn-glycerol 3-phosphateO-acyltransferase ((9Z)-C16:1) (ACP substrate)	1.5272e-05	1.5272e-05	1.5272e-05	1.5272e-05	1.5272e-05	1.5272e-05	1.5272e-05	1	1.5272e-05	9.24665e-123	2.46147e-78	1.5272e-05	1.5272e-05	1.5272e-05	1	1.5272e-05	0	0	1	2.74896e-05	2.74896e-05	2.74896e-05	2.74896e-05	2.74896e-05	2.74896e-05	2.74896e-05	0	2.74896e-05	0	1.86388011785900e-311	2.5409e-05	2.5409e-05	2.5409e-05	0	2.5409e-05	0	0	0	5.04814e-05
659	0		0	0	[h] : 1odec9eg3p + octeACP --> ACP + pa1819Z18111Z	Forward only	Glycerolipid metabolism	2.3.1.51	AGPAT1819Z18111Zh	1-octadec-9-enoyl-sn-glycerol 3-phosphateO-acyltransferase ((11Z)-C18:1) (ACP substrate)	0	0	0	0	0	0	0	0	0	1	NaN	0	0	0	0	0	1	NaN	0	0	0	0	0	0	0	0	0	0	1	NaN	0	0	0	0	0	1	NaN	0	0
660	0		0	0	[h] : 1odec9eg3p + octe9ACP --> ACP + pa1819Z1819Z	Forward only	Glycerolipid metabolism	2.3.1.51	AGPAT1819Z1819Zh	1-octadec-9-enoyl-sn-glycerol 3-phosphateO-acyltransferase ((9Z)-C18:1) (ACP substrate)	0	0	0	0	0	0	0	0	0	1	NaN	0	0	0	0	0	1	NaN	0	0	0	0	0	0	0	0	0	0	1	NaN	0	0	0	0	0	1	NaN	0	0
661	1		0	0	[c] : 1hdecg3p + ocdcecoa --> coa + pa16018111Z	Forward only	Glycerolipid metabolism	2.3.1.51	AGPATCOA16018111Z	1-hexadecanoyl-sn-glycerol 3-phosphate O-acyltransferase ((11Z)-C18:1) (CoA substrate)	0.000149817	0.0168423	0.000294288	0.00025995	0.000149817	0.0168423	0.000284994	0	0.000255674	1.79016e-09	0.33816	0.000149817	0.0168423	0.000224992	0	0.00019637	0	1.03387e-31	0	0.000269671	0.0307286	0.000387941	0.000349899	0.000269671	0.0307286	0.000394549	0	0.000355129	1.94617e-08	0.86401	0.000249261	0.0483567	0.000585423	0	0.000463897	0	4.56705e-42	0	0.000495221
662	1		0	0	[c] : 1hdecg3p + ocdce9coa --> coa + pa1601819Z	Forward only	Glycerolipid metabolism	2.3.1.51	AGPATCOA1601819Z	1-hexadecanoyl-sn-glycerol 3-phosphate O-acyltransferase ((9Z)-C18:1) (CoA substrate)	0.000285269	0.0183053	0.000647414	0.000590849	0.000285269	0.0183053	0.000637913	0	0.000586047	0.0245213	0.359326	0.000285269	0.0183053	0.000517242	0	0.000451717	4.06701e-263	8.63485e-100	0	0.000513485	0.033362	0.00100321	0.000866306	0.000513485	0.033362	0.000980641	0	0.000854645	0.010252	0.127642	0.000474621	0.0507907	0.000938749	0	0.000800121	7.37541e-82	1.07587e-05	0	0.000942956
663	0		1	0	[c] : 1odecg3p + ocdce9coa --> coa + pa1801819Z	Forward only	Glycerolipid metabolism	2.3.1.51	AGPATCOA1801819Z	1-octadecanoyl-sn-glycerol 3-phosphate O-acyltransferase ((9Z)-C18:1) (CoA substrate)	0.000200797	0.0182208	0.000498365	0.000419385	0.000200797	0.0182208	0.00043409	-1	0.00036874	2.59175e-130	1.70942e-19	0.000200797	0.0182208	0.000420482	-1	0.000350629	1.96623e-237	3.95822e-28	1	0.000361435	0.0332099	0.000756848	0.000632712	0.000361435	0.0332099	0.000778625	0	0.00065393	2.17968e-14	0.14813	0.00033408	0.0506502	0.000764449	0	0.000637782	9.16049e-08	0.887986	0	0.000663734
664	0		0	1	[c] : 1odec11eg3p + pmtcoa --> coa + pa18111Z160	Forward only	Glycerolipid metabolism	2.3.1.51	AGPATCOA18111Z160	1-octadec-11-enoyl-sn-glycerol 3-phosphate O-acyltransferase (n-C16:0) (CoA substrate)	3.65876e-05	0.019695	0.000766024	0.000646057	3.65876e-05	0.019695	0.000773907	0	0.000642641	0.0670209	0.867191	3.65876e-05	0.019695	0.000832321	0	0.000693377	1.38084e-09	1.54939e-10	0	6.58576e-05	0.0358636	0.00127698	0.00101197	6.58576e-05	0.0358636	0.00134618	1	0.00109574	6.69246e-39	0.000356786	6.08732e-05	0.0532871	0.00148097	1	0.00121927	9.1858e-52	5.76954e-21	1	0.00012094
665	1		0	0	[c] : 1odec11eg3p + ocdcecoa --> coa + pa18111Z18111Z	Forward only	Glycerolipid metabolism	2.3.1.51	AGPATCOA18111Z18111Z	1-octadec-11-enoyl-sn-glycerol 3-phosphate O-acyltransferase ((11Z)-C18:1) (CoA substrate)	0.000145377	0.0168378	0.000214422	0.000189244	0.000145377	0.0168378	0.000210497	0	0.000186668	1.94617e-08	0.891859	0.000145377	0.0168378	0.000218689	0	0.000192547	1.63314e-10	0.742852	0	0.000261679	0.0307207	0.000382383	0.0003425	0.000261679	0.0307207	0.000403821	0	0.000352798	1.4338e-24	0.0542662	0.000241873	0.0483493	0.000385992	0	0.000330847	1.99834e-71	1.13785	0	0.000480543
666	1		0	0	[c] : 1odec11eg3p + ocdce9coa --> coa + pa18111Z1819Z	Forward only	Glycerolipid metabolism	2.3.1.51	AGPATCOA18111Z1819Z	1-octadec-11-enoyl-sn-glycerol 3-phosphate O-acyltransferase ((9Z)-C18:1) (CoA substrate)	0.000223701	0.0182437	0.000442339	0.000379212	0.000223701	0.0182437	0.000451455	0	0.000385743	1.45539e-07	0.331318	0.000223701	0.0182437	0.000444613	0	0.000377613	0.524911	1.17435	0	0.000402662	0.0332512	0.000813851	0.000689836	0.000402662	0.0332512	0.000808099	0	0.000692358	0.00206222	1.08092	0.000372186	0.0506883	0.00080045	0	0.000662472	1.26879e-34	0.545128	0	0.000739443
667	0		1	0	[c] : 1odec9eg3p + pmtcoa --> coa + pa1819Z160	Forward only	Glycerolipid metabolism	2.3.1.51	AGPATCOA1819Z160	1-octadec-9-enoyl-sn-glycerol 3-phosphateO-acyltransferase (n-C16:0) (CoA substrate)	4.92525e-06	0.0196634	0.00065941	0.000540791	4.92525e-06	0.0196634	0.000688357	1	0.000564901	3.10616e-06	0.00876492	4.92525e-06	0.0196634	0.00073781	1	0.00060422	7.78597e-14	4.75068e-15	1	8.86545e-06	0.0358066	0.00123055	0.000969229	8.86545e-06	0.0358066	0.00123771	0	0.000972683	0.0460384	1.19103	8.19447e-06	0.0532344	0.00127891	0	0.00104955	4.50213e-07	0.0173046	0	1.62804e-05
668	1		0	0	[c] : 1odec9eg3p + ocdcecoa --> coa + pa1819Z18111Z	Forward only	Glycerolipid metabolism	2.3.1.51	AGPATCOA1819Z18111Z	1-octadec-9-enoyl-sn-glycerol 3-phosphateO-acyltransferase ((11Z)-C18:1) (CoA substrate)	0.000153208	0.0168457	0.000222556	0.00019459	0.000153208	0.0168457	0.000210036	0	0.000193172	6.44599e-08	0.0391609	0.000153208	0.0168457	0.000216039	0	0.000195986	0.00030842	0.431056	0	0.000275774	0.0307347	0.000388232	0.000348972	0.000275774	0.0307347	0.000401369	0	0.000358364	1.34706e-27	0.365942	0.000254902	0.0483623	0.000403715	0	0.000343707	3.45958e-34	0.295903	0	0.000506427
669	1		0	0	[c] : 1odec9eg3p + ocdce9coa --> coa + pa1819Z1819Z	Forward only	Glycerolipid metabolism	2.3.1.51	AGPATCOA1819Z1819Z	1-octadec-9-enoyl-sn-glycerol 3-phosphateO-acyltransferase ((9Z)-C18:1) (CoA substrate)	0.00024384	0.0182638	0.000467136	0.000405309	0.00024384	0.0182638	0.000481098	0	0.000413215	1.70807e-05	0.0656768	0.00024384	0.0182638	0.000457478	0	0.000392495	1.38084e-09	0.190327	0	0.000438912	0.0332874	0.000859046	0.00074112	0.000438912	0.0332874	0.000844859	0	0.000737945	0.00239091	0.346755	0.000405693	0.0507218	0.000853261	0	0.000712085	1.24324e-26	1.05716	0	0.000806013
670	0		0	0	[c] : asqdca1819Z160 + o2 + (2) nadh --> asqdca1829Z12Z160 + (2) h2o + (2) nad	Forward only	Glycerolipid metabolism	1.14.19.-	ASQDCADS1829Z12Z160	oleate desaturase (2'-18:4(5Z,9Z,12Z,15Z)/18:2(9Z,12Z)/16:0)	4.53027e-05	4.53027e-05	4.53027e-05	4.53027e-05	4.53027e-05	4.53027e-05	4.53027e-05	-1	4.53027e-05	0	0	4.53027e-05	4.53027e-05	4.53027e-05	1	4.53027e-05	0	0	1	8.15448e-05	8.15448e-05	8.15448e-05	8.15448e-05	8.15448e-05	8.15448e-05	8.15448e-05	1	8.15448e-05	0	0	7.53731e-05	7.53731e-05	7.53731e-05	-1	7.53731e-05	0	0	1	0.000149748
671	0		0	0	[c] : asqdca1829Z12Z160 + o2 + (2) nadh --> asqdca1839Z12Z15Z160 + (2) h2o + (2) nad	Forward only	Glycerolipid metabolism	1.14.19.-	ASQDCADS1839Z12Z15Z160	linoleate desaturase (2'-18:4(5Z,9Z,12Z,15Z)/18:3(9Z,12Z,15Z)/16:0)	2.26726e-05	2.26726e-05	2.26726e-05	2.26726e-05	2.26726e-05	2.26726e-05	2.26726e-05	1	2.26726e-05	0	0	2.26726e-05	2.26726e-05	2.26726e-05	1	2.26726e-05	0	0	1	4.08107e-05	4.08107e-05	4.08107e-05	4.08107e-05	4.08107e-05	4.08107e-05	4.08107e-05	1	4.08107e-05	0	0	3.77219e-05	3.77219e-05	3.77219e-05	-1	3.77219e-05	0	0	1	7.49442e-05
672	0		0	0	[c] : asqdpa1819Z160 + o2 + (2) nadh --> asqdpa1829Z12Z160 + (2) h2o + (2) nad	Forward only	Glycerolipid metabolism	1.14.19.-	ASQDPADS1829Z12Z160	oleate desaturase (2'-18:3(5Z,9Z,12Z)/18:2(9Z,12Z)/16:0)	4.52182e-05	4.52182e-05	4.52182e-05	4.52182e-05	4.52182e-05	4.52182e-05	4.52182e-05	1	4.52182e-05	3.90929e-166	1.19779e-215	4.52182e-05	4.52182e-05	4.52182e-05	-1	4.52182e-05	1.18328e-137	1.25297e-193	1	8.13927e-05	8.13927e-05	8.13927e-05	8.13927e-05	8.13927e-05	8.13927e-05	8.13927e-05	1	8.13927e-05	1.68698e-163	5.49479e-243	7.52325e-05	7.52325e-05	7.52325e-05	-1	7.52325e-05	0	0	1	0.000149468
673	0		0	0	[c] : asqdpa1829Z12Z160 + o2 + (2) nadh --> asqdpa1839Z12Z15Z160 + (2) h2o + (2) nad	Forward only	Glycerolipid metabolism	1.14.19.-	ASQDPADS1839Z12Z15Z160	linoleate desaturase (2'-18:3(5Z,9Z,12Z)/18:3(9Z,12Z,15Z)/16:0)	2.26303e-05	2.26303e-05	2.26303e-05	2.26303e-05	2.26303e-05	2.26303e-05	2.26303e-05	1	2.26303e-05	6.60918e-50	1.73386e-43	2.26303e-05	2.26303e-05	2.26303e-05	1	2.26303e-05	2.15928e-35	6.00454e-13	1	4.07345e-05	4.07345e-05	4.07345e-05	4.07345e-05	4.07345e-05	4.07345e-05	4.07345e-05	1	4.07345e-05	1.94413e-85	8.97107e-128	3.76515e-05	3.76515e-05	3.76515e-05	-1	3.76515e-05	0	0	1	7.48043e-05
674	0		0	0	[c] : 12dgr16018111Z + h2o --> mag160 + ocdcea + h	Forward only	Glycerolipid metabolism	3.1.1.3	DAGAH16018111Z	1,2-diacyl-sn-glycerol acylhydrolase (16:0/18:1(11Z))	0	0.00779402	9.86636e-06	2.99424e-06	0	0.00779402	2.32228e-06	0	0	0	3.00937e-11	0	0.00779402	8.14239e-06	0	2.72402e-06	1.94617e-08	0.438671	0	0	0.0141943	1.7053e-05	6.47498e-06	0	0.0141943	1.58675e-05	0	6.10213e-06	3.81886e-06	1.11073	0	0.0226876	5.34208e-05	0	1.60359e-05	0	9.62989e-13	0	0
675	0		0	0	[c] : 12dgr1601819Z + h2o --> mag160 + ocdce9a + h	Forward only	Glycerolipid metabolism	3.1.1.3	DAGAH1601819Z	1,2-diacyl-sn-glycerol acylhydrolase (16:0/18:1(9Z))	0	0.00832503	0.000150988	7.65311e-05	0	0.00832503	0.000127371	-1	2.74704e-05	8.94209e-197	2.79139e-10	0	0.00832503	1.71137e-05	-1	7.30811e-06	0	0	1	0	0.0151501	7.0222e-05	3.59085e-05	0	0.0151501	8.53119e-05	1	4.65521e-05	8.94301e-50	1.04935e-05	0	0.0234238	3.57219e-05	-1	1.47406e-05	0	9.67491e-32	1	0
676	0		0	0	[c] : 12dgr1801819Z + h2o --> mag180 + ocdce9a + h	Forward only	Glycerolipid metabolism	3.1.1.3	DAGAH1801819Z	1,2-diacyl-sn-glycerol acylhydrolase (18:0/18:1(9Z))	0	0.0071407	5.76419e-06	1.28208e-06	0	0.0071407	1.29961e-05	0	4.57119e-06	0	9.17062e-06	0	0.0071407	5.74399e-06	0	1.21594e-06	0.0865876	1.49708	0	0	0.0130183	8.99159e-06	2.19071e-06	0	0.0130183	7.86539e-06	0	2.3046e-06	1.24163e-10	1.12129	0	0.0214441	1.19337e-05	0	3.79313e-06	2.27542e-275	0.45523	0	0
677	0		0	0	[c] : 12dgr18111Z18111Z + h2o --> mag18111Z + ocdcea + h	Forward only	Glycerolipid metabolism	3.1.1.3	DAGAH18111Z18111Z	1,2-diacyl-sn-glycerol acylhydrolase (18:1(11Z)/18:1(11Z))	0	0.00660969	1.35557e-05	4.34009e-06	0	0.00660969	2.79929e-07	0	0	0	1.25091e-29	0	0.00660969	1.02324e-05	0	3.43864e-06	3.50186e-37	0.0833129	0	0	0.0120625	2.07357e-05	7.68488e-06	0	0.0120625	2.39413e-05	0	8.61207e-06	2.14466e-10	0.573731	0	0.0204975	7.20939e-06	0	1.18427e-06	0	1.9224e-07	0	0
678	0		0	0	[c] : 12dgr18111Z1819Z + h2o --> mag18111Z + ocdce9a + h	Forward only	Glycerolipid metabolism	3.1.1.3	DAGAH18111Z1819Z	1,2-diacyl-sn-glycerol acylhydrolase (18:1(11Z)/18:1(9Z))	0	0.0071407	1.33131e-06	0	0	0.0071407	5.6119e-06	1	1.42217e-06	0	2.7502e-05	0	0.0071407	3.18714e-06	1	0	4.79695e-44	0.0147735	1	0	0.0130183	4.12597e-06	1.16841e-06	0	0.0130183	5.72416e-06	0	1.31849e-06	1.24324e-26	0.62812	0	0.0214441	1.30415e-05	0	3.6742e-06	0	0.00215834	0	0
679	0		0	0	[c] : 12dgr1819Z18111Z + h2o --> mag1819Z + ocdcea + h	Forward only	Glycerolipid metabolism	3.1.1.3	DAGAH1819Z18111Z	1,2-diacyl-sn-glycerol acylhydrolase (18:1(9Z)/18:1(11Z))	0	0.0071407	4.61666e-06	1.15576e-06	0	0.0071407	1.1658e-06	0	0	5.28587e-286	0.000531163	0	0.0071407	4.4355e-06	0	1.05998e-06	7.02869e-06	1.38268	0	0	0.0130183	3.86298e-06	0	0	0.0130183	8.55751e-06	0	2.3728e-06	0	0.0440683	0	0.0214441	5.4774e-06	0	1.21138e-06	1.10221e-90	0.621864	0	0
680	0		0	0	[c] : 12dgr1819Z1819Z + h2o --> mag1819Z + ocdce9a + h	Forward only	Glycerolipid metabolism	3.1.1.3	DAGAH1819Z1819Z	1,2-diacyl-sn-glycerol acylhydrolase (18:1(9Z)/18:1(9Z))	0	0.0071407	9.18363e-06	3.82924e-06	0	0.0071407	1.13223e-05	0	4.85301e-06	3.71664e-32	0.110885	0	0.0071407	3.50151e-06	0	1.35644e-06	0	4.68395e-13	0	0	0.0130183	1.84827e-05	8.38777e-06	0	0.0130183	1.73801e-05	0	7.59642e-06	5.19027e-06	0.959701	0	0.0214441	2.17729e-05	0	6.4745e-06	3.71664e-32	0.456291	0	0
681	0		0	0	[c] : atp + 12dgr16018111Z --> adp + pa16018111Z + h	Forward only	Glycerolipid metabolism	2.7.1.107	DAGK16018111Z	diacylglycerol kinase (16:0/18:1(11Z))	0	0.0330484	1.98191e-05	3.63799e-06	0	0.0330484	1.48699e-05	0	3.69871e-06	0.00131057	0.601416	0	0.0330484	1.1186e-05	0	3.2858e-06	8.94824e-69	0.172048	0	0	0.0603123	2.97673e-05	7.22589e-06	0	0.0603123	2.74539e-05	0	7.94096e-06	3.15732e-08	1.32285	0	0.0956549	5.41174e-05	0	1.16429e-05	3.70461e-103	0.075619	0	0
682	0		0	0	[c] : atp + 12dgr1601819Z --> adp + pa1601819Z + h	Forward only	Glycerolipid metabolism	2.7.1.107	DAGK1601819Z	diacylglycerol kinase (16:0/18:1(9Z))	0	0.0330484	1.46999e-05	3.32636e-06	0	0.0330484	1.97224e-05	0	4.32063e-06	3.5852e-70	0.588637	0	0.0330484	1.43195e-05	0	3.53645e-06	1.38084e-09	1.43525	0	0	0.0603123	2.8755e-05	6.7547e-06	0	0.0603123	3.55524e-05	0	9.00057e-06	1.12296e-43	0.940191	0	0.0956549	5.51287e-05	0	1.28738e-05	2.00294e-185	0.0511147	0	0
683	0		0	1	[h] : atp + 12dgr1601819Z --> adp + pa1601819Z + h	Forward only	Glycerolipid metabolism	2.7.1.107	DAGK1601819Zh	diacylglycerol kinase (16:0/18:1(9Z)), chloroplast	0	6.64681	0.0118308	0.00428675	0	6.64681	0.0124635	0	0.00532959	7.67958e-24	1.10401	0	0.475542	0.000578599	0	0.000176561	0	5.06524e-42	0	0	7.99392	0.0110986	0.00445295	0	7.99392	0.0165693	1	0.00676344	1.1984e-86	0.00209706	0	0.0956549	7.43645e-05	-1	1.80539e-05	0	8.52562e-32	1	0
684	0		1	0	[h] : 12dgr160 + atp --> adp + h + pa160	Forward only	Glycerolipid metabolism	2.7.1.107	DAGK160h	diacylglycerol kinase (n-C16:0)	0	6.64681	0.00945174	0.00394859	0	6.64681	0.0159058	1	0.00726672	7.0806e-180	4.58981e-08	0	0.475542	0.00071335	-1	0.000223392	0	7.99302e-32	1	0	7.99392	0.0132634	0.00493899	0	7.99392	0.0104281	0	0.00465611	3.3317e-05	0.0736743	0	0.0956549	4.86233e-05	0	1.17669e-05	0	1.83093e-43	0	0
685	0		0	0	[c] : atp + 12dgr1801819Z --> adp + pa1801819Z + h	Forward only	Glycerolipid metabolism	2.7.1.107	DAGK1801819Z	diacylglycerol kinase (18:0/18:1(9Z))	0	0.0330484	1.808e-05	3.3206e-06	0	0.0330484	1.77027e-05	0	4.14075e-06	2.03951e-22	1.47899	0	0.0330484	1.33865e-05	0	3.27113e-06	1.36128e-22	0.606184	0	0	0.0603123	2.5159e-05	6.46451e-06	0	0.0603123	4.53254e-05	0	9.60983e-06	1.20007e-92	0.0979789	0	0.0956549	4.82308e-05	0	1.12263e-05	2.60115e-202	0.0857652	0	0
686	1	0	0	0	[h] : atp + 12dgr1801819Z --> adp + pa1801819Z + h	Forward only	Glycerolipid metabolism	2.7.1.107	DAGK1801819Zh	diacylglycerol kinase (18:0/18:1(9Z)), chloroplast	0	6.64681	0.0146518	0.00558086	0	6.64681	0.012183	0	0.00541045	0.508922	0.19117	0	0.475542	0.000450855	0	0.000138273	0	7.20632e-40	0	0	7.99392	0.010861	0.00414473	0	7.99392	0.0130996	0	0.00483678	6.79275e-13	0.404762	0	0.0956549	4.11108e-05	0	1.37534e-05	0	1.22872e-29	0	0
687	0		0	0	[c] : atp + 12dgr18111Z18111Z --> adp + pa18111Z18111Z + h	Forward only	Glycerolipid metabolism	2.7.1.107	DAGK181	diacylglycerol kinase (18:1(11Z)/18:1(11Z))	0	0.0330484	1.35603e-05	3.18982e-06	0	0.0330484	1.88072e-05	0	4.03502e-06	2.05619e-45	0.642594	0	0.0330484	1.19462e-05	0	3.45429e-06	2.77579e-28	1.19702	0	0	0.0603123	2.86333e-05	6.70369e-06	0	0.0603123	3.00853e-05	0	8.01798e-06	1.36128e-22	1.37968	0	0.0956549	4.00538e-05	0	1.06742e-05	9.84107e-143	0.345615	0	0
688	1		0	0	[h] : atp + 12dgr18111Z160 --> adp + pa18111Z160 + h	Forward only	Glycerolipid metabolism	2.7.1.107	DAGK18111Z160h	diacylglycerol kinase (18:1(11Z)/16:0)	0	6.64681	0.013673	0.00504975	0	6.64681	0.0129439	0	0.00533469	0.000283516	1.08717	0	0.475542	0.000736007	0	0.000225305	0	1.8735e-38	0	0	7.99392	0.0138911	0.0057748	0	7.99392	0.0127917	0	0.00563487	0.691741	0.913525	0	0.0956549	7.43601e-05	0	1.41397e-05	0	4.19705e-35	0	0
689	0		0	0	[c] : atp + 12dgr18111Z1819Z --> adp + pa18111Z1819Z + h	Forward only	Glycerolipid metabolism	2.7.1.107	DAGK18111Z1819Z	diacylglycerol kinase (18:1(11Z)/18:1(9Z))	0	0.0330484	1.26996e-05	3.20069e-06	0	0.0330484	1.48658e-05	0	3.79683e-06	7.6753e-32	1.1505	0	0.0330484	1.46107e-05	0	3.48358e-06	2.63454e-09	1.14117	0	0	0.0603123	2.50975e-05	6.58082e-06	0	0.0603123	2.11771e-05	0	7.22734e-06	7.25318e-09	1.09117	0	0.0956549	4.09699e-05	0	9.83286e-06	8.00893e-135	0.273644	0	0
690	1		0	0	[h] : atp + 12dgr18111Z1819Z --> adp + pa18111Z1819Z + h	Forward only	Glycerolipid metabolism	2.7.1.107	DAGK18111Z1819Zh	diacylglycerol kinase (18:1(11Z)/18:1(9Z)), chloroplast	0	6.64681	0.0119514	0.00470504	0	6.64681	0.0117442	0	0.00422734	1.19193e-08	1.40461	0	0.475542	0.000598371	0	0.000172641	0	2.1673e-41	0	0	7.99392	0.0135855	0.00537542	0	7.99392	0.0129999	0	0.00563178	0.0150422	1.18328	0	0.0956549	4.72883e-05	0	1.22802e-05	0	2.53072e-43	0	0
691	1		0	0	[h] : atp + 12dgr1819Z160 --> adp + pa1819Z160 + h	Forward only	Glycerolipid metabolism	2.7.1.107	DAGK1819Z160h	diacylglycerol kinase (18:1(9Z)/16:0)	0	6.64681	0.0145041	0.00550609	0	6.64681	0.0137777	0	0.00536093	0.432471	1.08452	0	0.475542	0.000342839	0	0.0001177	0	6.24933e-54	0	0	7.99392	0.0140435	0.0054613	0	7.99392	0.0137399	0	0.00541214	0.773915	1.37968	0	0.0956549	5.24534e-05	0	1.0774e-05	0	1.01847e-44	0	0
692	0		0	1	[h] : atp + 12dgr1819Z1619Z --> adp + pa1819Z1619Z + h	Forward only	Glycerolipid metabolism	2.7.1.107	DAGK1819Z1619Zh	diacylglycerol kinase (18:1(9Z)/16:1(9Z))	0	6.64681	0.00994424	0.00377127	0	6.64681	0.0119994	0	0.00432538	6.21384e-11	0.304779	0	0.475542	0.00035007	0	0.000104403	0	7.25326e-31	0	0	7.99392	0.0105938	0.00398219	0	7.99392	0.0207574	1	0.00779998	2.17215e-176	7.5121e-08	0	0.0956549	7.81975e-05	-1	1.62991e-05	0	2.43763e-43	1	0
693	0		0	0	[c] : atp + 12dgr1819Z18111Z --> adp + pa1819Z18111Z + h	Forward only	Glycerolipid metabolism	2.7.1.107	DAGK1819Z18111Z	diacylglycerol kinase (18:1(9Z)/18:1(11Z))	0	0.0330484	1.65846e-05	3.49947e-06	0	0.0330484	1.56271e-05	0	3.58461e-06	2.07148e-05	1.38482	0	0.0330484	1.72066e-05	0	3.35572e-06	0.000130509	1.393	0	0	0.0603123	2.48875e-05	6.30294e-06	0	0.0603123	3.26799e-05	0	8.16104e-06	1.61473e-53	0.790474	0	0.0956549	2.88729e-05	0	1.06307e-05	8.35196e-290	1.0317	0	0
694	0		1	0	[h] : atp + 12dgr1819Z18111Z --> adp + pa1819Z18111Z + h	Forward only	Glycerolipid metabolism	2.7.1.107	DAGK1819Z18111Zh	diacylglycerol kinase (18:1(9Z)/18:1(11Z)), chloroplast	0	6.64681	0.0130892	0.0046952	0	6.64681	0.0170622	1	0.00654512	1.5405e-45	0.0333571	0	0.475542	0.000562105	-1	0.000173612	0	2.42053e-40	1	0	7.99392	0.0116149	0.00460086	0	7.99392	0.014379	0	0.00640237	1.1199e-59	0.146711	0	0.0956549	3.76382e-05	0	1.29184e-05	0	1.24199e-32	0	0
695	0		0	0	[c] : atp + 12dgr1819Z1819Z --> adp + pa1819Z1819Z + h	Forward only	Glycerolipid metabolism	2.7.1.107	DAGK1819Z1819Z	diacylglycerol kinase (18:1(9Z)/18:1(9Z))	0	0.0330484	1.59318e-05	3.433e-06	0	0.0330484	1.35514e-05	0	3.87992e-06	4.44115e-34	1.11249	0	0.0330484	1.58961e-05	0	3.23241e-06	0.000960997	1.49824	0	0	0.0603123	2.70436e-05	6.4798e-06	0	0.0603123	2.64889e-05	0	7.46409e-06	2.23022e-21	1.45714	0	0.0956549	7.67467e-05	0	1.49265e-05	5.39393e-258	0.00203671	0	0
696	1		0	0	[h] : atp + 12dgr1819Z1819Z --> adp + pa1819Z1819Z + h	Forward only	Glycerolipid metabolism	2.7.1.107	DAGK1819Z1819Zh	diacylglycerol kinase (18:1(9Z)/18:1(9Z)), chloroplast	0	6.64681	0.0123085	0.00437889	0	6.64681	0.0146075	0	0.0063734	6.38484e-64	0.231279	0	0.475542	0.000725058	0	0.000189746	0	2.5793e-33	0	0	7.99392	0.0133645	0.00533556	0	7.99392	0.0150548	0	0.00682694	2.69387e-34	0.587032	0	0.0956549	5.8209e-05	0	1.48514e-05	0	9.73683e-39	0	0
697	0		1	0	[h] : dgdg1819Z1627Z10Z + fdxox + o2 + (4) nadph --> dgdg1819Z1634Z7Z10Z + fdxrd + (2) h2o + (4) nadp	Forward only	Glycerolipid metabolism		DGDGD4DS1819Z1634Z7Z10Z	digalatcosyldiacylglycerol 16-carbon delta4-desaturase (18:1(9Z)/16:3(4Z,7Z,10Z))	3.82597e-06	0.00070177	2.04613e-05	1.32868e-05	3.82597e-06	0.00070177	3.2559e-05	1	2.53687e-05	0	2.07194e-92	3.82597e-06	0.00070177	3.49189e-05	1	2.60814e-05	0	2.81065e-112	1	6.88675e-06	0.00126319	3.91281e-05	2.61534e-05	6.88675e-06	0.00126319	6.00845e-05	0	4.6995e-05	0	2.57515e-75	6.36552e-06	0.00116758	4.00756e-05	0	2.62234e-05	0.590619	0.623083	0	1.26467e-05
698	0		1	0	[h] : dgdg1829Z12Z1627Z10Z + fdxox + o2 + (4) nadph --> dgdg1829Z12Z1634Z7Z10Z + fdxrd + (2) h2o + (4) nadp	Forward only	Glycerolipid metabolism		DGDGD4DS1829Z12Z1634Z7Z10Z	digalatcosyldiacylglycerol 16-carbon delta4-desaturase (18:2(9Z,12Z)/16:3(4Z,7Z,10Z))	0	0.000697944	5.15435e-05	3.78516e-05	0	0.000697944	4.29069e-05	-1	2.99224e-05	4.23094e-130	4.19881e-22	0	0.000697944	4.54248e-05	-1	3.05383e-05	1.93683e-113	7.10081e-11	1	0	0.0012563	7.80305e-05	5.40729e-05	0	0.0012563	7.29855e-05	0	5.19466e-05	0.00736639	0.00562186	0	0.00116122	7.96186e-05	0	5.65466e-05	0.000960997	0.535307	0	0
699	1		0	0	[h] : dgdg1839Z12Z15Z1627Z10Z + fdxox + o2 + (4) nadph --> dgdg1839Z12Z15Z1634Z7Z10Z + fdxrd + (2) h2o + (4) nadp	Forward only	Glycerolipid metabolism		DGDGD4DS1839Z12Z15Z1634Z7Z10Z	digalatcosyldiacylglycerol 16-carbon delta4-desaturase (18:3(9Z,12Z,15Z)/16:3(4Z,7Z,10Z))	0	0.000623318	2.02992e-05	1.25069e-05	0	0.000623318	1.99446e-05	0	1.30305e-05	0.00164696	1.03231	0	0.000623318	2.34745e-05	0	1.47373e-05	2.60896e-25	8.18681e-07	0	0	0.00112197	5.19975e-05	3.63899e-05	0	0.00112197	3.50892e-05	0	2.40876e-05	3.20717e-243	3.07429e-54	0	0.00103706	4.93016e-05	0	3.55954e-05	0.116189	0.0335269	0	0
700	1		0	0	[h] : dgdg1839Z12Z15Z1634Z7Z10Z + fdxox + o2 + (4) nadph --> dgdg1839Z12Z15Z1644Z7Z10Z13Z + fdxrd + (2) h2o + (4) nadp	Forward only	Glycerolipid metabolism		DGDGD4DS1839Z12Z15Z1644Z7Z10Z13Z	digalatcosyldiacylglycerol 16-carbon delta4-desaturase (18:3(9Z,12Z,15Z)/16:4(4Z,7Z,10Z,13Z))	0	0.00054742	2.22827e-05	1.27822e-05	0	0.00054742	2.37013e-05	0	1.46854e-05	1.01127e-21	0.104161	0	0.00054742	2.71304e-05	0	1.63016e-05	1.95705e-52	3.9858e-12	0	0	0.000985356	3.8908e-05	2.1373e-05	0	0.000985356	4.10076e-05	0	2.71321e-05	5.77034e-60	0.222146	0	0.000910779	4.07e-05	0	2.41325e-05	2.24176e-19	0.229475	0	0
701	0		1	0	[h] : dgdg1819Z160 + fdxox + o2 + (4) nadph --> dgdg1819Z1617Z + fdxrd + (2) h2o + (4) nadp	Forward only	Glycerolipid metabolism		DGDGD7DS1819Z1617Z	digalatcosyldiacylglycerol palmitate delta7-desaturase (18:1(9Z)/16:1(7Z))	2.10008e-05	0.000853037	0.000314166	0.000290182	2.10008e-05	0.000853037	0.000292172	-1	0.000267066	3.00007e-39	1.17689e-24	2.10008e-05	0.000853037	0.000307923	-1	0.000283904	3.62985e-15	0.0110152	1	3.78015e-05	0.00153547	0.000973983	0.000989454	3.78015e-05	0.00153547	0.000974969	0	0.000990165	0.376198	1.372	3.49405e-05	0.00141925	0.000512829	0	0.000475954	0	0	0	6.94181e-05
702	1		0	0	[h] : dgdg1829Z12Z160 + fdxox + o2 + (4) nadph --> dgdg1829Z12Z1617Z + fdxrd + (2) h2o + (4) nadp	Forward only	Glycerolipid metabolism		DGDGD7DS1829Z12Z1617Z	digalatcosyldiacylglycerol palmitate delta7-desaturase (18:2(9Z,12Z)/16:1(7Z))	0	0.000832036	8.82779e-05	6.27509e-05	0	0.000832036	9.0054e-05	0	6.59109e-05	6.97922e-05	0.552541	0	0.000832036	0.000101298	0	7.6321e-05	4.36628e-30	5.94683e-17	0	0	0.00149766	0.000176742	0.000126877	0	0.00149766	0.000171602	0	0.00012472	0.110744	0.202761	0	0.00138431	0.000172559	0	0.000129757	0.183603	0.230018	0	0
703	0		1	0	[h] : dgdg1819Z160 + h2o --> mgdg1819Z160 + gal	Forward only	Glycerolipid metabolism	3.2.1.22	DGDGGH1819Z160	digalactosyl-diacylglycerol galactohydrolase (18:1(9Z)/16:0)	0	0.00939695	0.00160294	0.00137038	0	0.00939695	0.00166972	1	0.00145997	3.3317e-05	0.000483454	0	0.00939695	0.00187383	1	0.00167897	2.78421e-35	2.05476e-51	1	0	0.0169833	0.00299632	0.0026043	0	0.0169833	0.00304531	0	0.00261575	0.000596179	0.32085	0	0.0142766	0.00306518	0	0.00273291	2.75826e-05	0.049728	0	0
704	0		0	1	[h] : dgdg1819Z1617Z + h2o --> mgdg1819Z1617Z + gal	Forward only	Glycerolipid metabolism	3.2.1.22	DGDGGH1819Z1617Z	digalactosyl-diacylglycerol galactohydrolase (18:1(9Z)/16:1(7Z))	0	0.00076234	3.73608e-05	2.10391e-05	0	0.00076234	3.54657e-05	0	2.21418e-05	0.0160123	0.153836	0	0.00076234	3.5488e-05	0	2.04022e-05	4.40964e-05	0.146741	0	0	0.00137221	6.90034e-05	4.02993e-05	0	0.00137221	0.000518633	1	0.000485474	0	0	0	0.00126836	6.34589e-05	-1	3.63169e-05	3.04126e-12	0.00371847	1	0
705	0		1	0	[h] : dgdg1819Z1619Z + h2o --> mgdg1819Z1619Z + gal	Forward only	Glycerolipid metabolism	3.2.1.22	DGDGGH1819Z1619Z	digalactosyl-diacylglycerol galactohydrolase (18:1(9Z)/16:1(9Z))	0	0.00939695	0.00406456	0.00419311	0	0.00939695	0.00390399	-1	0.00397411	6.21384e-11	8.99527e-15	0	0.00939695	0.00398984	-1	0.00408664	0.000506834	0.000735625	1	0	0.0169833	0.00666313	0.00681669	0	0.0169833	0.00662556	0	0.00675582	0.227256	0.63709	0	0.0142766	0.00633014	0	0.00638791	1.24321e-12	2.69047e-21	0	0
706	1		0	0	[h] : dgdg1819Z1627Z10Z + h2o --> mgdg1819Z1627Z10Z + gal	Forward only	Glycerolipid metabolism	3.2.1.22	DGDGGH1819Z1627Z10Z	digalactosyl-diacylglycerol galactohydrolase (18:1(9Z)/16:2(7Z,10Z))	0	0.000758508	2.2757e-05	1.21548e-05	0	0.000758508	2.10424e-05	0	1.16732e-05	0.0034362	0.0671982	0	0.000758508	2.49785e-05	0	1.33312e-05	3.22196e-07	0.00995137	0	0	0.00136531	4.13848e-05	2.2241e-05	0	0.00136531	4.37701e-05	0	2.53421e-05	3.16225e-13	0.270692	0	0.00126198	4.53867e-05	0	2.50353e-05	1.57255e-09	0.00757781	0	0
707	0		1	0	[h] : dgdg1819Z1637Z10Z13Z + h2o --> mgdg1819Z1637Z10Z13Z + gal	Forward only	Glycerolipid metabolism	3.2.1.22	DGDGGH1819Z1637Z10Z13Z	digalactosyl-diacylglycerol galactohydrolase (18:1(9Z)/16:3(7Z,10Z,13Z))	0	0.000673605	3.58853e-05	3.08745e-05	0	0.000673605	1.22534e-05	-1	6.48476e-06	0	0	0	0.000673605	1.25982e-05	-1	6.03161e-06	0	0	1	0	0.00121249	2.3111e-05	1.43912e-05	0	0.00121249	2.05985e-05	0	1.1879e-05	3.53849e-29	0.0111129	0	0.00112072	2.18453e-05	0	1.15401e-05	9.4571e-38	0.256121	0	0
708	1		0	0	[h] : dgdg1829Z12Z160 + h2o --> mgdg1829Z12Z160 + gal	Forward only	Glycerolipid metabolism	3.2.1.22	DGDGGH1829Z12Z160	digalactosyl-diacylglycerol galactohydrolase (18:2(9Z,12Z)/16:0)	0	0.000769994	1.91303e-05	1.02134e-05	0	0.000769994	1.81967e-05	0	9.856e-06	0.0389586	0.409327	0	0.000769994	2.10891e-05	0	1.12479e-05	2.81185e-10	0.0142175	0	0	0.00138599	3.92981e-05	2.20253e-05	0	0.00138599	3.39958e-05	0	1.91832e-05	9.55958e-16	0.000218131	0	0.00128109	3.94748e-05	0	2.11196e-05	0.000960997	1.36929	0	0
709	1		0	0	[h] : dgdg1829Z12Z1617Z + h2o --> mgdg1829Z12Z1617Z + gal	Forward only	Glycerolipid metabolism	3.2.1.22	DGDGGH1829Z12Z1617Z	digalactosyl-diacylglycerol galactohydrolase (18:2(9Z,12Z)/16:1(7Z))	0	0.00076234	2.91336e-05	1.6178e-05	0	0.00076234	2.91354e-05	0	1.7356e-05	0.0012135	1.5021	0	0.00076234	3.33613e-05	0	1.90122e-05	1.71667e-18	5.58268e-06	0	0	0.00137221	5.81227e-05	3.23385e-05	0	0.00137221	5.58359e-05	0	3.38681e-05	0.0389586	0.437936	0	0.00126836	5.36687e-05	0	3.12399e-05	0.0109394	0.0108993	0	0
710	0		0	1	[h] : dgdg1829Z12Z1619Z + h2o --> mgdg1829Z12Z1619Z + gal	Forward only	Glycerolipid metabolism	3.2.1.22	DGDGGH1829Z12Z1619Z	digalactosyl-diacylglycerol galactohydrolase (18:2(9Z,12Z)/16:1(9Z))	0	3.83195e-06	3.53048e-07	0	0	3.83195e-06	3.87579e-07	0	0	0.153648	0.0372102	0	3.83195e-06	4.99581e-07	0	0	3.55582e-18	8.12357e-25	0	0	6.89751e-06	1.10434e-06	1.10489e-06	0	6.89751e-06	1.03596e-06	-1	1.05589e-06	0.00488913	0.0117672	0	6.37547e-06	1.16025e-06	1	1.17998e-06	6.97922e-05	0.0291728	1	0
711	0		0	0	[h] : dgdg1829Z12Z1627Z10Z + h2o --> mgdg1829Z12Z1627Z10Z + gal	Forward only	Glycerolipid metabolism	3.2.1.22	DGDGGH1829Z12Z1627Z10Z	digalactosyl-diacylglycerol galactohydrolase (18:2(9Z,12Z)/16:2(7Z,10))	0	0.000758508	3.90767e-05	2.38697e-05	0	0.000758508	4.017e-05	0	2.56102e-05	6.26825e-07	0.602302	0	0.000758508	4.40172e-05	0	2.68641e-05	4.29873e-13	2.08027e-06	0	0	0.00136531	0.000120004	9.72513e-05	0	0.00136531	6.84995e-05	-1	4.34817e-05	0	4.81744e-179	0	0.00126198	7.3734e-05	-1	4.55401e-05	0	5.3037e-141	1	0
712	1		0	0	[h] : dgdg1829Z12Z1634Z7Z10Z + h2o --> mgdg1829Z12Z1634Z7Z10Z + gal	Forward only	Glycerolipid metabolism	3.2.1.22	DGDGGH1829Z12Z1634Z7Z10Z	digalactosyl-diacylglycerol galactohydrolase (18:2(9Z,12Z)/16:3(4Z,7Z,10Z))	0	0.000673605	2.484e-05	1.47772e-05	0	0.000673605	2.56487e-05	0	1.56777e-05	0.00030842	0.578069	0	0.000673605	2.81307e-05	0	1.66845e-05	1.08197e-10	2.5584e-05	0	0	0.00121249	4.52113e-05	2.79997e-05	0	0.00121249	4.42574e-05	0	2.78611e-05	0.010252	0.950593	0	0.00112072	4.44269e-05	0	2.69601e-05	0.020477	0.865257	0	0
713	1		0	0	[h] : dgdg1829Z12Z1637Z10Z13Z + h2o --> mgdg1829Z12Z1637Z10Z13Z + gal	Forward only	Glycerolipid metabolism	3.2.1.22	DGDGGH1829Z12Z1637Z10Z13Z	digalactosyl-diacylglycerol galactohydrolase (18:2(9Z,12Z)/16:3(7Z,10Z,13Z))	0	0.000673605	2.43496e-05	1.40446e-05	0	0.000673605	2.28371e-05	0	1.36518e-05	0.00524008	0.0949233	0	0.000673605	2.69137e-05	0	1.57942e-05	4.20859e-10	0.00118991	0	0	0.00121249	4.337e-05	2.50865e-05	0	0.00121249	4.19604e-05	0	2.59642e-05	0.0034362	0.642213	0	0.00112072	4.35916e-05	0	2.62213e-05	0.0706007	1.32724	0	0
714	1		0	0	[h] : dgdg1839Z12Z15Z160 + h2o --> mgdg1839Z12Z15Z160 + gal	Forward only	Glycerolipid metabolism	3.2.1.22	DGDGGH1839Z12Z15Z160	digalactosyl-diacylglycerol galactohydrolase (18:3(9Z,12Z,15Z)/16:0)	0	3.83195e-06	2.79505e-07	0	0	3.83195e-06	2.51683e-07	0	0	0.116189	0.0593378	0	3.83195e-06	3.18949e-07	0	0	0.0571956	0.00340057	0	0	6.89751e-06	7.71116e-07	0	0	6.89751e-06	8.06556e-07	0	0	0.447251	0.286558	0	6.37547e-06	8.76388e-07	0	0	1.87188e-10	1.35715e-06	0	0
715	0		0	0	[h] : dgdg1839Z12Z15Z1627Z10Z + h2o --> mgdg1839Z12Z15Z1627Z10Z + gal	Forward only	Glycerolipid metabolism	3.2.1.22	DGDGGH1839Z12Z15Z1627Z10Z	digalactosyl-diacylglycerol galactohydrolase (18:3(9Z,12Z,15Z)/16:2(7Z,10))	0	0.000673605	1.60621e-05	8.72868e-06	0	0.000673605	1.91453e-05	1	1.08952e-05	4.73486e-32	2.85367e-06	0	0.000673605	1.85334e-05	1	1.05082e-05	1.29113e-20	6.70605e-05	1	0	0.00121249	0.000432312	0.000409648	0	0.00121249	3.27012e-05	-1	1.97561e-05	0	0	0	0.00112072	3.15432e-05	-1	1.84814e-05	0	0	1	0
716	1		0	0	[h] : dgdg1839Z12Z15Z1634Z7Z10Z + h2o --> mgdg1839Z12Z15Z1634Z7Z10Z + gal	Forward only	Glycerolipid metabolism	3.2.1.22	DGDGGH1839Z12Z15Z1634Z7Z10Z	digalactosyl-diacylglycerol galactohydrolase (18:3(9Z,12Z,15Z)/16:3(4Z,7Z,10Z))	0	0.000604092	2.21332e-05	1.32929e-05	0	0.000604092	2.30186e-05	0	1.47885e-05	1.79016e-09	0.394627	0	0.000604092	2.55151e-05	0	1.56645e-05	5.06026e-24	9.3425e-07	0	0	0.00108737	4.35687e-05	2.65103e-05	0	0.00108737	4.14311e-05	0	2.78411e-05	0.0181221	0.227999	0	0.00100507	4.55448e-05	0	2.89571e-05	4.50213e-07	0.190203	0	0
717	1		0	0	[h] : dgdg1839Z12Z15Z1637Z10Z13Z + h2o --> mgdg1839Z12Z15Z1637Z10Z13Z + gal	Forward only	Glycerolipid metabolism	3.2.1.22	DGDGGH1839Z12Z15Z1637Z10Z13Z	digalactosyl-diacylglycerol galactohydrolase (18:3(9Z,12Z,15Z)/16:3(7Z,10Z,13Z))	0	0.000604092	2.22255e-05	1.30133e-05	0	0.000604092	2.34339e-05	0	1.44551e-05	5.49575e-10	0.190487	0	0.000604092	2.60303e-05	0	1.60585e-05	7.05632e-29	2.94969e-08	0	0	0.00108737	3.99309e-05	2.43845e-05	0	0.00108737	4.24824e-05	0	2.71221e-05	2.03706e-09	0.0999875	0	0.00100507	4.21588e-05	0	2.55081e-05	5.19027e-06	0.0991214	0	0
718	1		0	0	[h] : dgdg1839Z12Z15Z1644Z7Z10Z13Z + h2o --> mgdg1839Z12Z15Z1644Z7Z10Z13Z + gal	Forward only	Glycerolipid metabolism	3.2.1.22	DGDGGH1839Z12Z15Z1644Z7Z10Z13Z	digalactosyl-diacylglycerol galactohydrolase (18:3(9Z,12Z,15Z)/16:4(4Z,7Z,10Z,13Z))	0	0.000542285	3.78252e-05	2.16099e-05	0	0.000542285	3.92594e-05	0	2.41305e-05	1.44455e-12	0.308915	0	0.000542285	4.28512e-05	0	2.64539e-05	4.62677e-26	1.67196e-07	0	0	0.000976112	7.14072e-05	4.28363e-05	0	0.000976112	7.30934e-05	0	4.72061e-05	1.23118e-16	0.706599	0	0.000902235	6.90799e-05	0	4.30804e-05	0.0823298	0.255818	0	0
719	0		1	0	[h] : mgdg1819Z160 + udpgal --> dgdg1819Z160 + udp + h	Forward only	Glycerolipid metabolism	2.4.1.241	DGDGS1819Z160	digalactosyldiacylglycerol synthase (18:1(9Z)/16:0)	0.000232933	0.00962988	0.00216742	0.00191916	0.000232933	0.00962988	0.00221303	1	0.00199603	0.0124407	0.0449731	0.000232933	0.00962988	0.0024471	1	0.00225892	1.40534e-32	1.04002e-48	1	0.000419279	0.0174025	0.0044435	0.00404881	0.000419279	0.0174025	0.00448309	0	0.00406712	0.00488913	0.519112	0.000387546	0.0146641	0.0040279	0	0.00368632	3.6369e-52	1.64133e-38	0	0.000769957
720	0		1	0	[h] : mgdg1819Z1619Z + udpgal --> dgdg1819Z1619Z + udp + h	Forward only	Glycerolipid metabolism	2.4.1.241	DGDGS1819Z1619Z	digalactosyldiacylglycerol synthase (18:1(9Z)/16:1(9Z))	1.144e-05	0.00940839	0.00407675	0.00420518	1.144e-05	0.00940839	0.00391622	-1	0.00398602	5.40393e-11	9.06438e-15	1.144e-05	0.00940839	0.00400216	-1	0.00409932	0.000549805	0.000752274	1	2.05921e-05	0.0170039	0.00668513	0.00683893	2.05921e-05	0.0170039	0.00664752	0	0.00677943	0.227256	0.636277	1.90335e-05	0.0142956	0.00635061	0	0.00640794	1.0695e-12	1.75434e-21	0	3.7815e-05
721	0		1	0	[h] : dgdg1819Z1627Z10Z + fdxox + o2 + (4) nadph --> dgdg1819Z1637Z10Z13Z + fdxrd + (2) h2o + (4) nadp	Forward only	Glycerolipid metabolism		DGDGW3DS1819Z1637Z10Z13Z	omega-3 desaturase (18:1(9Z)/16:3(7Z,10Z,13Z)) (DGDG)	3.82597e-06	0.00070177	6.4523e-05	5.60363e-05	3.82597e-06	0.00070177	3.70335e-05	-1	2.5808e-05	0	1.43026e-251	3.82597e-06	0.00070177	3.62524e-05	-1	2.34638e-05	0	6.71026e-252	1	6.88675e-06	0.00126319	5.94116e-05	4.19935e-05	6.88675e-06	0.00126319	6.31328e-05	0	4.50982e-05	5.67714e-14	0.0183505	6.36552e-06	0.00116758	5.75814e-05	0	3.84018e-05	1.42951e-18	0.282598	0	1.26467e-05
722	0		0	1	[h] : dgdg1829Z12Z1627Z10Z + fdxox + o2 + (4) nadph --> dgdg1829Z12Z1637Z10Z13Z + fdxrd + (2) h2o + (4) nadp	Forward only	Glycerolipid metabolism		DGDGW3DS1829Z12Z1637Z10Z13Z	omega-3 desaturase (18:2(9Z,12Z)/16:3(7Z,10Z,13Z)) (DGDG)	0	0.000697944	3.99383e-05	2.61266e-05	0	0.000697944	3.89959e-05	0	2.62798e-05	0.541095	0.62667	0	0.000697944	4.98033e-05	0	3.55723e-05	6.11327e-160	1.09913e-28	0	0	0.0012563	7.74406e-05	5.26587e-05	0	0.0012563	7.34545e-05	-1	5.09428e-05	0.00524008	0.0498599	0	0.00116122	8.65575e-05	1	6.2032e-05	1.33553e-48	3.50975e-08	1	0
723	0		0	1	[h] : dgdg1829Z12Z160 + fdxox + o2 + (4) nadph --> dgdg1839Z12Z15Z160 + fdxrd + (2) h2o + (4) nadp	Forward only	Glycerolipid metabolism		DGDGW3DS1839Z12Z15Z160	omega-3 desaturase (18:3(9Z,12Z,15Z)/16:0) (DGDG)	4.58103e-05	4.96423e-05	4.64639e-05	4.63219e-05	4.58103e-05	4.96423e-05	4.64487e-05	0	4.63015e-05	0.000820928	0.255411	4.58103e-05	4.96423e-05	4.65178e-05	0	4.63652e-05	5.40393e-11	2.35669e-08	0	8.24586e-05	8.93561e-05	8.35869e-05	8.3293e-05	8.24586e-05	8.93561e-05	8.36403e-05	1	8.33334e-05	2.81185e-10	0.00457802	7.62177e-05	8.25932e-05	7.74211e-05	-1	7.71686e-05	0	0	1	0.000151426
724	0		0	0	[h] : dgdg1829Z12Z1627Z10Z + fdxox + o2 + (4) nadph --> dgdg1839Z12Z15Z1627Z10Z + fdxrd + (2) h2o + (4) nadp	Forward only	Glycerolipid metabolism		DGDGW3DS1839Z12Z15Z1627Z10Z	omega-3 desaturase (18:3(9Z,12Z,15Z)/16:2(7Z,10Z)) (DGDG)	1.02252e-05	0.000717147	6.83359e-05	5.0926e-05	1.02252e-05	0.000717147	7.56018e-05	1	5.83923e-05	1.82101e-68	3.40599e-11	1.02252e-05	0.000717147	7.56667e-05	1	5.74286e-05	4.00883e-23	3.0817e-11	1	1.84054e-05	0.00129087	0.000555485	0.000523553	1.84054e-05	0.00129087	0.000137461	-1	0.000107888	0	0	1.70124e-05	0.00119317	0.00013658	-1	0.000108468	0	0	1	3.37994e-05
725	0		0	0	[h] : dgdg1829Z12Z1634Z7Z10Z + fdxox + o2 + (4) nadph --> dgdg1839Z12Z15Z1634Z7Z10Z + fdxrd + (2) h2o + (4) nadp	Forward only	Glycerolipid metabolism		DGDGW3DS1839Z12Z15Z1634Z7Z10Z	omega-3 desaturase (18:3(9Z,12Z,15Z)/16:3(4Z,7Z,10Z)) (DGDG)	0	0.000623318	3.82159e-05	2.77711e-05	0	0.000623318	4.08711e-05	1	3.02171e-05	2.1348e-17	0.00149848	0	0.000623318	4.32668e-05	1	3.11899e-05	4.95775e-25	1.89241e-10	1	0	0.00112197	5.5854e-05	3.65288e-05	0	0.00112197	7.27177e-05	1	5.5872e-05	1.75135e-283	4.09597e-35	0	0.00103706	6.03924e-05	1	4.06187e-05	1.44455e-12	0.00155313	1	0
726	0		0	0	[h] : dgdg1829Z12Z1637Z10Z13Z + fdxox + o2 + (4) nadph --> dgdg1839Z12Z15Z1637Z10Z13Z + fdxrd + (2) h2o + (4) nadp	Forward only	Glycerolipid metabolism		DGDGW3DS1839Z12Z15Z1637Z10Z13Z1	omega-3 desaturase (18:3(9Z,12Z,15Z)/16:3(7Z,10Z,13Z)) (DGDG)	0	0.000623318	3.52765e-05	2.47411e-05	0	0.000623318	3.19568e-05	-1	2.12781e-05	6.72353e-72	2.73043e-05	0	0.000623318	3.75658e-05	1	2.65154e-05	2.45619e-10	0.00459564	1	0	0.00112197	5.42642e-05	3.59372e-05	0	0.00112197	5.79228e-05	1	3.97194e-05	1.44455e-12	0.0227905	0	0.00103706	6.38132e-05	1	4.45254e-05	8.46415e-90	3.29579e-13	1	0
727	0		1	0	[h] : dgdg1839Z12Z15Z1627Z10Z + fdxox + o2 + (4) nadph --> dgdg1839Z12Z15Z1637Z10Z13Z + fdxrd + (2) h2o + (4) nadp	Forward only	Glycerolipid metabolism		DGDGW3DS1839Z12Z15Z1637Z10Z13Z2	omega-3 desaturase (18:3(9Z,12Z,15Z)/16:3(7Z,10Z,13Z)) (DGDG)	0	0.000623318	2.17138e-05	1.3626e-05	0	0.000623318	2.62639e-05	1	1.91429e-05	6.65649e-184	1.31583e-13	0	0.000623318	2.34103e-05	1	1.48718e-05	1.0634e-09	0.0172971	1	0	0.00112197	5.27693e-05	3.85633e-05	0	0.00112197	5.12541e-05	0	3.7746e-05	0.00688685	0.476452	0	0.00103706	3.87132e-05	0	2.53214e-05	5.67882e-272	3.22959e-38	0	0
728	1		0	0	[h] : dgdg1839Z12Z15Z1637Z10Z13Z + fdxox + o2 + (4) nadph --> dgdg1839Z12Z15Z1644Z7Z10Z13Z + fdxrd + (2) h2o + (4) nadp	Forward only	Glycerolipid metabolism		DGDGW3DS1839Z12Z15Z1644Z7Z10Z13Z	omega-3 desaturase (18:3(9Z,12Z,15Z)/16:4(4Z,7Z,10Z,13Z)) (DGDG)	0	0.00054742	2.06593e-05	1.11481e-05	0	0.00054742	2.06781e-05	0	1.18295e-05	0.00152681	1.49228	0	0.00054742	2.08414e-05	0	1.15817e-05	0.12774	1.25446	0	0	0.000985356	4.17324e-05	2.50401e-05	0	0.000985356	4.13235e-05	0	2.53421e-05	0.0116683	1.27739	0	0.000910779	3.69164e-05	0	2.13646e-05	3.23797e-31	5.30633e-05	0	0
729	0		0	0	[h] : dgdg1819Z1617Z + fdxox + o2 + (4) nadph --> dgdg1819Z1627Z10Z + fdxrd + (2) h2o + (4) nadp	Forward only	Glycerolipid metabolism		DGDGW6DS1819Z1627Z10Z	omega-6 desaturase (18:1(9Z)/16:2(7Z,10Z)) (DGDG)	1.52871e-05	0.000837765	0.000192107	0.000169651	1.52871e-05	0.000837765	0.000171483	-1	0.000144385	4.15019e-98	1.7909e-35	1.52871e-05	0.000837765	0.000167188	-1	0.000137757	1.58104e-158	1.30709e-47	1	2.75167e-05	0.00150798	0.000763525	0.000725924	2.75167e-05	0.00150798	0.000286966	-1	0.000231916	0	0	2.54341e-05	0.00139385	0.000305557	-1	0.000259069	0	0	1	5.05313e-05
730	0		0	1	[h] : dgdg1819Z160 + fdxox + o2 + (4) nadph --> dgdg1829Z12Z160 + fdxrd + (2) h2o + (4) nadp	Forward only	Glycerolipid metabolism		DGDGW6DS1829Z12Z160	omega-6 desaturase (18:2(9Z,12Z)/16:0) (DGDG)	0.000109296	0.000948985	0.000217377	0.000190293	0.000109296	0.000948985	0.000218204	0	0.000191861	0.00164696	1.12078	0.000109296	0.000948985	0.000232405	0	0.000204977	1.36798e-25	1.32874e-18	0	0.000196732	0.00170817	0.000413907	0.000358856	0.000196732	0.00170817	0.000403522	-1	0.000350834	0.00141485	0.00248502	0.000181842	0.00157889	0.000395089	-1	0.000347798	1.85853e-19	9.03328e-10	1	0.000361276
731	1		0	0	[h] : dgdg1819Z1617Z + fdxox + o2 + (4) nadph --> dgdg1829Z12Z1617Z + fdxrd + (2) h2o + (4) nadp	Forward only	Glycerolipid metabolism		DGDGW6DS1829Z12Z1617Z	omega-6 desaturase (18:2(9Z,12Z)/16:1(7Z)) (DGDG)	0	0.000832036	7.8979e-05	5.58854e-05	0	0.000832036	7.95037e-05	0	5.7008e-05	0.000467033	1.22055	0	0.000832036	9.95235e-05	0	7.56529e-05	7.64118e-142	8.42986e-47	0	0	0.00149766	0.000131166	9.00385e-05	0	0.00149766	0.000159085	0	0.000123404	3.6367e-194	3.059e-30	0	0.00138431	0.000134303	0	9.43571e-05	0.00103913	0.34721	0	0
732	0		0	0	[h] : dgdg1819Z1619Z + fdxox + o2 + (4) nadph --> dgdg1829Z12Z1619Z + fdxrd + (2) h2o + (4) nadp	Forward only	Glycerolipid metabolism		DGDGW6DS1829Z12Z1619Z	omega-6 desaturase (18:2(9Z,12Z)/16:1(9Z)) (DGDG)	5.72629e-06	9.55824e-06	6.47891e-06	6.3306e-06	5.72629e-06	9.55824e-06	6.51434e-06	1	6.3602e-06	0.000109357	0.00120498	5.72629e-06	9.55824e-06	6.606e-06	1	6.45283e-06	4.45566e-29	1.17033e-35	1	1.03073e-05	1.72048e-05	1.1716e-05	1.14122e-05	1.03073e-05	1.72048e-05	1.16695e-05	-1	1.13632e-05	0.00488913	0.0320145	9.52721e-06	1.59027e-05	1.0958e-05	-1	1.07072e-05	0	0	1	1.89282e-05
733	0		0	0	[h] : dgdg1819Z1627Z10Z + fdxox + o2 + (4) nadph --> dgdg1829Z12Z1627Z10Z + fdxrd + (2) h2o + (4) nadp	Forward only	Glycerolipid metabolism		DGDGW6DS1829Z12Z1627Z10Z1	omega-6 desaturase (18:2(9Z,12Z)/16:2(7Z,10Z)) (DGDG)	0	0.000822478	7.67158e-05	5.90127e-05	0	0.000822478	7.31955e-05	-1	5.53442e-05	4.32351e-17	0.0105966	0	0.000822478	6.33908e-05	-1	4.34188e-05	1.31187e-192	1.18772e-28	1	0	0.00148046	0.00060985	0.000571794	0	0.00148046	0.00010623	-1	7.5295e-05	0	0	0	0.00136841	0.000149806	-1	0.000117856	0	0	1	0
734	1		0	0	[h] : dgdg1829Z12Z1617Z + fdxox + o2 + (4) nadph --> dgdg1829Z12Z1627Z10Z + fdxrd + (2) h2o + (4) nadp	Forward only	Glycerolipid metabolism		DGDGW6DS1829Z12Z1627Z10Z2	omega-6 desaturase (18:2(9Z,12Z)/16:2(7Z,10Z)) (DGDG)	0	0.000822478	0.000132385	0.000105104	0	0.000822478	0.000134686	0	0.000107287	0.013259	0.434616	0	0.000822478	0.000161727	0	0.000134154	1.36533e-99	3.75831e-63	0	0	0.00148046	0.000239476	0.00018329	0	0.00148046	0.000264539	0	0.000213948	1.55727e-77	6.36264e-16	0	0.00136841	0.000243663	0	0.0001991	5.08937e-08	0.303618	0	0
735	0		1	0	[h] : dgdg1819Z1634Z7Z10Z + fdxox + o2 + (4) nadph --> dgdg1829Z12Z1634Z7Z10Z + fdxrd + (2) h2o + (4) nadp	Forward only	Glycerolipid metabolism		DGDGW6DS1829Z12Z1634Z7Z10Z	omega-6 desaturase (18:2(9Z,12Z)/16:3(4Z,7Z,10Z))	0	0.000697944	1.66181e-05	9.46087e-06	0	0.000697944	2.87321e-05	1	2.15427e-05	0	1.29378e-92	0	0.000697944	3.10911e-05	1	2.22554e-05	0	1.80522e-112	1	0	0.0012563	3.22351e-05	1.92667e-05	0	0.0012563	5.31973e-05	0	4.01082e-05	0	2.38698e-75	0	0.00116122	3.3703e-05	0	1.98579e-05	0.116189	0.299347	0	0
736	0		1	0	[h] : dgdg1819Z1637Z10Z13Z + fdxox + o2 + (4) nadph --> dgdg1829Z12Z1637Z10Z13Z + fdxrd + (2) h2o + (4) nadp	Forward only	Glycerolipid metabolism		DGDGW6DS1829Z12Z1637Z10Z13Z	omega-6 desaturase (18:2(9Z,12Z)/16:3(7Z,10Z,13Z)) (DGDG)	0	0.000697944	2.48107e-05	1.79362e-05	0	0.000697944	2.09181e-05	-1	1.36153e-05	4.90288e-114	2.44394e-10	0	0.000697944	1.97836e-05	-1	1.14801e-05	8.38553e-244	3.58127e-16	1	0	0.0012563	2.93942e-05	1.80669e-05	0	0.0012563	3.56334e-05	0	2.37248e-05	3.07303e-69	2.65572e-09	0	0.00116122	2.93499e-05	0	1.74262e-05	0.0706007	1.45605	0	0
737	0		0	1	[c] : dgts1601829Z12Z + o2 + (2) nadh --> dgts1601835Z9Z12Z + (2) h2o + (2) nad	Forward only	Glycerolipid metabolism	1.14.19.-	DGTSD5DS1601835Z9Z12Z	delta5 desaturase (16:0/18:3(5Z,9Z,12Z))	0.000114271	0.000114271	0.000114271	0.000114271	0.000114271	0.000114271	0.000114271	0	0.000114271	2.20751e-15	1.21697e-09	0.000114271	0.000114271	0.000114271	0	0.000114271	0	5.06648450145800e-311	0	0.000205687	0.000205687	0.000205687	0.000205687	0.000205687	0.000205687	0.000205687	1	0.000205687	0	0	0.00019012	0.00019012	0.00019012	-1	0.00019012	0	0	1	0.000377721
738	0		0	0	[c] : dgts18111Z1829Z12Z + o2 + (2) nadh --> dgts18111Z1835Z9Z12Z + (2) h2o + (2) nad	Forward only	Glycerolipid metabolism	1.14.19.-	DGTSD5DS18111Z1835Z9Z12Z	delta5 desaturase (18:1(11Z)/18:3(5Z,9Z,12Z)) (DGTS)	1.28336e-05	1.28336e-05	1.28336e-05	1.28336e-05	1.28336e-05	1.28336e-05	1.28336e-05	1	1.28336e-05	4.86286e-135	3.78293e-111	1.28336e-05	1.28336e-05	1.28336e-05	1	1.28336e-05	1.4338e-24	1.02897e-08	1	2.31005e-05	2.31005e-05	2.31005e-05	2.31005e-05	2.31005e-05	2.31005e-05	2.31005e-05	-1	2.31005e-05	1.56456e-72	3.41356e-97	2.13521e-05	2.13521e-05	2.13521e-05	-1	2.13521e-05	0	0	1	4.24214e-05
739	1		0	0	[c] : dgts1819Z1829Z12Z + o2 + (2) nadh --> dgts1819Z1835Z9Z12Z + (2) h2o + (2) nad	Forward only	Glycerolipid metabolism	1.14.19.-	DGTSD5DS1819Z1835Z9Z12Z	delta5 desaturase (18:1(9Z)/18:3(5Z,9Z,12Z)) (DGTS)	1.28336e-05	7.34901e-05	2.7213e-05	2.50184e-05	1.28336e-05	7.34901e-05	2.70897e-05	0	2.47395e-05	0.208933	0.878472	1.28336e-05	7.34901e-05	2.80552e-05	0	2.56121e-05	0.00112316	1.08529e-06	0	2.31005e-05	0.000132282	4.92218e-05	4.47128e-05	2.31005e-05	0.000132282	4.95451e-05	0	4.49893e-05	0.00899312	0.636277	2.13521e-05	0.00012227	4.76355e-05	0	4.38282e-05	8.47958e-12	8.53118e-08	0	4.24214e-05
740	1		0	0	[c] : dgts1829Z12Z1829Z12Z + o2 + (2) nadh --> dgts1829Z12Z1835Z9Z12Z + (2) h2o + (2) nad	Forward only	Glycerolipid metabolism	1.14.19.-	DGTSD5DS1829Z12Z1835Z9Z12Z	delta5 desaturase (18:2(9Z,12Z)/18:3(5Z,9Z,12Z))	0	6.06565e-05	4.62772e-05	4.84718e-05	0	6.06565e-05	4.64004e-05	0	4.87506e-05	0.208933	0.878472	0	6.06565e-05	4.54349e-05	0	4.7878e-05	0.00112316	1.08529e-06	0	0	0.000109182	8.30605e-05	8.75694e-05	0	0.000109182	8.27371e-05	0	8.72929e-05	0.00899312	0.636277	0	0.000100918	7.4635e-05	0	7.84423e-05	1.43923e-232	2.52917e-181	0	0
741	0		0	1	[c] : dgts1601819Z + o2 + (2) nadh --> dgts1601829Z12Z + (2) h2o + (2) nad	Forward only	Glycerolipid metabolism	1.14.19.-	DGTSDS1601829Z12Z	oleate desaturase (16:0/18:2(9Z,12Z))	0.000135452	0.000135452	0.000135452	0.000135452	0.000135452	0.000135452	0.000135452	0	0.000135452	1.34817e-08	1.53195e-07	0.000135452	0.000135452	0.000135452	0	0.000135452	1.27507e-05	0.313337	0	0.000243813	0.000243813	0.000243813	0.000243813	0.000243813	0.000243813	0.000243813	-1	0.000243813	1.06713e-77	7.50697e-68	0.00022536	0.00022536	0.00022536	-1	0.00022536	0	0	1	0.000447735
742	0		0	0	[c] : dgts1601835Z9Z12Z + o2 + (2) nadh --> dgts1601845Z9Z12Z15Z + (2) h2o + (2) nad	Forward only	Glycerolipid metabolism	1.14.19.-	DGTSDS1601845Z9Z12Z15Z	linoleate desaturase (16:0/18:4(5Z,9Z,12Z,15Z))	3.99331e-05	3.99331e-05	3.99331e-05	3.99331e-05	3.99331e-05	3.99331e-05	3.99331e-05	-1	3.99331e-05	0	0	3.99331e-05	3.99331e-05	3.99331e-05	-1	3.99331e-05	0	0	1	7.18795e-05	7.18795e-05	7.18795e-05	7.18795e-05	7.18795e-05	7.18795e-05	7.18795e-05	-1	7.18795e-05	3.45958e-34	4.04642e-18	6.64393e-05	6.64393e-05	6.64393e-05	-1	6.64393e-05	0	0	1	0.000131999
743	0		0	0	[c] : dgts18111Z1819Z + o2 + (2) nadh --> dgts18111Z1829Z12Z + (2) h2o + (2) nad	Forward only	Glycerolipid metabolism	1.14.19.-	DGTSDS18111Z1829Z12Z	oleate desaturase (18:1(11Z)/18:2(9Z,12Z)) (DGTS)	1.66694e-05	1.66694e-05	1.66694e-05	1.66694e-05	1.66694e-05	1.66694e-05	1.66694e-05	1	1.66694e-05	8.61678e-155	8.52097e-166	1.66694e-05	1.66694e-05	1.66694e-05	1	1.66694e-05	2.17968e-14	0.00794609	1	3.00049e-05	3.00049e-05	3.00049e-05	3.00049e-05	3.00049e-05	3.00049e-05	3.00049e-05	-1	3.00049e-05	7.48671e-79	1.19478e-123	2.7734e-05	2.7734e-05	2.7734e-05	-1	2.7734e-05	0	0	1	5.51006e-05
744	0		0	1	[c] : dgts18111Z1835Z9Z12Z + o2 + (2) nadh --> dgts18111Z1845Z9Z12Z15Z + (2) h2o + (2) nad	Forward only	Glycerolipid metabolism	1.14.19.-	DGTSDS18111Z1845Z9Z12Z15Z	linoleate desaturase (18:1(11Z)/18:4(5Z,9Z,12Z,15Z)) (DGTS)	5.1416e-06	5.1416e-06	5.1416e-06	5.1416e-06	5.1416e-06	5.1416e-06	5.1416e-06	0	5.1416e-06	0.00787616	0.108219	5.1416e-06	5.1416e-06	5.1416e-06	0	5.1416e-06	6.23734e-75	2.15241e-50	0	9.25487e-06	9.25487e-06	9.25487e-06	9.25487e-06	9.25487e-06	9.25487e-06	9.25487e-06	-1	9.25487e-06	0	5.987e-289	8.55442e-06	8.55442e-06	8.55442e-06	-1	8.55442e-06	0	0	1	1.69955e-05
745	1		0	0	[c] : dgts1819Z1819Z + o2 + (2) nadh --> dgts1819Z1829Z12Z + (2) h2o + (2) nad	Forward only	Glycerolipid metabolism	1.14.19.-	DGTSDS1819Z1829Z12Z	oleate desaturase (18:1(9Z)/18:2(9Z,12Z)) (DGTS)	1.66694e-05	8.50178e-05	4.44924e-05	4.39918e-05	1.66694e-05	8.50178e-05	4.44872e-05	0	4.41661e-05	0.573971	1.4933	1.66694e-05	8.50178e-05	4.60662e-05	0	4.63788e-05	9.42461e-11	7.34612e-13	0	3.00049e-05	0.000153032	8.05574e-05	8.02964e-05	3.00049e-05	0.000153032	7.98784e-05	0	7.92219e-05	0.278323	0.214895	2.7734e-05	0.00014145	7.90336e-05	0	7.96656e-05	8.17622e-10	0.000103846	0	5.51006e-05
746	0		0	1	[c] : dgts1819Z1835Z9Z12Z + o2 + (2) nadh --> dgts1819Z1845Z9Z12Z15Z + (2) h2o + (2) nad	Forward only	Glycerolipid metabolism	1.14.19.-	DGTSDS1819Z1845Z9Z12Z15Z	linoleate desaturase (18:1(9Z)/18:4(5Z,9Z,12Z,15Z)) (DGTS)	5.1416e-06	1.43272e-05	6.30365e-06	5.99012e-06	5.1416e-06	1.43272e-05	6.33208e-06	0	6.01596e-06	0.000758289	0.343332	5.1416e-06	1.43272e-05	6.36933e-06	0	6.04309e-06	0.00152681	0.00154336	0	9.25487e-06	2.5789e-05	1.13402e-05	1.0769e-05	9.25487e-06	2.5789e-05	1.14424e-05	1	1.08688e-05	6.27639e-10	0.0103852	8.55442e-06	2.38372e-05	1.07584e-05	-1	1.02367e-05	2.98324e-196	3.40856e-66	1	1.69955e-05
747	0		0	0	[c] : dgts1819Z18111Z + o2 + (2) nadh --> dgts1829Z12Z18111Z + (2) h2o + (2) nad	Forward only	Glycerolipid metabolism	1.14.19.-	DGTSDS1829Z12Z18111Z	oleate desaturase (18:2(9Z,12Z)/18:1(11Z))	7.83067e-06	7.83067e-06	7.83067e-06	7.83067e-06	7.83067e-06	7.83067e-06	7.83067e-06	1	7.83067e-06	5.74447e-123	1.65268e-129	7.83067e-06	7.83067e-06	7.83067e-06	1	7.83067e-06	0	0	1	1.40952e-05	1.40952e-05	1.40952e-05	1.40952e-05	1.40952e-05	1.40952e-05	1.40952e-05	-1	1.40952e-05	0	0	1.30284e-05	1.30284e-05	1.30284e-05	-1	1.30284e-05	0	0	1	2.58842e-05
748	1		0	0	[c] : dgts1819Z1819Z + o2 + (2) nadh --> dgts1829Z12Z1819Z + (2) h2o + (2) nad	Forward only	Glycerolipid metabolism	1.14.19.-	DGTSDS1829Z12Z1819Z	oleate desaturase (18:2(9Z,12Z)/18:1(9Z))	7.83067e-06	7.61791e-05	4.83561e-05	4.88568e-05	7.83067e-06	7.61791e-05	4.83613e-05	0	4.86824e-05	0.573971	1.4933	7.83067e-06	7.61791e-05	4.67823e-05	0	4.64697e-05	9.42461e-11	7.34612e-13	0	1.40952e-05	0.000137122	8.657e-05	8.6831e-05	1.40952e-05	0.000137122	8.72489e-05	0	8.79054e-05	0.278323	0.214895	1.30284e-05	0.000126744	7.54447e-05	0	7.48127e-05	4.15019e-98	2.36338e-187	0	2.58842e-05
749	1		0	0	[c] : dgts1829Z12Z1819Z + o2 + (2) nadh --> dgts1829Z12Z1829Z12Z + (2) h2o + (2) nad	Forward only	Glycerolipid metabolism	1.14.19.-	DGTSDS1829Z12Z1829Z12Z1	oleate desaturase (18:2(9Z,12Z)/18:2(9Z,12Z))	0	6.83484e-05	4.05255e-05	4.10261e-05	0	6.83484e-05	4.05305e-05	0	4.08518e-05	0.573971	1.4933	0	6.83484e-05	3.89516e-05	0	3.8639e-05	9.42461e-11	7.34612e-13	0	0	0.000123027	7.24748e-05	7.27357e-05	0	0.000123027	7.31537e-05	0	7.38102e-05	0.278323	0.214895	0	0.000113716	6.24163e-05	0	6.17843e-05	3.39031e-82	1.36372e-154	0	0
750	1		0	0	[c] : dgts1819Z1829Z12Z + o2 + (2) nadh --> dgts1829Z12Z1829Z12Z + (2) h2o + (2) nad	Forward only	Glycerolipid metabolism	1.14.19.-	DGTSDS1829Z12Z1829Z12Z2	oleate desaturase (18:2(9Z,12Z)/18:2(9Z,12Z))	0	6.83484e-05	1.34436e-05	1.09073e-05	0	6.83484e-05	1.35615e-05	0	1.08742e-05	0.607374	0.929027	0	6.83484e-05	1.41751e-05	0	1.16233e-05	2.27986e-05	2.73084e-05	0	0	0.000123027	2.44311e-05	1.94704e-05	0	0.000123027	2.34288e-05	0	1.83061e-05	2.50818e-05	0.00232289	0	0.000113716	2.50162e-05	0	2.07609e-05	0.000184985	0.0891916	0	0
751	0		0	0	[c] : dgts1819Z1835Z9Z12Z + o2 + (2) nadh --> dgts1829Z12Z1835Z9Z12Z + (2) h2o + (2) nad	Forward only	Glycerolipid metabolism	1.14.19.-	DGTSDS1829Z12Z1835Z9Z12Z	oleate desaturase (18:2(9Z,12Z)/18:3(5Z,9Z,12Z)) (DGTS)	0	6.06565e-05	1.32173e-05	1.10052e-05	0	6.06565e-05	1.30655e-05	0	1.07527e-05	0.0782497	0.704663	0	6.06565e-05	1.39938e-05	0	1.15504e-05	0.00239091	3.94041e-06	0	0	0.000109182	2.4036e-05	1.9525e-05	0	0.000109182	2.42571e-05	0	1.9671e-05	0.00239091	0.913525	0	0.000100918	2.40794e-05	0	2.03264e-05	0.00396153	1.34292	0	0
752	0		0	0	[c] : dgts1819Z1845Z9Z12Z15Z + o2 + (2) nadh --> dgts1829Z12Z1845Z9Z12Z15Z + (2) h2o + (2) nad	Forward only	Glycerolipid metabolism	1.14.19.-	DGTSDS1829Z12Z1845Z9Z12Z15Z1	linoleate desaturase (18:2(9Z,12Z)/18:4(5Z,9Z,12Z,15Z))	0	9.18563e-06	8.17291e-07	0	0	9.18563e-06	8.28784e-07	0	0	0.931317	1.13267	0	9.18563e-06	8.90264e-07	0	0	0.041205	0.00517054	0	0	1.65341e-05	1.90782e-06	1.51409e-06	0	1.65341e-05	2.04611e-06	1	1.61391e-06	6.27639e-10	0.000770851	0	1.52827e-05	2.04514e-06	1	1.68225e-06	6.21384e-11	0.000425791	1	0
753	0		0	0	[c] : dgts1829Z12Z1835Z9Z12Z + o2 + (2) nadh --> dgts1829Z12Z1845Z9Z12Z15Z + (2) h2o + (2) nad	Forward only	Glycerolipid metabolism	1.14.19.-	DGTSDS1829Z12Z1845Z9Z12Z15Z2	oleate desaturase (18:2(9Z,12Z)/18:4(5Z,9Z,12Z,15Z))	0	9.18563e-06	3.01142e-06	2.75921e-06	0	9.18563e-06	3.12473e-06	1	2.82505e-06	1.07945e-06	1.73893e-06	0	9.18563e-06	3.17077e-06	1	2.87774e-06	1.83006e-07	5.52979e-12	1	0	1.65341e-05	5.6489e-06	5.12269e-06	0	1.65341e-05	5.49479e-06	-1	4.87936e-06	1.83006e-07	0.000671801	0	1.52827e-05	5.48419e-06	-1	5.02375e-06	6.35557e-06	0.00011139	1	0
754	0		0	0	[c] : dgts1829Z12Z18111Z + o2 + (2) nadh --> dgts1839Z12Z15Z18111Z + (2) h2o + (2) nad	Forward only	Glycerolipid metabolism	1.14.19.-	DGTSDS1839Z12Z15Z18111Z	linoleate desaturase (18:3(9Z,12Z,15Z)/18:1(11Z))	6.41e-06	6.41e-06	6.41e-06	6.41e-06	6.41e-06	6.41e-06	6.41e-06	1	6.41e-06	1.78186e-54	2.96243e-44	6.41e-06	6.41e-06	6.41e-06	1	6.41e-06	0	0	1	1.1538e-05	1.1538e-05	1.1538e-05	1.1538e-05	1.1538e-05	1.1538e-05	1.1538e-05	-1	1.1538e-05	0	0	1.06647e-05	1.06647e-05	1.06647e-05	-1	1.06647e-05	0	0	1	2.11882e-05
755	0		0	0	[c] : dgts1829Z12Z1819Z + o2 + (2) nadh --> dgts1839Z12Z15Z1819Z + (2) h2o + (2) nad	Forward only	Glycerolipid metabolism	1.14.19.-	DGTSDS1839Z12Z15Z1819Z	linoleate desaturase (18:3(9Z,12Z,15Z)/18:1(9Z))	6.41e-06	6.41e-06	6.41e-06	6.41e-06	6.41e-06	6.41e-06	6.41e-06	-1	6.41e-06	0	0	6.41e-06	6.41e-06	6.41e-06	-1	6.41e-06	0	0	1	1.1538e-05	1.1538e-05	1.1538e-05	1.1538e-05	1.1538e-05	1.1538e-05	1.1538e-05	1	1.1538e-05	1.35469e-106	3.53591e-65	1.06647e-05	1.06647e-05	1.06647e-05	-1	1.06647e-05	0	0	1	2.11882e-05
756	0		1	0	[c] : dgts1829Z12Z1835Z9Z12Z + o2 + (2) nadh --> dgts1839Z12Z15Z1835Z9Z12Z + (2) h2o + (2) nad	Forward only	Glycerolipid metabolism	1.14.19.-	DGTSDS1839Z12Z15Z1835Z9Z12Z	linoleate desaturase (18:3(9Z,12Z,15Z)/18:3(5Z,9Z,12Z))	2.06213e-05	2.83749e-05	2.56327e-05	2.57912e-05	2.06213e-05	2.83749e-05	2.54916e-05	-1	2.56207e-05	7.76999e-06	1.11157e-08	2.06213e-05	2.83749e-05	2.54081e-05	-1	2.5515e-05	5.47734e-12	6.47666e-20	1	3.71184e-05	5.10749e-05	4.59183e-05	4.60996e-05	3.71184e-05	5.10749e-05	4.59702e-05	0	4.6261e-05	0.0275967	0.560985	3.43091e-05	4.72093e-05	4.19037e-05	0	4.20015e-05	0	0	0	6.81637e-05
757	0		1	0	[c] : dgts1829Z12Z1845Z9Z12Z15Z + o2 + (2) nadh --> dgts1839Z12Z15Z1845Z9Z12Z15Z + (2) h2o + (2) nad	Forward only	Glycerolipid metabolism	1.14.19.-	DGTSDS1839Z12Z15Z1845Z9Z12Z15Z1	linoleate desaturase (18:3(9Z,12Z,15Z)/18:4(5Z,9Z,12Z,15Z))	0	7.75361e-06	2.71766e-06	2.58371e-06	0	7.75361e-06	2.87594e-06	1	2.75425e-06	7.76999e-06	3.14128e-10	0	7.75361e-06	2.9525e-06	1	2.85991e-06	5.47734e-12	1.91053e-20	1	0	1.39565e-05	5.15628e-06	4.9753e-06	0	1.39565e-05	5.10457e-06	0	4.81387e-06	0.0275967	0.562329	0	1.29002e-05	5.30559e-06	0	5.20782e-06	7.64125e-05	0.00108975	0	0
758	0		1	0	[c] : dgts1839Z12Z15Z1835Z9Z12Z + o2 + (2) nadh --> dgts1839Z12Z15Z1845Z9Z12Z15Z + (2) h2o + (2) nad	Forward only	Glycerolipid metabolism	1.14.19.-	DGTSDS1839Z12Z15Z1845Z9Z12Z15Z2	linoleate desaturase (18:3(9Z,12Z,15Z)/18:4(5Z,9Z,12Z,15Z))	0	7.75361e-06	5.01125e-06	5.1699e-06	0	7.75361e-06	4.8702e-06	-1	4.99936e-06	7.76999e-06	1.13421e-08	0	7.75361e-06	4.786e-06	-1	4.8937e-06	5.47734e-12	5.57835e-20	1	0	1.39565e-05	8.79988e-06	8.9812e-06	0	1.39565e-05	8.85163e-06	0	9.14263e-06	0.0275967	0.562329	0	1.29002e-05	7.59449e-06	0	7.69238e-06	1.20274e-112	1.98759e-168	0	0
759	1		0	0	[c] : ocdca + atp + coa --> amp + ppi + ocdccoa	Forward only	Glycerolipid metabolism	6.2.1.3	FACOAL180	long-chain acyl-CoA synthetase (18:0)	0.000368657	0.0168929	0.00043144	0.000394157	0.000368657	0.0168929	0.000437882	0	0.000399021	2.01818e-46	0.693862	0.000368657	0.0168929	0.000434359	0	0.000393596	0.236861	1.11465	0	0.000663582	0.0308197	0.000776796	0.000713491	0.000663582	0.0308197	0.000776639	0	0.000716507	1.94617e-08	1.49407	0.000613359	0.0484408	0.000802436	0	0.0006939	2.47685e-302	0.149329	0	0.00121859
760	0		0	0	[c] : ocdce9a + atp + coa --> amp + ppi + ocdce9coa	Forward only	Glycerolipid metabolism	6.2.1.3	FACOAL181	long-chain acyl-CoA synthetase (18:1(9Z))	0	0.0165242	0.000195913	8.1468e-05	0	0.0165242	0.000218679	0	0.000104856	5.31861e-62	0.191577	0	0.0165242	0.000207907	0	9.32202e-05	3.62985e-15	0.645101	0	0	0.0301561	0.000351252	0.000159337	0	0.0301561	0.000364169	0	0.000187301	7.99684e-27	1.04194	0	0.0478275	0.000708907	0	0.000331412	0	2.81642e-31	0	0
761	1		0	0	[c] : ocdcea + atp + coa --> amp + ppi + ocdcecoa	Forward only	Glycerolipid metabolism	6.2.1.3	FACOAL18111Z	long-chain acyl-CoA synthetase (18:1(11Z))	0.00102231	0.0175465	0.00121718	0.00110998	0.00102231	0.0175465	0.0011798	0	0.00109856	3.05077e-22	0.00216848	0.00102231	0.0175465	0.00120922	0	0.00110907	0.362875	0.864293	0	0.00184016	0.0319963	0.00216303	0.00199995	0.00184016	0.0319963	0.00220881	0	0.00204025	3.56752e-66	0.061145	0.00170089	0.0495284	0.00222471	0	0.00195826	7.06841e-222	0.0271662	0	0.00337925
762	0		0	0	[c] : glyc3p + pmtcoa --> 1hdecg3p + coa	Forward only	Glycerolipid metabolism	2.3.1.15	G3PAT160	glycerol-3-phosphate: acyl-coa acyltransferase (16:0)	0.000435087	0.00876012	0.000596196	0.000518945	0.000435087	0.00876012	0.000565392	-1	0.000467358	1.16946e-219	2.86381e-15	0.000435087	0.00876012	0.00046062	-1	0.000446084	0	0	1	0.000783156	0.0159332	0.000870886	0.000828438	0.000783156	0.0159332	0.000884887	1	0.000838985	9.4571e-38	0.0036261	0.000723883	0.0241477	0.000813322	-1	0.000759875	0	1.32264e-19	1	0.00143818
763	0		0	0	[h] : glyc3p + palmACP --> 1hdecg3p + ACP	Forward only	Glycerolipid metabolism	2.3.1.15	G3PAT160h	glycerol-3-phosphate acyltransferase (C16:0)	4.66124e-05	4.66124e-05	4.66124e-05	4.66124e-05	4.66124e-05	4.66124e-05	4.66124e-05	-1	4.66124e-05	6.15525e-265	1.09987e-222	4.66124e-05	4.66124e-05	4.66124e-05	-1	4.66124e-05	0	0	1	8.39024e-05	8.39024e-05	8.39024e-05	8.39024e-05	8.39024e-05	8.39024e-05	8.39024e-05	-1	8.39024e-05	0	0	7.75522e-05	7.75522e-05	7.75522e-05	-1	7.75522e-05	0	0	1	0.000154077
764	1		0	0	[c] : glyc3p + ocdccoa --> 1odecg3p + coa	Forward only	Glycerolipid metabolism	2.3.1.15	G3PAT180	glycerol-3-phosphate: acyl-coa acyltransferase (18:0)	0.000200797	0.00734149	0.000207702	0.000202431	0.000200797	0.00734149	0.000214749	0	0.000205901	0	3.17247e-05	0.000200797	0.00734149	0.000208106	0	0.00020249	0.116189	1.26039	0	0.000361435	0.0133797	0.000373301	0.000364715	0.000361435	0.0133797	0.000371894	0	0.000364713	2.50818e-05	1.07277	0.00033408	0.0217781	0.000351556	0	0.000339726	0	4.79531e-14	0	0.000663734
765	0		0	0	[h] : glyc3p + ocdcaACP --> 1odecg3p + ACP	Forward only	Glycerolipid metabolism	2.3.1.15	G3PAT180h	glycerol-3-phosphate acyltransferase (C18:0)	0	0	0	0	0	0	0	0	0	1	NaN	0	0	0	0	0	1	NaN	0	0	0	0	0	0	0	0	0	0	1	NaN	0	0	0	0	0	1	NaN	0	0
766	1		0	0	[c] : glyc3p + ocdcecoa --> 1odec11eg3p + coa	Forward only	Glycerolipid metabolism	2.3.1.15	G3PAT181	glycerol-3-phosphate: acyl-coa acyltransferase (18:1(11Z))	0.000405666	0.00754636	0.000423903	0.000412372	0.000405666	0.00754636	0.000414731	0	0.000408851	0	2.31028e-07	0.000405666	0.00754636	0.000421956	0	0.000411584	1.24321e-12	0.612188	0	0.000730198	0.0137485	0.000761787	0.000743054	0.000730198	0.0137485	0.000767346	0	0.00074516	7.31814e-18	0.316611	0.000674933	0.022119	0.000700857	0	0.0006832	0	2.52682e-51	0	0.00134093
767	1		0	0	[c] : glyc3p + ocdce9coa --> 1odec9eg3p + coa	Forward only	Glycerolipid metabolism	2.3.1.15	G3PAT1819Z	glycerol-3-phosphate: acyl-coa acyltransferase (18:1(9Z))	0.000401973	0.00754267	0.000420128	0.000410036	0.000401973	0.00754267	0.000420179	0	0.000410748	2.79967e-06	1.48911	0.000401973	0.00754267	0.000415441	0	0.00040729	1.35791e-131	0.00858228	0	0.000723552	0.0137418	0.000754107	0.000737715	0.000723552	0.0137418	0.00075673	0	0.000740248	2.03951e-22	0.725989	0.00066879	0.0221129	0.00070588	0	0.000682209	0	6.90932e-35	0	0.00132872
768	0		0	0	[h] : glyc3p + octe9ACP --> 1odec9eg3p + ACP	Forward only	Glycerolipid metabolism	2.3.1.15	G3PAT1819Zh	glycerol-3-phosphate acyltransferase ((9Z)-C18:1)	0.00132752	0.00132752	0.00132752	0.00132752	0.00132752	0.00132752	0.00132752	1	0.00132752	8.97332e-147	1.08383e-104	0.00132752	0.00132752	0.00132752	1	0.00132752	0	0	1	0.00238954	0.00238954	0.00238954	0.00238954	0.00238954	0.00238954	0.00238954	1	0.00238954	0	0	0.00220868	0.00220868	0.00220868	-1	0.00220868	0	0	1	0.00438811
769	0		1	0	[h] : glyc3p + octeACP --> 1odec11eg3p + ACP	Forward only	Glycerolipid metabolism	2.3.1.15	G3PAT181h	glycerol-3-phosphate acyltransferase ((11Z)-C18:1)	7.45589e-05	7.45589e-05	7.45589e-05	7.45589e-05	7.45589e-05	7.45589e-05	7.45589e-05	1	7.45589e-05	1.33383e-255	3.83631e-217	7.45589e-05	7.45589e-05	7.45589e-05	-1	7.45589e-05	0	0	1	0.000134206	0.000134206	0.000134206	0.000134206	0.000134206	0.000134206	0.000134206	0	0.000134206	3.77067754428000e-312	9.09663e-301	0.000124049	0.000124049	0.000124049	0	0.000124049	0	0	0	0.000246454
770	0		0	0	[c] : atp + glyc --> adp + glyc3p + h	Forward only	Glycerolipid metabolism	2.7.1.30	GLYK	glycerol kinase	0	0.00976855	0.000624459	0.000595714	0	0.00976855	0.000647973	1	0.000618464	1.33784e-06	0.000243012	0	0.00976855	0.000538391	-1	0.000468434	1.44827e-50	2.90125e-48	1	0	0.0177484	0.00113187	0.00106748	0	0.0177484	0.00133652	1	0.00125198	1.19559e-160	4.54119e-88	0	0.0241038	0.000226133	-1	0.000146427	0	0	1	0
771	0		1	0	[c] : mag160 + h2o --> glyc + hdca + h	Forward only	Glycerolipid metabolism	3.1.1.23	MAGAH160	1-acylglycerol acylhydrolase (16:0)	0	0.00832503	0.000160925	8.36303e-05	0	0.00832503	0.000130039	-1	3.12545e-05	1.3405e-221	2.42683e-15	0	0.00832503	2.53332e-05	-1	1.08944e-05	0	0	1	0	0.0151501	8.72937e-05	4.49643e-05	0	0.0151501	0.000101205	0	5.55138e-05	1.93977e-38	0.00386606	0	0.0234238	8.91588e-05	0	3.56449e-05	1.53458e-44	1.19584	0	0
772	0		0	0	[c] : mag180 + h2o --> glyc + ocdca + h	Forward only	Glycerolipid metabolism	3.1.1.23	MAGAH180	1-acylglycerol acylhydrolase (18:0)	0	0.0071407	5.76419e-06	1.28208e-06	0	0.0071407	1.29961e-05	0	4.57119e-06	0	9.17062e-06	0	0.0071407	5.74399e-06	0	1.21594e-06	0.0865876	1.49708	0	0	0.0130183	8.99159e-06	2.19071e-06	0	0.0130183	7.86539e-06	0	2.3046e-06	1.24163e-10	1.12129	0	0.0214441	1.19337e-05	0	3.79313e-06	2.27542e-275	0.45523	0	0
773	0		0	0	[c] : mag18111Z + h2o --> glyc + ocdcea + h	Forward only	Glycerolipid metabolism	3.1.1.23	MAGAH18111Z	1-acylglycerol acylhydrolase (18:1(11Z))	0	0.0071407	1.5242e-05	5.1503e-06	0	0.0071407	6.29157e-06	0	1.89691e-06	0	4.00413e-08	0	0.0071407	1.37212e-05	0	4.53197e-06	5.40393e-11	0.747338	0	0	0.0130183	2.51284e-05	9.50137e-06	0	0.0130183	2.98719e-05	0	1.12015e-05	4.85876e-16	0.376112	0	0.0214441	2.05041e-05	0	5.62389e-06	1.18239e-165	0.381571	0	0
774	1		0	0	[c] : mag1819Z + h2o --> glyc + ocdce9a + h	Forward only	Glycerolipid metabolism	3.1.1.23	MAGAH1819Z	1-acylglycerol acylhydrolase (18:1(9Z))	0	0.0071407	1.40912e-05	5.72001e-06	0	0.0071407	1.28171e-05	0	5.79679e-06	0.00164696	0.734208	0	0.0071407	8.35863e-06	0	2.89537e-06	1.0622e-260	0.000175859	0	0	0.0130183	2.26293e-05	1.00128e-05	0	0.0130183	2.60615e-05	0	1.16694e-05	6.82073e-16	0.412059	0	0.0214441	2.75045e-05	0	8.63038e-06	7.78597e-14	0.285002	0	0
775	0		0	1	[h] : mgdg1819Z1637Z10Z13Z + fdxox + o2 + (4) nadph --> mgdg1819Z1644Z7Z10Z13Z + fdxrd + (2) h2o + (4) nadp	Forward only	Glycerolipid metabolism		MGDGD4DS1819Z1644Z7Z10Z13Z	monogalatcosyldiacylglycerol 16-carbon delta4-desaturase (18:1(9Z)/16:4(4Z,7Z,10Z,13Z))	0	0.000604092	2.14738e-05	1.28007e-05	0	0.000604092	2.28387e-05	0	1.42736e-05	1.57255e-09	0.108219	0	0.000604092	2.30273e-05	0	1.35853e-05	0.00131057	0.0419237	0	0	0.00108737	3.9285e-05	2.37619e-05	0	0.00108737	4.28627e-05	1	2.697e-05	8.7001e-17	0.0104205	0	0.00100507	4.38264e-05	1	2.6571e-05	3.16225e-13	0.000228105	1	0
776	1		0	0	[h] : mgdg1829Z12Z1627Z10Z + fdxox + o2 + (4) nadph --> mgdg1829Z12Z1634Z7Z10Z + fdxrd + (2) h2o + (4) nadp	Forward only	Glycerolipid metabolism		MGDGD4DS1829Z12Z1634Z7Z10Z	monogalatcosyldiacylglycerol 16-carbon delta4-desaturase (18:2(9Z,12Z)/16:3(4Z,7Z,10Z))	0	0.000673605	0.000115738	9.72102e-05	0	0.000673605	0.000118013	0	9.85462e-05	0.00455984	0.201252	0	0.000673605	0.000118942	0	9.85305e-05	0.0782497	0.0303456	0	0	0.00121249	0.000211968	0.000176539	0	0.00121249	0.000250431	0	0.000221278	5.88408e-172	6.20498e-64	0	0.00112072	0.000206956	0	0.000170023	1.94617e-08	0.055113	0	0
777	0		1	0	[h] : mgdg1829Z12Z1637Z10Z13Z + fdxox + o2 + (4) nadph --> mgdg1829Z12Z1644Z7Z10Z13Z + fdxrd + (2) h2o + (4) nadp	Forward only	Glycerolipid metabolism		MGDGD4DS1829Z12Z1644Z7Z10Z13Z	monogalatcosyldiacylglycerol 16-carbon delta4-desaturase (18:2(9Z,12Z)/16:4(4Z,7Z,10Z,13Z))	0	0.000604092	9.35219e-05	7.62679e-05	0	0.000604092	7.10674e-05	-1	5.44172e-05	1.04633e-254	1.81338e-92	0	0.000604092	7.03731e-05	-1	5.32377e-05	8.68452e-279	1.43074e-97	1	0	0.00108737	0.000126406	9.52819e-05	0	0.00108737	0.000121543	0	9.22255e-05	0.000888384	0.050932	0	0.00100507	0.000128898	0	9.82554e-05	0.00488913	0.36762	0	0
778	0		0	0	[h] : mgdg1839Z12Z15Z1627Z10Z + fdxox + o2 + (4) nadph --> mgdg1839Z12Z15Z1634Z7Z10Z + fdxrd + (2) h2o + (4) nadp	Forward only	Glycerolipid metabolism		MGDGD4DS1839Z12Z15Z1634Z7Z10Z	monogalatcosyldiacylglycerol 16-carbon delta4-desaturase (18:3(9Z,12Z,15Z)/16:3(4Z,7Z,10Z))	0	0.000604092	5.36559e-05	3.87922e-05	0	0.000604092	7.64019e-05	1	6.40299e-05	0	6.47913e-127	0	0.000604092	7.88938e-05	1	6.50343e-05	0	6.27904e-146	1	0	0.00108737	0.000143696	0.000118034	0	0.00108737	9.70568e-05	-1	7.23043e-05	0	4.54853e-147	0	0.00100507	0.000128233	-1	0.000105435	1.02348e-39	9.75329e-19	1	0
779	0		1	0	[h] : mgdg1839Z12Z15Z1634Z7Z10Z + fdxox + o2 + (4) nadph --> mgdg1839Z12Z15Z1644Z7Z10Z13Z + fdxrd + (2) h2o + (4) nadp	Forward only	Glycerolipid metabolism		MGDGD4DS1839Z12Z15Z1644Z7Z10Z13Z	monogalatcosyldiacylglycerol 16-carbon delta4-desaturase (18:3(9Z,12Z,15Z)/16:4(4Z,7Z,10Z,13Z))	0	0.000542285	9.16525e-05	7.19963e-05	0	0.000542285	9.69093e-05	1	7.43082e-05	7.14226e-11	0.000222249	0	0.000542285	0.000102842	1	8.0181e-05	5.47734e-12	1.34541e-16	1	0	0.000976112	0.000177909	0.000133776	0	0.000976112	0.000167935	0	0.00012564	2.50818e-05	0.000120023	0	0.000902235	0.000179065	0	0.000145033	2.27169e-06	1.00399	0	0
780	0		1	0	[h] : mgdg1819Z160 + fdxox + o2 + (4) nadph --> mgdg1819Z1617Z + fdxrd + (2) h2o + (4) nadp	Forward only	Glycerolipid metabolism	1.14.19.1	MGDGD7DS1819Z1617Z	monogalatcosyldiacylglycerol palmitate delta7-desaturase (18:1(9Z)/16:1(7Z))	0	0.00076234	0.000380128	0.00037706	0	0.00076234	0.000396438	1	0.000387151	5.75792e-16	1.17037e-11	0	0.00076234	0.000366257	-1	0.000356443	7.16504e-10	2.08137e-08	1	0	0.00137221	0.000245048	0.000188295	0	0.00137221	0.000251959	0	0.000193059	2.29747e-07	0.11557	0	0.00126836	0.000599434	0	0.00057524	0	0	0	0
781	0		1	0	[h] : mgdg1829Z12Z160 + fdxox + o2 + (4) nadph --> mgdg1829Z12Z1617Z + fdxrd + (2) h2o + (4) nadp	Forward only	Glycerolipid metabolism	1.14.19.1	MGDGD7DS1829Z12Z1617Z	monogalatcosyldiacylglycerol palmitate delta7-desaturase (18:2(9Z,12Z)/16:1(7Z))	0	0.00076234	7.04644e-05	4.72737e-05	0	0.00076234	7.43718e-05	1	5.16638e-05	1.05337e-08	0.0157561	0	0.00076234	7.75575e-05	1	5.22208e-05	1.94617e-08	7.99529e-07	1	0	0.00137221	0.000139692	9.53487e-05	0	0.00137221	0.000136936	0	9.37683e-05	0.0109394	0.648714	0	0.00126836	0.000134431	0	9.17373e-05	6.39972e-09	0.0646241	0	0
782	0		0	0	[h] : udpgal + 12dgr1819Z160 --> udp + mgdg1819Z160 + h	Forward only	Glycerolipid metabolism	2.4.1.46	MGDGS1819Z160	monogalactosyldiacylglycerol synthase (18:1(9Z)/16:0)	0.00100293	0.00100293	0.00100293	0.00100293	0.00100293	0.00100293	0.00100293	1	0.00100293	2.60111e-293	3.91419e-231	0.00100293	0.00100293	0.00100293	1	0.00100293	0	0	1	0.00180527	0.00180527	0.00180527	0.00180527	0.00180527	0.00180527	0.00180527	1	0.00180527	3.23941e-137	4.66886e-95	0.00166864	0.00166864	0.00166864	-1	0.00166864	0	0	1	0.00331517
783	0		0	0	[h] : udpgal + 12dgr1819Z1619Z --> udp + mgdg1819Z1619Z + h	Forward only	Glycerolipid metabolism	2.4.1.46	MGDGS1819Z1619Z	monogalactosyldiacylglycerol synthase (18:1(9Z)/16:1(9Z))	1.5272e-05	1.5272e-05	1.5272e-05	1.5272e-05	1.5272e-05	1.5272e-05	1.5272e-05	1	1.5272e-05	3.34885e-172	1.83271e-184	1.5272e-05	1.5272e-05	1.5272e-05	1	1.5272e-05	0	0	1	2.74896e-05	2.74896e-05	2.74896e-05	2.74896e-05	2.74896e-05	2.74896e-05	2.74896e-05	-1	2.74896e-05	3.64675e-55	3.89265e-73	2.5409e-05	2.5409e-05	2.5409e-05	-1	2.5409e-05	0	0	1	5.04814e-05
784	1		0	0	[h] : mgdg1819Z1627Z10Z + fdxox + o2 + (4) nadph --> mgdg1819Z1637Z10Z13Z + fdxrd + (2) h2o + (4) nadp	Forward only	Glycerolipid metabolism		MGDGW3DS1819Z1637Z10Z13Z	omega-3 desaturase (18:1(9Z)/16:3(7Z,10Z,13Z)) (MGDG)	0	0.000673605	4.94624e-05	3.23191e-05	0	0.000673605	5.01173e-05	0	3.38199e-05	0.00561398	1.01039	0	0.000673605	5.13663e-05	0	3.40812e-05	0.00177586	0.168745	0	0	0.00121249	9.2965e-05	6.18396e-05	0	0.00121249	9.0463e-05	0	6.17209e-05	0.013259	0.477581	0	0.00112072	9.39427e-05	0	6.38373e-05	0.013259	0.960211	0	0
785	0		0	1	[h] : mgdg1829Z12Z1627Z10Z + fdxox + o2 + (4) nadph --> mgdg1829Z12Z1637Z10Z13Z + fdxrd + (2) h2o + (4) nadp	Forward only	Glycerolipid metabolism		MGDGW3DS1829Z12Z1637Z10Z13Z	omega-3 desaturase (18:2(9Z,12Z)/16:3(7Z,10Z,13Z)) (MGDG)	0	0.000673605	8.62366e-05	6.49396e-05	0	0.000673605	8.90394e-05	0	6.90322e-05	1.74271e-11	0.0998224	0	0.000673605	8.86341e-05	0	6.77364e-05	3.3317e-05	0.16919	0	0	0.00121249	0.000150741	0.000113314	0	0.00121249	0.000159014	1	0.000121672	1.54019e-19	0.00136992	0	0.00112072	0.000157999	1	0.000121781	7.25004e-08	0.00344812	1	0
786	0		1	0	[h] : mgdg1829Z12Z1634Z7Z10Z + fdxox + o2 + (4) nadph --> mgdg1829Z12Z1644Z7Z10Z13Z + fdxrd + (2) h2o + (4) nadp	Forward only	Glycerolipid metabolism		MGDGW3DS1829Z12Z1644Z7Z10Z13Z	omega-3 desaturase (18:2(9Z,12Z)/16:4(4Z,7Z,10Z,13Z))	0	0.000604092	5.52214e-05	4.07689e-05	0	0.000604092	7.66756e-05	1	6.33995e-05	0	3.79691e-108	0	0.000604092	7.91407e-05	1	6.4501e-05	0	2.34695e-126	1	0	0.00108737	0.000141419	0.000116393	0	0.00108737	0.00014013	0	0.000116907	0.0865876	0.959596	0	0.00100507	0.000130449	0	0.00010698	4.55609e-22	7.10243e-10	0	0
787	0		0	1	[h] : mgdg1829Z12Z160 + fdxox + o2 + (4) nadph --> mgdg1839Z12Z15Z160 + fdxrd + (2) h2o + (4) nadp	Forward only	Glycerolipid metabolism		MGDGW3DS1839Z12Z15Z160	omega-3 desaturase (18:3(9Z,12Z,15Z)/16:0) (MGDG)	0	3.83195e-06	3.17796e-06	3.32041e-06	0	3.83195e-06	3.1936e-06	0	3.34078e-06	0.000820928	0.240226	0	3.83195e-06	3.12445e-06	0	3.27701e-06	5.40393e-11	3.19896e-08	0	0	6.89751e-06	5.76918e-06	6.06306e-06	0	6.89751e-06	5.7158e-06	-1	6.02268e-06	2.81185e-10	0.00457802	0	6.37547e-06	5.17182e-06	-1	5.42454e-06	0	1.54e-278	1	0
788	0		0	1	[h] : mgdg1829Z12Z1627Z10Z + fdxox + o2 + (4) nadph --> mgdg1839Z12Z15Z1627Z10Z + fdxrd + (2) h2o + (4) nadp	Forward only	Glycerolipid metabolism		MGDGW3DS1839Z12Z15Z1627Z10Z	omega-3 desaturase (18:3(9Z,12Z,15Z)/16:2(7Z,10Z)) (MGDG)	0	0.000673605	0.000316001	0.000311755	0	0.000673605	0.000327975	0	0.000314619	4.08471e-12	1.02345e-08	0	0.000673605	0.000311232	0	0.000301295	8.69567e-07	0.0554801	0	0	0.00121249	0.000196866	0.000151449	0	0.00121249	0.000555008	1	0.000525524	0	0	0	0.00112072	0.000492071	1	0.000470973	0	0	1	0
789	0		0	0	[h] : mgdg1829Z12Z1634Z7Z10Z + fdxox + o2 + (4) nadph --> mgdg1839Z12Z15Z1634Z7Z10Z + fdxrd + (2) h2o + (4) nadp	Forward only	Glycerolipid metabolism		MGDGW3DS1839Z12Z15Z1634Z7Z10Z	omega-3 desaturase (18:3(9Z,12Z,15Z)/16:3(4Z,7Z,10Z)) (MGDG)	0	0.000604092	7.76621e-05	6.45412e-05	0	0.000604092	5.92881e-05	-1	4.38228e-05	1.1036e-301	6.76419e-79	0	0.000604092	6.02341e-05	-1	4.35655e-05	1.44193e-306	1.47124e-67	1	0	0.00108737	0.000101894	7.52802e-05	0	0.00108737	0.000140695	1	0.000117498	0	3.42226e-104	0	0.00100507	0.000108118	1	8.01866e-05	4.97627e-09	0.00131795	1	0
790	1		0	0	[h] : mgdg1829Z12Z1637Z10Z13Z + fdxox + o2 + (4) nadph --> mgdg1839Z12Z15Z1637Z10Z13Z + fdxrd + (2) h2o + (4) nadp	Forward only	Glycerolipid metabolism		MGDGW3DS1839Z12Z15Z1637Z10Z13Z1	omega-3 desaturase (18:3(9Z,12Z,15Z)/16:3(7Z,10Z,13Z)) (MGDG)	0	0.000604092	7.32371e-05	5.40982e-05	0	0.000604092	7.267e-05	0	5.4505e-05	0.183603	1.13267	0	0.000604092	7.84403e-05	0	5.82139e-05	1.29711e-07	3.35545e-05	0	0	0.00108737	0.000130637	9.75566e-05	0	0.00108737	0.000133774	0	0.000102648	3.60352e-07	0.350099	0	0.00100507	0.000131848	0	0.00010103	9.14861e-05	0.894649	0	0
791	0		1	0	[h] : mgdg1839Z12Z15Z1627Z10Z + fdxox + o2 + (4) nadph --> mgdg1839Z12Z15Z1637Z10Z13Z + fdxrd + (2) h2o + (4) nadp	Forward only	Glycerolipid metabolism		MGDGW3DS1839Z12Z15Z1637Z10Z13Z2	omega-3 desaturase (18:3(9Z,12Z,15Z)/16:3(7Z,10Z,13Z)) (MGDG)	0	0.000604092	0.000270724	0.000259991	0	0.000604092	0.000263026	-1	0.000249718	1.15574e-05	0.000236121	0	0.000604092	0.00024318	-1	0.000234018	5.1355e-27	3.95787e-44	1	0	0.00108737	0.000471613	0.000443527	0	0.00108737	0.00047679	0	0.000446562	0.236861	0.334942	0	0.00100507	0.000382569	0	0.000368688	2.06201e-150	3.60671e-151	0	0
792	1		0	0	[h] : mgdg1829Z12Z1644Z7Z10Z13Z + fdxox + o2 + (4) nadph --> mgdg1839Z12Z15Z1644Z7Z10Z13Z + fdxrd + (2) h2o + (4) nadp	Forward only	Glycerolipid metabolism		MGDGW3DS1839Z12Z15Z1644Z7Z10Z13Z1	omega-3 desaturase (18:3(9Z,12Z,15Z)/16:4(4Z,7Z,10Z,13Z)) (MGDG)	0	0.000542285	0.000108418	8.8258e-05	0	0.000542285	0.000108781	0	8.75748e-05	0.0635969	1.32362	0	0.000542285	0.000110741	0	8.90122e-05	0.100485	0.227093	0	0	0.000976112	0.000195864	0.00015374	0	0.000976112	0.000193286	0	0.000148305	0.146806	0.706216	0	0.000902235	0.000200343	0	0.00016329	0.00030842	0.13735	0	0
793	0		0	0	[h] : mgdg1839Z12Z15Z1637Z10Z13Z + fdxox + o2 + (4) nadph --> mgdg1839Z12Z15Z1644Z7Z10Z13Z + fdxrd + (2) h2o + (4) nadp	Forward only	Glycerolipid metabolism		MGDGW3DS1839Z12Z15Z1644Z7Z10Z13Z2	omega-3 desaturase (18:3(9Z,12Z,15Z)/16:4(4Z,7Z,10Z,13Z)) (MGDG)	0	0.000542285	0.000304386	0.000306868	0	0.000542285	0.000297332	-1	0.000295764	5.81526e-05	0.000217291	0	0.000542285	0.000285849	-1	0.000280906	9.90064e-19	8.85626e-25	1	0	0.000976112	0.000530931	0.000520762	0	0.000976112	0.000541797	1	0.000534806	0.00425103	0.00181375	0	0.000902235	0.000453746	-1	0.000440345	7.3228e-91	2.65268e-134	1	0
794	0		0	0	[h] : mgdg1819Z1617Z + fdxox + o2 + (4) nadph --> mgdg1819Z1627Z10Z + fdxrd + (2) h2o + (4) nadp	Forward only	Glycerolipid metabolism		MGDGW6DS1819Z1627Z10Z	omega-6 desaturase (18:1(9Z)/16:2(7Z,10Z)) (MGDG)	0	0.000758508	0.000102523	7.82923e-05	0	0.000758508	0.000108693	0	8.27451e-05	4.13284e-14	0.000359368	0	0.000758508	0.000101357	0	7.4936e-05	0.0368199	0.835753	0	0	0.00136531	0.000193032	0.00014232	0	0.00136531	0.000188872	0	0.000140353	0.00736639	0.388528	0	0.00126198	0.000198648	0	0.000154681	1.84032e-06	0.093861	0	0
795	0		1	0	[h] : mgdg1819Z160 + fdxox + o2 + (4) nadph --> mgdg1829Z12Z160 + fdxrd + (2) h2o + (4) nadp	Forward only	Glycerolipid metabolism		MGDGW6DS1829Z12Z160	omega-6 desaturase (18:2(9Z,12Z)/16:0) (MGDG)	0	0.000769994	5.83144e-05	3.79732e-05	0	0.000769994	6.31711e-05	1	4.34453e-05	5.56446e-22	0.000274067	0	0.000769994	6.34002e-05	1	4.13515e-05	6.44599e-08	9.9771e-05	1	0	0.00138599	0.000113036	7.63171e-05	0	0.00138599	0.000115525	0	7.95217e-05	0.0012135	0.634511	0	0.00128109	0.000106478	0	6.99543e-05	3.45558e-16	0.00517896	0	0
796	0		0	0	[h] : mgdg1819Z1617Z + fdxox + o2 + (4) nadph --> mgdg1829Z12Z1617Z + fdxrd + (2) h2o + (4) nadp	Forward only	Glycerolipid metabolism		MGDGW6DS1829Z12Z1617Z	omega-6 desaturase (18:2(9Z,12Z)/16:1(7Z)) (MGDG)	0	0.00076234	0.000314971	0.000301732	0	0.00076234	0.000323217	1	0.000304926	2.48084e-08	0.00189737	0	0.00076234	0.000300398	-1	0.000286861	5.94705e-15	4.58345e-09	1	0	0.00137221	0.000121022	7.95654e-05	0	0.00137221	0.00058172	1	0.000539991	0	0	0	0.00126836	0.000464249	1	0.000447544	0	0	1	0
797	0		0	0	[h] : mgdg1819Z1619Z + fdxox + o2 + (4) nadph --> mgdg1829Z12Z1619Z + fdxrd + (2) h2o + (4) nadp	Forward only	Glycerolipid metabolism		MGDGW6DS1829Z12Z1619Z	omega-6 desaturase (18:2(9Z,12Z)/16:1(9Z)) (MGDG)	0	3.83195e-06	3.07899e-06	3.22764e-06	0	3.83195e-06	3.04371e-06	-1	3.19804e-06	0.000109357	0.00133278	0	3.83195e-06	2.95057e-06	-1	3.10541e-06	4.45566e-29	1.10375e-35	1	0	6.89751e-06	5.48876e-06	5.79262e-06	0	6.89751e-06	5.53511e-06	1	5.84162e-06	0.00488913	0.0329221	0	6.37547e-06	4.94453e-06	-1	5.19549e-06	3.32859e-308	5.21287e-201	1	0
798	0		0	0	[h] : mgdg1819Z1627Z10Z + fdxox + o2 + (4) nadph --> mgdg1829Z12Z1627Z10Z + fdxrd + (2) h2o + (4) nadp	Forward only	Glycerolipid metabolism		MGDGW6DS1829Z12Z1627Z10Z1	omega-6 desaturase (18:2(9Z,12Z)/16:2(7Z,10Z)) (MGDG)	0	0.000758508	7.58307e-05	5.25121e-05	0	0.000758508	7.9635e-05	0	5.75528e-05	1.08197e-10	0.0198719	0	0.000758508	7.49792e-05	0	5.19463e-05	0.110744	0.932381	0	0	0.00136531	0.000141459	9.81256e-05	0	0.00136531	0.000142184	0	0.000102025	6.44599e-08	1.31023	0	0.00126198	0.000150096	0	0.000107531	5.72881e-08	0.00131947	0	0
799	0		0	1	[h] : mgdg1829Z12Z1617Z + fdxox + o2 + (4) nadph --> mgdg1829Z12Z1627Z10Z + fdxrd + (2) h2o + (4) nadp	Forward only	Glycerolipid metabolism		MGDGW6DS1829Z12Z1627Z10Z2	omega-6 desaturase (18:2(9Z,12Z)/16:2(7Z,10Z)) (MGDG)	0	0.000758508	0.000410749	0.000415643	0	0.000758508	0.000422903	0	0.000420504	1.0695e-12	3.7764e-07	0	0.000758508	0.000407493	0	0.000402631	1.40615e-05	0.372985	0	0	0.00136531	0.000311943	0.000254216	0	0.00136531	0.0007676	1	0.00075794	0	0	0	0.00126198	0.000645978	1	0.000631134	0	0	1	0
800	0		0	0	[h] : mgdg1819Z1637Z10Z13Z + fdxox + o2 + (4) nadph --> mgdg1829Z12Z1637Z10Z13Z + fdxrd + (2) h2o + (4) nadp	Forward only	Glycerolipid metabolism		MGDGW6DS1829Z12Z1637Z10Z13Z	omega-6 desaturase (18:2(9Z,12Z)/16:3(7Z,10Z,13Z)) (MGDG)	0	0.000673605	6.3867e-05	5.1927e-05	0	0.000673605	3.95531e-05	-1	2.51328e-05	0	9.67353e-146	0	0.000673605	4.09605e-05	-1	2.57443e-05	0	3.66324e-127	1	0	0.00121249	7.67927e-05	5.06312e-05	0	0.00121249	6.82059e-05	-1	4.53444e-05	9.55958e-16	9.80226e-07	0	0.00112072	7.19698e-05	-1	4.61417e-05	1.45742e-13	0.00705734	1	0
801	0		0	1	[h] : mgdg1819Z1644Z7Z10Z13Z + fdxox + o2 + (4) nadph --> mgdg1829Z12Z1644Z7Z10Z13Z + fdxrd + (2) h2o + (4) nadp	Forward only	Glycerolipid metabolism		MGDGW6DS1829Z12Z1644Z7Z10Z13Z	omega-6 desaturase (18:2(9Z,12Z)/16:4(4Z,7Z,10Z,13Z))	0	0.000604092	2.14738e-05	1.28007e-05	0	0.000604092	2.28387e-05	0	1.42736e-05	1.57255e-09	0.108219	0	0.000604092	2.30273e-05	0	1.35853e-05	0.00131057	0.0419237	0	0	0.00108737	3.9285e-05	2.37619e-05	0	0.00108737	4.28627e-05	1	2.697e-05	8.7001e-17	0.0104205	0	0.00100507	4.38264e-05	1	2.6571e-05	3.16225e-13	0.000228105	1	0
802	1		0	0	[c] : pa16018111Z + h2o --> 12dgr16018111Z + pi	Forward only	Glycerolipid metabolism	3.1.3.4	PAPA16018111Z	phosphatidate phosphatase (16:0/18:1(11Z))	0.000149817	0.0331983	0.00017982	0.000158045	0.000149817	0.0331983	0.000167617	0	0.000154917	1.59487e-121	0.0286979	0.000149817	0.0331983	0.000169426	0	0.000156554	5.14391e-41	0.0905445	0	0.000269671	0.0605819	0.000316966	0.000286142	0.000269671	0.0605819	0.000313562	0	0.000286035	0.091029	1.22459	0.000249261	0.0959042	0.000357105	0	0.000283544	8.19859e-210	0.00361929	0	0.000495221
803	0		1	0	[c] : pa1601819Z + h2o --> 12dgr1601819Z + pi	Forward only	Glycerolipid metabolism	3.1.3.4	PAPA1601819Z	phosphatidate phosphatase (16:0/18:1(9Z))	0.000285269	0.0333337	0.000451005	0.000370967	0.000285269	0.0333337	0.000432491	-1	0.000334532	7.76326e-102	0.00515126	0.000285269	0.0333337	0.000316774	-1	0.00029779	0	1.10053e-147	1	0.000513485	0.0608257	0.00061249	0.000561106	0.000513485	0.0608257	0.000634373	0	0.000575656	3.52656e-63	0.0739952	0.000474621	0.0968658	0.000565491	0	0.000507437	0	0.000281485	0	0.000942956
804	0		0	1	[h] : pa1601819Z + h2o --> 12dgr1601819Z + pi	Forward only	Glycerolipid metabolism	3.1.3.4	PAPA1601819Zh	phosphatidate phosphatase (16:0/18:1(9Z)), chloroplast	0	6.64681	0.0118308	0.00428675	0	6.64681	0.0124635	0	0.00532959	7.67958e-24	1.10401	0	0.475542	0.000578599	0	0.000176561	0	5.06524e-42	0	0	7.99392	0.0110986	0.00445295	0	7.99392	0.0165693	1	0.00676344	1.1984e-86	0.00209706	0	0.0956549	7.43645e-05	-1	1.80539e-05	0	8.52562e-32	1	0
805	0		1	0	[h] : pa160 + h2o --> 12dgr160 + pi	Forward only	Glycerolipid metabolism	3.1.3.4	PAPA160h	Phosphatidate phosphatase (n-C16:0)	4.66124e-05	6.64686	0.00949835	0.0039952	4.66124e-05	6.64686	0.0159524	1	0.00731333	7.0806e-180	4.58981e-08	4.66124e-05	0.475589	0.000759963	-1	0.000270005	0	7.99302e-32	1	8.39024e-05	7.994	0.0133473	0.00502289	8.39024e-05	7.994	0.010512	0	0.00474001	3.3317e-05	0.0736743	7.75522e-05	0.0957325	0.000126186	0	8.93191e-05	0	1.67165e-43	0	0.000154077
806	1		0	0	[c] : pa1801819Z + h2o --> 12dgr1801819Z + pi	Forward only	Glycerolipid metabolism	3.1.3.4	PAPA1801819Z	phosphatidate phosphatase (18:0/18:1(9Z))	0.000200797	0.0332492	0.000234556	0.000210623	0.000200797	0.0332492	0.000242544	0	0.000216366	2.71505e-158	0.385245	0.000200797	0.0332492	0.000230681	0	0.00021089	0.041205	0.829593	0	0.000361435	0.0606737	0.000407327	0.000376493	0.000361435	0.0606737	0.000428562	0	0.00038281	1.504e-69	0.10951	0.00033408	0.095989	0.000412735	0	0.000360419	0	1.04151	0	0.000663734
807	1	0	0	0	[h] : pa1801819Z + h2o --> 12dgr1801819Z + pi	Forward only	Glycerolipid metabolism	3.1.3.4	PAPA1801819Zh	phosphatidate phosphatase (18:0/18:1(9Z)), chloroplast	0	6.64681	0.0146518	0.00558086	0	6.64681	0.012183	0	0.00541045	0.508922	0.19117	0	0.475542	0.000450855	0	0.000138273	0	7.20632e-40	0	0	7.99392	0.010861	0.00414473	0	7.99392	0.0130996	0	0.00483678	6.79275e-13	0.404762	0	0.0956549	4.11108e-05	0	1.37534e-05	0	1.22872e-29	0	0
808	1		0	0	[c] : pa18111Z18111Z + h2o --> 12dgr18111Z18111Z + pi	Forward only	Glycerolipid metabolism	3.1.3.4	PAPA181	phosphatidate phosphatase (18:1(11Z)/18:1(11Z))	0.000145377	0.0331938	0.00017258	0.000154092	0.000145377	0.0331938	0.000164862	0	0.000149918	4.25301e-260	0.342311	0.000145377	0.0331938	0.000167624	0	0.000153024	1.54019e-19	0.612188	0	0.000261679	0.0605739	0.000311103	0.000278622	0.000261679	0.0605739	0.000315745	0	0.000281492	5.98393e-20	1.08588	0.000241873	0.0958968	0.000289377	0	0.000255084	0	0.0359966	0	0.000480543
809	1		0	0	[h] : pa18111Z160 + h2o --> 12dgr18111Z160 + pi	Forward only	Glycerolipid metabolism	3.1.3.4	PAPA18111Z160h	phosphatidate phosphatase (18:1(11Z)/16:0)	5.43446e-05	6.64687	0.0137273	0.0051041	5.43446e-05	6.64687	0.0129982	0	0.00538903	0.000283516	1.08717	5.43446e-05	0.475597	0.000790352	0	0.000279649	0	1.8735e-38	0	9.78203e-05	7.99402	0.0139889	0.00587263	9.78203e-05	7.99402	0.0128895	0	0.00573269	0.691741	0.913525	9.04167e-05	0.0957454	0.000164795	0	0.000104556	0	3.86866e-35	0	0.000179636
810	1		0	0	[c] : pa18111Z1819Z + h2o --> 12dgr18111Z1819Z + pi	Forward only	Glycerolipid metabolism	3.1.3.4	PAPA18111Z1819Z	phosphatidate phosphatase (18:1(11Z)/18:1(9Z))	0.000223701	0.0332721	0.000244939	0.000230405	0.000223701	0.0332721	0.000251633	0	0.000233222	5.38618e-87	0.430335	0.000223701	0.0332721	0.000247809	0	0.000230863	0.000100043	0.987464	0	0.000402662	0.0607149	0.000444648	0.000416377	0.000402662	0.0607149	0.000443789	0	0.000418391	4.26154e-18	1.43185	0.000372186	0.0960271	0.00044367	0	0.00039531	0	1.41931	0	0.000739443
811	1		0	0	[h] : pa18111Z1819Z + h2o --> 12dgr18111Z1819Z + pi	Forward only	Glycerolipid metabolism	3.1.3.4	PAPA18111Z1819Zh	phosphatidate phosphatase (18:1(11Z)/18:1(9Z)), chloroplast	0	6.64681	0.0119514	0.00470504	0	6.64681	0.0117442	0	0.00422734	1.19193e-08	1.40461	0	0.475542	0.000598371	0	0.000172641	0	2.1673e-41	0	0	7.99392	0.0135855	0.00537542	0	7.99392	0.0129999	0	0.00563178	0.0150422	1.18328	0	0.0956549	4.72883e-05	0	1.22802e-05	0	2.53072e-43	0	0
812	1		0	0	[h] : pa1819Z160 + h2o --> 12dgr1819Z160 + pi	Forward only	Glycerolipid metabolism	3.1.3.4	PAPA1819Z160h	phosphatidate phosphatase (18:1(9Z)/16:0)	0.00117645	6.64799	0.0156805	0.00668254	0.00117645	6.64799	0.0149542	0	0.00653738	0.432471	1.08452	0.00117645	0.476719	0.00151929	0	0.00129415	0	6.24933e-54	0	0.00211761	7.99604	0.0161611	0.00757891	0.00211761	7.99604	0.0158576	0	0.00752975	0.773915	1.37968	0.00195734	0.0976123	0.00200981	0	0.00196812	0	1.04371e-45	0	0.00388876
813	0		0	1	[h] : pa1819Z1619Z + h2o --> 12dgr1819Z1619Z + pi	Forward only	Glycerolipid metabolism	3.1.3.4	PAPA1819Z1619Zh	phosphatidate phosphatase (18:1(9Z)/16:1(9Z))	1.5272e-05	6.64683	0.00995952	0.00378654	1.5272e-05	6.64683	0.0120147	0	0.00434065	6.21384e-11	0.304779	1.5272e-05	0.475558	0.000365344	0	0.000119675	0	7.25326e-31	0	2.74896e-05	7.99395	0.0106213	0.00400968	2.74896e-05	7.99395	0.0207849	1	0.00782747	2.17215e-176	7.5121e-08	2.5409e-05	0.0956803	0.00010362	-1	4.17081e-05	0	2.35063e-43	1	5.04814e-05
814	1		0	0	[c] : pa1819Z18111Z + h2o --> 12dgr1819Z18111Z + pi	Forward only	Glycerolipid metabolism	3.1.3.4	PAPA1819Z18111Z	phosphatidate phosphatase (18:1(9Z)/18:1(11Z))	0.000153208	0.0332017	0.000174716	0.000158704	0.000153208	0.0332017	0.000170355	0	0.00015768	4.12945e-33	0.773844	0.000153208	0.0332017	0.000175192	0	0.000158662	2.52241e-06	1.42731	0	0.000275774	0.060588	0.000304812	0.000283631	0.000275774	0.060588	0.000317144	0	0.000288093	1.95802e-114	0.404762	0.000254902	0.0959098	0.000289491	0	0.0002675	0	0.158441	0	0.000506427
815	0		1	0	[h] : pa1819Z18111Z + h2o --> 12dgr1819Z18111Z + pi	Forward only	Glycerolipid metabolism	3.1.3.4	PAPA1819Z18111Zh	phosphatidate phosphatase (18:1(9Z)/18:1(11Z)), chloroplast	0	6.64681	0.0130892	0.0046952	0	6.64681	0.0170622	1	0.00654512	1.5405e-45	0.0333571	0	0.475542	0.000562105	-1	0.000173613	0	2.42053e-40	1	0	7.99392	0.0116149	0.00460086	0	7.99392	0.014379	0	0.00640237	1.1199e-59	0.146711	0	0.0956549	3.76382e-05	0	1.29184e-05	0	1.24199e-32	0	0
816	1		0	0	[c] : pa1819Z1819Z + h2o --> 12dgr1819Z1819Z + pi	Forward only	Glycerolipid metabolism	3.1.3.4	PAPA1819Z1819Z	phosphatidate phosphatase (18:1(9Z)/18:1(9Z))	0.00024384	0.0332923	0.000276117	0.000256089	0.00024384	0.0332923	0.000276868	0	0.000257781	2.60896e-25	1.41663	0.00024384	0.0332923	0.000276182	0	0.000253859	8.73753e-39	1.49708	0	0.000438912	0.0607512	0.000508597	0.000467013	0.000438912	0.0607512	0.000508676	0	0.000469259	3.44482e-06	1.49823	0.000405693	0.0964287	0.000539989	0	0.000449585	0	0.10212	0	0.000806013
817	1		0	0	[h] : pa1819Z1819Z + h2o --> 12dgr1819Z1819Z + pi	Forward only	Glycerolipid metabolism	3.1.3.4	PAPA1819Z1819Zh	phosphatidate phosphatase (18:1(9Z)/18:1(9Z)), chloroplast	0	6.64681	0.0123085	0.00437889	0	6.64681	0.0146075	0	0.0063734	6.38484e-64	0.231279	0	0.475542	0.000725058	0	0.000189746	0	2.5793e-33	0	0	7.99392	0.0133645	0.00533556	0	7.99392	0.0150548	0	0.00682694	2.69387e-34	0.587032	0	0.0956549	5.8209e-05	0	1.48514e-05	0	9.73683e-39	0	0
818	0		0	0	[c] : pe1801829Z12Z + o2 + (2) nadh --> pe1801835Z9Z12Z + (2) h2o + (2) nad	Forward only	Glycerolipid metabolism	1.14.19.-	PED5DS1801835Z9Z12Z	delta5 desaturase (18:0/18:3(5Z,9Z,12Z))	0	0.000643658	0.000166177	0.000151575	0	0.000643658	0.000349988	1	0.000353798	0	0	0	0.000643658	0.000340598	1	0.00034198	0	0	1	0	0.00115858	0.000307305	0.000282705	0	0.00115858	0.000301237	-1	0.000273795	0.00396153	0.015527	0	0.0010709	0.000425158	1	0.000426672	0	0	1	0
819	0		0	0	[c] : pe18111Z1829Z12Z + o2 + (2) nadh --> pe18111Z1835Z9Z12Z + (2) h2o + (2) nad	Forward only	Glycerolipid metabolism	1.14.19.-	PED5DS18111Z1835Z9Z12Z	delta5 desaturase (18:1(11Z)/18:3(5Z,9Z,12Z)) (PE)	0	0.000643658	0.000359778	0.000364666	0	0.000643658	0.000174517	-1	0.000160855	0	0	0	0.000643658	0.000179251	-1	0.000167369	0	0	1	0	0.00115858	0.000313387	0.000288388	0	0.00115858	0.000644343	1	0.000652301	0	0	0	0.0010709	0.000433115	1	0.000433669	0	0	1	0
820	0		0	1	[c] : pe1819Z1829Z12Z + o2 + (2) nadh --> pe1819Z1835Z9Z12Z + (2) h2o + (2) nad	Forward only	Glycerolipid metabolism	1.14.19.-	PED5DS1819Z1835Z9Z12Z	delta5 desaturase (18:1(9Z)/18:3(5Z,9Z,12Z)) (PE)	0	0.000643658	0.000117703	0.000104655	0	0.000643658	0.000119153	0	0.00010604	0.0542081	0.531132	0	0.000643658	0.000123809	0	0.000109956	3.10616e-06	1.41081e-06	0	0	0.00115858	0.000537893	0.000543289	0	0.00115858	0.000213005	-1	0.000185964	0	0	0	0.0010709	0.000212623	-1	0.000193273	0	0	1	0
821	0		0	0	[c] : pe1801819Z + o2 + (2) nadh --> pe1801829Z12Z + (2) h2o + (2) nad	Forward only	Glycerolipid metabolism	1.14.19.-	PEDS1801829Z12Z	oleate desaturase (18:0/18:2(9Z,12Z))	0	0.000643658	0.0001663	0.00015162	0	0.000643658	0.000349953	1	0.000353844	0	0	0	0.000643658	0.00034075	1	0.000342393	0	0	1	0	0.00115858	0.00030727	0.000282532	0	0.00115858	0.000301497	-1	0.000273936	0.00643594	0.0238131	0	0.0010709	0.000425057	1	0.000426615	0	0	1	0
822	0		0	0	[c] : pe1801835Z9Z12Z + o2 + (2) nadh --> pe1801845Z9Z12Z15Z + (2) h2o + (2) nad	Forward only	Glycerolipid metabolism	1.14.19.-	PEDS1801845Z9Z12Z15Z	linoleate desaturase (18:0/18:4(5Z,9Z,12Z,15Z))	0	0.000274841	6.66154e-05	5.6889e-05	0	0.000274841	0.000158826	1	0.000158915	0	0	0	0.000274841	0.000152905	1	0.000150704	0	0	1	0	0.000494715	0.000124799	0.00010343	0	0.000494715	0.000121862	0	0.000100344	0.0124407	0.0642063	0	0.000457272	0.00012622	0	0.000109116	2.27986e-05	0.433414	0	0
823	0		0	0	[c] : pe18111Z1819Z + o2 + (2) nadh --> pe18111Z1829Z12Z + (2) h2o + (2) nad	Forward only	Glycerolipid metabolism	1.14.19.-	PEDS18111Z1829Z12Z	oleate desaturase (18:1(11Z)/18:2(9Z,12Z)) (PE)	0	0.000643658	0.000359489	0.00036438	0	0.000643658	0.000174391	-1	0.000160599	0	0	0	0.000643658	0.00017919	-1	0.000167335	0	0	1	0	0.00115858	0.000313333	0.000288364	0	0.00115858	0.000643554	1	0.000651999	0	0	0	0.0010709	0.00043276	1	0.000433238	0	0	1	0
824	0		0	0	[c] : pe18111Z1835Z9Z12Z + o2 + (2) nadh --> pe18111Z1845Z9Z12Z15Z + (2) h2o + (2) nad	Forward only	Glycerolipid metabolism	1.14.19.-	PEDS18111Z1845Z9Z12Z15Z	linoleate desaturase (18:1(11Z)/18:4(5Z,9Z,12Z,15Z)) (PE)	0	0.000274841	0.000152709	0.000154837	0	0.000274841	5.89452e-05	-1	4.82858e-05	0	0	0	0.000274841	6.18534e-05	-1	5.16528e-05	0	0	1	0	0.000494715	0.000107177	8.61741e-05	0	0.000494715	0.000270515	1	0.000270265	0	0	0	0.000457272	0.000230506	1	0.000225994	0	0	1	0
825	0		0	1	[c] : pe1819Z1819Z + o2 + (2) nadh --> pe1819Z1829Z12Z + (2) h2o + (2) nad	Forward only	Glycerolipid metabolism	1.14.19.-	PEDS1819Z1829Z12Z	oleate desaturase (18:1(9Z)/18:2(9Z,12Z)) (PE)	0	0.000643658	0.000117427	0.000104414	0	0.000643658	0.000119037	0	0.000105817	0.0486343	0.430335	0	0.000643658	0.00012341	0	0.000109694	2.79967e-06	2.27131e-06	0	0	0.00115858	0.000537336	0.000542672	0	0.00115858	0.000212786	-1	0.000185619	0	0	0	0.0010709	0.000212477	-1	0.000193053	0	0	1	0
826	0		0	1	[c] : pe1819Z1835Z9Z12Z + o2 + (2) nadh --> pe1819Z1845Z9Z12Z15Z + (2) h2o + (2) nad	Forward only	Glycerolipid metabolism	1.14.19.-	PEDS1819Z1845Z9Z12Z15Z	linoleate desaturase (18:1(9Z)/18:4(5Z,9Z,12Z,15Z)) (PE)	0	0.000274841	5.55172e-05	4.58224e-05	0	0.000274841	5.70703e-05	0	4.65348e-05	0.000201639	0.0762328	0	0.000274841	6.00831e-05	0	4.96084e-05	4.02865e-07	1.73501e-10	0	0	0.000494715	0.000262739	0.000259853	0	0.000494715	0.000102338	-1	8.04574e-05	0	0	0	0.000457272	0.000100546	-1	8.46246e-05	0	0	1	0
827	1		0	0	[c] : pe1819Z1835Z9Z12Z + o2 + (2) nadh --> pe1829Z12Z1835Z9Z12Z + (2) h2o + (2) nad	Forward only	Glycerolipid metabolism	1.14.19.-	PEDS1829Z12Z1835Z9Z12Z	oleate desaturase (18:2(9Z,12Z)/18:3(5Z,9Z,12Z)) (PE)	3.74642e-06	0.000647404	4.18803e-06	3.82207e-06	3.74642e-06	0.000647404	4.02318e-06	0	3.81732e-06	1.70492e-30	0.262838	3.74642e-06	0.000647404	4.05496e-06	0	3.81078e-06	9.97296e-27	0.419295	0	6.74356e-06	0.00116533	7.3881e-06	6.89814e-06	6.74356e-06	0.00116533	7.49057e-06	0	6.94787e-06	8.87461e-29	0.989526	6.23318e-06	0.00107713	6.83669e-06	0	6.35258e-06	0	0.00178693	0	1.23838e-05
828	1		0	0	[c] : pa18111Z160 + 12dgr16018111Z --> 1odec11eg3p + tag16018111Z160	Forward only	Glycerolipid metabolism	2.3.1.158	PLDAGAT16018111Z1601	phospholipid: diacylglycerol acyltransferase (16:0)	0	0.0195104	0.000110439	6.04127e-05	0	0.0195104	0.000104932	0	5.97688e-05	0.0743419	0.505115	0	0.0195104	0.000123994	0	6.90801e-05	1.03516e-16	0.00562081	0	0	0.0355312	0.000172655	8.93816e-05	0	0.0355312	0.000191939	0	0.000117177	3.6369e-52	0.050388	0	0.0529799	0.000202926	0	0.000109552	5.47563e-28	0.00194159	0	0
829	1		0	0	[c] : pa1819Z160 + 12dgr16018111Z --> 1odec9eg3p + tag16018111Z160	Forward only	Glycerolipid metabolism	2.3.1.158	PLDAGAT16018111Z1602	phospholipid: diacylglycerol acyltransferase (16:0)	0	0.0195104	9.60567e-05	5.00729e-05	0	0.0195104	9.91212e-05	0	5.58188e-05	3.4018e-09	0.806696	0	0.0195104	9.76186e-05	0	4.87157e-05	0.267496	1.16313	0	0	0.0355312	0.00018011	9.72646e-05	0	0.0355312	0.000182337	0	0.000102879	0.0124407	1.30175	0	0.0529799	0.000171468	0	9.41544e-05	0.0486343	0.361215	0	0
830	0		0	1	[c] : pa16018111Z + 12dgr16018111Z --> 1hdecg3p + tag16018111Z18111Z	Forward only	Glycerolipid metabolism	2.3.1.158	PLDAGAT16018111Z18111Z1	phospholipid: diacylglycerol acyltransferase (18:1(11Z))	0	0.0165488	2.01878e-05	1.55881e-05	0	0.0165488	2.18515e-05	0	1.54091e-05	1.8814e-05	0.957129	0	0.0165488	6.30257e-06	0	4.27983e-06	0	4.84005e-17	0	0	0.0302003	1.11601e-05	7.59457e-06	0	0.0302003	1.73853e-05	1	9.91889e-06	1.08556e-72	0.0195948	0	0.0478683	3.84736e-05	1	2.55446e-05	0	6.39189e-14	1	0
831	0		0	0	[c] : pa18111Z18111Z + 12dgr16018111Z --> 1odec11eg3p + tag16018111Z18111Z	Forward only	Glycerolipid metabolism	2.3.1.158	PLDAGAT16018111Z18111Z2	phospholipid: diacylglycerol acyltransferase (18:1(11Z))	0	0.0165488	7.49272e-06	4.18223e-06	0	0.0165488	1.1844e-05	0	4.78605e-06	2.23022e-21	0.159479	0	0.0165488	8.89785e-06	0	4.60629e-06	2.99429e-09	0.769772	0	0	0.0302003	1.42643e-05	7.94846e-06	0	0.0302003	2.58415e-05	0	1.09685e-05	2.50261e-70	0.0177151	0	0.0478683	1.43948e-05	0	9.20211e-06	1.76025e-23	1.44529	0	0
832	0		0	0	[c] : pa1819Z18111Z + 12dgr16018111Z --> 1odec9eg3p + tag16018111Z18111Z	Forward only	Glycerolipid metabolism	2.3.1.158	PLDAGAT16018111Z18111Z3	phospholipid: diacylglycerol acyltransferase (18:1(11Z))	0	0.0165488	8.11602e-06	4.00546e-06	0	0.0165488	8.27374e-06	0	4.54913e-06	1.77095e-24	1.46732	0	0.0165488	7.54183e-06	0	4.65318e-06	2.99044e-26	1.20537	0	0	0.0302003	1.51062e-05	7.96949e-06	0	0.0302003	1.69073e-05	0	9.91021e-06	1.39044e-71	1.0791	0	0.0478683	3.20941e-05	0	1.26087e-05	2.0238e-156	0.00405298	0	0
833	1		0	0	[c] : pa1601819Z + 12dgr16018111Z --> 1hdecg3p + tag16018111Z1819Z	Forward only	Glycerolipid metabolism	2.3.1.158	PLDAGAT16018111Z1819Z1	phospholipid: diacylglycerol acyltransferase (18:1(9Z))	0	0.0178763	2.91334e-05	1.41564e-05	0	0.0178763	3.26424e-05	0	1.57112e-05	4.51949e-08	0.303166	0	0.0178763	3.02449e-05	0	1.45066e-05	0.100485	1.06336	0	0	0.0325899	6.25073e-05	3.11302e-05	0	0.0325899	5.5423e-05	0	2.8748e-05	1.84032e-06	0.22852	0	0.050077	6.23038e-05	0	2.88632e-05	7.64125e-05	1.45973	0	0
834	0		1	0	[c] : pa1801819Z + 12dgr16018111Z --> 1odecg3p + tag16018111Z1819Z	Forward only	Glycerolipid metabolism	2.3.1.158	PLDAGAT16018111Z1819Z2	phospholipid: diacylglycerol acyltransferase (18:1(9Z))	0	0.0178763	4.06738e-05	2.45663e-05	0	0.0178763	3.03752e-05	-1	1.6047e-05	3.4416e-139	4.1375e-06	0	0.0178763	2.88708e-05	-1	1.41149e-05	3.79547e-231	2.28268e-06	1	0	0.0325899	5.42155e-05	2.6867e-05	0	0.0325899	6.4293e-05	0	3.30891e-05	1.43145e-23	0.110458	0	0.050077	5.65246e-05	0	2.82673e-05	0.000100043	1.00302	0	0
835	1		0	0	[c] : pa18111Z1819Z + 12dgr16018111Z --> 1odec11eg3p + tag16018111Z1819Z	Forward only	Glycerolipid metabolism	2.3.1.158	PLDAGAT16018111Z1819Z3	phospholipid: diacylglycerol acyltransferase (18:1(9Z))	0	0.0178763	2.99002e-05	1.37349e-05	0	0.0178763	3.21181e-05	0	1.63506e-05	1.1899e-18	0.684888	0	0.0178763	2.89855e-05	0	1.44935e-05	0.0217537	1.13542	0	0	0.0325899	5.94451e-05	3.02271e-05	0	0.0325899	5.57911e-05	0	3.19001e-05	0.000960997	0.773877	0	0.050077	5.5775e-05	0	2.54658e-05	7.31814e-18	0.724469	0	0
836	1		0	0	[c] : pa1819Z1819Z + 12dgr16018111Z --> 1odec9eg3p + tag16018111Z1819Z	Forward only	Glycerolipid metabolism	2.3.1.158	PLDAGAT16018111Z1819Z4	phospholipid: diacylglycerol acyltransferase (18:1(9Z))	0	0.0178763	3.33917e-05	1.67603e-05	0	0.0178763	2.98266e-05	0	1.50035e-05	1.57255e-09	0.260053	0	0.0178763	2.97432e-05	0	1.43047e-05	1.04733e-17	0.205574	0	0	0.0325899	5.67857e-05	2.94207e-05	0	0.0325899	6.02765e-05	0	3.467e-05	1.54019e-19	0.797671	0	0.050077	5.31187e-05	0	2.48743e-05	2.45369e-16	0.718086	0	0
837	0		0	1	[c] : pa18111Z160 + 12dgr1601819Z --> 1odec11eg3p + tag1601819Z160	Forward only	Glycerolipid metabolism	2.3.1.158	PLDAGAT1601819Z1601	phospholipid: diacylglycerol acyltransferase (16:0)	0	0.0195104	0.000110568	6.07073e-05	0	0.0195104	0.000109643	0	6.58339e-05	1.45539e-07	1.36213	0	0.0195104	0.000118018	0	6.42279e-05	0.00319834	0.193536	0	0	0.0355312	0.000166779	8.70731e-05	0	0.0355312	0.000190989	1	0.000117517	1.27677e-68	0.00129931	0	0.0529799	0.000188892	1	0.000102368	2.24176e-19	0.0131255	1	0
838	1		0	0	[c] : pa1819Z160 + 12dgr1601819Z --> 1odec9eg3p + tag1601819Z160	Forward only	Glycerolipid metabolism	2.3.1.158	PLDAGAT1601819Z1602	phospholipid: diacylglycerol acyltransferase (16:0)	0	0.0195104	9.67195e-05	4.93748e-05	0	0.0195104	9.11118e-05	0	4.72453e-05	0.00396153	0.349482	0	0.0195104	9.69154e-05	0	5.13418e-05	0.010252	1.46673	0	0	0.0355312	0.000190068	0.000102708	0	0.0355312	0.000159031	0	9.25844e-05	3.15732e-08	1.04343e-05	0	0.0529799	0.000182099	0	9.25564e-05	1.20196e-06	0.482901	0	0
839	1		0	0	[c] : pa16018111Z + 12dgr1601819Z --> 1hdecg3p + tag1601819Z18111Z	Forward only	Glycerolipid metabolism	2.3.1.158	PLDAGAT1601819Z18111Z1	phospholipid: diacylglycerol acyltransferase (18:1(11Z))	0	0.0165488	2.05332e-05	1.52886e-05	0	0.0165488	2.29167e-05	0	1.61397e-05	4.85876e-16	0.733374	0	0.0165488	8.71187e-06	0	4.61205e-06	0	6.17356e-08	0	0	0.0302003	2.03898e-05	9.86111e-06	0	0.0302003	1.41223e-05	0	8.06071e-06	4.54448e-37	0.196583	0	0.0478683	4.17779e-05	0	2.5251e-05	0	0.000198201	0	0
840	0		0	0	[c] : pa18111Z18111Z + 12dgr1601819Z --> 1odec11eg3p + tag1601819Z18111Z	Forward only	Glycerolipid metabolism	2.3.1.158	PLDAGAT1601819Z18111Z2	phospholipid: diacylglycerol acyltransferase (18:1(11Z))	0	0.0165488	1.14811e-05	4.27052e-06	0	0.0165488	7.49148e-06	0	4.49411e-06	2.01818e-46	0.201252	0	0.0165488	8.06296e-06	0	4.65308e-06	4.29081e-38	0.267635	0	0	0.0302003	2.11924e-05	1.02267e-05	0	0.0302003	1.47076e-05	0	8.15255e-06	2.25639e-41	0.241287	0	0.0478683	1.32469e-05	0	9.07672e-06	3.62642e-17	0.0198386	0	0
841	0		0	0	[c] : pa1819Z18111Z + 12dgr1601819Z --> 1odec9eg3p + tag1601819Z18111Z	Forward only	Glycerolipid metabolism	2.3.1.158	PLDAGAT1601819Z18111Z3	phospholipid: diacylglycerol acyltransferase (18:1(11Z))	0	0.0165488	8.00899e-06	4.25751e-06	0	0.0165488	9.6143e-06	0	4.67594e-06	3.21772e-10	0.75562	0	0.0165488	8.12226e-06	0	4.50298e-06	0.0034362	1.45482	0	0	0.0302003	2.18556e-05	9.82151e-06	0	0.0302003	2.00266e-05	0	9.0421e-06	8.07648e-16	1.16486	0	0.0478683	1.95212e-05	0	9.06675e-06	2.04508e-06	1.00302	0	0
842	1		0	0	[c] : pa1601819Z + 12dgr1601819Z --> 1hdecg3p + tag1601819Z1819Z	Forward only	Glycerolipid metabolism	2.3.1.158	PLDAGAT1601819Z1819Z1	phospholipid: diacylglycerol acyltransferase (18:1(9Z))	0	0.0178763	2.99329e-05	1.42376e-05	0	0.0178763	3.03198e-05	0	1.61901e-05	1.1325e-11	1.39105	0	0.0178763	3.22777e-05	0	1.71961e-05	1.43145e-23	0.381825	0	0	0.0325899	6.48144e-05	3.16089e-05	0	0.0325899	4.59221e-05	0	2.62359e-05	3.23282e-25	5.2077e-06	0	0.050077	6.76499e-05	0	2.80225e-05	1.05337e-08	1.08834	0	0
843	0		1	0	[c] : pa1801819Z + 12dgr1601819Z --> 1odecg3p + tag1601819Z1819Z	Forward only	Glycerolipid metabolism	2.3.1.158	PLDAGAT1601819Z1819Z2	phospholipid: diacylglycerol acyltransferase (18:1(9Z))	0	0.0178763	4.52467e-05	2.68223e-05	0	0.0178763	3.64513e-05	-1	1.90855e-05	1.23518e-115	0.00384075	0	0.0178763	3.03201e-05	-1	1.40365e-05	0	4.77476e-09	1	0	0.0325899	5.09042e-05	2.36046e-05	0	0.0325899	5.95229e-05	0	3.16585e-05	4.87777e-45	0.082572	0	0.050077	6.22338e-05	0	2.99266e-05	1.24218e-31	0.0340557	0	0
844	1		0	0	[c] : pa18111Z1819Z + 12dgr1601819Z --> 1odec11eg3p + tag1601819Z1819Z	Forward only	Glycerolipid metabolism	2.3.1.158	PLDAGAT1601819Z1819Z3	phospholipid: diacylglycerol acyltransferase (18:1(9Z))	0	0.0178763	3.4052e-05	1.58048e-05	0	0.0178763	3.15287e-05	0	1.71519e-05	2.07148e-05	0.459603	0	0.0178763	3.15537e-05	0	1.45468e-05	0.000169639	0.572516	0	0	0.0325899	6.15905e-05	3.05686e-05	0	0.0325899	5.09526e-05	0	2.79364e-05	7.76999e-06	0.00361349	0	0.050077	6.05486e-05	0	2.93796e-05	0.100485	1.27839	0	0
845	0		0	1	[c] : pa1819Z1819Z + 12dgr1601819Z --> 1odec9eg3p + tag1601819Z1819Z	Forward only	Glycerolipid metabolism	2.3.1.158	PLDAGAT1601819Z1819Z4	phospholipid: diacylglycerol acyltransferase (18:1(9Z))	0	0.0178763	2.53521e-05	1.25003e-05	0	0.0178763	2.75428e-05	0	1.43353e-05	3.45558e-16	0.478098	0	0.0178763	3.18356e-05	0	1.57579e-05	3.58855e-35	0.00376717	0	0	0.0325899	4.42388e-05	2.36279e-05	0	0.0325899	4.93302e-05	1	2.86711e-05	3.72896e-22	0.029191	0	0.050077	6.602e-05	1	3.12278e-05	1.06936e-47	5.5711e-07	1	0
846	0		0	1	[c] : pa18111Z160 + 12dgr1801819Z --> 1odec11eg3p + tag1801819Z160	Forward only	Glycerolipid metabolism	2.3.1.158	PLDAGAT1801819Z1601	phospholipid: diacylglycerol acyltransferase (16:0)	0	0.0195096	0.00011268	6.19646e-05	0	0.0195096	9.09358e-05	0	5.55227e-05	4.731e-12	4.90908e-08	0	0.0195096	0.000119359	0	6.63046e-05	0.000169639	0.279544	0	0	0.0355297	0.000172694	8.79699e-05	0	0.0355297	0.000197046	1	0.000120064	3.26145e-83	0.00576949	0	0.0529785	0.000210165	1	0.000117556	1.56357e-58	2.52347e-05	1	0
847	1		0	0	[c] : pa1819Z160 + 12dgr1801819Z --> 1odec9eg3p + tag1801819Z160	Forward only	Glycerolipid metabolism	2.3.1.158	PLDAGAT1801819Z1602	phospholipid: diacylglycerol acyltransferase (16:0)	0	0.0195096	9.68939e-05	4.95415e-05	0	0.0195096	9.72263e-05	0	5.38104e-05	3.81886e-06	1.46861	0	0.0195096	0.000106326	0	5.45292e-05	1.63234e-07	0.041741	0	0	0.0355297	0.000161064	9.14994e-05	0	0.0355297	0.00018354	0	0.000104722	3.07658e-15	0.00186706	0	0.0529785	0.00016665	0	8.99538e-05	0.0635969	0.628932	0	0
848	0		1	0	[c] : pa16018111Z + 12dgr1801819Z --> 1hdecg3p + tag1801819Z18111Z	Forward only	Glycerolipid metabolism	2.3.1.158	PLDAGAT1801819Z18111Z1	phospholipid: diacylglycerol acyltransferase (18:1(11Z))	0	0.016548	2.72174e-05	1.68434e-05	0	0.016548	1.88528e-05	-1	1.45961e-05	8.81031e-67	0.00695793	0	0.016548	1.10993e-05	-1	4.86574e-06	0	3.20502e-10	1	0	0.0301989	1.65905e-05	7.93572e-06	0	0.0301989	1.53147e-05	0	8.1217e-06	0.00488913	1.22934	0	0.047867	4.5819e-05	0	2.51499e-05	0	7.04105e-07	0	0
849	0		0	0	[c] : pa18111Z18111Z + 12dgr1801819Z --> 1odec11eg3p + tag1801819Z18111Z	Forward only	Glycerolipid metabolism	2.3.1.158	PLDAGAT1801819Z18111Z2	phospholipid: diacylglycerol acyltransferase (18:1(11Z))	0	0.016548	9.31843e-06	5.24407e-06	0	0.016548	7.62977e-06	0	4.22681e-06	1.56357e-58	0.67923	0	0.016548	8.42597e-06	0	4.49669e-06	1.34e-39	1.02385	0	0	0.0301989	1.29149e-05	7.3456e-06	0	0.0301989	1.31448e-05	0	7.52594e-06	3.81886e-06	1.44768	0	0.047867	2.05766e-05	0	8.82115e-06	3.29268e-27	0.181398	0	0
850	0		0	0	[c] : pa1819Z18111Z + 12dgr1801819Z --> 1odec9eg3p + tag1801819Z18111Z	Forward only	Glycerolipid metabolism	2.3.1.158	PLDAGAT1801819Z18111Z3	phospholipid: diacylglycerol acyltransferase (18:1(11Z))	0	0.016548	1.28374e-05	5.12258e-06	0	0.016548	6.91752e-06	-1	4.34199e-06	1.539e-33	0.0258343	0	0.016548	7.47712e-06	-1	4.42615e-06	7.14699e-26	0.0377235	1	0	0.0301989	1.47057e-05	7.82735e-06	0	0.0301989	1.51206e-05	0	8.22161e-06	3.3317e-05	1.41407	0	0.047867	2.36888e-05	0	9.8656e-06	7.81415e-40	0.093861	0	0
851	1		0	0	[c] : pa1601819Z + 12dgr1801819Z --> 1hdecg3p + tag1801819Z1819Z	Forward only	Glycerolipid metabolism	2.3.1.158	PLDAGAT1801819Z1819Z1	phospholipid: diacylglycerol acyltransferase (18:1(9Z))	0	0.0178755	3.0826e-05	1.49353e-05	0	0.0178755	3.10747e-05	0	1.61252e-05	0.000142488	1.44421	0	0.0178755	3.34787e-05	0	1.62641e-05	1.15574e-05	0.567565	0	0	0.0325885	6.05894e-05	2.86238e-05	0	0.0325885	5.27689e-05	0	2.84382e-05	0.017038	0.1788	0	0.0500757	6.21972e-05	0	2.78578e-05	0.0571956	1.0924	0	0
852	1		0	0	[c] : pa1801819Z + 12dgr1801819Z --> 1odecg3p + tag1801819Z1819Z	Forward only	Glycerolipid metabolism	2.3.1.158	PLDAGAT1801819Z1819Z2	phospholipid: diacylglycerol acyltransferase (18:1(9Z))	0	0.0178755	3.86394e-05	2.29186e-05	0	0.0178755	2.96377e-05	0	1.60515e-05	6.58778e-121	0.00163116	0	0.0178755	3.49596e-05	0	1.71784e-05	2.34357e-78	0.318111	0	0	0.0325885	5.84844e-05	2.95746e-05	0	0.0325885	5.33158e-05	0	2.73458e-05	1.27507e-05	0.454733	0	0.0500757	5.99575e-05	0	2.8763e-05	0.432471	1.1701	0	0
853	1		0	0	[c] : pa18111Z1819Z + 12dgr1801819Z --> 1odec11eg3p + tag1801819Z1819Z	Forward only	Glycerolipid metabolism	2.3.1.158	PLDAGAT1801819Z1819Z3	phospholipid: diacylglycerol acyltransferase (18:1(9Z))	0	0.0178755	2.91488e-05	1.54327e-05	0	0.0178755	3.27061e-05	0	1.57135e-05	0.116189	0.197584	0	0.0178755	3.36294e-05	0	1.47867e-05	0.0160123	0.166428	0	0	0.0325885	4.75127e-05	2.43537e-05	0	0.0325885	6.09743e-05	0	3.19798e-05	7.95391e-48	0.0013011	0	0.0500757	5.66041e-05	0	2.77059e-05	6.21384e-11	0.0835352	0	0
854	0		1	0	[c] : pa1819Z1819Z + 12dgr1801819Z --> 1odec9eg3p + tag1801819Z1819Z	Forward only	Glycerolipid metabolism	2.3.1.158	PLDAGAT1801819Z1819Z4	phospholipid: diacylglycerol acyltransferase (18:1(9Z))	0	0.0178755	2.55456e-05	1.22254e-05	0	0.0178755	3.35091e-05	1	1.65545e-05	1.20961e-49	0.0101968	0	0.0178755	3.26434e-05	1	1.60362e-05	2.29419e-39	0.00359888	1	0	0.0325885	6.21945e-05	3.24594e-05	0	0.0325885	5.10762e-05	0	2.98649e-05	2.0509e-07	0.0012591	0	0.0500757	6.30089e-05	0	2.94372e-05	1.48847e-06	1.34221	0	0
855	0		1	0	[c] : pa18111Z160 + 12dgr18111Z18111Z --> 1odec11eg3p + tag18111Z18111Z160	Forward only	Glycerolipid metabolism	2.3.1.158	PLDAGAT18111Z18111Z1601	phospholipid: diacylglycerol acyltransferase (16:0)	0	0.0195096	9.02008e-05	5.28481e-05	0	0.0195096	0.000120287	1	7.08411e-05	1.73519e-73	1.48509e-13	0	0.0195096	0.000118855	1	6.75511e-05	2.98595e-49	5.71232e-14	1	0	0.0355298	0.000170259	9.29644e-05	0	0.0355298	0.000171478	0	0.000108632	6.79326e-22	1.37968	0	0.0529786	0.000214997	0	0.000116066	9.90811e-37	3.86958e-07	0	0
856	1		0	0	[c] : pa1819Z160 + 12dgr18111Z18111Z --> 1odec9eg3p + tag18111Z18111Z160	Forward only	Glycerolipid metabolism	2.3.1.158	PLDAGAT18111Z18111Z1602	phospholipid: diacylglycerol acyltransferase (16:0)	0	0.0195096	9.22627e-05	4.77927e-05	0	0.0195096	9.16409e-05	0	4.87291e-05	0.493147	1.4019	0	0.0195096	0.000110678	0	5.50741e-05	1.45742e-13	5.5439e-06	0	0	0.0355298	0.000178597	9.49111e-05	0	0.0355298	0.000167164	0	9.3595e-05	0.0865876	0.24278	0	0.0529786	0.000184324	0	9.64514e-05	0.0486343	0.701727	0	0
857	1		0	0	[c] : pa16018111Z + 12dgr18111Z18111Z --> 1hdecg3p + tag18111Z18111Z18111Z	Forward only	Glycerolipid metabolism	2.3.1.158	PLDAGAT18111Z18111Z18111Z1	phospholipid: diacylglycerol acyltransferase (18:1(11Z))	0	0.0165481	2.04831e-05	1.52869e-05	0	0.0165481	1.92163e-05	0	1.46948e-05	2.50818e-05	1.03981	0	0.0165481	7.01676e-06	0	4.32356e-06	0	5.67223e-11	0	0	0.030199	1.40243e-05	7.54781e-06	0	0.030199	1.31374e-05	0	7.60093e-06	0.00011949	1.3065	0	0.0478671	4.31668e-05	0	2.53562e-05	0	5.15305e-08	0	0
858	0		0	0	[c] : pa18111Z18111Z + 12dgr18111Z18111Z --> 1odec11eg3p + tag18111Z18111Z18111Z	Forward only	Glycerolipid metabolism	2.3.1.158	PLDAGAT18111Z18111Z18111Z2	phospholipid: diacylglycerol acyltransferase (18:1(11Z))	0	0.0165481	7.10001e-06	3.88458e-06	0	0.0165481	8.34503e-06	0	4.46608e-06	1.03516e-16	0.920247	0	0.0165481	8.75133e-06	0	4.56154e-06	9.07127e-23	0.656041	0	0	0.030199	1.23621e-05	7.77459e-06	0	0.030199	1.69491e-05	0	8.21885e-06	2.87964e-07	0.228213	0	0.0478671	2.36392e-05	0	1.05559e-05	2.16184e-67	0.0045506	0	0
859	0		0	0	[c] : pa1819Z18111Z + 12dgr18111Z18111Z --> 1odec9eg3p + tag18111Z18111Z18111Z	Forward only	Glycerolipid metabolism	2.3.1.158	PLDAGAT18111Z18111Z18111Z3	phospholipid: diacylglycerol acyltransferase (18:1(11Z))	0	0.0165481	8.03197e-06	4.19043e-06	0	0.0165481	5.76248e-06	0	4.12089e-06	7.25318e-09	0.196753	0	0.0165481	8.77079e-06	0	4.78706e-06	1.98917e-13	1.13019	0	0	0.030199	1.35338e-05	7.88414e-06	0	0.030199	1.3062e-05	0	7.61035e-06	0.0034362	1.38992	0	0.0478671	1.74254e-05	0	9.03344e-06	1.05649e-19	0.247811	0	0
860	1		0	0	[c] : pa1601819Z + 12dgr18111Z18111Z --> 1hdecg3p + tag18111Z18111Z1819Z	Forward only	Glycerolipid metabolism	2.3.1.158	PLDAGAT18111Z18111Z1819Z1	phospholipid: diacylglycerol acyltransferase (18:1(9Z))	0	0.0178756	3.33467e-05	1.61251e-05	0	0.0178756	3.25199e-05	0	1.56537e-05	0.000467033	1.25963	0	0.0178756	3.28969e-05	0	1.57482e-05	0.00736639	1.35231	0	0	0.0325886	5.44272e-05	2.72951e-05	0	0.0325886	5.62245e-05	0	2.91817e-05	0.00030842	1.17442	0	0.0500758	5.58739e-05	0	2.77416e-05	0.00841783	1.18252	0	0
861	0		0	0	[c] : pa1801819Z + 12dgr18111Z18111Z --> 1odecg3p + tag18111Z18111Z1819Z	Forward only	Glycerolipid metabolism	2.3.1.158	PLDAGAT18111Z18111Z1819Z2	phospholipid: diacylglycerol acyltransferase (18:1(9Z))	0	0.0178756	4.58713e-05	2.52061e-05	0	0.0178756	3.2417e-05	-1	1.62761e-05	1.37786e-148	5.7602e-06	0	0.0178756	2.81305e-05	-1	1.34851e-05	3.96619e-270	4.89275e-10	1	0	0.0325886	4.77696e-05	2.43075e-05	0	0.0325886	5.87552e-05	1	3.23368e-05	7.8688e-51	0.0140781	0	0.0500758	5.93836e-05	1	2.84334e-05	8.7001e-17	0.020449	1	0
862	1		0	0	[c] : pa18111Z1819Z + 12dgr18111Z18111Z --> 1odec11eg3p + tag18111Z18111Z1819Z	Forward only	Glycerolipid metabolism	2.3.1.158	PLDAGAT18111Z18111Z1819Z3	phospholipid: diacylglycerol acyltransferase (18:1(9Z))	0	0.0178756	3.47837e-05	1.53955e-05	0	0.0178756	3.02513e-05	0	1.585e-05	0.191765	0.19631	0	0.0178756	3.33275e-05	0	1.58292e-05	0.337153	0.988789	0	0	0.0325886	5.05498e-05	2.60324e-05	0	0.0325886	5.75845e-05	0	3.16604e-05	9.97296e-27	0.143474	0	0.0500758	5.68685e-05	0	2.51862e-05	0.0389586	0.342867	0	0
863	0		0	0	[c] : pa1819Z1819Z + 12dgr18111Z18111Z --> 1odec9eg3p + tag18111Z18111Z1819Z	Forward only	Glycerolipid metabolism	2.3.1.158	PLDAGAT18111Z18111Z1819Z4	phospholipid: diacylglycerol acyltransferase (18:1(9Z))	0	0.0178756	3.30272e-05	1.62524e-05	0	0.0178756	3.14399e-05	0	1.59311e-05	0.0260188	0.897043	0	0.0178756	3.00973e-05	0	1.36021e-05	4.55609e-22	0.387695	0	0	0.0325886	5.7988e-05	2.84559e-05	0	0.0325886	5.7062e-05	0	2.91046e-05	0.658001	1.36547	0	0.0500758	5.76586e-05	0	2.61472e-05	1.04716e-05	1.43081	0	0
864	1		0	0	[c] : pa18111Z160 + 12dgr18111Z1819Z --> 1odec11eg3p + tag18111Z1819Z160	Forward only	Glycerolipid metabolism	2.3.1.158	PLDAGAT18111Z1819Z1601	phospholipid: diacylglycerol acyltransferase (16:0)	0	0.0195096	0.000105098	5.91501e-05	0	0.0195096	0.000107984	0	6.36182e-05	7.76999e-06	0.909676	0	0.0195096	0.000108254	0	5.77291e-05	3.44482e-06	0.795976	0	0	0.0355298	0.000167233	8.63731e-05	0	0.0355298	0.000184212	0	0.000117791	1.74622e-70	0.06357	0	0.0529786	0.00019593	0	0.000106064	2.78541e-36	0.00170389	0	0
865	0		1	0	[c] : pa1819Z160 + 12dgr18111Z1819Z --> 1odec9eg3p + tag18111Z1819Z160	Forward only	Glycerolipid metabolism	2.3.1.158	PLDAGAT18111Z1819Z1602	phospholipid: diacylglycerol acyltransferase (16:0)	0	0.0195096	8.50231e-05	4.19456e-05	0	0.0195096	0.000100314	1	5.50515e-05	6.37195e-44	0.000144108	0	0.0195096	9.8147e-05	1	5.02102e-05	4.00883e-23	0.00106163	1	0	0.0355298	0.000160014	8.83943e-05	0	0.0355298	0.000171289	0	0.000101034	7.78597e-14	0.237105	0	0.0529786	0.000190539	0	0.000102243	5.10528e-18	3.35697e-05	0	0
866	1		0	0	[c] : pa16018111Z + 12dgr18111Z1819Z --> 1hdecg3p + tag18111Z1819Z18111Z	Forward only	Glycerolipid metabolism	2.3.1.158	PLDAGAT18111Z1819Z18111Z1	phospholipid: diacylglycerol acyltransferase (18:1(11Z))	0	0.0165481	1.76351e-05	1.47411e-05	0	0.0165481	1.80142e-05	0	1.45558e-05	0.0217537	1.35701	0	0.0165481	1.1005e-05	0	4.53991e-06	0	0.00902711	0	0	0.030199	1.13751e-05	7.63605e-06	0	0.030199	1.62564e-05	0	8.0381e-06	3.15732e-08	0.0993428	0	0.0478671	3.76728e-05	0	2.39678e-05	0	4.07387e-08	0	0
867	1		0	0	[c] : pa18111Z18111Z + 12dgr18111Z1819Z --> 1odec11eg3p + tag18111Z1819Z18111Z	Forward only	Glycerolipid metabolism	2.3.1.158	PLDAGAT18111Z1819Z18111Z2	phospholipid: diacylglycerol acyltransferase (18:1(11Z))	0	0.0165481	6.81997e-06	4.10292e-06	0	0.0165481	7.8107e-06	0	4.38549e-06	4.0179e-05	1.02732	0	0.0165481	8.748e-06	0	4.68212e-06	7.3091e-17	0.485422	0	0	0.030199	1.50847e-05	7.91265e-06	0	0.030199	1.38872e-05	0	7.47418e-06	0.00177586	1.22048	0	0.0478671	1.76808e-05	0	9.44073e-06	3.22842e-33	0.822433	0	0
868	0		0	0	[c] : pa1819Z18111Z + 12dgr18111Z1819Z --> 1odec9eg3p + tag18111Z1819Z18111Z	Forward only	Glycerolipid metabolism	2.3.1.158	PLDAGAT18111Z1819Z18111Z3	phospholipid: diacylglycerol acyltransferase (18:1(11Z))	0	0.0165481	9.69007e-06	4.30888e-06	0	0.0165481	6.90691e-06	0	4.11743e-06	8.80206e-30	0.32541	0	0.0165481	8.01105e-06	0	4.46207e-06	1.03516e-16	0.688033	0	0	0.030199	1.47785e-05	7.4143e-06	0	0.030199	2.10303e-05	0	9.55083e-06	4.59767e-43	0.259251	0	0.0478671	1.66338e-05	0	9.07533e-06	1.67395e-35	0.928686	0	0
869	1		0	0	[c] : pa1601819Z + 12dgr18111Z1819Z --> 1hdecg3p + tag18111Z1819Z1819Z	Forward only	Glycerolipid metabolism	2.3.1.158	PLDAGAT18111Z1819Z1819Z1	phospholipid: diacylglycerol acyltransferase (18:1(9Z))	0	0.0178756	2.54506e-05	1.29333e-05	0	0.0178756	3.81089e-05	0	1.87072e-05	7.52034e-81	2.90823e-07	0	0.0178756	2.59273e-05	0	1.28705e-05	0.447251	1.3073	0	0	0.0325886	6.12299e-05	2.99374e-05	0	0.0325886	5.39891e-05	0	2.95653e-05	0.0635969	0.29296	0	0.0500758	5.33438e-05	0	2.65448e-05	8.2061e-11	0.214298	0	0
870	0		1	0	[c] : pa1801819Z + 12dgr18111Z1819Z --> 1odecg3p + tag18111Z1819Z1819Z	Forward only	Glycerolipid metabolism	2.3.1.158	PLDAGAT18111Z1819Z1819Z2	phospholipid: diacylglycerol acyltransferase (18:1(9Z))	0	0.0178756	4.18697e-05	2.4462e-05	0	0.0178756	3.15623e-05	-1	1.69172e-05	1.19569e-117	0.000191962	0	0.0178756	3.04343e-05	-1	1.50685e-05	2.95279e-189	1.40121e-05	1	0	0.0325886	5.9554e-05	2.97036e-05	0	0.0325886	5.72466e-05	0	2.78991e-05	0.00206222	1.14193	0	0.0500758	5.26493e-05	0	2.8965e-05	0.256978	0.132669	0	0
871	1		0	0	[c] : pa18111Z1819Z + 12dgr18111Z1819Z --> 1odec11eg3p + tag18111Z1819Z1819Z	Forward only	Glycerolipid metabolism	2.3.1.158	PLDAGAT18111Z1819Z1819Z3	phospholipid: diacylglycerol acyltransferase (18:1(9Z))	0	0.0178756	2.73476e-05	1.26013e-05	0	0.0178756	3.11181e-05	0	1.59469e-05	1.1157e-28	0.219121	0	0.0178756	2.97386e-05	0	1.41929e-05	4.97627e-09	0.515909	0	0	0.0325886	5.90657e-05	2.97098e-05	0	0.0325886	5.02606e-05	0	2.73173e-05	1.84032e-06	0.0718629	0	0.0500758	5.23187e-05	0	2.56314e-05	3.07658e-15	0.253633	0	0
872	1		0	0	[c] : pa1819Z1819Z + 12dgr18111Z1819Z --> 1odec9eg3p + tag18111Z1819Z1819Z	Forward only	Glycerolipid metabolism	2.3.1.158	PLDAGAT18111Z1819Z1819Z4	phospholipid: diacylglycerol acyltransferase (18:1(9Z))	0	0.0178756	2.88576e-05	1.42381e-05	0	0.0178756	3.73396e-05	0	1.68281e-05	2.17968e-14	0.00733471	0	0.0178756	2.88738e-05	0	1.37844e-05	0.0260188	1.4977	0	0	0.0325886	6.52108e-05	3.08602e-05	0	0.0325886	5.93359e-05	0	3.20843e-05	0.0368199	0.426739	0	0.0500758	6.94789e-05	0	3.19781e-05	0.0956594	0.796396	0	0
873	1		0	0	[c] : pa18111Z160 + 12dgr1819Z18111Z --> 1odec11eg3p + tag1819Z18111Z160	Forward only	Glycerolipid metabolism	2.3.1.158	PLDAGAT1819Z18111Z1601	phospholipid: diacylglycerol acyltransferase (16:0)	0	0.0195096	0.000108836	5.92486e-05	0	0.0195096	0.000115665	0	6.99025e-05	4.11295e-27	0.324797	0	0.0195096	0.000106267	0	5.79756e-05	0.00112316	0.98789	0	0	0.0355298	0.000168397	8.7242e-05	0	0.0355298	0.000185889	0	0.00011297	8.65873e-45	0.0561077	0	0.0529786	0.000218465	0	0.000112311	6.50018e-45	6.70391e-09	0	0
874	1		0	0	[c] : pa1819Z160 + 12dgr1819Z18111Z --> 1odec9eg3p + tag1819Z18111Z160	Forward only	Glycerolipid metabolism	2.3.1.158	PLDAGAT1819Z18111Z1602	phospholipid: diacylglycerol acyltransferase (16:0)	0	0.0195096	9.37414e-05	4.6844e-05	0	0.0195096	0.000102568	0	5.56152e-05	1.42951e-18	0.0601665	0	0.0195096	0.000114463	0	5.81363e-05	1.1157e-28	5.26699e-07	0	0	0.0355298	0.000181309	9.76747e-05	0	0.0355298	0.000190014	0	0.000112842	4.85876e-16	0.529136	0	0.0529786	0.000178936	0	9.32337e-05	0.020477	1.16361	0	0
875	1		0	0	[c] : pa16018111Z + 12dgr1819Z18111Z --> 1hdecg3p + tag1819Z18111Z18111Z	Forward only	Glycerolipid metabolism	2.3.1.158	PLDAGAT1819Z18111Z18111Z1	phospholipid: diacylglycerol acyltransferase (18:1(11Z))	0	0.0165481	2.00697e-05	1.52085e-05	0	0.0165481	2.23323e-05	0	1.50366e-05	0.00369027	0.75263	0	0.0165481	9.37362e-06	0	4.67495e-06	0	9.91983e-07	0	0	0.030199	1.30514e-05	7.30215e-06	0	0.030199	1.91695e-05	0	8.69578e-06	1.36128e-22	0.171594	0	0.0478671	4.01222e-05	0	2.57478e-05	0	2.15314e-07	0	0
876	1		0	0	[c] : pa18111Z18111Z + 12dgr1819Z18111Z --> 1odec11eg3p + tag1819Z18111Z18111Z	Forward only	Glycerolipid metabolism	2.3.1.158	PLDAGAT1819Z18111Z18111Z2	phospholipid: diacylglycerol acyltransferase (18:1(11Z))	0	0.0165481	5.69471e-06	3.93959e-06	0	0.0165481	7.36304e-06	0	4.3596e-06	4.38544e-09	0.37922	0	0.0165481	7.55655e-06	0	4.31231e-06	4.51949e-08	0.258807	0	0	0.030199	1.34865e-05	7.67357e-06	0	0.030199	1.95561e-05	0	9.04117e-06	2.73059e-30	0.234648	0	0.0478671	1.69719e-05	0	9.01287e-06	7.05632e-29	0.628636	0	0
877	0		0	0	[c] : pa1819Z18111Z + 12dgr1819Z18111Z --> 1odec9eg3p + tag1819Z18111Z18111Z	Forward only	Glycerolipid metabolism	2.3.1.158	PLDAGAT1819Z18111Z18111Z3	phospholipid: diacylglycerol acyltransferase (18:1(11Z))	0	0.0165481	1.04098e-05	4.3106e-06	0	0.0165481	7.55836e-06	0	4.33511e-06	6.74794e-33	0.397911	0	0.0165481	8.04837e-06	0	4.59436e-06	3.72044e-26	0.503196	0	0	0.030199	1.30153e-05	7.7855e-06	0	0.030199	1.14865e-05	0	7.55093e-06	0.0347845	0.951248	0	0.0478671	1.68483e-05	0	9.27789e-06	1.59845e-37	0.529201	0	0
878	1		0	0	[c] : pa1601819Z + 12dgr1819Z18111Z --> 1hdecg3p + tag1819Z18111Z1819Z	Forward only	Glycerolipid metabolism	2.3.1.158	PLDAGAT1819Z18111Z1819Z1	phospholipid: diacylglycerol acyltransferase (18:1(9Z))	0	0.0178756	3.2444e-05	1.47329e-05	0	0.0178756	2.98864e-05	0	1.52338e-05	0.00396153	0.434609	0	0.0178756	3.08783e-05	0	1.56483e-05	1.0634e-09	0.836928	0	0	0.0325886	5.96453e-05	2.88337e-05	0	0.0325886	5.99739e-05	0	3.29017e-05	1.42428e-10	1.44334	0	0.0500758	6.05346e-05	0	2.59594e-05	1.08197e-10	1.31495	0	0
879	0		1	0	[c] : pa1801819Z + 12dgr1819Z18111Z --> 1odecg3p + tag1819Z18111Z1819Z	Forward only	Glycerolipid metabolism	2.3.1.158	PLDAGAT1819Z18111Z1819Z2	phospholipid: diacylglycerol acyltransferase (18:1(9Z))	0	0.0178756	4.72986e-05	2.45106e-05	0	0.0178756	2.9985e-05	-1	1.52043e-05	9.73724e-164	2.57345e-06	0	0.0178756	2.98827e-05	-1	1.45835e-05	9.62408e-189	1.10754e-06	1	0	0.0325886	5.2293e-05	2.74624e-05	0	0.0325886	5.43797e-05	0	3.12327e-05	5.67714e-14	0.980106	0	0.0500758	5.67412e-05	0	2.51637e-05	4.01181e-08	0.569649	0	0
880	1		0	0	[c] : pa18111Z1819Z + 12dgr1819Z18111Z --> 1odec11eg3p + tag1819Z18111Z1819Z	Forward only	Glycerolipid metabolism	2.3.1.158	PLDAGAT1819Z18111Z1819Z3	phospholipid: diacylglycerol acyltransferase (18:1(9Z))	0	0.0178756	2.91652e-05	1.416e-05	0	0.0178756	3.13286e-05	0	1.46684e-05	0.236861	0.86025	0	0.0178756	2.99536e-05	0	1.43352e-05	0.133857	1.17855	0	0	0.0325886	6.20009e-05	3.06539e-05	0	0.0325886	6.31462e-05	0	3.33231e-05	1.48847e-06	1.33107	0	0.0500758	5.66975e-05	0	2.50871e-05	1.01127e-21	0.475989	0	0
881	1		0	0	[c] : pa1819Z1819Z + 12dgr1819Z18111Z --> 1odec9eg3p + tag1819Z18111Z1819Z	Forward only	Glycerolipid metabolism	2.3.1.158	PLDAGAT1819Z18111Z1819Z4	phospholipid: diacylglycerol acyltransferase (18:1(9Z))	0	0.0178756	3.20059e-05	1.53864e-05	0	0.0178756	3.19633e-05	0	1.67276e-05	5.6158e-07	1.4933	0	0.0178756	2.58639e-05	0	1.25631e-05	4.00883e-23	0.00749123	0	0	0.0325886	5.73937e-05	2.88004e-05	0	0.0325886	4.90124e-05	0	2.64649e-05	4.51949e-08	0.0322217	0	0.0500758	5.18123e-05	0	2.53798e-05	2.20751e-15	0.388938	0	0
882	1		0	0	[c] : pa18111Z160 + 12dgr1819Z1819Z --> 1odec11eg3p + tag1819Z1819Z160	Forward only	Glycerolipid metabolism	2.3.1.158	PLDAGAT1819Z1819Z1601	phospholipid: diacylglycerol acyltransferase (16:0)	0	0.0195096	9.05342e-05	4.95843e-05	0	0.0195096	8.65781e-05	0	4.73195e-05	0.000335377	0.519921	0	0.0195096	9.98727e-05	0	5.43915e-05	1.48847e-06	0.0127821	0	0	0.0355298	0.000191086	0.000102391	0	0.0355298	0.000156595	0	8.94435e-05	1.74271e-11	5.24031e-07	0	0.0529786	0.000187585	0	9.46702e-05	0.000260519	1.07963	0	0
883	1		0	0	[c] : pa1819Z160 + 12dgr1819Z1819Z --> 1odec9eg3p + tag1819Z1819Z160	Forward only	Glycerolipid metabolism	2.3.1.158	PLDAGAT1819Z1819Z1602	phospholipid: diacylglycerol acyltransferase (16:0)	0	0.0195096	9.20497e-05	4.62015e-05	0	0.0195096	9.97441e-05	0	5.55059e-05	5.93979e-21	0.179824	0	0.0195096	0.000107038	0	5.4858e-05	2.54823e-17	0.000933824	0	0	0.0355298	0.000167607	8.80229e-05	0	0.0355298	0.000172193	0	9.59324e-05	3.44482e-06	1.00195	0	0.0529786	0.000194834	0	9.7545e-05	5.64443e-09	0.00248083	0	0
884	1		0	0	[c] : pa16018111Z + 12dgr1819Z1819Z --> 1hdecg3p + tag1819Z1819Z18111Z	Forward only	Glycerolipid metabolism	2.3.1.158	PLDAGAT1819Z1819Z18111Z1	phospholipid: diacylglycerol acyltransferase (18:1(11Z))	0	0.0165481	8.21601e-06	4.13643e-06	0	0.0165481	9.10557e-06	0	4.47373e-06	1.65541e-06	1.13646	0	0.0165481	1.31274e-05	0	5.56874e-06	1.46162e-61	0.0785404	0	0	0.030199	1.41368e-05	7.72e-06	0	0.030199	1.3026e-05	0	8.14488e-06	6.79275e-13	1.14081	0	0.0478671	3.54103e-05	0	1.34095e-05	3.71608e-184	0.000655388	0	0
885	1		0	0	[c] : pa18111Z18111Z + 12dgr1819Z1819Z --> 1odec11eg3p + tag1819Z1819Z18111Z	Forward only	Glycerolipid metabolism	2.3.1.158	PLDAGAT1819Z1819Z18111Z2	phospholipid: diacylglycerol acyltransferase (18:1(11Z))	0	0.0165481	7.43551e-06	4.16936e-06	0	0.0165481	1.39082e-05	0	5.6153e-06	1.46162e-61	0.0335365	0	0.0165481	1.2488e-05	0	5.42598e-06	3.52656e-63	0.0662125	0	0	0.030199	1.06085e-05	7.21154e-06	0	0.030199	1.40462e-05	0	7.876e-06	4.97627e-09	0.293041	0	0.0478671	3.01321e-05	0	1.21312e-05	2.13325e-183	8.86754e-06	0	0
886	1		0	0	[c] : pa1819Z18111Z + 12dgr1819Z1819Z --> 1odec9eg3p + tag1819Z1819Z18111Z	Forward only	Glycerolipid metabolism	2.3.1.158	PLDAGAT1819Z1819Z18111Z3	phospholipid: diacylglycerol acyltransferase (18:1(11Z))	0	0.0165481	7.23939e-06	4.14477e-06	0	0.0165481	1.02467e-05	0	5.46269e-06	1.15695e-98	0.334151	0	0.0165481	1.00836e-05	0	5.44082e-06	4.53092e-64	0.208251	0	0	0.030199	1.52924e-05	7.96554e-06	0	0.030199	1.92501e-05	0	8.74183e-06	1.19193e-08	0.582823	0	0.0478671	1.68523e-05	0	9.02964e-06	5.69893e-34	1.09767	0	0
887	1		0	0	[c] : pa1601819Z + 12dgr1819Z1819Z --> 1hdecg3p + tag1819Z1819Z1819Z	Forward only	Glycerolipid metabolism	2.3.1.158	PLDAGAT1819Z1819Z1819Z1	phospholipid: diacylglycerol acyltransferase (18:1(9Z))	0	0.0178756	2.99174e-05	1.43984e-05	0	0.0178756	3.05671e-05	0	1.6953e-05	6.11361e-18	1.22055	0	0.0178756	2.90381e-05	0	1.44718e-05	0.0435635	1.13019	0	0	0.0325886	5.62329e-05	2.92306e-05	0	0.0325886	5.74901e-05	0	2.99705e-05	0.227256	1.30175	0	0.0500758	6.6449e-05	0	3.03627e-05	0.00239091	0.152645	0	0
888	1		0	0	[c] : pa1801819Z + 12dgr1819Z1819Z --> 1odecg3p + tag1819Z1819Z1819Z	Forward only	Glycerolipid metabolism	2.3.1.158	PLDAGAT1819Z1819Z1819Z2	phospholipid: diacylglycerol acyltransferase (18:1(9Z))	0	0.0178756	3.10203e-05	1.47163e-05	0	0.0178756	2.88203e-05	0	1.46353e-05	0.191765	0.642594	0	0.0178756	2.96834e-05	0	1.34919e-05	2.07148e-05	0.955268	0	0	0.0325886	6.02715e-05	2.99139e-05	0	0.0325886	5.91721e-05	0	3.04649e-05	0.300914	1.34525	0	0.0500758	6.53578e-05	0	3.07458e-05	0.000888384	0.621669	0	0
889	1		0	0	[c] : pa18111Z1819Z + 12dgr1819Z1819Z --> 1odec11eg3p + tag1819Z1819Z1819Z	Forward only	Glycerolipid metabolism	2.3.1.158	PLDAGAT1819Z1819Z1819Z3	phospholipid: diacylglycerol acyltransferase (18:1(9Z))	0	0.0178756	3.05611e-05	1.52063e-05	0	0.0178756	3.14391e-05	0	1.65022e-05	2.75826e-05	1.18529	0	0.0178756	2.87048e-05	0	1.44773e-05	0.00841783	0.706018	0	0	0.0325886	6.21458e-05	3.26068e-05	0	0.0325886	5.5655e-05	0	3.12672e-05	0.00736639	0.346755	0	0.0500758	7.20523e-05	0	3.16701e-05	0.447251	0.245475	0	0
890	1		0	0	[c] : pa1819Z1819Z + 12dgr1819Z1819Z --> 1odec9eg3p + tag1819Z1819Z1819Z	Forward only	Glycerolipid metabolism	2.3.1.158	PLDAGAT1819Z1819Z1819Z4	phospholipid: diacylglycerol acyltransferase (18:1(9Z))	0	0.0178756	3.34262e-05	1.67092e-05	0	0.0178756	3.04929e-05	0	1.60491e-05	0.00561398	0.397089	0	0.0178756	2.73819e-05	0	1.32866e-05	1.539e-33	0.00974689	0	0	0.0325886	5.27433e-05	2.58138e-05	0	0.0325886	5.85551e-05	0	3.2178e-05	2.63494e-27	0.349083	0	0.0500758	5.69088e-05	0	2.74928e-05	0.00369027	0.612163	0	0
891	0		0	0	[c] : sqdg18111Z160 + cacoa --> asqdca18111Z160 + coa	Forward only	Glycerolipid metabolism		SQDGATCA18111Z160	sulfolipid 2'-O-acyltransferase (2'-18:3(5,9,12,15)/18:1(11Z)/16:0)	2.25879e-05	2.25879e-05	2.25879e-05	2.25879e-05	2.25879e-05	2.25879e-05	2.25879e-05	1	2.25879e-05	0	0	2.25879e-05	2.25879e-05	2.25879e-05	-1	2.25879e-05	0	0	1	4.06582e-05	4.06582e-05	4.06582e-05	4.06582e-05	4.06582e-05	4.06582e-05	4.06582e-05	-1	4.06582e-05	3.05701e-265	7.04785e-195	3.7581e-05	3.7581e-05	3.7581e-05	-1	3.7581e-05	0	0	1	7.46642e-05
892	0		0	0	[c] : sqdg1819Z160 + cacoa --> asqdca1819Z160 + coa	Forward only	Glycerolipid metabolism		SQDGATCA1819Z160	sulfolipid 2'-O-acyltransferase (2'-18:4(5,9,12,15)/18:1(9Z)/16:0)	6.78906e-05	6.78906e-05	6.78906e-05	6.78906e-05	6.78906e-05	6.78906e-05	6.78906e-05	-1	6.78906e-05	0	0	6.78906e-05	6.78906e-05	6.78906e-05	1	6.78906e-05	0	0	1	0.000122203	0.000122203	0.000122203	0.000122203	0.000122203	0.000122203	0.000122203	1	0.000122203	0	0	0.000112954	0.000112954	0.000112954	-1	0.000112954	0	0	1	0.000224412
893	0		0	0	[c] : sqdg18111Z160 + pacoa --> asqdpa18111Z160 + coa	Forward only	Glycerolipid metabolism		SQDGATPA18111Z160	sulfolipid 2'-O-acyltransferase (2'-18:3(5,9,12)/18:1(11Z)/16:0)	2.25459e-05	2.25459e-05	2.25459e-05	2.25459e-05	2.25459e-05	2.25459e-05	2.25459e-05	1	2.25459e-05	0	0	2.25459e-05	2.25459e-05	2.25459e-05	1	2.25459e-05	0	0	1	4.05826e-05	4.05826e-05	4.05826e-05	4.05826e-05	4.05826e-05	4.05826e-05	4.05826e-05	-1	4.05826e-05	0	3.19365e-258	3.75111e-05	3.75111e-05	3.75111e-05	-1	3.75111e-05	0	0	1	7.45253e-05
894	0		0	1	[c] : sqdg1819Z160 + pacoa --> asqdpa1819Z160 + coa	Forward only	Glycerolipid metabolism		SQDGATPA1819Z160	sulfolipid 2'-O-acyltransferase (2'-18:3(5,9,12)/18:1(9Z)/16:0)	6.7764e-05	6.7764e-05	6.7764e-05	6.7764e-05	6.7764e-05	6.7764e-05	6.7764e-05	0	6.7764e-05	7.60701944616784e-310	0	6.7764e-05	6.7764e-05	6.7764e-05	0	6.7764e-05	0	0	0	0.000121975	0.000121975	0.000121975	0.000121975	0.000121975	0.000121975	0.000121975	-1	0.000121975	1.21728e-150	8.44912e-195	0.000112744	0.000112744	0.000112744	-1	0.000112744	0	0	1	0.000223994
895	0		0	0	[h] : udpsq + 12dgr160 --> sqdg160 + udp + h	Forward only	Glycerolipid metabolism	2.4.1.-	SQDGS160	sulfolipid synthase (16:0/16:0)	4.66124e-05	4.66124e-05	4.66124e-05	4.66124e-05	4.66124e-05	4.66124e-05	4.66124e-05	1	4.66124e-05	0	0	4.66124e-05	4.66124e-05	4.66124e-05	-1	4.66124e-05	1.69714e-25	1.29746e-09	1	8.39024e-05	8.39024e-05	8.39024e-05	8.39024e-05	8.39024e-05	8.39024e-05	8.39024e-05	1	8.39024e-05	2.49242e-264	0	7.75522e-05	7.75522e-05	7.75522e-05	-1	7.75522e-05	0	0	1	0.000154077
896	0		0	0	[h] : udpsq + 12dgr18111Z160 --> sqdg18111Z160 + udp + h	Forward only	Glycerolipid metabolism	2.4.1.-	SQDGS18111Z160	sulfolipid synthase (18:1(11Z)/16:0)	5.43446e-05	5.43446e-05	5.43446e-05	5.43446e-05	5.43446e-05	5.43446e-05	5.43446e-05	1	5.43446e-05	0	0	5.43446e-05	5.43446e-05	5.43446e-05	-1	5.43446e-05	0	0	1	9.78203e-05	9.78203e-05	9.78203e-05	9.78203e-05	9.78203e-05	9.78203e-05	9.78203e-05	-1	9.78203e-05	0	0	9.04167e-05	9.04167e-05	9.04167e-05	-1	9.04167e-05	0	0	1	0.000179636
897	0		0	0	[h] : udpsq + 12dgr1819Z160 --> sqdg1819Z160 + udp + h	Forward only	Glycerolipid metabolism	2.4.1.-	SQDGS1819Z160	sulfolipid synthase (18:1(9Z)/16:0)	0.000173526	0.000173526	0.000173526	0.000173526	0.000173526	0.000173526	0.000173526	-1	0.000173526	0	0	0.000173526	0.000173526	0.000173526	-1	0.000173526	2.18763e-224	1.49753e-220	1	0.000312346	0.000312346	0.000312346	0.000312346	0.000312346	0.000312346	0.000312346	1	0.000312346	0	0	0.000288706	0.000288706	0.000288706	-1	0.000288706	0	0	1	0.000573588
898	0		0	0	[h] : sqdg1829Z12Z160 + fdxox + o2 + (4) nadph --> sqdg1839Z12Z15Z160 + fdxrd + (2) h2o + (4) nadp	Forward only	Glycerolipid metabolism		SQDGW3DS1839Z12Z15Z160	omega-3 desaturase (18:3(9Z,12Z,15Z)/16:0) (SQDG)	1.48101e-05	1.48101e-05	1.48101e-05	1.48101e-05	1.48101e-05	1.48101e-05	1.48101e-05	-1	1.48101e-05	4.03224e-49	4.43613e-41	1.48101e-05	1.48101e-05	1.48101e-05	1	1.48101e-05	1.95705e-52	1.1047e-21	1	2.66582e-05	2.66582e-05	2.66582e-05	2.66582e-05	2.66582e-05	2.66582e-05	2.66582e-05	-1	2.66582e-05	0	0	2.46405e-05	2.46405e-05	2.46405e-05	-1	2.46405e-05	0	0	1	4.89547e-05
899	0		0	0	[h] : sqdg1819Z160 + fdxox + o2 + (4) nadph --> sqdg1829Z12Z160 + fdxrd + (2) h2o + (4) nadp	Forward only	Glycerolipid metabolism		SQDGW6DS1829Z12Z160	omega-6 desaturase (18:2(9Z,12Z)/16:0) (SQDG)	2.86603e-05	2.86603e-05	2.86603e-05	2.86603e-05	2.86603e-05	2.86603e-05	2.86603e-05	1	2.86603e-05	0	0	2.86603e-05	2.86603e-05	2.86603e-05	1	2.86603e-05	0	0	1	5.15885e-05	5.15885e-05	5.15885e-05	5.15885e-05	5.15885e-05	5.15885e-05	5.15885e-05	-1	5.15885e-05	6.55374e-227	3.52504e-191	4.7684e-05	4.7684e-05	4.7684e-05	-1	4.7684e-05	0	0	1	9.47363e-05
900	1		0	0	[c] : tag16018111Z160 + h2o --> 12dgr16018111Z + hdca + h	Forward only	Glycerolipid metabolism	3.1.1.3	TAGAH16018111Z160	triacylglycerol acylhydrolase (16:0/18:1(11Z)/16:0)	0	0.0194851	0.0002421	0.000146115	0	0.0194851	0.000245338	0	0.000156677	5.81526e-05	1.12078	0	0.0194851	0.000275762	0	0.000170153	1.03516e-16	1.24621e-06	0	0	0.0354856	0.000471605	0.000291996	0	0.0354856	0.000454539	0	0.000289233	0.0347845	0.426739	0	0.0529377	0.000473596	0	0.000300487	0.0865876	1.34716	0	0
901	1		0	0	[c] : tag16018111Z180 + h2o --> 12dgr16018111Z + ocdca + h	Forward only	Glycerolipid metabolism	3.1.1.3	TAGAH16018111Z180	triacylglycerol acylhydrolase (16:0/18:1(11Z)/18:0)	0	0.0165242	6.60979e-06	1.6942e-06	0	0.0165242	7.56312e-06	0	1.82372e-06	0.000201639	1.16152	0	0.0165242	6.50371e-06	0	1.62813e-06	1.05337e-08	1.46645	0	0	0.0301561	8.66889e-06	3.14558e-06	0	0.0301561	1.31685e-05	0	3.62586e-06	2.77579e-28	0.519112	0	0.0478275	2.52141e-05	0	5.64319e-06	4.25301e-260	0.00436242	0	0
902	0		0	0	[c] : tag16018111Z18111Z + h2o --> 12dgr16018111Z + ocdcea + h	Forward only	Glycerolipid metabolism	3.1.1.3	TAGAH16018111Z18111Z	triacylglycerol acylhydrolase (16:0/18:1(11Z)/18:1(11Z))	0	0.0165242	1.90666e-05	4.86303e-06	0	0.0165242	2.39415e-05	0	5.92459e-06	6.86175e-28	0.552541	0	0.0165242	1.68646e-05	0	4.59515e-06	0.013259	0.95061	0	0	0.0301561	3.00393e-05	8.65929e-06	0	0.0301561	5.14888e-05	1	1.67213e-05	1.48446e-245	0.00880867	0	0.0478275	6.07572e-05	1	1.95885e-05	0	0.000388377	1	0
903	1		0	0	[c] : tag16018111Z1819Z + h2o --> 12dgr16018111Z + ocdce9a + h	Forward only	Glycerolipid metabolism	3.1.1.3	TAGAH16018111Z1819Z	triacylglycerol acylhydrolase (16:0/18:1(11Z)/18:1(9Z))	0	0.0178517	0.000128544	7.50485e-05	0	0.0178517	0.000129031	0	8.04577e-05	2.0509e-07	1.45451	0	0.0178517	0.000121392	0	7.08459e-05	0.000888384	0.352596	0	0	0.0325457	0.000240912	0.000148096	0	0.0325457	0.000245716	0	0.000156236	2.27169e-06	1.12129	0	0.0500362	0.000239781	0	0.000139024	1.63234e-07	1.40433	0	0
904	1		0	0	[c] : tag16018111Z1835Z9Z12Z + h2o --> 12dgr16018111Z + pa + h	Forward only	Glycerolipid metabolism	3.1.1.3	TAGAH16018111Z1835Z9Z12Z	triacylglycerol acylhydrolase (16:0/18:1(11Z)/18:3(5Z,9Z,12Z))	0	0.0165242	6.81956e-06	1.66525e-06	0	0.0165242	6.52938e-06	0	1.84461e-06	1.57255e-09	1.4284	0	0.0165242	5.37623e-06	0	1.77901e-06	4.36628e-30	0.858523	0	0	0.0301561	1.40717e-05	3.17124e-06	0	0.0301561	2.20242e-05	0	5.53537e-06	4.83086e-149	0.264512	0	0.0478275	2.18202e-05	0	5.35299e-06	3.23941e-137	0.20406	0	0
905	0		0	0	[c] : tag16018111Z1845Z9Z12Z15Z + h2o --> 12dgr16018111Z + ca	Forward only	Glycerolipid metabolism	3.1.1.3	TAGAH16018111Z1845Z9Z12Z15Z	triacylglycerol acylhydrolase (16:0/18:1(11Z)/18:4(5Z,9Z,12Z,15Z))	0	0.0165242	5.98857e-06	1.59417e-06	0	0.0165242	6.44199e-06	0	1.77382e-06	4.88692e-21	1.38434	0	0.0165242	7.77728e-06	0	1.71983e-06	1.89898e-20	0.811673	0	0	0.0301561	1.34626e-05	3.43372e-06	0	0.0301561	1.44048e-05	0	4.07189e-06	2.47265e-18	1.35625	0	0.0478275	1.86211e-05	0	5.07766e-06	2.41619e-136	0.579336	0	0
906	1		0	0	[c] : tag1601819Z160 + h2o --> 12dgr1601819Z + hdca + h	Forward only	Glycerolipid metabolism	3.1.1.3	TAGAH1601819Z160	triacylglycerol acylhydrolase (16:0/18:1(9Z)/16:0)	0	0.0194851	0.000256255	0.000158246	0	0.0194851	0.000245389	0	0.000154601	0.00425103	0.228928	0	0.0194851	0.000267144	0	0.000168812	2.52241e-06	0.198111	0	0	0.0354856	0.00045598	0.000283223	0	0.0354856	0.000438243	0	0.000287853	6.97922e-05	0.296557	0	0.0529377	0.000460727	0	0.000280497	0.0571956	1.11102	0	0
907	0		0	0	[c] : tag1601819Z180 + h2o --> 12dgr1601819Z + ocdca + h	Forward only	Glycerolipid metabolism	3.1.1.3	TAGAH1601819Z180	triacylglycerol acylhydrolase (16:0/18:1(9Z)/18:0)	0	0.0165242	7.98949e-06	1.68375e-06	0	0.0165242	6.78337e-06	0	1.90096e-06	6.13804e-17	1.11903	0	0.0165242	8.98856e-06	0	1.69363e-06	0.40375	1.17276	0	0	0.0301561	1.04259e-05	3.46537e-06	0	0.0301561	1.09146e-05	0	3.5504e-06	1.87188e-10	1.38992	0	0.0478275	1.80647e-05	0	5.29555e-06	6.93214e-177	0.110947	0	0
908	0		0	0	[c] : tag1601819Z18111Z + h2o --> 12dgr1601819Z + ocdcea + h	Forward only	Glycerolipid metabolism	3.1.1.3	TAGAH1601819Z18111Z	triacylglycerol acylhydrolase (16:0/18:1(9Z)/18:1(11Z))	0	0.0165242	2.19093e-05	4.73737e-06	0	0.0165242	2.27528e-05	0	6.63858e-06	3.61737e-73	1.37833	0	0.0165242	1.85977e-05	0	4.98604e-06	5.00898e-13	0.766607	0	0	0.0301561	5.59656e-05	1.74146e-05	0	0.0301561	3.8981e-05	0	1.20932e-05	2.20459e-83	0.0908326	0	0.0478275	4.8808e-05	0	1.42756e-05	8.87735e-26	0.718734	0	0
909	1		0	0	[c] : tag1601819Z1819Z + h2o --> 12dgr1601819Z + ocdce9a + h	Forward only	Glycerolipid metabolism	3.1.1.3	TAGAH1601819Z1819Z	triacylglycerol acylhydrolase (16:0/18:1(9Z)/18:1(9Z))	0	0.0178517	0.000126663	7.37411e-05	0	0.0178517	0.000130591	0	8.40398e-05	2.96577e-18	0.811775	0	0.0178517	0.000128924	0	7.75335e-05	0.00319834	1.09124	0	0	0.0325457	0.00022616	0.000134222	0	0.0325457	0.000212785	0	0.000131507	0.0109394	0.283974	0	0.0500362	0.00027915	0	0.000160677	7.40061e-23	4.8052e-05	0	0
910	0		0	0	[c] : tag1601819Z1835Z9Z12Z + h2o --> 12dgr1601819Z + pa + h	Forward only	Glycerolipid metabolism	3.1.1.3	TAGAH1601819Z1835Z9Z12Z	triacylglycerol acylhydrolase (16:0/18:1(9Z)/18:3(5Z,9Z,12Z))	0	0.0165242	5.75929e-06	1.70207e-06	0	0.0165242	8.17273e-06	0	1.82552e-06	1.77095e-24	0.58653	0	0.0165242	9.71415e-06	0	2.57463e-06	2.13325e-183	0.225981	0	0	0.0301561	1.56214e-05	3.33101e-06	0	0.0301561	1.10222e-05	0	3.70405e-06	1.57932e-31	0.552751	0	0.0478275	1.78792e-05	0	5.21196e-06	1.33756e-228	1.08519	0	0
911	0		0	0	[c] : tag1601819Z1845Z9Z12Z15Z + h2o --> 12dgr1601819Z + ca	Forward only	Glycerolipid metabolism	3.1.1.3	TAGAH1601819Z1845Z9Z12Z15Z	triacylglycerol acylhydrolase (16:0/18:1(9Z)/18:4(5Z,9Z,12Z,15Z))	0	0.0165242	6.11959e-06	1.54167e-06	0	0.0165242	5.99311e-06	0	1.91891e-06	6.72353e-72	1.48077	0	0.0165242	6.14783e-06	0	1.56953e-06	0.432471	1.49708	0	0	0.0301561	9.70832e-06	3.23898e-06	0	0.0301561	1.18816e-05	0	3.46917e-06	1.33784e-06	0.992068	0	0.0478275	3.50305e-05	0	8.99751e-06	0	9.28736e-05	0	0
912	1		0	0	[c] : tag1801819Z160 + h2o --> 12dgr1801819Z + hdca + h	Forward only	Glycerolipid metabolism	3.1.1.3	TAGAH1801819Z160	triacylglycerol acylhydrolase (18:0/18:1(9Z)/16:0)	0	0.0194851	0.000259916	0.00016075	0	0.0194851	0.00022946	0	0.000148765	1.84032e-06	3.0965e-06	0	0.0194851	0.000274836	0	0.000167904	0.00164696	0.0601953	0	0	0.0354856	0.000442078	0.000273009	0	0.0354856	0.000456298	0	0.000291739	7.76999e-06	0.542161	0	0.0529377	0.000471167	0	0.000306566	2.01035e-11	0.0376245	0	0
913	0		0	0	[c] : tag1801819Z180 + h2o --> 12dgr1801819Z + ocdca + h	Forward only	Glycerolipid metabolism	3.1.1.3	TAGAH1801819Z180	triacylglycerol acylhydrolase (18:0/18:1(9Z)/18:0)	0	0.0165242	9.38676e-06	2.65812e-06	0	0.0165242	9.78822e-06	0	2.76898e-06	4.68755e-06	1.41232	0	0.0165242	1.20261e-05	0	2.83576e-06	1.94617e-08	0.706018	0	0	0.0301561	2.30747e-05	5.17449e-06	0	0.0301561	1.15422e-05	0	4.15493e-06	1.11103e-29	0.0140781	0	0.0478275	2.26146e-05	0	5.80235e-06	1.57255e-09	1.41756	0	0
914	0		0	0	[c] : tag1801819Z18111Z + h2o --> 12dgr1801819Z + ocdcea + h	Forward only	Glycerolipid metabolism	3.1.1.3	TAGAH1801819Z18111Z	triacylglycerol acylhydrolase (18:0/18:1(9Z)/18:1(11Z))	0	0.0165242	3.41453e-05	9.41058e-06	0	0.0165242	1.47228e-05	-1	4.86589e-06	2.91071e-245	8.88928e-06	0	0.0165242	2.05531e-05	-1	5.2393e-06	1.29256e-128	0.0040033	1	0	0.0301561	3.63885e-05	9.57405e-06	0	0.0301561	3.51425e-05	0	1.06101e-05	7.25004e-08	1.37968	0	0.0478275	6.74212e-05	0	1.55367e-05	4.11588e-109	0.00337856	0	0
915	0		1	0	[c] : tag1801819Z1819Z + h2o --> 12dgr1801819Z + ocdce9a + h	Forward only	Glycerolipid metabolism	3.1.1.3	TAGAH1801819Z1819Z	triacylglycerol acylhydrolase (18:0/18:1(9Z)/18:1(9Z))	0	0.0178517	0.000113857	6.8466e-05	0	0.0178517	0.00013053	1	7.80138e-05	3.72896e-22	0.00401466	0	0.0178517	0.000141085	1	8.28366e-05	1.40206e-28	5.1426e-07	1	0	0.0325457	0.000231947	0.000140404	0	0.0325457	0.000229126	0	0.000145535	5.74459e-06	1.27947	0	0.0500362	0.000250844	0	0.000147895	0.000888384	0.147544	0	0
916	0		0	0	[c] : tag1801819Z1835Z9Z12Z + h2o --> 12dgr1801819Z + pa + h	Forward only	Glycerolipid metabolism	3.1.1.3	TAGAH1801819Z1835Z9Z12Z	triacylglycerol acylhydrolase (18:0/18:1(9Z)/18:3(5Z,9Z,12Z))	0	0.0165242	7.23816e-06	1.74518e-06	0	0.0165242	5.01893e-06	0	1.86525e-06	4.23182e-06	0.622078	0	0.0165242	1.06598e-05	0	2.02366e-06	2.64448e-40	0.384009	0	0	0.0301561	1.58545e-05	4.88552e-06	0	0.0301561	1.80176e-05	0	4.15286e-06	1.43712e-47	1.13342	0	0.0478275	2.08206e-05	0	5.46059e-06	8.73753e-39	0.618776	0	0
917	0		0	0	[c] : tag1801819Z1845Z9Z12Z15Z + h2o --> 12dgr1801819Z + ca	Forward only	Glycerolipid metabolism	3.1.1.3	TAGAH1801819Z1845Z9Z12Z15Z	triacylglycerol acylhydrolase (18:0/18:1(9Z)/18:4(5Z,9Z,12Z,15Z))	0	0.0165242	1.12873e-05	2.67991e-06	0	0.0165242	7.37537e-06	0	1.94978e-06	1.27677e-68	0.35554	0	0.0165242	9.80564e-06	0	2.56814e-06	3.55973e-08	1.04835	0	0	0.0301561	1.70629e-05	3.50233e-06	0	0.0301561	1.21082e-05	0	3.4827e-06	0.000758289	0.526807	0	0.0478275	2.22489e-05	0	5.30033e-06	8.67505e-152	0.640754	0	0
918	0		1	0	[c] : tag18111Z18111Z160 + h2o --> 12dgr18111Z18111Z + hdca + h	Forward only	Glycerolipid metabolism	3.1.1.3	TAGAH18111Z18111Z160	triacylglycerol acylhydrolase (18:1(11Z)/18:1(11Z)/16:0)	0	0.0194851	0.000224697	0.000135161	0	0.0194851	0.000252872	1	0.000157087	1.2331e-21	1.77866e-05	0	0.0194851	0.000281736	1	0.000175725	4.669e-47	1.04636e-19	1	0	0.0354856	0.000452205	0.000281843	0	0.0354856	0.000430287	0	0.000280351	0.0542081	0.144762	0	0.0529377	0.000496527	0	0.000315776	3.00379e-14	0.00125674	0	0
919	0		0	0	[c] : tag18111Z18111Z180 + h2o --> 12dgr18111Z18111Z + ocdca + h	Forward only	Glycerolipid metabolism	3.1.1.3	TAGAH18111Z18111Z180	triacylglycerol acylhydrolase (18:1(11Z)/18:1(11Z)/18:0)	0	0.0165242	7.96778e-06	1.6932e-06	0	0.0165242	6.47162e-06	0	1.88943e-06	3.45558e-16	1.00537	0	0.0165242	5.82288e-06	0	1.77615e-06	1.55009e-05	0.606184	0	0	0.0301561	1.95613e-05	4.32988e-06	0	0.0301561	2.00034e-05	0	5.97556e-06	6.59158e-94	1.44038	0	0.0478275	2.09858e-05	0	5.23231e-06	1.46162e-61	1.23467	0	0
[truncated: 1,475 more rows]
[truncated: 18 more columns]
